# Supplementary material for: Sirt1 activation by resveratrol is substrate sequence-selective
Source: Aging (Albany NY). 2013 Mar 8;5(3):151–4. doi: 10.18632/aging.100542 (PMC3629287; doi:10.18632/aging.100542)
Supplement: Supplementary file 1 [file aging-05-151-s001.xlsx]

## Sheet: Sirt-variants-results.csv
Sequence	ratio of residual
	acetylation signals	error
KKKKKGKEEEEKA	0.98	0.56	Rab-like GTP-binding protein 1A (662); cDNA FLJ46277 fis, clone TESTI4029731 (547); Putative GTP-binding protein Parf (662)
DEDAYKKQFSQYI	0.73	0.6	cDNA, FLJ95579, Homo sapiens ribosomal protein L5 (RPL5), mRNA (221); Ribosomal protein L5, isoform CRA_b (171); Ribosomal protein L5 variant (228); 60S ribosomal protein L5 (221)
ESQWNPKKTTIEN	0.38	0.14	cDNA FLJ12837 fis, clone NT2RP2003228, highly similar to DNA replication licensing factor MCM4 (627); cDNA FLJ54365, highly similar to DNA replication licensing factor MCM4 (587); DNA replication licensing factor MCM4 (627)
DEKKIIKDILKDK	0.64	0.2	cDNA FLJ59286, highly similar to Pre-mRNA-processing factor 40 homolog A (604); Pre-mRNA-processing factor 40 homolog A (680)
PCSDILKRNIQQY	0.53	0.12	cDNA, FLJ92612, Homo sapiens protein kinase, cAMP-dependent, regulatory, type I, alpha (tissue specific extinguisher 1) (PRKAR1A), mRNA (367); cAMP-dependent protein kinase type I-alpha regulatory subunit (367); Putative uncharacterized protein DKFZp779L0468 (367)
GAEEKFKEIAEAY	2.97	2.11	cDNA FLJ52967, highly similar to DnaJ homolog subfamily B member 1 (46); DnaJ homolog subfamily B member 1 (46); cDNA, FLJ93008, Homo sapiens DnaJ (Hsp40) homolog, subfamily B, member 1 (DNAJB1),mRNA (46); DNAJB1 protein (46)
SDPHREKTQSKPF	3.16	2.47	Putative uncharacterized protein NCOR2 (2022); Putative uncharacterized protein NCOR2 (2013); Putative uncharacterized protein NCOR2 (1467); Putative uncharacterized protein NCOR2 (2012); Putative uncharacterized protein NCOR2 (320); Nuclear receptor corepressor 2 (2033); Putative uncharacterized protein (114)
SREHALKTQNANQ	2.62	1.49	cDNA FLJ77253, highly similar to Homo sapiens nuclear receptor interacting protein 1 (NRIP1), mRNA (286); Nuclear receptor-interacting protein 1 (286)
RLKRELKQLYLER	1.67	0.52	Putative uncharacterized protein ENSP00000380341 (323); cDNA FLJ51655, highly similar to Actin-like protein 2 (267)
SKQQKRKEKLKGK	4.22	2.68	GTP-binding protein Di-Ras2 (189)
DKKVQTKGKRGAK	1.73	1.14	Putative uncharacterized protein HMGN1 (69); Putative uncharacterized protein HMGN1 (43); Non-histone chromosomal protein HMG-14 (53); High-mobility group nucleosome binding domain 1 (53)
KSHAAEKLRSNKK	2.24	1.08	Nibrin (544); cDNA FLJ78201, highly similar to Homo sapiens cell cycle regulatory protein p95 (NBS1) mRNA (544)
EGTHSTKRGHAKS	0.67	0.26	cDNA FLJ78367, highly similar to Homo sapiens fibrinogen, A alpha polypeptide (FGA), transcriptvariant alpha, mRNA (620); Fibrinogen alpha chain (620)
TEPEHTKERVKLE	1	0.61	RCC2 protein (27); Protein RCC2 (92)
AVATPAKKAAVTP	1.31	0.45	Putative uncharacterized protein NCL (63); Nucleolin (79); NCL protein (79)
KKPKAKKADVGGK	0.65	0.49	NA
VKSTANKYQVFFF	0.19	0.16	cDNA FLJ75113 (12); cDNA, FLJ96580, highly similar to Homo sapiens hepatoma-derived growth factor (high-mobility group protein 1-like) (HDGF), mRNA (44); cDNA FLJ39092 fis, clone NT2RP7019835, highly similar to HEPATOMA-DERIVED GROWTH FACTOR (37); cDNA FLJ53700, highly similar to Hepatoma-derived growth factor (12); Hepatoma-derived growth factor (44); Hepatoma-derived growth factor (High-mobilit…
ERGDASKEDIDTA	0.25	0.17	cDNA, FLJ95242, highly similar to Homo sapiens L-3-hydroxyacyl-Coenzyme A dehydrogenase, short chain (HADHSC), mRNA (241); cDNA FLJ38699 fis, clone KIDNE2002168, highly similar to Short chain 3-hydroxyacyl-CoA dehydrogenase, mitochondrial (EC 1.1.1.35) (245); Hydroxyacyl-coenzyme A dehydrogenase, mitochondrial (241)
KMKKEGKLIMGIG	0.39	0.13	ATP-citrate synthase (968); cDNA FLJ56442, highly similar to ATP-citrate synthase (EC 2.3.3.8) (1012); cDNA FLJ55447, highly similar to ATP-citrate synthase (EC 2.3.3.8) (697); ACLY variant protein (1004); cDNA FLJ37765 fis, clone BRHIP2024742, highly similar to ATP-CITRATE (568)
LEHALEKNEVDLV	0.4	0.2	Porphobilinogen deaminase (87)
SVGTAVKDLKQEQ	1.03	0.53	cDNA FLJ51340, highly similar to Homo sapiens nuclear protein, ataxia-telangiectasia locus (NPAT), mRNA (284); Nuclear protein, ataxia-telangiectasia locus (1228); Protein NPAT (1228)
AKEGFEKISKGAN	0.64	0.22	Mitochondrial heat shock 60kD protein 1 variant 1 (130); cDNA FLJ54912, highly similar to 60 kDa heat shock protein, mitochondrial (107); cDNA FLJ52281, highly similar to 60 kDa heat shock protein, mitochondrial (130); 60 kDa chaperonin (15); 60 kDa heat shock protein, mitochondrial (130); Putative uncharacterized protein HSPD1 (130)
KVRIAAKFITHAP	1.02	0.26	cDNA FLJ75422, highly similar to Homo sapiens capping protein (actin filament) muscle Z-line, alpha 1, mRNA (19); Putative uncharacterized protein CAPZA1 (9); F-actin-capping protein subunit alpha-1 (19)
RRLIFSKRKPZZZ	0.5	0.18	cDNA FLJ54803, highly similar to Cyclin-dependent kinase inhibitor 1 (195); Cyclin-dependent kinase inhibitor 1 (161); Cyclin-dependent kinase variant (188); Cyclin-dependent kinase inhibitor 1A (P21, Cip1), isoform CRA_a (161)
IAHHARKNTELEE	1.26	0.44	Nibrin (715); cDNA FLJ78201, highly similar to Homo sapiens cell cycle regulatory protein p95 (NBS1) mRNA (715)
TEADAEKTFEEKQ	1.27	0.37	Nucleolin, isoform CRA_c (270); cDNA FLJ38578 fis, clone HCHON2007674, highly similar to NUCLEOLIN (367); Putative uncharacterized protein NCL (45); Nucleolin (444); cDNA FLJ45706 fis, clone FEBRA2028457, highly similar to Nucleolin (337); NCL protein (216)
NIEAMSKLKPYFL	1.19	0.42	cDNA FLJ76813, highly similar to Homo sapiens acetyl-Coenzyme A acetyltransferase 2 (acetoacetyl Coenzyme A thiolase), mRNA (233); cDNA FLJ53975, highly similar to Acetyl-CoA acetyltransferase, cytosolic (EC 2.3.1.9) (262); Acetyl-CoA acetyltransferase, cytosolic variant (240); Acetyl-CoA acetyltransferase, cytosolic (233)
RMMEIAKAMRLKI	1.11	0.31	cDNA FLJ54770, highly similar to DNA-directed RNA polymerase I-associated factor 53 kDa subunit (EC 2.7.7.6) (303); DNA-directed RNA polymerase I subunit RPA49 (435)
SSSMDAKLEALKD	0.89	0.21	Engulfment and cell motility 1, isoform CRA_c (100); Putative uncharacterized protein ELMO1 (100); Engulfment and cell motility protein 1 (100)
SREAVEKEFEPLL	0.94	0.22	cDNA FLJ58812, highly similar to Endoplasmin (Heat shock protein 90kDa beta member 1) (278); cDNA FLJ58626, highly similar to Endoplasmin (Heat shock protein 90 kDa beta member 1) (363); Endoplasmin (613); Tumor rejection antigen (Gp96) 1 (613)
EIATVVKKRNLFA	0.59	0.19	Aspartate aminotransferase (234); Aspartate aminotransferase, mitochondrial (234); Aspartate aminotransferase (191)
RHEIVPKDIREEA	0.7	0.3	Proteasome subunit alpha type-3 (230); Proteasome subunit alpha type (230)
RIKKKTKPIVKPQ	0.71	0.26	cDNA FLJ75871, highly similar to Homo sapiens staufen, RNA binding protein (STAU), transcript variant T3, mRNA (270); cDNA FLJ34086 fis, clone FCBBF3005320, highly similar to Double-stranded RNA-binding protein Staufen homolog 1 (58); Staufen isoform b variant (284); Staufen, RNA binding protein, homolog 1 (Drosophila) (195); Double-stranded RNA-binding protein Staufen homolog 1 (270)
SAPAPKKGSKKAV	1.04	0.43	Histone H2B (13); Histone H2B type 1-C/E/F/G/I (13); Histone H2B type 1-D (13); Histone H2B type 1-H (13); Histone H2B type 1-J (13); Histone H2B type 1-K (13); Histone H2B type 1-L (13); Histone H2B type 1-N (13); Histone H2B type 1-O (13); Histone H2B type 2-E (13); Histone H2B type 2-F (13); Histone H2B type 3-B (13); Histone H2B type F-S (13); HIST1H2BC protein (13)
YHGQLTKEAAMGQ	1.08	0.14	Carnitine O-palmitoyltransferase 2, mitochondrial (544); Carnitine O-palmitoyltransferase II, mitochondrial variant (463)
APKKGSKKAVTKA	0.84	0.16	Histone H2B (16); Histone H2B type 1-C/E/F/G/I (16); Histone H2B type 1-D (16); Histone H2B type 1-H (16); Histone H2B type 1-J (16); Histone H2B type 1-K (16); Histone H2B type 1-L (16); Histone H2B type 1-N (16); Histone H2B type 1-O (16); Putative histone H2B type 2-C (16); Putative histone H2B type 2-D (16); Histone H2B type 2-E (16); Histone H2B type 3-B (16); Histone H2B type F-S (16); HIST…
KRELYDKGGEQAI	0.85	0.25	DnaJ homolog subfamily A member 1 (66); DnaJ (Hsp40) homolog, subfamily A, member 1, isoform CRA_c (66); DnaJ (Hsp40) homolog, subfamily A, member 1, isoform CRA_b (66)
QQTVSAKGPPEKR	0.96	0.32	cDNA FLJ76264, highly similar to Homo sapiens mediator of RNA polymerase II transcription, subunit 6 homolog (yeast) (MED6), mRNA (236); cDNA FLJ52756, highly similar to RNA polymerase transcriptional regulation mediator, subunit 6 homolog (243); Mediator of RNA polymerase II transcription subunit 6 (236)
EKTFEEKQGTEID	0.82	0.48	Nucleolin, isoform CRA_c (275); cDNA FLJ38578 fis, clone HCHON2007674, highly similar to NUCLEOLIN (372); Putative uncharacterized protein NCL (50); Nucleolin (449); cDNA FLJ45706 fis, clone FEBRA2028457, highly similar to Nucleolin (342); NCL protein (221)
LQENGQKDVGSYQ	0.78	0.58	cDNA FLJ77253, highly similar to Homo sapiens nuclear receptor interacting protein 1 (NRIP1), mRNA (310); Nuclear receptor-interacting protein 1 (310)
MPTPVIKAFGILK	1.18	0.31	cDNA, FLJ92753, Homo sapiens fumarate hydratase (FH), nuclear gene encodingmitochondrial protein, mRNA (94); Fumarate hydratase, mitochondrial (94)
RKEVLEKLIEKCV	0.7	0.19	Dolichol-phosphate mannosyltransferase (197); Dolichyl-phosphate mannosyltransferase polypeptide 1, catalytic subunit (192); Dolichyl-phosphate mannosyltransferase polypeptide 1, catalytic subunit (231); Dolichyl-phosphate mannosyltransferase polypeptide 1, catalytic subunit (224); Dolichyl-phosphate mannosyltransferase polypeptide 1, catalytic subunit (197)
TLADIVKDPVSRT	0.91	0.15	cDNA, FLJ92904, highly similar to Homo sapiens casein kinase 2, alpha 1 polypeptide (CSNK2A1), mRNA (102); Casein kinase II alpha 1 subunit isoform a (102); Casein kinase II subunit alpha (102); Casein kinase 2 alpha isoform (102); CSNK2A1 protein (102); HCG21984 (102)
ECKQCGKTFIYYQ	0.83	0.18	Zinc finger protein 14 (204)
EVEQLIKKHEEEE	0.9	0.24	Proteasome subunit alpha type (238); Proteasome subunit alpha type-4 (238); PSMA4 protein (167); Proteasome subunit beta type (214)
GEVIVTKDDAMLL	0.99	0.24	Mitochondrial heat shock 60kD protein 1 variant 1 (352); cDNA FLJ54912, highly similar to 60 kDa heat shock protein, mitochondrial (329); cDNA FLJ51028, highly similar to 60 kDa heat shock protein, mitochondrial (208); cDNA FLJ51046, highly similar to 60 kDa heat shock protein, mitochondrial (296); 60 kDa heat shock protein, mitochondrial (352); Short heat shock protein 60 Hsp60s2 (37)
AMGAFDKTRPVVA	1.29	0.28	Medium-chain specific acyl-CoA dehydrogenase, mitochondrial (279); cDNA FLJ52595, highly similar to Medium-chain specific acyl-CoA dehydrogenase, mitochondrial (EC 1.3.99.3) (90); cDNA FLJ50422, highly similar to Medium-chain specific acyl-CoA dehydrogenase, mitochondrial (EC 1.3.99.3) (149); cDNA FLJ55794, highly similar to Medium-chain specific acyl-CoA dehydrogenase, mitochondrial (EC 1.3.99.3…
VPKKEKKKNLAGG	1.34	0.56	Zinc finger protein 512B (835)
FMRNFQKGQVTRD	1.11	0.17	Heme oxygenase (Decycling) 1 (39); cDNA, FLJ93605, highly similar to Homo sapiens heme oxygenase (decycling) 1 (HMOX1), mRNA (39); Heme oxygenase 1 (39)
TATISSKRIVRRL	1.28	0.32	NA
ZMPEPVKSAPVPK	1.07	0.17	Histone H2B type 1-M (7)
AAPKGFKAFPGKG	0.77	0.16	Uncharacterized protein KIAA0355 (1054)
KRVDFSKVPKLKT	0.91	0.14	Acetyl-CoA acetyltransferase, mitochondrial (263)
NVGCVPKKVMWNT	0.53	0.14	Glutathion reductase delta8 alternative splicing variant (110); Glutathion reductase delta9 alternative splicing varian (110); Glutathion reductase delta8+9 alternative splicing variant (110); Glutathione reductase, mitochondrial (110)
LEGTLLKPNMVTP	0.76	0.16	Fructose-bisphosphate aldolase (112); Fructose-bisphosphate aldolase (89); Fructose-bisphosphate aldolase (202); Fructose-bisphosphate aldolase A (230); Fructose-bisphosphate aldolase C (230); Fructose-bisphosphate aldolase (72); Fructose-bisphosphate aldolase (191); Fructose-bisphosphate aldolase (211); Fructose-bisphosphate aldolase (127); Fructose-bisphosphate aldolase (153)
PDASVTKLAEQYA	0.69	0.14	Ornithine carbamoyltransferase, mitochondrial (231)
KAMLTPKPAGGDE	0.74	0.14	Antigen KI-67 (1178)
SVTVNGKEQLKWM	0.93	0.13	cDNA FLJ44080 fis, clone TESTI4039659, highly similar to DnaJ homolog subfamily B member 8 (223); DnaJ homolog subfamily B member 8 (223)
NIPAPLKPTZZZZ	0.77	0.15	Mediator of RNA polymerase II transcription subunit 28 (176)
VDGPSGKLWRDGR	0.78	0.19	Glyceraldehyde-3-phosphate dehydrogenase (106); Glyceraldehyde-3-phosphate dehydrogenase (194); Glyceraldehyde-3-phosphate dehydrogenase (169)
IPAGSKKIDPNMK	0.74	0.14	cDNA FLJ10219 fis, clone HEMBA1007018, highly similar to Cytoplasmic dynein 1 light intermediate chain 1 (283); cDNA FLJ58500, highly similar to Cytoplasmic dynein 1 light intermediate chain 1 (313); Cytoplasmic dynein 1 light intermediate chain 1 (429)
ITKKNPKKAEKLE	0.62	0.19	NA
AAWEAGKFGNEVI	0.9	0.24	Acetyl-CoA acetyltransferase, mitochondrial (230)
DVKLDFKDVLLRP	0.88	0.15	GMP reductase 2 (13); GMP reductase (13)
KKSHSIKPESWSK	0.91	0.16	cDNA, FLJ94908, highly similar to Homo sapiens PPAR binding protein (PPARBP), mRNA (1514); Mediator of RNA polymerase II transcription subunit 1 (1529)
APALVSKKLNVTE	0.78	0.31	Enolase (47); Alpha-enolase (80)
KDPETVKQLGSIL	0.82	0.19	cDNA FLJ42779 fis, clone BRAWH3005300, highly similar to Exportin-1 (333); cDNA FLJ55480, highly similar to Exportin-1 (396); cDNA, FLJ79380, highly similar to Exportin-1 (396); Exportin-1 (686)
DFRSLEKISREVK	1.15	0.21	Apoptosis-inducing factor 1, mitochondrial (295); Apoptosis-inducing factor short isoform 3 (208); Apoptosis-inducing factor short isoform 2 (295); Apoptosis-inducing factor (184); Striatal apoptosis-inducing factor (185)
FKRGVLKEYGVKV	0.9	0.44	cDNA FLJ75245, highly similar to Homo sapiens carbamoyl-phosphate synthetase 1, mitochondrial (CPS1), mRNA (527); cDNA, FLJ79324, highly similar to Carbamoyl-phosphate synthase (ammonia), mitochondrial (EC 6.3.4.16) (76); Carbamoyl-phosphate synthase [ammonia], mitochondrial (527); Putative uncharacterized protein CPS1 (527); Carbamoyl-phosphate synthetase 1 variant (537); Carbamoylphosphate synt…
EPYGKIKNYILMR	0.72	0.3	Putative uncharacterized protein MATR3 (524); cDNA FLJ10526 fis, clone NT2RP2000931, highly similar to Matrin-3 (186); cDNA FLJ55637, highly similar to Matrin-3 (186); cDNA FLJ53172, highly similar to Matrin-3 (236); cDNA, FLJ79319, highly similar to Matrin-3 (236); Matrin-3 (524); Putative uncharacterized protein DKFZp686K0542 (186); Putative uncharacterized protein DKFZp686K23100 (524); Clone C…
KDRDKEKDKMKAK	0.4	0.12	Partitioning defective 3 homolog (1007); Par-3 partitioning defective 3 homolog (C. elegans) (974); Par-3 partitioning defective 3 homolog (C. elegans) (947); PARD3 protein (991); SE2-5T2 protein (720)
GTKAAHKSAPSTG	0.59	0.42	NA
HPSTGLKTTTPGP	0.19	0.12	NBN protein (334); Nibrin (334); cDNA FLJ78201, highly similar to Homo sapiens cell cycle regulatory protein p95 (NBS1) mRNA (334); Putative uncharacterized protein NBN (171)
FIFLNAKQHKKLS	0.38	0.11	NBN protein (233); Nibrin (233); cDNA FLJ78201, highly similar to Homo sapiens cell cycle regulatory protein p95 (NBS1) mRNA (233); Putative uncharacterized protein NBN (70)
LKNAGDKRNQQPI	0.75	0.31	Histone acetyltransferase p300 (423); EP300 protein (423)
AQGCICKGASDKC	0.71	0.15	Putative uncharacterized protein MT1CP (42); Metallothionein-2 (51)
DQETIKKLFENLR	0.39	0.12	Phosphoglucomutase-2 (492)
LRRVFQKYTKYSK	0.5	0.1	Annexin A1 (239); cDNA FLJ51887, highly similar to Annexin A1 (114); Annexin I (239); Annexin A1, isoform CRA_a (239)
ANEVISKLYAVHQ	0.36	0.07	cDNA FLJ53379, highly similar to T-complex protein 1 subunit theta (447); cDNA FLJ59382, highly similar to T-complex protein 1 subunit theta (393); Putative uncharacterized protein CCT8 (25); Chaperonin containing TCP1, subunit 8 (Theta) variant (466); Chaperonin containing TCP1, subunit 8 (Theta), isoform CRA_c (415); T-complex protein 1 subunit theta (466)
IETRDGKLVSESS	0.24	0.16	cDNA FLJ77754, highly similar to Homo sapiens keratin 8 (KRT8), mRNA (472); Keratin, type II cytoskeletal 8 (472); KRT8 protein (268); Tau-tubulin kinase (662); KRT8 protein (354)
IKTLNNKFASFID	0.18	0.07	cDNA FLJ78504, highly similar to Homo sapiens keratin 6A (KRT6A), mRNA (173); cDNA FLJ77754, highly similar to Homo sapiens keratin 8 (KRT8), mRNA (101); cDNA, FLJ93744, highly similar to Homo sapiens keratin 6E (KRT6E), mRNA (173); cDNA FLJ46620 fis, clone TLUNG2000654, highly similar to Keratin, type II cytoskeletal 7 (77); cDNA FLJ60647, highly similar to Keratin, type II cytoskeletal 6B (173)…
GAHVTVKKLFVGG	0.42	0.15	Putative uncharacterized protein HNRNPA2B1 (112); Heterogeneous nuclear ribonucleoproteins A2/B1 (112)
GGPEVLKLRSDIA	0.57	0.11	Putative uncharacterized protein CRYZ (23); Quinone oxidoreductase (23)
KADQLYKQKIIRG	0.56	0.13	Mitochondrial PDHA1 (121); cDNA, FLJ92558, highly similar to Homo sapiens pyruvate dehydrogenase (lipoamide) alpha 1 (PDHA1), mRNA (83); cDNA FLJ54787, highly similar to Pyruvate dehydrogenase E1 component alpha subunit, somatic form, mitochondrial (EC 1.2.4.1) (83); cDNA FLJ52314, highly similar to Pyruvate dehydrogenase E1 component alpha subunit, somatic form, mitochondrial (EC 1.2.4.1) (83); …
DDAMLLKGKGDKA	0.96	0.2	Mitochondrial heat shock 60kD protein 1 variant 1 (359); cDNA FLJ54912, highly similar to 60 kDa heat shock protein, mitochondrial (336); cDNA FLJ51028, highly similar to 60 kDa heat shock protein, mitochondrial (215); cDNA FLJ51046, highly similar to 60 kDa heat shock protein, mitochondrial (303); 60 kDa heat shock protein, mitochondrial (359); Short heat shock protein 60 Hsp60s2 (44)
IMNLNVKKEALLA	0.8	0.24	cDNA FLJ77253, highly similar to Homo sapiens nuclear receptor interacting protein 1 (NRIP1), mRNA (111); Nuclear receptor-interacting protein 1 (111)
GIIDPTKVVRTAL	1.14	0.27	Mitochondrial heat shock 60kD protein 1 variant 1 (523); cDNA FLJ54912, highly similar to 60 kDa heat shock protein, mitochondrial (500); cDNA FLJ54373, highly similar to 60 kDa heat shock protein, mitochondrial (514); cDNA FLJ51046, highly similar to 60 kDa heat shock protein, mitochondrial (467); 60 kDa heat shock protein, mitochondrial (523)
AAKNLDKEYLPIG	0.89	0.3	Aspartate aminotransferase (94); Aspartate aminotransferase, mitochondrial (94); Aspartate aminotransferase (35); cDNA FLJ54203, highly similar to Aspartate aminotransferase, mitochondrial (EC 2.6.1.1) (94)
HKSDFGKFVLSSG	0.67	0.28	cDNA FLJ53009, highly similar to Calreticulin (32); Calreticulin (48); Calreticulin variant (37)
AYGGLLKDFTATD	0.79	0.15	Putative uncharacterized protein ACAA2 (25); cDNA, FLJ95265, highly similar to Homo sapiens acetyl-Coenzyme A acyltransferase 2 (mitochondrial 3-oxoacyl-Coenzyme A thiolase) (ACAA2), nuclear gene encoding mitochondrial protein, mRNA (25); cDNA FLJ30111 fis, clone BNGH42000360, highly similar to 3-ketoacyl-CoA thiolase, mitochondrial (EC 2.3.1.16) (25); 3-ketoacyl-CoA thiolase, mitochondrial (25)
NIGLGFKTPKEAI	1	0.19	40S ribosomal protein S11 (45)
NLFDTYKGKSLEI	0.93	0.11	Putative uncharacterized protein ENSP00000365178 (27); HLA-B associated transcript 2 (27); cDNA FLJ56810, highly similar to Large proline-rich protein BAT2 (27); Large proline-rich protein BAT2 (27); Putative uncharacterized protein BAT2 (27); Putative uncharacterized protein ENSP00000417023 (27); Putative uncharacterized protein ENSP00000411155 (27); Putative uncharacterized protein ENSP00000410…
AEMYVAKFAAKGE	0.8	0.14	cDNA FLJ60696, highly similar to Elongation factor 2 (235); cDNA FLJ56548, highly similar to Elongation factor 2 (235); cDNA FLJ58164, highly similar to Elongation factor 2 (235); Elongation factor 2 (235); EEF2 protein (235)
MACPLEKALDVMV	0.81	0.23	Protein S100-A4 (7)
ALLKYYKVDENGK	0.71	0.24	NA
EKEPFGKLQLSSR	0.75	0.14	Round spermatid basic protein 1-like protein (28)
YDTTESKLRREFE	0.65	0.11	cDNA FLJ77404, highly similar to Homo sapiens small nuclear ribonucleoprotein 70kDa polypeptide (RNP antigen) (SNRP70), transcript variant 1, mRNA (118); U1 small nuclear ribonucleoprotein 70 kDa (118)
KVQTKGKRGAKGK	0.16	0.09	Putative uncharacterized protein HMGN1 (71); Putative uncharacterized protein HMGN1 (45); Non-histone chromosomal protein HMG-14 (55); High-mobility group nucleosome binding domain 1 (55)
PSTGGVKKPHHYR	0.18	0.12	NA
NYYASQKKTFEIN	0.11	0.04	cDNA FLJ58812, highly similar to Endoplasmin (Heat shock protein 90kDa beta member 1) (347); cDNA FLJ58626, highly similar to Endoplasmin (Heat shock protein 90 kDa beta member 1) (432); Endoplasmin (682); Heat shock protein 94c (437); Tumor rejection antigen (Gp96) 1 (682)
NIKTVMKAFELID	0.61	0.12	HCG1734403 (73); cDNA FLJ50562, highly similar to DJ-1-binding protein (73); EF-hand calcium-binding domain-containing protein 6 (179); CAP-binding protein complex interacting protein 1 (98)
PAFFAEKLHQAMK	0.48	0.1	Annexin A1 (281); cDNA FLJ51887, highly similar to Annexin A1 (156); Annexin I (281); Annexin A1, isoform CRA_a (281)
TKKNYYKRIEPAD	0.76	0.16	cDNA, FLJ79525, highly similar to Homo sapiens Mak3 homolog (MAK3), mRNA (66); Putative uncharacterized protein ENSP00000373172 (51); Putative uncharacterized protein ENSP00000417110 (100); N-acetyltransferase 13 (140)
DPLAVDKIMKDLD	0.49	0.13	Protein S100-A10 (54)
SARPKLKAFLASP	0.55	0.13	Putative uncharacterized protein GSTP1 (155); Glutathione S-transferase pi (135); Glutathione S-transferase P (191)
HKFAGDKGYLTKE	0.63	0.21	S100A10 protein (23); Protein S100-A10 (23)
NIGLGFKTPKEAT	0.89	0.18	NA
QPQVQAKNQQNQQ	0.27	0.13	Histone acetyltransferase p300 (489); EP300 protein (489)
GHCEKIKKACGNF	0.47	0.1	Multifunctional protein ADE2 (285); Putative uncharacterized protein DKFZp781N1372 (292)
QVERLIKEFSIYM	0.65	0.13	Aspartate aminotransferase (396); Aspartate aminotransferase, mitochondrial (396); Aspartate aminotransferase (337); Aspartate aminotransferase (353)
RLLLQTKEDYEAL	0.91	0.22	cDNA FLJ56900 (63); Coiled-coil domain-containing protein 63 (103)
AKEKKQKRLEERA	0.2	0.12	N-acetyltransferase 11 (14)
EAMSKLKPYFLTD	0.26	0.27	cDNA FLJ76813, highly similar to Homo sapiens acetyl-Coenzyme A acetyltransferase 2 (acetoacetyl Coenzyme A thiolase), mRNA (235); cDNA FLJ53975, highly similar to Acetyl-CoA acetyltransferase, cytosolic (EC 2.3.1.9) (264); Acetyl-CoA acetyltransferase, cytosolic variant (242); Acetyl-CoA acetyltransferase, cytosolic (235)
SRSRRGKVEAAGP	0.73	0.21	Putative uncharacterized protein ENSP00000380130 (926); Histone-lysine N-methyltransferase MLL4 (926)
TDHIPEKKFKSEA	0.6	0.13	cDNA FLJ58450, highly similar to Inhibitor of growth protein 3 (149); Inhibitor of growth protein 3 (164); Transcriptional regulator ING2 (164)
KKTNKNKSSISRA	0.79	0.2	CREBBP (21); CREBBP (19); CREB-binding protein (1597); CREBBP variant protein (1627)
VIPAALKAFRRLV	0.26	0.11	Cat eye syndrome critical region protein 5 (69)
HVVMELKEKAVIF	0.42	0.13	Kinetochore-associated protein 1 (1316)
TTKPRGKWFCPRC	0.81	0.15	Inhibitor of growth family member 4 variant deltaEx2 (212); cDNA FLJ52468, highly similar to Inhibitor of growth protein 4 (184); Putative uncharacterized protein ING4 (229); Inhibitor of growth protein 4 (236); ING4 exon 4-5 boundary 12 bp skip variant (232); ING4 exon 4-5 boundary 9 bp skip variant (233); Inhibitor of growth family, member 4, isoform CRA_g (235)
VFYLKMKGDYFRY	0.7	0.2	14-3-3 protein beta/alpha (124); 14-3-3 protein theta (122); cDNA FLJ52118, highly similar to 14-3-3 protein theta (87); Putative uncharacterized protein YWHAQ (24)
WKSPLGKVKEAVK	0.76	0.14	Aldo-keto reductase family 1 member B10 (27)
ETTELLKERFDHI	0.69	0.22	cDNA, FLJ95417, highly similar to Homo sapiens aldehyde dehydrogenase 3 family, memberA1 (ALDH3A1), mRNA (178); Putative uncharacterized protein ALDH3A1 (178); Aldehyde dehydrogenase, dimeric NADP-preferring (178); cDNA FLJ36436 fis, clone THYMU2012073, highly similar to Aldehyde dehydrogenase, dimeric NADP-preferring (105); ALDH3A1 protein (237); cDNA FLJ36558 fis, clone TRACH2009107, highly sim…
YIENEGKMIMQDK	0.88	0.22	Heat shock 70kDa protein 4-like, isoform CRA_b (606); cDNA, FLJ79536, highly similar to Heat shock 70 kDa protein 4 (55); cDNA FLJ50510, highly similar to Heat shock 70 kDa protein 4 (603); cDNA FLJ52593, highly similar to Heat shock 70 kDa protein 4 (484); cDNA FLJ50643, highly similar to Heat shock 70 kDa protein 4 (94); cDNA FLJ54507, highly similar to Heat shock 70 kDa protein 4 (447); cDNA F…
HQRHDGKLWNLNN	0.95	0.26	cDNA FLJ57882, highly similar to Pre-mRNA-processing-splicing factor 8 (193); Pre-mRNA-processing-splicing factor 8 (1463)
FNEMMSKEQFNEA	0.8	0.2	cDNA FLJ51002, highly similar to Nuclear factor erythroid 2-related factor 2 (471); cDNA FLJ51196, highly similar to Nuclear factor erythroid 2-related factor 2 (464); cDNA, FLJ79047, highly similar to Nuclear factor erythroid 2-related factor 2 (471); Putative uncharacterized protein NFE2L2 (215); Nuclear factor erythroid 2-related factor 2 (487)
KAAVDLKPTLTII	0.67	0.22	cDNA FLJ75737, highly similar to Homo sapiens v-ets erythroblastosis virus E26 oncogene homolog 1 (avian) (ETS1), mRNA (8); Ets-1 p27 (8); cDNA FLJ59231, highly similar to C-ets-1 protein (8); Protein C-ets-1 (8); V-ets erythroblastosis virus E26 oncogene homolog 1 (Avian) (8); ETS1 protein (8); V-ets erythroblastosis virus E26 oncogene homolog 1 (Avian), isoform CRA_a (8)
LKHRVLKEVEAVI	0.5	0.08	cDNA FLJ53969, highly similar to Trifunctional enzyme subunit alpha, mitochondrial (270); cDNA FLJ54509, highly similar to Trifunctional enzyme subunit alpha, mitochondrial (414); Trifunctional enzyme subunit alpha, mitochondrial (460); Putative uncharacterized protein HADHA (234)
WAAVPGKTFVNIT	1.04	0.16	Profilin-1 (38); Profilin (38)
DKTFVEKLVQEQG	0.45	0.1	MYH10 protein (561); Myosin-10 (552); Myosin, heavy chain 10, non-muscle (552); MYH10 variant protein (573)
SNGAIQKIVAFEN	0.63	0.12	Putative uncharacterized protein DKFZp451D234 (206); General vesicular transport factor p115 (202)
MGKTIHKYVHLFP	0.83	0.1	SNRNP200 protein (927); U5 small nuclear ribonucleoprotein 200 kDa helicase (1176)
TGTLETKYKWCEY	0.69	0.07	Voltage-dependent anion channel 2 (87); cDNA, FLJ78818, highly similar to Voltage-dependent anion-selective channel protein 2 (33); Voltage-dependent anion channel 2 (72); Voltage-dependent anion-selective channel protein 2 (72)
PFIYGHKYDFTSS	0.6	0.08	cDNA FLJ36768 fis, clone ADIPS1000064, highly similar to Synaptic glycoprotein SC2 (131); Trans-2,3-enoyl-CoA reductase (116)
QKEHLLKYEYQPF	0.86	0.11	Putative uncharacterized protein WDR1 (95); WD repeat domain 1, isoform CRA_a (95); WD repeat-containing protein 1 isoform 1 variant (95); WD repeat-containing protein 1 isoform 1 variant (113); WD repeat-containing protein 1 (95)
VLWDINKHGLEET	0.57	0.07	Estradiol 17-beta-dehydrogenase 11 (70)
YDSMKGKGTRDKV	0.89	0.22	Annexin A2 (281); Putative annexin A2-like protein (281)
IMDQIEKYIMTRL	0.61	0.09	cDNA FLJ75284, highly similar to Homo sapiens RAB guanine nucleotide exchange factor (GEF) 1 (RABGEF1), mRNA (213); cDNA FLJ10840 fis, clone NT2RP4001315, highly similar to Rab5 GDP/GTP exchange factor (47); cDNA FLJ55772, highly similar to Rab5 GDP/GTP exchange factor (227); RAP1 short isoform (129); Rab5 GDP/GTP exchange factor (430)
AKKTVDKHSDEYK	0.85	0.09	CCAAT/enhancer-binding protein beta (269); NF-IL6 (30); CEBPB protein (61)
DFDRFSKHDIIGE	0.64	0.09	SYT2 protein (132); cDNA FLJ44960 fis, clone BRAWH2012866, highly similar to Synaptotagmin-1 (237); Synaptotagmin-1 (237); Synaptotagmin-2 (234)
VLYHLAKHPEYQE	0.79	0.15	cDNA FLJ77261, highly similar to Homo sapiens cytochrome P450, family 4, subfamily F, polypeptide 11(CYP4F11), mRNA (346); Putative uncharacterized protein CYP4F2 (346); cDNA FLJ57165, highly similar to Cytochrome P450 4F2 (EC 1.14.13.30) (197); cDNA FLJ56100, highly similar to Cytochrome P450 4F2 (EC 1.14.13.30) (273); cDNA FLJ50565, highly similar to Cytochrome P450 4F3 (EC 1.14.13.30) (197); c…
ISSIEQKEENKGG	0.65	0.28	14-3-3 protein epsilon (69); cDNA FLJ60092, highly similar to 14-3-3 protein epsilon (14-3-3E) (69); cDNA FLJ51975, moderately similar to 14-3-3 protein epsilon (14-3-3E) (69); Putative uncharacterized protein YWHAE (47); cDNA, FLJ79084, highly similar to 14-3-3 protein epsilon (14-3-3E) (47)
LAALCKKYAELLE	0.73	0.16	Alpha-taxilin (195)
FANYIDKVRFLEQ	0.67	0.09	Vimentin variant 3 (120); Vimentin variant (120); Vimentin (120)
PCKDREKHVLEAR	0.64	0.08	Retinoblastoma-binding protein 6 (1571)
EAEEWYKSKFADL	0.75	0.09	Vimentin variant 3 (292); Vimentin variant 4 (110); cDNA FLJ34494 fis, clone HLUNG2005030, highly similar to VIMENTIN (279); Vimentin variant (292); Vimentin (118); Vimentin (292)
EAEEWYKSKYADL	0.69	0.09	cDNA FLJ43599 fis, clone SMINT2017781, highly similar to PERIPHERIN (288); Peripherin (288)
WDFLPPKKIKDPD	1.15	0.26	cDNA FLJ53009, highly similar to Calreticulin (190); cDNA FLJ58668, highly similar to Calreticulin (85); Calreticulin (206); Calreticulin variant (195)
YGCLTFKYERECN	0.75	0.09	NA
EIKRINKELANIR	0.84	0.28	AP-2 complex subunit alpha-1 (35); AP-2 complex subunit alpha-2 (35); cDNA FLJ11124 fis, clone PLACE1006170, highly similar to Adapter-related protein complex 2 alpha- 2 subunit (35); cDNA FLJ61453, highly similar to Adapter-relatedprotein complex 2 alpha- 1 subunit (35); cDNA FLJ57955, highly similar to Adapter-relatedprotein complex 2 alpha- 2 subunit (35); cDNA FLJ61359, highly similar to Adap…
SNPRPSKGKMMRC	0.92	0.17	Wolf-Hirschhorn syndrome candidate 1 (127); Multiple-myeloma-related WHSC1/MMSET isoform RE-IIBP (118); Probable histone-lysine N-methyltransferase NSD2 (779)
ITGALFKHSKKGP	1.15	0.2	Cytochrome P450 1A2 (289); Cytochrome P450, family 1, subfamily A, polypeptide 2 (289)
QTVAKNKDQGTYE	0.84	0.24	cDNA FLJ56329, highly similar to Myosin light polypeptide 6 (174); Myosin light polypeptide 6 (81); MYL6 protein (46)
HSDEYIKFLRSIR	0.74	0.18	Histone deacetylase 2, isoform CRA_a (45); cDNA FLJ40057 fis, clone TCERX2000431, highly similar to HISTONE DEACETYLASE 2 (45); Histone deacetylase 2 (75)
LGPVLVKQELGEA	0.71	0.13	Prefoldin subunit 6 (66); cDNA, FLJ92435, Homo sapiens HLA class II region expressed gene KE2 (HKE2), mRNA (66)
AAQNCRKRKLENI	0.67	0.19	cDNA FLJ51002, highly similar to Nuclear factor erythroid 2-related factor 2 (500); cDNA, FLJ79047, highly similar to Nuclear factor erythroid 2-related factor 2 (500); Putative uncharacterized protein NFE2L2 (244); Nuclear factor erythroid 2-related factor 2 (516)
ANTGESKVFYYKM	0.62	0.12	14-3-3 protein epsilon (118); cDNA, FLJ79100, highly similar to 14-3-3 protein epsilon (14-3-3E) (31); cDNA, FLJ79084, highly similar to 14-3-3 protein epsilon (14-3-3E) (96)
SKVFYLKMKGDYF	1.07	0.22	14-3-3 protein beta/alpha (122); 14-3-3 protein theta (120); cDNA FLJ52118, highly similar to 14-3-3 protein theta (85); Putative uncharacterized protein YWHAQ (22)
DVVYALKRQGRTL	1.54	0.35	Histone H4 (92)
EKHGLEKPISFVK	1.03	0.19	Putative uncharacterized protein NBAS (155); Putative uncharacterized protein NBAS (104); Neuroblastoma-amplified sequence (1057)
RRKGKGKGKARAG	0.23	0.12	NA
IISDAMKKVGRKG	0.19	0.06	Mitochondrial heat shock 60kD protein 1 variant 1 (191); cDNA FLJ54912, highly similar to 60 kDa heat shock protein, mitochondrial (168); cDNA FLJ51028, highly similar to 60 kDa heat shock protein, mitochondrial (47); cDNA FLJ54373, highly similar to 60 kDa heat shock protein, mitochondrial (182); cDNA FLJ51046, highly similar to 60 kDa heat shock protein, mitochondrial (135); 60 kDa heat shock p…
TLASKLKRDDGLK	0.71	0.24	Ubiquitin carrier protein (9); Ubiquitin-conjugating enzyme E2F (Putative), isoform CRA_f (9); Putative uncharacterized protein UBE2F (9); Ubiquitin-conjugating enzyme E2F (Putative), isoform CRA_a (9); Ubiquitin-conjugating enzyme E2F (Putative), isoform CRA_g (9); NEDD8-conjugating enzyme UBE2F (9)
NMYGFRKVVHIEQ	0.4	0.15	Heat shock factor protein 1 (80); Heat shock transcription factor 1 variant (80)
RGDPGIKGDKGPP	0.84	0.25	Putative uncharacterized protein COL22A1 (1381); Collagen alpha-1(XXII) chain (1401)
SSVDAVKYFGKGT	0.83	0.14	cDNA FLJ58994, highly similar to Collagen alpha-1(VI) chain (121); cDNA FLJ61362, highly similar to Collagen alpha-1(VI) chain (121); Collagen alpha-1(VI) chain (121)
ATNPESKVFYLKM	1.01	0.21	14-3-3 protein theta (115); cDNA FLJ52118, highly similar to 14-3-3 protein theta (80); Putative uncharacterized protein YWHAQ (17)
EKGENDKSLHLLK	1	0.17	cDNA FLJ51002, highly similar to Nuclear factor erythroid 2-related factor 2 (532); cDNA FLJ51196, highly similar to Nuclear factor erythroid 2-related factor 2 (525); cDNA, FLJ79047, highly similar to Nuclear factor erythroid 2-related factor 2 (532); Nuclear factor erythroid 2-related factor 2 (548)
ALNEALKLFKMHS	0.83	0.26	cDNA FLJ61339, highly similar to Alanyl-tRNA synthetase (EC 6.1.1.7) (900); Alanyl-tRNA synthetase, cytoplasmic (876)
NRSFSLKNVKHFV	0.8	0.27	DEAD (Asp-Glu-Ala-Asp) box polypeptide 39 transcript variant (187); cDNA FLJ55484, highly similar to ATP-dependent RNA helicase DDX39 (EC 3.6.1.-) (230); ATP-dependent RNA helicase DDX39 (187); DEAD (Asp-Glu-Ala-Asp) box polypeptide 39, isoform CRA_c (187)
GDKYIAKFQGEDT	1.28	0.18	cDNA FLJ76989, highly similar to Homo sapiens kinesin family member 5B (KIF5B), mRNA (32); Tyrosine-protein kinase receptor (32); Kinesin-1 heavy chain (32); KIF5B protein (32)
HGEAQVKIWRHSY	1.25	0.2	NA
EIVPQIKEGKRVL	1.12	0.18	cDNA FLJ53048, highly similar to Phosphoglycerate mutase 1 (EC 5.4.2.1) (66); cDNA FLJ51983, highly similar to Phosphoglycerate mutase 1 (EC 5.4.2.1) (161); HCG2015269, isoform CRA_c (51); cDNA, FLJ78809, highly similar to Phosphoglycerate mutase 1 (EC 5.4.2.1) (51); Phosphoglycerate mutase 1 (176); Probable phosphoglycerate mutase 4 (176); Phosphoglycerate mutase (176)
YRSAASKTMNIYF	0.85	0.18	Phospholipase A-2-activating protein (529)
KNSSNFKKAKRVK	0.94	0.38	cDNA FLJ51764, highly similar to Histone deacetylase 1 (245); Histone deacetylase 1 (438); Putative uncharacterized protein DKFZp686H12203 (194); Histone deacetylase 1, isoform CRA_a (438)
EGGKSGKAPRRRA	0.29	0.14	Putative uncharacterized protein FOXO4 (189); Putative uncharacterized protein FOXO4 (134); cDNA FLJ56550, highly similar to Fork head domain transcription factor AFX1 (189); Forkhead box protein O4 (189)
SRNDQKKTKVKKK	0.41	0.11	cDNA FLJ76675, highly similar to Homo sapiens RAS p21 protein activator 2 (RASA2), mRNA (209); Ras GTPase-activating protein 2 (209)
TKQTARKSTGGKA	0.78	0.4	Histone H3 (10); Histone H3.1 (10); Histone H3.1t (10); Histone H3.2 (10); Histone H3.3 (10); Histone H3-like (10)
ZZSGRGKQGGKAR	0.41	0.2	Histone H2A (8); Histone H2A type 1 (8); Histone H2A type 1-A (8); Histone H2A type 1-B/E (8); Histone H2A type 1-C (8); Histone H2A type 1-D (8); Histone H2A type 1-H (8); Histone H2A type 1-J (8); Histone H2A type 2-A (8); Histone H2A type 2-B (8); Histone H2A type 2-C (8); Histone H2A type 3 (8)
KEKKKSKKDKKAK	0.42	0.14	Putative uncharacterized protein DKC1 (474); Putative uncharacterized protein DKC1 (472); H/ACA ribonucleoprotein complex subunit 4 (474)
RKQLATKAARKSA	0.62	0.28	Histone H3 (24); Histone H3.1 (24); Histone H3.2 (24); Histone H3.3 (24); Histone H3 (9)
RRRGKNKVAAQNC	0.31	0.12	Nuclear factor (Erythroid-derived 2)-like 3 (589); cDNA, FLJ93708, Homo sapiens nuclear factor (erythroid-derived 2), 45kDa (NFE2),mRNA (277); cDNA FLJ51002, highly similar to Nuclear factor erythroid 2-related factor 2 (492); cDNA FLJ51196, highly similar to Nuclear factor erythroid 2-related factor 2 (485); cDNA, FLJ79047, highly similar to Nuclear factor erythroid 2-related factor 2 (492); Put…
RPRRKGKGKGRKK	0.34	0.1	Collagen alpha-3(V) chain (249); Collagen, type V, alpha 3 preproprotein variant (162)
SSSKGKKKGRTQK	0.18	0.13	Inhibitor of growth family member 4 variant deltaEx2 (106); Inhibitor of growth family member 4 variant deltaEx6A (130); cDNA FLJ53613, highly similar to Inhibitor of growth protein 4 (130); Inhibitor of growth protein 4 (130)
RRKGKGKGRKKGR	0.25	0.11	Collagen alpha-3(V) chain (251); Collagen, type V, alpha 3 preproprotein variant (164)
TSSSGSKRHKSGS	0.11	0.07	Nuclear factor 1 (280); Nuclear factor 1 C-type (280); Nuclear factor 1 (271)
EQRNVYKDLRQIE	0.29	0.16	cDNA FLJ78533, highly similar to Homo sapiens dynamin 2 (DNM2), transcript variant 4, mRNA (594); cDNA FLJ40670 fis, clone THYMU2020959, highly similar to Dynamin-2 (205); cDNA FLJ56447, highly similar to Dynamin-2 (EC 3.6.5.5) (327); Dynamin-2 (598); cDNA FLJ45089 fis, clone BRAWH3029385, highly similar to Dynamin 2 (EC 3.6.1.50) (205); cDNA FLJ44204 fis, clone THYMU3001234, highly similar to Dy…
GAKRHRKVLRDNI	0.4	0.26	Histone H4 (21)
PSKARKKKLNKKG	0.98	0.42	Putative uncharacterized protein DOT1L (184); Histone-lysine N-methyltransferase, H3 lysine-79 specific (397)
REEHREKLRRAAE	0.64	0.51	cDNA FLJ61530, highly similar to Hepatocyte growth factor-regulated tyrosine kinase substrate (494); Hepatocyte growth factor-regulated tyrosine kinase substrate (494)
EEHGKRKKKGKGL	3.01	1.53	Proheparin-binding EGF-like growth factor (95); Diphtheria toxin receptor (Heparin-binding epidermal growth factor-like growth factor) variant (95)
NTVFDAKRLIGRK	1.23	0.47	Putative uncharacterized protein ENSP00000364804 (70); cDNA FLJ75127, highly similar to Homo sapiens heat shock 70kDa protein 1A, mRNA (71); cDNA, FLJ93166, highly similar to Homo sapiens heat shock 70kDa protein 6 (HSP70B') (HSPA6), mRNA (73); cDNA, FLJ96225, highly similar to Homo sapiens heat shock 70kDa protein 1-like (HSPA1L), mRNA (73); cDNA FLJ36606 fis, clone TRACH2015654, highly similar …
KKSKKHKKKSKKR	2.8	1.04	cDNA FLJ59286, highly similar to Pre-mRNA-processing factor 40 homolog A (797); Pre-mRNA-processing factor 40 homolog A (873); cDNA, FLJ96168, Homo sapiens formin binding protein 3 (FNBP3), mRNA (121)
ERLLPHKVFEGNR	1.24	0.24	Glucose-6-phosphate isomerase (438); Glucose-6-phosphate isomerase (477); Glucose-6-phosphate isomerase (439); Glucose-6-phosphate isomerase (466)
ITKAQKKDGKKRK	1.34	0.55	Histone H2B type 1-B (25)
GILNGQKSTGNSK	1.33	0.19	Tyrosine-protein kinase BAZ1B (416)
LNQEEKKTPSKPP	1.34	0.3	cDNA, FLJ96373, highly similar to Homo sapiens X-ray repair complementing defective repair in Chinese hamster cells 1 (XRCC1), mRNA (256); cDNA FLJ56491, highly similar to DNA-repair protein XRCC1 (256); cDNA FLJ50209, highly similar to DNA-repair protein XRCC1 (225); X-ray repair cross complementing protein 1 variant (270); DNA repair protein XRCC1 (256)
PDGLNKKRLQILL	1.58	0.32	WDR67 protein (413); cDNA FLJ37293 fis, clone BRAMY2014813 (308); WD repeat-containing protein 67 (413)
ZZSALEKSMHLGR	1.65	0.29	Protein phosphatase methylesterase 1 (8)
ARVIIEKYYTRLG	1.05	0.78	40S ribosomal protein S17 (19)
KSKKHKKKSKKRR	0.97	0.34	cDNA FLJ59286, highly similar to Pre-mRNA-processing factor 40 homolog A (798); Pre-mRNA-processing factor 40 homolog A (874); cDNA, FLJ96168, Homo sapiens formin binding protein 3 (FNBP3), mRNA (122)
KYELTGKFERLIV	1.04	0.3	Putative uncharacterized protein ANXA6 (81); cDNA FLJ75116, highly similar to Homo sapiens annexin A6, transcript variant 1, mRNA (81); Annexin A6 (81); cDNA FLJ53686, highly similar to Annexin A6 (49)
ZZZARTKQTARKS	0.26	0.13	Histone H3 (8); Histone H3.1 (8); Histone H3.1t (8); Histone H3.2 (8); Histone H3.3 (8); Histone H3-like (8)
KNEELAKRAKKLL	0.86	0.13	cDNA, FLJ94385, highly similar to Homo sapiens cofactor required for Sp1 transcriptional activation, subunit 7, 70kDa (CRSP7), mRNA (71); Mediator of RNA polymerase II transcription subunit 26 (71)
NLAILEKIKKNQR	0.81	0.12	UBE2Q1 protein (154); Galactosyl transferase-associated protein (232); Ubiquitin-conjugating enzyme E2 Q1 (232)
PPVPPKKVTAAEK	0.9	0.15	Putative uncharacterized protein UBR3 (316); E3 ubiquitin-protein ligase UBR3 (1168)
QKSGTKKLKTETD	0.61	0.1	cDNA FLJ61494, highly similar to Kinectin (270); Kinectin (270); Kinectin 1 (Kinesin receptor) (270)
DEKPPKKSLLSKV	0.94	0.15	cDNA FLJ76216, highly similar to Homo sapiens xeroderma pigmentosum, complementation group C (XPC), mRNA (45); cDNA FLJ54356, highly similar to DNA-repair protein complementing XP-C cells (45); Xeroderma pigmentosum complementation group C protein (10); Mutant mutant xeroderma pigmentosum complementation group C protein (10); DNA repair protein complementing XP-C cells (45)
RYNEAKKTLTELK	0.98	0.16	Putative uncharacterized protein CCDC93 (351); Coiled-coil domain-containing protein 93 (352)
LPESRAKALFRQM	1.02	0.13	Testis-specific serine/threonine-protein kinase 3 (112)
RERAEKKKRATKT	1.11	0.16	SWI/SNF related, matrix associated, actin dependent regulator of chromatin, subfamily a, member 1, isoform CRA_d (1039); Probable global transcription activator SNF2L1 (1039)
CQKITCKGFKVEK	0.88	0.16	cDNA FLJ57000, highly similar to Zinc finger MYM-type protein 1 (907); Zinc finger, MYM-type 1 (851); cDNA: FLJ23151 fis, clone LNG09417 (239); Zinc finger MYM-type protein 1 (926)
KVAKTWKSLSKQE	0.93	0.18	EF-hand domain-containing family member A2 (184)
PGQAAKKETKEPK	1.36	0.21	SEC16A protein (1724); SEC16A protein (1487); Putative uncharacterized protein SEC16A (491); Putative uncharacterized protein SEC16A (455); SEC16 homolog A (S. cerevisiae) (226); SEC16A protein (226); Protein transport protein Sec16A (1919)
SETGAGKHVPRAV	0.85	0.25	Putative uncharacterized protein ENSP00000351411 (59); cDNA FLJ78587 (60); cDNA FLJ32131 fis, clone PEBLM2000267, highly similar to Tubulin alpha-ubiquitous chain (25); cDNA FLJ37398 fis, clone BRAMY2027467, highly similar to Tubulin alpha-ubiquitous chain (25); cDNA FLJ53765, highly similar to Tubulin alpha chain (60); cDNA FLJ55956, highly similar to Tubulin alpha-6 chain (130); Putative unchar…
AHSSHLKSKKGQS	1.46	0.3	Cellular tumor antigen p53 (345); Cellular tumor antigen p53 (360); Cellular tumor antigen p53 (370); Cellular tumor antigen p53 (359); Cellular tumor antigen p53 (238); Cellular tumor antigen p53 (135)
KAPFQNKQLKPKQ	1.26	0.29	cDNA FLJ75527, highly similar to Homo sapiens zinc finger RNA binding protein (ZFR), mRNA (317); Zinc finger RNA binding protein (317); Putative uncharacterized protein ZFR (295); Zinc finger RNA-binding protein (317)
KEVKDVKEFKPES	2.03	0.45	Calpain-7-like protein (340)
DSRNLKKASKNDD	1.11	0.25	Cylicin-1 (389); CYLC1 protein (295); CYLC1 protein (388)
KSNAGMKHGTMDT	1.23	0.2	cDNA FLJ78654, highly similar to Homo sapiens nuclear factor of kappa light polypeptide gene enhancer in B-cells 1 (p105) (NFKB1), mRNA (432); cDNA FLJ16470 fis, clone BRHIP3009181, highly similar to NUCLEAR FACTOR NF-KAPPA-B P105 SUBUNIT (251); Nuclear factor NF-kappa-B p105 subunit (431)
AASCRVKRVTQKE	1.51	0.27	Transcription factor MafG (71)
RYMKPGKELKVLS	1.55	0.35	cDNA, FLJ93308, highly similar to Homo sapiens leukocyte-derived arginine aminopeptidase (LRAP), mRNA (135); Endoplasmic reticulum aminopeptidase 2 (135)
CIKDYMKSIKGKL	1.33	0.28	TPT1-like protein (102)
ELNFWAKRAKQRH	1.3	0.14	cDNA FLJ53235, highly similar to Caseinolytic peptidase B protein (530); cDNA FLJ53237, highly similar to Caseinolytic peptidase B protein (544); cDNA FLJ53238, highly similar to Caseinolytic peptidase B protein (388); Caseinolytic peptidase B protein homolog (589); CLPB protein (197)
VKKKVKKVQQKEG	1.4	0.22	MutS homolog 3 (E. coli) (103); cDNA FLJ75589, highly similar to Homo sapiens mutS homolog 3 (E. coli) (MSH3), mRNA (94); DNA mismatch repair protein Msh3 (103)
VVSSKTKKVTKNE	1.07	0.21	Nucleolar RNA helicase 2 (112)
ALPKAGKFGPARK	0.98	0.24	Chromosome 6 open reading frame 150 (50); Uncharacterized protein C6orf150 (50)
IHCKAGKGRTGVM	1.34	0.23	Phosphatidylinositol-3,4,5-trisphosphate 3-phosphatase and dual-specificity protein phosphatase PTEN (128)
KAYGASKTFGKAA	1.1	0.2	Replication protein A 70 kDa DNA-binding subunit (163)
VLCKKNKFGAPQK	1.08	0.29	cDNA FLJ53969, highly similar to Trifunctional enzyme subunit alpha, mitochondrial (163); cDNA FLJ54509, highly similar to Trifunctional enzyme subunit alpha, mitochondrial (307); Trifunctional enzyme subunit alpha, mitochondrial (353); Putative uncharacterized protein HADHA (127)
MKMMLDKKQIRAI	1.07	0.18	cDNA FLJ54643, highly similar to Homo sapiens SET domain and mariner transposase fusion gene (SETMAR), mRNA (92); cDNA FLJ51146, highly similar to Homo sapiens SET domain and mariner transposase fusion gene (SETMAR), mRNA (209); Putative uncharacterized protein SETMAR (112); SETMAR protein (93); Histone-lysine N-methyltransferase SETMAR (335)
FAPAPKKGSKKAV	1.12	0.25	Putative histone H2B type 2-C (13); Putative histone H2B type 2-D (13)
MDIEALKKLNRNK	0.98	0.12	Ribosomal protein L1 (91)
GRGRPRKQPPKEP	0.87	0.19	High mobility group AT-hook 1 (31); HMGA1 protein (31)
GYVQQVKYAMTRI	0.87	0.1	cDNA, FLJ92753, Homo sapiens fumarate hydratase (FH), nuclear gene encodingmitochondrial protein, mRNA (256); Fumarate hydratase, mitochondrial (256)
GQRWSAKYRYDKE	1.07	0.09	PHD finger protein 20-like protein 1 (124)
SPYSGPKFNSAIR	1	0.24	cDNA FLJ44170 fis, clone THYMU2035319, highly similar to RNA-binding region-containing protein 2 (79); cDNA FLJ60296, highly similar to RNA-binding region-containing protein 2 (76); cDNA FLJ58465, highly similar to RNA-binding region-containing protein 2 (94); RNA binding motif protein 39 (103); Putative uncharacterized protein DKFZp781C0423 (86); RNA-binding protein 39 (103)
GGMRGMKGLVYET	1.04	0.2	Citrate synthase (31); Citrate synthase (63); Citrate synthase (10); Citrate synthase, mitochondrial (76)
VAHMKSKDNRIKL	1	0.14	Putative uncharacterized protein ABCC1 (498); Multidrug resistance-associated protein 1 (498); Putative uncharacterized protein DKFZp781G125 (172); Multidrug resistance protein (482)
ALSNEKKAKKVRF	0.8	0.19	cDNA FLJ77057, highly similar to Homo sapiens doublecortex; lissencephaly, X-linked (doublecortin) (DCX), transcript variant 2, mRNA (51); cDNA FLJ60690, highly similar to Neuronal migration protein doublecortin (120); cDNA FLJ51296, highly similar to Neuronal migration protein doublecortin (51); Neuronal migration protein doublecortin (132)
NVRFGTKLGSDIK	0.92	0.14	Putative uncharacterized protein ACAA2 (137); cDNA, FLJ95265, highly similar to Homo sapiens acetyl-Coenzyme A acyltransferase 2 (mitochondrial 3-oxoacyl-Coenzyme A thiolase) (ACAA2), nuclear gene encoding mitochondrial protein, mRNA (137); cDNA FLJ30111 fis, clone BNGH42000360, highly similar to 3-ketoacyl-CoA thiolase, mitochondrial (EC 2.3.1.16) (137); 3-ketoacyl-CoA thiolase, mitochondrial (1…
TAEELKKFKLKLL	1.04	0.14	Apoptosis-associated speck-like protein containing a CARD (22)
NLNEEKKAPLRNK	0.96	0.23	Putative uncharacterized protein DIAPH2 (124); cDNA FLJ75405, highly similar to Homo sapiens diaphanous homolog 2 (Drosophila) (DIAPH2), transcript variant 12C, mRNA (124); DIAPH2 protein (124); Protein diaphanous homolog 2 (124)
CAPKKEKVAIKRI	0.95	0.15	Putative uncharacterized protein OXSR1 (42); Serine/threonine-protein kinase OSR1 (42)
VKEEVLKQLPPKK	0.83	0.16	cDNA FLJ58701, highly similar to SWI/SNF-related matrix-associated actin-dependent regulator of chromatin subfamily A containing DEAD/H box 1 (EC 3.6.1.-) (299); SWI/SNF-related matrix-associated actin-dependent regulator of chromatin subfamily A containing DEAD/H box 1 (729)
PKGSEMKYALKRL	1.05	0.09	cDNA FLJ58434, highly similar to Myb-binding protein 1A (71); cDNA FLJ57836, highly similar to Myb-binding protein 1A (71); Myb-binding protein 1A (71)
RKTIPIKYPLKEI	1.01	0.1	cDNA FLJ55373, highly similar to Isoleucyl-tRNA synthetase, cytoplasmic (EC 6.1.1.5) (354); Isoleucyl-tRNA synthetase, cytoplasmic variant (861); Isoleucyl-tRNA synthetase (76); IARS protein (689); IARS protein (63); Putative uncharacterized protein DKFZp686L17145 (734); Putative uncharacterized protein DKFZp686L0869 (844); Isoleucyl-tRNA synthetase, cytoplasmic (844)
AELEQLKGQGKSR	1.09	0.16	Vimentin variant 3 (139); cDNA FLJ34494 fis, clone HLUNG2005030, highly similar to VIMENTIN (126); Vimentin variant (139); Vimentin (139)
MKDMLEKKVKKVV	1.24	0.18	Putative heat shock protein HSP 90-alpha A5 (266)
STTGFDKSRLGTK	1.07	0.14	Thyroid hormone receptor-associated protein 3 (811)
HRKTGQKVALKKV	0.82	0.15	cDNA, FLJ94450, highly similar to Homo sapiens cyclin-dependent kinase 9 (CDC2-related kinase) (CDK9), mRNA (44); Cyclin-dependent kinase 9 (44); Cell division protein kinase 9 (44)
TIKSPSKRELAKV	1.1	0.17	cDNA, FLJ94190, highly similar to Homo sapiens CDC6 cell division cycle 6 homolog (S. cerevisiae)(CDC6), mRNA (109); Cell division control protein 6 homolog (109)
MKSAPKKSKADGQ	0.94	0.16	Putative uncharacterized protein HCFC1 (2074); Putative uncharacterized protein HCFC1 (605); Host cell factor 1 (2029)
TELVTKKKPKAEG	1.05	0.18	cDNA FLJ53449, highly similar to rRNA methyltransferase 3 (EC 2.1.1.-) (113); Putative rRNA methyltransferase 3 (234)
SHQPDKKGVPRDF	1.11	0.28	cDNA, FLJ96424 (676); Methylenetetrahydrofolate dehydrogenase (NADP+ dependent) 1-like (922); Monofunctional C1-tetrahydrofolate synthase, mitochondrial (921); Methylenetetrahydrofolate dehydrogenase (NADP+ dependent) 1-like (46); Methylenetetrahydrofolate dehydrogenase (NADP+ dependent) 1-like (20); BA251O17.4 (Similar to methylenetetrahydrofolate dehydrogenase(NADP+ dependent),methenyltetrahydr…
AMVTHVKQEPRER	1.38	0.21	Transformation/transcription domain-associated protein variant (2264); Transformation/transcription domain-associated protein (2543)
EDKAFQKEIGLKT	1.11	0.14	cDNA FLJ40643 fis, clone THYMU2017099, highly similar to SIGNAL RECOGNITION PARTICLE 68 kDa PROTEIN (113); cDNA FLJ44270 fis, clone TLIVE2008229, highly similar to SIGNAL RECOGNITION PARTICLE 68 kDa PROTEIN (414); cDNA FLJ54176, highly similar to Signal recognition particle 68 kDa protein (351); cDNA FLJ14416 fis, clone HEMBA1005202, highly similar to SIGNAL RECOGNITION PARTICLE 68 KD PROTEIN (16…
FGPLPSKWQMASS	0.87	0.23	Tumor necrosis factor (Ligand) superfamily, member 18 (90); cDNA, FLJ93785, Homo sapiens tumor necrosis factor (ligand) superfamily, member 18(TNFSF18), mRNA (68); Tumor necrosis factor ligand superfamily member 18 (68)
KELNSLKKKHAKE	1	0.13	1-phosphatidylinositol-4,5-bisphosphate phosphodiesterase beta-4 (943); Phospholipase C, beta 4 (791)
TAPSHAKFRSTGL	1.06	0.21	Serine/threonine-protein phosphatase 1 regulatory subunit 10 (207); Protein phosphatase 1, regulatory subunit 10 (207); PPP1R10 protein (207)
ANLLSGKSPRKSA	1.04	0.21	TCOF1 protein (155); cDNA FLJ57346, highly similar to Homo sapiens Treacher Collins-Franceschetti syndrome 1 (TCOF1), transcript variant 1, mRNA (155); Treacle protein (155)
YRARVEKVESPAK	0.9	0.13	cDNA, FLJ92620, highly similar to Homo sapiens staphylococcal nuclease domain containing 1 (SND1),mRNA (727); cDNA FLJ39264 fis, clone OCBBF2009603, highly similar to Staphylococcal nuclease domain-containing protein 1 (742); cDNA FLJ54574, highly similar to Staphylococcal nuclease domain-containing protein 1 (731); EBNA-2 co-activator variant (806); Staphylococcal nuclease domain-containing prot…
KGKGGTKTLMNTI	0.75	0.11	SWI/SNF related, matrix associated, actin dependent regulator of chromatin, subfamily a, member 4, isoform CRA_a (1033); SMARCA4 isoform 3 (1033); SMARCA4 isoform 2 (1033); SMARCA4 isoform 4 (1033); SWI/SNF related, matrix associated, actin dependent regulator of chromatin, subfamily a, member 4, isoform CRA_f (1033); cDNA FLJ30606 fis, clone CTONG2000330, highly similar to Probable global transc…
KKASFQKLNGISK	0.9	0.15	Putative uncharacterized protein NOP2 (649); Putative ribosomal RNA methyltransferase NOP2 (649); NOP2 protein (682)
KKAPAKKGEKIPK	0.73	0.13	NA
NLRLPKKVFEAAV	0.63	0.09	cDNA FLJ90568 fis, clone OVARC1001570, highly similar to Beta-secretase 1 (EC 3.4.23.46) (226); cDNA FLJ54690, highly similar to Beta-secretase 1 (EC 3.4.23.46) (175); Beta-site APP-cleaving enzyme 1, isoform CRA_f (200); Beta-secretase 1 (300); KIAA1149 splice variant 1 (195); Beta-site APP-cleaving enzyme 1 (300); HSPC104 (63)
FGGQSLKFGKGGQ	0.88	0.19	cDNA FLJ55072, highly similar to Succinate dehydrogenase (ubiquinone) flavoprotein subunit, mitochondrial (EC1.3.5.1) (131); cDNA FLJ61478, highly similar to Succinate dehydrogenase (ubiquinone) flavoprotein subunit, mitochondrial (EC 1.3.5.1) (179); Succinate dehydrogenase [ubiquinone] flavoprotein subunit, mitochondrial (179); Succinate dehydrogenase complex subunit A (114); Succinate dehydroge…
FHMEQLKYAELRA	0.75	0.09	cDNA FLJ57669, highly similar to SWI/SNF-related matrix-associatedactin-dependent regulator of chromatin subfamily C member 1 (455); cDNA FLJ57671, highly similar to SWI/SNF-related matrix-associated actin-dependent regulator of chromatin subfamily C member 1 (839); SWI/SNF related, matrix associated, actin dependent regulator of chromatin, subfamily c, member 1 (948); SWI/SNF complex subunit SMA…
GKKLFTKQTGEKG	1.55	0.34	cDNA FLJ53646, highly similar to Succinyl-CoA ligase (ADP-forming) beta-chain, mitochondrial (EC 6.2.1.5) (85); cDNA FLJ54097, highly similar to Succinyl-CoA ligase (ADP-forming) beta-chain, mitochondrial (EC 6.2.1.5) (9); Succinate-CoA ligase, ADP-forming, beta subunit, isoform CRA_d (85); Succinate-CoA ligase, ADP-forming, beta subunit (73); Putative uncharacterized protein DKFZp686D0880 (152);…
QHTQITKVZZZZZ	2.03	0.52	Phosphatase and tensin homolog 2 (402); Phosphatidylinositol-3,4,5-trisphosphate 3-phosphatase and dual-specificity protein phosphatase PTEN (402)
ZZZZMVKQIESKT	1.56	0.26	Thioredoxin, isoform CRA_b (7); Thioredoxin (7)
AKPLETKSFTPKT	1.63	0.33	TAF3 protein (266); Transcription initiation factor TFIID subunit 3 (266)
SSVPAQKTERKES	1.41	0.21	cDNA FLJ55932, highly similar to Homo sapiens WW domain containing adaptor with coiled-coil (WAC), transcript variant 2, mRNA (257); WW domain-containing adapter protein with coiled-coil (302)
HSSSGPKEYLGML	1.3	0.26	Myosin-Vc (1358)
VPTFGKKKGPNAN	1.43	0.28	40S ribosomal protein S30 (52)
NETDDLKRAESML	1.3	0.32	cDNA, FLJ92722, Homo sapiens plastin 3 (T isoform) (PLS3), mRNA (335); cDNA FLJ61108, highly similar to Plastin-3 (11); cDNA FLJ59681, highly similar to Plastin-3 (322); cDNA FLJ51929, highly similar to Plastin-3 (308); cDNA FLJ50683, highly similar to Plastin-3 (290); Putative uncharacterized protein PLS3 (56); Plastin-3 (335); Plastin 3 variant (335); Similar to plastin 3 (T isoform) (114)
TCDEHRKKQHVFL	0.95	0.2	cDNA FLJ51757, highly similar to Inositol 1,4,5-trisphosphate receptor type 1 (35); ITPR1 protein (258); Inositol 1,4,5-trisphosphate receptor type 1 (258)
KLEHLEKQVRLLN	1.83	0.41	BRI3-binding protein (229)
NQGEVVKHYKIRN	1.1	0.12	cDNA FLJ56184, highly similar to Proto-oncogene tyrosine-protein kinase LCK (EC 2.7.10.2) (223); Tyrosine-protein kinase Lck (179); Proto-oncogene tyrosine-protein kinase LCK (237)
EVKPGMKSRFVDS	1.47	0.28	cDNA FLJ57039, highly similar to CREB-binding protein (EC 2.3.1.48) (989); CREB-binding protein (1376); CREBBP variant protein (1406)
VNKDIGKKLMSCP	1.21	0.22	Probable histone-lysine N-methyltransferase ASH1L (406)
EEEQAQKKARDML	1.14	0.17	WD repeat-containing protein 87 (1352)
KALSNQKYREMYE	0.98	0.09	cDNA FLJ76877, highly similar to Homo sapiens superkiller viralicidic activity 2-like 2 (SKIV2L2), mRNA (198); cDNA FLJ55446, highly similar to Superkiller viralicidic activity 2-like 2 (EC 3.6.1.-) (97); Superkiller viralicidic activity 2-like 2 (198)
KDNQQKKIQKVEK	1.15	0.34	Putative uncharacterized protein LRRIQ1 (557); Leucine-rich repeat and IQ domain-containing protein 1 (582)
KDPHTHKTRCCVM	1.3	0.32	Protein tyrosine phosphatase type IVA 3 (167)
KGKRGAKGKQAEV	1.03	0.43	Putative uncharacterized protein HMGN1 (75); Putative uncharacterized protein HMGN1 (49); Non-histone chromosomal protein HMG-14 (59); High-mobility group nucleosome binding domain 1 (59)
EKALKQKGITVKQ	1.48	0.23	TBC1 domain family, member 24 (314); TBC1 domain family member 24 (314)
TSLPGDKKSGTSP	1.14	0.19	Zinc finger CCCH domain-containing protein 3 (460)
TTEIAKKKNKVEK	0.85	0.22	Sperm flagellar protein 2 (885)
HLLPRQKKGNVAQ	0.88	0.1	Testican-1 (118)
ALGSLPKEAARQN	0.61	0.09	cDNA FLJ56683, highly similar to Peroxisomal 3,2-trans-enoyl-CoA isomerase (EC 5.3.3.8) (74); Putative uncharacterized protein PECI (74); Putative uncharacterized protein PECI (151); Peroxisomal 3,2-trans-enoyl-CoA isomerase (104); Peroxisomal D3,D2-enoyl-CoA isomerase isoform 1 variant (74); Peroxisomal D3,D2-enoyl-CoA isomerase isoform 1 variant (111); PECI protein (74); Hepatocellular carcinom…
QAQALSKELRMKQ	0.63	0.11	cDNA FLJ16153 fis, clone BRAMY3000210, highly similar to Nesprin-1 (1039); cDNA FLJ55924, highly similar to Nesprin-1 (633); cDNA, FLJ79000, highly similar to Nesprin-1 (633); Spectrin repeat containing, nuclear envelope 1 (8431); Spectrin repeat containing, nuclear envelope 1 (2846); SYNE1 protein (719); Spectrin repeat containing, nuclear envelope 1 (586); Spectrin repeat containing, nuclear en…
AREWTQKYAMZZZ	0.81	0.15	Ubiquitin carrier protein (115); Ubiquitin carrier protein (106); Ubiquitin-conjugating enzyme E2 D1 (144); Ubiquitin-conjugating enzyme E2 D2 (144); Ubiquitin-conjugating enzyme E2 D4 (144)
RCKSGNKFFSMPL	0.82	0.18	cDNA FLJ53705 (143); cDNA FLJ55128 (206); cDNA FLJ60009 (240); UPF0406 protein C16orf57 (258)
SPAPAPKFSPVTP	1.15	0.23	cDNA FLJ53160, highly similar to Zyxin (178); Zyxin, isoform CRA_a (108); cDNA FLJ61463, highly similar to Zyxin (209); Putative uncharacterized protein ZYX (82); ESP-2 (186); ZYX protein (159); ZYX protein (274); Zyxin (265)
GYMSDVKRISATS	0.97	0.2	Serine hydroxymethyltransferase (20); Serine hydroxymethyltransferase (160); Serine hydroxymethyltransferase (112); Serine hydroxymethyltransferase (136); Serine hydroxymethyltransferase (190); Serine hydroxymethyltransferase (119); Serine hydroxymethyltransferase, mitochondrial (181); Serine hydroxymethyltransferase (181); Serine hydroxymethyltransferase (157)
SEGYPGKRYYGGA	0.89	0.15	Serine hydroxymethyltransferase (82); Serine hydroxymethyltransferase, mitochondrial (103); Serine hydroxymethyltransferase (103)
DKPKLEKDKGKAK	0.97	0.09	Sperm-associated antigen 17 (159)
LQLKEQKNAGTRT	0.8	0.12	cDNA FLJ78299, highly similar to Homo sapiens signal transducer and activator of transcription 1, 91kDa (STAT1), transcript variant alpha, mRNA (413); Signal transducer and activator of transcription 1 (413); Putative uncharacterized protein DKFZp686B04100 (413); Signal transducer and activator of transcription 1-alpha/beta (413)
TMLANEKAPVEGI	0.76	0.12	cDNA FLJ53756, highly similar to SPRY domain-containing protein 4 (61); SPRY domain-containing protein 4 (139)
GSQSGAKMRMGPG	1.02	0.14	Protein phosphatase methylesterase 1 (30)
LLVPSAKRRSRKT	0.82	0.15	Putative uncharacterized protein TNRC18 (115); Trinucleotide repeat-containing gene 18 protein (2301)
ASRSGIKKRHSMP	0.97	0.17	Protein bassoon (2554)
LKKLRGKEKPKKG	0.98	0.16	Mitochondrial ribosomal protein S33 (91); Putative uncharacterized protein MRPS33 (81); 28S ribosomal protein S33, mitochondrial (91)
LNALKKKNQLVQK	1	0.29	Putative uncharacterized protein PRDM2 (1425); cDNA FLJ53305, highly similar to PR domain zinc finger protein 2 (1152); PR domain zinc finger protein 2 (1425); PR-domain zinc finger protein 2 variant (1283); PR domain containing 2, with ZNF domain (1283); Putative uncharacterized protein PRDM2 (1224)
QALSNEKKAKKVR	1.02	0.16	cDNA FLJ77057, highly similar to Homo sapiens doublecortex; lissencephaly, X-linked (doublecortin) (DCX), transcript variant 2, mRNA (50); cDNA FLJ60690, highly similar to Neuronal migration protein doublecortin (119); cDNA FLJ51296, highly similar to Neuronal migration protein doublecortin (50); Neuronal migration protein doublecortin (131)
KGKNRYKNILPFD	1.11	0.17	cDNA FLJ60320, highly similar to Tyrosine-protein phosphatase non-receptor type6 (EC 3.1.3.48) (265); cDNA FLJ59423, highly similar to Tyrosine-protein phosphatase non-receptor type6 (EC 3.1.3.48) (238); Putative uncharacterized protein PTPN6 (279); Tyrosine-protein phosphatase non-receptor type 6 (277); Protein tyrosine phosphatase, non-receptor type 6 isoform 1 variant (277); cDNA, FLJ93911, Ho…
LKKKMDKKRQEKI	1.17	0.14	1-phosphatidylinositol-4,5-bisphosphate phosphodiesterase beta-1 (1074)
STKELIKSINEKF	0.65	0.2	cDNA, FLJ92684, highly similar to Homo sapiens IK cytokine, down-regulator of HLA II (IK), mRNA (408); cDNA FLJ53904, highly similar to Protein Red (220); IK cytokine, down-regulator of HLA II (408); Chondrosarcoma-associated protein 2 (408); Protein Red (408)
TESKSKKSSSSTT	0.58	0.31	AT-rich interactive domain-containing protein 1A (997); ARID1A variant protein (651); AT rich interactive domain 1A (SWI-like) (37); SWI related protein (614)
LLSVAYKNVIGAR	1.02	0.2	14-3-3 protein epsilon (50); cDNA FLJ51975, moderately similar to 14-3-3 protein epsilon (14-3-3E) (50); Putative uncharacterized protein YWHAE (28); cDNA, FLJ79084, highly similar to 14-3-3 protein epsilon (14-3-3E) (28)
ASQGSKKSKSSSK	0.96	0.18	cDNA FLJ75668, highly similar to Homo sapiens MyoD family inhibitor (MDFI), mRNA (143); MyoD family inhibitor (82); MyoD family inhibitor (143)
KGKKGKKDSSSSG	1.05	0.25	Alpha thalassemia/mental retardation syndrome X-linked (1939); Transcriptional regulator ATRX (1939); cDNA FLJ56865, highly similar to Transcriptional regulator ATRX (EC 3.6.1.-) (305); cDNA FLJ56848, highly similar to Transcriptional regulator ATRX (EC 3.6.1.-) (101)
LVHRARKLAQQYY	0.93	0.16	Putative uncharacterized protein PSMA2 (22); Proteasome subunit alpha type-2 (92); Proteasome subunit alpha type (92); Proteasome (Prosome, macropain) subunit, alpha type, 2, isoform CRA_a (14)
KLFLDHKTLYYDV	0.67	0.12	MYST3 protein (604); MYST4 protein (523); MYST histone acetyltransferase (Monocytic leukemia) 4 (815); cDNA FLJ16623 fis, clone TESTI4015204, highly similar to Histone acetyltransferase MYST2 (EC 2.3.1.48) (276); cDNA FLJ50463, highly similar to Histone acetyltransferase MYST2 (EC 2.3.1.48) (293); cDNA FLJ52588, highly similar to Mus musculus MYST histone acetyltransferase 2 (Myst2), mRNA (322); …
WILGEIKTSGLRG	0.84	0.1	cDNA FLJ57201, highly similar to NADH-ubiquinone oxidoreductase 51 kDa subunit, mitochondrial (EC 1.6.5.3) (81); NADH dehydrogenase [ubiquinone] flavoprotein 1, mitochondrial (81); NADH dehydrogenase (Ubiquinone) flavoprotein 1, 51kDa variant (81)
FNKGKLKVLATTF	0.53	0.11	Heat shock 70kDa protein 4-like, isoform CRA_b (221); cDNA FLJ14916 fis, clone PLACE1006958, highly similar to Heat shock 70 kDa protein 4L (221); cDNA FLJ59635, highly similar to Heat shock 70 kDa protein 4L (195); cDNA FLJ55529, highly similar to Heat shock 70 kDa protein 4L (252); Heat shock 70 kDa protein 4L (221); Heat shock protein apg-1 (221)
LKERLEKFFHRYL	0.56	0.11	cDNA FLJ60592 (27); UPF0550 protein C7orf28 (170); Putative uncharacterized protein DKFZp586I1023 (83)
SLHYLRKISTYVQ	0.58	0.11	Putative uncharacterized protein TBCCD1 (35); TBCC domain-containing protein 1 (35)
DEEILEKLRSIVS	0.54	0.09	cDNA FLJ77226, highly similar to Homo sapiens p21 activated kinase 1B (PAK1B) mRNA (256); PAK3b protein (269); PAK3c protein (275); PAK3cb protein (290); cDNA, FLJ96299, highly similar to Homo sapiens p21 (CDKN1A)-activated kinase 3 (PAK3), mRNA (254); cDNA FLJ30666 fis, clone FCBBF1000627, highly similar to Serine/threonine-protein kinase PAK 1 (EC 2.7.11.1) (256); cDNA FLJ51645, highly similar …
EYELEAKSHLKDD	0.58	0.1	Cingulin-like protein 1 (1052)
CLRACKKGFIQRI	0.33	0.12	cDNA, FLJ94125, highly similar to Homo sapiens tissue factor pathway inhibitor(lipoprotein-associated coagulation inhibitor) (TFPI), mRNA (269); Putative uncharacterized protein TFPI (269); Tissue factor pathway inhibitor (Lipoprotein-associated coagulation inhibitor), isoform CRA_a (269); Tissue factor pathway inhibitor (269)
SKEDLKKLHDFEE	0.37	0.08	Putative uncharacterized protein TRPM6 (1138); Transient receptor potential cation channel, subfamily M, member 6 (808); cDNA: FLJ22628 fis, clone HSI06177 (808); Transient receptor potential cation channel subfamily M member 6 (1145)
KLVAIPKPTVPPS	0.86	0.19	AF4/FMR2 family member 4 (79); Putative uncharacterized protein AFF4 (79); AFF4 protein (79)
DSKGQTKLLQLLT	0.86	0.2	Nuclear receptor coactivator 2 (640)
GHEFIVKREHALT	0.83	0.21	Transcription elongation factor B polypeptide 1 (32)
FAEFSKKCSERWK	0.98	0.11	Putative high mobility group protein B3-like protein (44); High mobility group protein B2 (44); High mobility group protein B3 (44); Non-histone chromosomal protein (44); High-mobility group box 2 (44); Putative uncharacterized protein DKFZp779G118 (74)
LRDMFYKILHGFK	0.76	0.14	cDNA FLJ54538, highly similar to Transportin-2 (845); TNPO2 variant protein (1016); Transportin 2 (Importin 3, karyopherin beta 2b), isoform CRA_b (852); Transportin-2 (862)
VKSKAKKTVDKHS	1.11	0.21	CCAAT/enhancer-binding protein beta (265); NF-IL6 (26); CEBPB protein (57)
AGNNWAKGHYTEG	1.36	0.37	TUBB2B protein (31); TUBB2A protein (96); HCG1983504, isoform CRA_f (31); cDNA, FLJ93005, highly similar to Homo sapiens tubulin, beta polypeptide (TUBB), mRNA (103); cDNA, FLJ95457, highly similar to Homo sapiens tubulin, beta, 4 (TUBB4), mRNA (103); Tubulin, beta 6, isoform CRA_a (31); cDNA FLJ55189, highly similar to Tubulin beta-4 chain (68); cDNA FLJ53341, highly similar to Tubulin beta-4 ch…
SVKNPFKEMFTQE	0.99	0.16	UPF0489 protein C5orf22 (264)
ETIDTLKQELKDI	0.93	0.17	Putative uncharacterized protein KIF15 (1008); Putative uncharacterized protein KIF15 (644); Kinesin-like protein KIF15 (1009)
EYKGETKSFYPEE	1.02	0.17	Similar to Chain , Heat-Shock Cognate 70kd Protein (44kd Atpase N-Terminal) (E.C.3.6.1.3) Mutant With Asp 206 Replaced By Ser (D206s) (68); cDNA FLJ38781 fis, clone LIVER2000216, highly similar to HEAT SHOCK COGNATE 71 kDa PROTEIN (87); cDNA FLJ59163, highly similar to Heat shock cognate 71 kDa protein (112); Heat shock cognate 71 kDa protein (112); Heat shock 70kDa protein 8 isoform 1 variant (1…
SYKGETKAFYPEE	0.72	0.15	cDNA FLJ75127, highly similar to Homo sapiens heat shock 70kDa protein 1A, mRNA (112); cDNA FLJ54328, highly similar to Heat shock 70 kDa protein 1 (89); Heat shock 70 kDa protein 1A/1B (112); Heat shock protein 72 (26)
CDQNWYKAELNGK	1.16	0.18	cDNA, FLJ96637, Homo sapiens growth factor receptor-bound protein 2 (GRB2), mRNA (38); cDNA FLJ33691 fis, clone BRAWH2002976, highly similar to GROWTH FACTOR RECEPTOR-BOUND PROTEIN 2 (38); Growth factor receptor-bound protein 2 (38); GRB2 protein (38)
EWFDHDKVSQTKG	0.98	0.2	Putative uncharacterized protein KIAA1199 (333); Protein KIAA1199 (333)
QPSQEVKMEAKME	1.3	0.27	Histone acetyltransferase p300 (977); EP300 protein (977)
GDEAQSKRGILTL	1.06	0.2	Beta-actin (51); Putative uncharacterized protein ACTA1 (63); cDNA FLJ78096, highly similar to Homo sapiens actin, alpha, cardiac muscle (ACTC), mRNA (63); Actin, aortic smooth muscle (63); Actin, cytoplasmic 1 (61); Actin, alpha cardiac muscle 1 (63); Actin, cytoplasmic 2 (61); Actin, gamma-enteric smooth muscle (62); Actin, alpha skeletal muscle (63); cDNA FLJ39583 fis, clone SKMUS2004897, high…
GSTGVGKIIMTAA	1.2	0.23	cDNA, FLJ95417, highly similar to Homo sapiens aldehyde dehydrogenase 3 family, memberA1 (ALDH3A1), mRNA (194); Putative uncharacterized protein ALDH3A1 (194); Aldehyde dehydrogenase, dimeric NADP-preferring (194); cDNA FLJ36436 fis, clone THYMU2012073, highly similar to Aldehyde dehydrogenase, dimeric NADP-preferring (121); ALDH3A1 protein (253); cDNA FLJ36558 fis, clone TRACH2009107, highly sim…
ISTQQEKETIAKC	1.26	0.33	cDNA FLJ78635, highly similar to Homo sapiens ATP synthase, H+ transporting, mitochondrial F0 complex, subunit b, isoform 1 (ATP5F1), transcript variant 1, mRNA (233); ATP synthase subunit b, mitochondrial (233); cDNA, FLJ94101, Homo sapiens ATP synthase, H+ transporting, mitochondrial F0complex, subunit b, isoform 1 (ATP5F1), mRNA (233); ATP synthase, H+ transporting, mitochondrial F0 complex, s…
LDSGHEKKVISSL	0.8	0.17	Putative uncharacterized protein FCGR1C (149); High affinity immunoglobulin gamma Fc receptor I (335); High affinity immunoglobulin gamma Fc receptor IB (241); Putative high affinity immunoglobulin gamma Fc receptor IC (241)
FRHLQLKEQKNAG	0.72	0.12	cDNA FLJ78299, highly similar to Homo sapiens signal transducer and activator of transcription 1, 91kDa (STAT1), transcript variant alpha, mRNA (410); Signal transducer and activator of transcription 1 (410); Putative uncharacterized protein DKFZp686B04100 (410); Signal transducer and activator of transcription 1-alpha/beta (410)
YNADGGKMPIKWM	0.79	0.11	ERBB4 protein (871); Receptor tyrosine-protein kinase erbB-4 (881); Putative uncharacterized protein ERBB4 (52)
FYRKGVKAVDPKT	0.91	0.14	Serine hydroxymethyltransferase (171); Serine hydroxymethyltransferase (276); Serine hydroxymethyltransferase 2 (Mitochondrial), isoform CRA_h (201); Serine hydroxymethyltransferase (228); Serine hydroxymethyltransferase (252); Serine hydroxymethyltransferase (306); Serine hydroxymethyltransferase (235); Serine hydroxymethyltransferase, mitochondrial (297); Serine hydroxymethyltransferase (297); …
GTQNKRKIALEDV	0.65	0.1	cDNA FLJ77439, highly similar to Homo sapiens hCMT1b mRNA (guanine-7-)methyltransferase (128); mRNA cap guanine-N7 methyltransferase (128); RNMT protein (128)
LTLGHFKEQLSKK	0.65	0.1	Axin-2 (792); AXIN2 protein (727); Putative uncharacterized protein DKFZp781B0869 (792)
QVRLATKTEPKKL	0.73	0.12	cDNA, FLJ95902, highly similar to Homo sapiens transcription elongation factor B polypeptide 3B(elongin A2) (TCEB3B), mRNA (21); Putative uncharacterized protein TCEB3B (21); RNA polymerase II transcription factor SIII subunit A3-like-1 (21); RNA polymerase II transcription factor SIII subunit A3-like-2 (21); RNA polymerase II transcription factor SIII subunit A2 (21); RNA polymerase II transcrip…
GPPGTGKTLIARA	0.75	0.11	VCP protein (89); Valosin-containing protein (189); Transitional endoplasmic reticulum ATPase (251)
RRSWARKRQAAHT	0.94	0.1	Erythroid Kruppel-like factor 1 variant (245); Krueppel-like factor 1 (274)
DRSNEFKNLREFW	0.81	0.18	Isovaleryl-CoA dehydrogenase, mitochondrial (75); Isovaleryl Coenzyme A dehydrogenase (75)
SKVFYYKMKGDYH	0.91	0.18	14-3-3 protein epsilon (123); cDNA, FLJ79100, highly similar to 14-3-3 protein epsilon (14-3-3E) (36); cDNA, FLJ79084, highly similar to 14-3-3 protein epsilon (14-3-3E) (101)
FMSRLEKAYEARR	1	0.16	Putative uncharacterized protein RECQL (205); ATP-dependent DNA helicase Q1 (206)
QNCKLAKEKKLLE	0.89	0.21	cDNA FLJ77145, highly similar to Homo sapiens myosin, heavy polypeptide 9, non-muscle (MYH9), mRNA (992); Myosin-9 (992); Myosin, heavy polypeptide 9, non-muscle, isoform CRA_a (992); MYH9 protein (992); Non-muscle myosin heavy chain (52)
SAELDKKANLLKC	1.1	0.16	Polyhomeotic homolog 1 (Drosophila) (794); Polyhomeotic-like protein 1 (794); Polyhomeotic-like protein 1 variant (889); PHC1 protein (747); Putative uncharacterized protein DKFZp686A1782 (400)
TICSLEKKSLLRD	0.92	0.14	Anaphase promoting complex subunit 7 (229); Anaphase-promoting complex subunit 7 (229); cDNA FLJ11747 fis, clone HEMBA1005530, highly similar to Anaphase-promoting complex subunit 7 (229); ANAPC7 protein (228)
ZZZMDEKVFTKEL	1.01	0.21	Serine/threonine-protein phosphatase (7); Serine/threonine-protein phosphatase 2A catalytic subunit alpha isoform (7)
LNYKDKKLNIGPA	0.69	0.16	Putative uncharacterized protein BOLL (107); Protein boule-like (102)
VRRMELKADQLYK	0.81	0.15	Mitochondrial PDHA1 (115); cDNA, FLJ92558, highly similar to Homo sapiens pyruvate dehydrogenase (lipoamide) alpha 1 (PDHA1), mRNA (77); cDNA FLJ54787, highly similar to Pyruvate dehydrogenase E1 component alpha subunit, somatic form, mitochondrial (EC 1.2.4.1) (77); cDNA FLJ52314, highly similar to Pyruvate dehydrogenase E1 component alpha subunit, somatic form, mitochondrial (EC 1.2.4.1) (77); …
DLTWYAKGRAPCA	0.8	0.1	Multiple myeloma tumor-associated protein 2 (53)
FQLVQMKDFRFSY	0.69	0.14	cDNA FLJ61698, highly similar to Golgi apparatus protein 1 (736); Golgi apparatus protein 1 (747)
ZZZAAYKLVLIRH	0.61	0.09	PGAM-B (8); Phosphoglycerate mutase 1 (8); Probable phosphoglycerate mutase 4 (8); Phosphoglycerate mutase (8)
ISSIEQKTERNEK	0.7	0.14	14-3-3 protein beta/alpha (70); Tyrosine 3-monooxygenase/tryptophan 5-monooxygenase activation protein, beta polypeptide (70); Tyrosine 3-monooxygenase/tryptophan 5-monooxygenase activation protein, beta polypeptide variant (112)
SEYEKEKLNERLA	0.83	0.15	cDNA FLJ54912, highly similar to 60 kDa heat shock protein, mitochondrial (366); cDNA FLJ54373, highly similar to 60 kDa heat shock protein, mitochondrial (380); cDNA FLJ51046, highly similar to 60 kDa heat shock protein, mitochondrial (333); 60 kDa heat shock protein, mitochondrial (389)
SKLPEVKSTSERF	0.68	0.15	Rho guanine nucleotide exchange factor 19 (428); cDNA FLJ60716, highly similar to Homo sapiens Rho guanine nucleotide exchange factor (GEF) 19 (ARHGEF19), mRNA (428); Rho guanine nucleotide exchange factor (GEF) 19 (111); Rho guanine nucleotide exchange factor (GEF) 19 (116)
EKKSSRKSEYLLP	0.75	0.13	Myosin light chain kinase, smooth muscle (608)
SSSPACKASSGLE	0.8	0.13	Histone acetyltransferase KAT2B (416)
LAPNQTKELEEKV	0.72	0.12	Protein 4.1 (361); Putative uncharacterized protein EPB41 (103); Putative uncharacterized protein EPB41 (361); EPB41 protein (272); EPB41 protein (152); EPB41 protein (166); Protein 4.1 variant (378)
GSFDKFKEKLTAA	0.74	0.11	Superoxide dismutase (86); Superoxide dismutase (93); Superoxide dismutase (131); Superoxide dismutase (128); Superoxide dismutase [Mn], mitochondrial (132)
SALLDGKNVNAGG	0.86	0.14	cDNA FLJ38670 fis, clone HSYRA2000190, highly similar to Voltage-dependent anion-selective channel protein 1 (266); cDNA FLJ57715, highly similar to Voltage-dependent anion-selective channel protein 1 (139); Voltage-dependent anion-selective channel protein 1 (266)
SLVNQAKKETYMK	0.56	0.1	Bromodomain adjacent to zinc finger domain protein 2B (394); BAZ2B protein (331); Putative uncharacterized protein DKFZp686H10114 (392)
ALSKKSKGQVKEE	0.89	0.13	cDNA, FLJ92658, highly similar to Homo sapiens poly (ADP-ribose) polymerase family, member 1 (PARP1), mRNA (508); cDNA FLJ53442, highly similar to Poly (ADP-ribose) polymerase 1 (EC 2.4.2.30) (487); Poly [ADP-ribose] polymerase 1 (508)
LEGGAAKRETKEV	1.02	0.12	cDNA FLJ58484, highly similar to Band 4.1-like protein 2 (191); Band 4.1-like protein 2 (191); EPB41L2 protein variant (194); Putative uncharacterized protein DKFZp781H1755 (191)
VEAPSRKRKLSPG	0.83	0.12	Ataxin-7-like protein 2 (571); Ataxin 7-like 2 (198)
TAEVELKKGATLK	0.85	0.12	Pyruvate kinase (120); Pyruvate kinase isozymes M1/M2 (135)
YHAETIKNVRTAT	0.85	0.13	Pyruvate kinase (89); Pyruvate kinase (74); Pyruvate kinase isozymes M1/M2 (89)
RTTRDEKRRAQHN	0.65	0.17	Upstream transcription factor 1, isoform CRA_b (171); Upstream stimulatory factor 1 BD (140); Upstream stimulatory factor 1 (199)
KAKNSKKKGAKKE	0.62	0.43	cDNA FLJ53386, highly similar to Signal recognition particle receptor subunit alpha (141); SRPR protein (169); Signal recognition particle receptor subunit alpha (169)
AQSRGEKRTAHNA	0.24	0.06	Sterol regulatory element-binding protein-1a (Delta) (324); Sterol regulatory element-binding protein-1c (Delta) (300); cDNA FLJ33812 fis, clone CTONG2002270, highly similar to Sterol regulatory element-binding protein 1 (300); cDNA FLJ46461 fis, clone THYMU3021586, highly similar to Sterol regulatory element-binding protein 1 (70); cDNA FLJ55675, highly similar to Sterol regulatory element-bindi…
KKESKKKTLKNDC	0.47	0.12	cDNA FLJ60139, highly similar to Homo sapiens HIV TAT specific factor 1 (HTATSF1), mRNA (506); HIV Tat-specific factor 1 (506)
GGKAPRKQLATKA	1.16	0.3	Histone H3 (19); Histone H3.1 (19); Histone H3.2 (19); Histone H3.3 (19); Histone H3-like (19)
VTKAQKKDGKKRK	1.16	0.33	Histone H2B (25); Histone H2B type 1-C/E/F/G/I (25); Histone H2B type 1-D (25); Histone H2B type 1-H (25); Histone H2B type 1-J (25); Histone H2B type 1-K (25); Histone H2B type 1-L (25); Histone H2B type 1-N (25); Histone H2B type 1-O (25); Putative histone H2B type 2-C (25); Putative histone H2B type 2-D (25); Histone H2B type 2-E (25); Histone H2B type 3-B (25); HIST1H2BC protein (25)
QNKGGIKRSASAA	0.65	0.1	Protein KIAA0649 (338)
QPRYPRKSTPRRN	0.83	0.14	cDNA FLJ75396 (22); Putative uncharacterized protein ENSP00000237694 (22)
GDGTQNKRKIALE	0.7	0.13	cDNA FLJ77439, highly similar to Homo sapiens hCMT1b mRNA (guanine-7-)methyltransferase (126); mRNA cap guanine-N7 methyltransferase (126); RNMT protein (126)
ZZSGRGKTGGKAR	0.45	0.16	Histone H2A.x (8)
AKNSKKKGAKKEG	0.62	0.23	cDNA FLJ53386, highly similar to Signal recognition particle receptor subunit alpha (142); SRPR protein (170); Signal recognition particle receptor subunit alpha (170)
AHNAIEKRYRSSI	0.71	0.11	Sterol regulatory element-binding protein-1a (Delta) (333); Sterol regulatory element-binding protein-1c (Delta) (309); cDNA FLJ46461 fis, clone THYMU3021586, highly similar to Sterol regulatory element-binding protein 1 (79); cDNA FLJ55675, highly similar to Sterol regulatory element-binding protein 1 (266); cDNA FLJ55891, highly similar to Sterol regulatory element-binding protein 1 (259); cDNA…
RRGRRRKYNPTRN	0.82	0.19	Methyl-CpG-binding domain protein 6 (956); Methyl-CpG binding domain protein 6 (956)
DYEALIKSLKVLL	0.24	0.09	cDNA FLJ56900 (71); Coiled-coil domain-containing protein 63 (111)
ETKESKKEDLVFI	0.6	0.19	Cofilin-1 (96); Cofilin-2 (96); cDNA, FLJ94864, Homo sapiens cofilin 2 (muscle) (CFL2), mRNA (96)
TTRCPYKDTLGPM	0.44	0.12	cDNA FLJ76297, highly similar to Homo sapiens eukaryotic translation initiation factor 3, subunit 4 delta, 44kDa (EIF3S4), mRNA (172); cDNA, FLJ79234, moderately similar to Eukaryotic translation initiation factor 3 subunit 4 (45); Eukaryotic translation initiation factor 3 subunit G (172); EIF3S4 protein (172)
NARRKPKGSPRVP	0.13	0.03	cDNA FLJ16830 fis, clone UTERU3022536, highly similar to Chromodomain helicase-DNA-binding protein 4 (EC 3.6.1.-) (249); Chromodomain-helicase-DNA-binding protein 4 (275); CHD4 protein (275)
AFKDKYKQIFLGG	0.54	0.16	ADP/ATP translocase 2 (96); ADP/ATP translocase 3 (96); cDNA, FLJ96310, highly similar to Homo sapiens solute carrier family 25 (mitochondrial carrier; adenine nucleotide translocator), member 5 (SLC25A5), mRNA (96); ADP/ATP translocase (48); ADP,ATP carrier protein, liver isoform T2 variant (121); cDNA, FLJ92654, highly similar to Homo sapiens solute carrier family 25 (mitochondrial carrier; ade…
SGLGKAKRKACPL	0.5	0.16	PCNA-associated factor (95)
VIARLTKEVTAAR	0.73	0.15	Pre-mRNA-processing factor 19 (122)
ATKAARKSTPSTC	0.46	0.1	Histone H3-like (28)
FRSLVIKNSTSRN	0.55	0.18	Nibrin (665); cDNA FLJ78201, highly similar to Homo sapiens cell cycle regulatory protein p95 (NBS1) mRNA (665)
TVTKTDKTLVLLM	0.26	0.1	Profilin-1 (108); Profilin (108)
KEYNYDKSIVDSG	0.66	0.2	cDNA FLJ90568 fis, clone OVARC1001570, highly similar to Beta-secretase 1 (EC 3.4.23.46) (211); cDNA FLJ54690, highly similar to Beta-secretase 1 (EC 3.4.23.46) (160); Beta-site APP-cleaving enzyme 1, isoform CRA_f (185); Beta-secretase 1 (285); KIAA1149 splice variant 1 (180); Beta-site APP-cleaving enzyme 1 (285); HSPC104 (48)
FRLELDKYIQGLK	0.61	0.1	Protein Njmu-R1 (171)
YSLQVLKNARAMA	0.67	0.08	Serine hydroxymethyltransferase (230); Serine hydroxymethyltransferase (335); Serine hydroxymethyltransferase 2 (Mitochondrial), isoform CRA_h (260); Serine hydroxymethyltransferase (287); Serine hydroxymethyltransferase (365); Serine hydroxymethyltransferase (294); Serine hydroxymethyltransferase, mitochondrial (356); Serine hydroxymethyltransferase (356); Serine hydroxymethyltransferase (332); …
QKNQEIKNMKLEL	0.41	0.08	A kinase (PRKA) anchor protein (Yotiao) 9 (386); A-kinase anchor protein 9 (386); Putative uncharacterized protein AKAP9 (371); AKAP9-BRAF fusion protein (374)
RINLAQKAFCGFE	0.44	0.1	Plectin-1 (4491); Similar to plectin 1, intermediate filament binding protein, 500kD (836)
VKVLVGKNFEDVA	0.3	0.17	cDNA FLJ45462 fis, clone BRSTN2011961, highly similar to Protein disulfide-isomerase (EC 5.3.4.1) (52); cDNA FLJ59033, highly similar to Protein disulfide-isomerase (EC 5.3.4.1) (318); cDNA FLJ59361, highly similar to Protein disulfide-isomerase (EC 5.3.4.1) (359); cDNA FLJ59430, highly similar to Protein disulfide-isomerase (EC 5.3.4.1) (319); Putative uncharacterized protein P4HB (162); Protein…
GVKSVTKIYNYYK	0.64	0.1	Transaldolase (219)
HASSGAKTLKKDR	0.38	0.12	Putative uncharacterized protein WDR48 (308); Putative uncharacterized protein WDR48 (20); WD repeat-containing protein 48 (578)
KRGQKRKSGYSLN	0.52	0.15	Bromodomain adjacent to zinc finger domain protein 2A (1746)
KCNKCGKAFSQKE	0.53	0.08	cDNA FLJ76854 (87); Zinc finger protein 260 (90)
RCRECGKSFSQKS	0.21	0.07	cDNA FLJ61031, weakly similar to Zinc finger protein 569 (346); Zinc finger protein 793 (346)
VGNIFIKNLDKSI	0.63	0.18	cDNA FLJ37875 fis, clone BRSSN2018771, highly similar to Poly(A)-binding protein 1 (104); cDNA FLJ51677, highly similar to Poly(A)-binding protein 5 (79); cDNA FLJ57246, highly similar to Poly(A)-binding protein 1 (59); Polyadenylate-binding protein 1 (104); Polyadenylate-binding protein 5 (111)
GIQQLVKETGVTK	0.44	0.14	Putative uncharacterized protein PNPT1 (264); Polyribonucleotide nucleotidyltransferase 1, mitochondrial (264)
ILQIMNKTISKPR	0.59	0.15	Polyribonucleotide nucleotidyltransferase 1, mitochondrial (591)
LNERLAKLSDGVA	0.45	0.11	Mitochondrial heat shock 60kD protein 1 variant 1 (396); cDNA FLJ54912, highly similar to 60 kDa heat shock protein, mitochondrial (373); cDNA FLJ54373, highly similar to 60 kDa heat shock protein, mitochondrial (387); cDNA FLJ51046, highly similar to 60 kDa heat shock protein, mitochondrial (340); 60 kDa heat shock protein, mitochondrial (396)
GHNSDGKFIARAQ	0.65	0.15	RCC2 protein (228); Protein RCC2 (293)
KGLGAKKGSLGAQ	0.73	0.24	ADP-ribosylation factor GTPase-activating protein 3 (229); ADP-ribosylation factor GTPase activating protein 3 (75); cDNA FLJ55728, highly similar to ADP-ribosylation factor GTPase-activating protein 3 (157); cDNA FLJ54156, highly similar to ADP-ribosylation factor GTPase-activating protein 3 (156); Putative uncharacterized protein ARFGAP3 (151)
EIPKEEKDPGMGA	0.17	0.07	Mitochondrial heat shock 60kD protein 1 variant 1 (554); cDNA FLJ54912, highly similar to 60 kDa heat shock protein, mitochondrial (531); cDNA FLJ54373, highly similar to 60 kDa heat shock protein, mitochondrial (545); cDNA FLJ51046, highly similar to 60 kDa heat shock protein, mitochondrial (498); 60 kDa heat shock protein, mitochondrial (554); Short heat shock protein 60 Hsp60s2 (239)
VVPGIIKTDFSKV	0.21	0.07	Dehydrogenase/reductase SDR family member 2 (197)
LKNNQSKFFRVLN	0.51	0.24	Putative uncharacterized protein CHD5 (858); Chromodomain helicase DNA binding protein 5 (374); cDNA FLJ34067 fis, clone FCBBF3001914, highly similar to Chromodomain helicase-DNA-binding protein 5 (EC 3.6.1.-) (374); cDNA FLJ16830 fis, clone UTERU3022536, highly similar to Chromodomain helicase-DNA-binding protein 4 (EC 3.6.1.-) (858); Chromodomain-helicase-DNA-binding protein 3 (894); Chromodoma…
VENFIQKQEKRIF	0.37	0.17	cDNA, FLJ93543, highly similar to Homo sapiens phosphotidylinositol transfer protein, beta (PITPNB),mRNA (215); cDNA FLJ41390 fis, clone BRCAN2024572, moderately similar to Phosphatidylinositol transfer protein beta isoform (26); Phosphatidylinositol transfer protein, beta, isoform CRA_a (217); Putative uncharacterized protein PITPNB (215); Phosphatidylinositol transfer protein beta isoform (215)
FVSFISKDSIQKS	0.62	0.1	3,2-trans-enoyl-CoA isomerase, mitochondrial (283); Dodecenoyl-Coenzyme A delta isomerase (3,2 trans-enoyl-Coenzyme A isomerase), isoform CRA_a (224)
DHTEVLKGIQKFP	0.06	0.03	Putative uncharacterized protein HMGCL (9); 3-hydroxymethyl-3-methylglutaryl-Coenzyme A lyase (Hydroxymethylglutaricaciduria), isoform CRA_b (68); cDNA FLJ53101, highly similar to Hydroxymethylglutaryl-CoA lyase, mitochondrial (EC 4.1.3.4) (93); 3-hydroxy-3-methylglutaryl-CoA lyase (34); Hydroxymethylglutaryl-CoA lyase, mitochondrial (93); cDNA, FLJ94502, highly similar to Homo sapiens 3-hydroxym…
DKRYIIKTITSED	0.3	0.09	cDNA FLJ53867, highly similar to Phosphatidylinositol-4-phosphate 5-kinase type-2 alpha (EC 2.7.1.68) (86); Phosphatidylinositol-5-phosphate 4-kinase type-2 alpha (145); Phosphatidylinositol-4-phosphate 5-kinase, type II, alpha (97)
EFVVLKKDVDAAY	0.67	0.15	cDNA FLJ46620 fis, clone TLUNG2000654, highly similar to Keratin, type II cytoskeletal 7 (175); cDNA FLJ60438, highly similar to Homo sapiens keratin protein K6irs (K6IRS2), mRNA (234); cDNA FLJ50908, highly similar to Homo sapiens keratin protein K6irs (K6IRS2), mRNA (46); Keratin, type II cytoskeletal 72 (234); Keratin, type II cytoskeletal 73 (241); Keratin, type II cytoskeletal 79 (253); Kera…
YVYKVLKQVHPDT	0.77	0.17	Histone H2B (47); Histone H2B type 1-B (47); Histone H2B type 1-C/E/F/G/I (47); Histone H2B type 1-D (47); Histone H2B type 1-H (47); Histone H2B type 1-J (47); Histone H2B type 1-K (47); Histone H2B type 1-L (47); Histone H2B type 1-M (47); Histone H2B type 1-N (47); Histone H2B type 1-O (47); Histone H2B type 2-E (47); Histone H2B type 2-F (47); Histone H2B type 3-B (47); Histone H2B type F-S (…
TAHSLFKRYRHEF	0.97	0.23	Cellular apoptosis susceptibility protein variant 2 (158); cDNA FLJ59343, highly similar to Exportin-2 (59); Exportin-2 (158)
AKLEALKDLASLS	0.7	0.11	Engulfment and cell motility 1, isoform CRA_c (105); cDNA FLJ54007, highly similar to Engulfment and cell motility protein 1(CED-12 homolog) (9); Putative uncharacterized protein ELMO1 (105); Engulfment and cell motility protein 1 (105)
YFDGNLKRYLKSE	0.76	0.17	cDNA PSEC0148 fis, clone PLACE1007202, highly similar to Protein disulfide-isomerase A3 (EC 5.3.4.1) (342); cDNA PSEC0175 fis, clone OVARC1000169, highly similar to Protein disulfide-isomerase A3 (EC 5.3.4.1) (337); cDNA FLJ53558, highly similar to Protein disulfide-isomerase A3 (EC 5.3.4.1) (362); Protein disulfide-isomerase A3 (362)
HRNSWAKAYNTLI	0.71	0.15	Putative uncharacterized protein CRAT (261); Carnitine O-acetyltransferase (261)
FRDEGGKAFFKGA	0.67	0.14	ADP/ATP translocase 3 (268); ADP,ATP carrier protein, liver isoform T2 variant (293); cDNA, FLJ92654, highly similar to Homo sapiens solute carrier family 25 (mitochondrial carrier; adenine nucleotide translocator), member 6 (SLC25A6), mRNA (268)
VAAAISKTAVAPI	0.57	0.12	ADP/ATP translocase 2 (23); cDNA, FLJ96310, highly similar to Homo sapiens solute carrier family 25 (mitochondrial carrier; adenine nucleotide translocator), member 5 (SLC25A5), mRNA (23); SLC25A5 protein (48)
RFATYTKENGRTL	0.68	0.12	JMJD1B protein (151); Lysine-specific demethylase 3B (361)
GSNYSVKTVEKTW	0.75	0.13	cDNA, FLJ93596, highly similar to Homo sapiens sulfide quinone reductase-like (yeast) (SQRDL), mRNA (173); Sulfide dehydrogenase like (173); PRO1975 (116); Sulfide:quinone oxidoreductase, mitochondrial (173)
PSMMKIKIIAPPE	0.99	0.16	NA
FLTFINKLDRMGS	0.42	0.09	Putative uncharacterized protein GFM1 (175); Elongation factor G, mitochondrial (175)
KVIIVVKDGPGFY	0.5	0.13	cDNA FLJ53969, highly similar to Trifunctional enzyme subunit alpha, mitochondrial (350); cDNA FLJ54509, highly similar to Trifunctional enzyme subunit alpha, mitochondrial (494); Trifunctional enzyme subunit alpha, mitochondrial (540); Putative uncharacterized protein HADHA (314)
SIINGYKRVLALS	0.72	0.15	cDNA FLJ75549, highly similar to Homo sapiens ribosomal protein, large, P0 (RPLP0), transcript variant 1, mRNA (246); cDNA FLJ51469, highly similar to 60S acidic ribosomal protein P0 (195); RPLP0 protein (184); RPLP0 protein (86); Ribosomal protein P0 variant (246); RPLP0 protein (183); 60S acidic ribosomal protein P0 (246); 60S acidic ribosomal protein P0-like (246)
FSAAGFKDIRSYR	0.76	0.14	Aspartate aminotransferase, cytoplasmic (154); Aspartate aminotransferase (107); Aspartate aminotransferase (133); Aspartate aminotransferase (154)
SRYQQFKDFQRRI	0.82	0.09	HLA-B associated transcript 1 (97); HLA-B associated transcript 1 (233); HCG2005638, isoform CRA_c (256); cDNA FLJ55484, highly similar to ATP-dependent RNA helicase DDX39 (EC 3.6.1.-) (376); ATP-dependent RNA helicase DDX39 (333); HLA-B associated transcript 1 (334); Putative uncharacterized protein DKFZp547B159 (89); Spliceosome RNA helicase BAT1 (334)
RNALYIKSSKISR	0.33	0.1	Ubiquitin carboxyl-terminal hydrolase (278); Ubiquitin carboxyl-terminal hydrolase (351); Ubiquitin carboxyl-terminal hydrolase (313); cDNA FLJ38197 fis, clone FCBBF1000367, highly similar to Ubiquitin carboxyl-terminal hydrolase 14 (EC 3.1.2.15) (278); Ubiquitin carboxyl-terminal hydrolase (302); Ubiquitin carboxyl-terminal hydrolase 14 (313)
YKNYEKKLSKKWI	0.76	0.16	Uncharacterized protein C8orf48 (82)
ENPLQFKFRAKFY	1.05	0.18	cDNA, FLJ92973, highly similar to Homo sapiens villin 2 (ezrin) (VIL2), mRNA (79); cDNA FLJ54141, highly similar to Ezrin (47); Ezrin (79)
IIHSLKKCDISLQ	0.87	0.12	ATP-dependent DNA helicase 2 subunit 2 (156); Putative uncharacterized protein XRCC5 (156)
NDKSDWKVVRKAL	0.94	0.16	cDNA FLJ53573, highly similar to Myosin Ic (261); cDNA FLJ52405, highly similar to Myosin Ic (250); Myosin-Ic (285)
SEVPTPKRPRGRP	1.31	0.24	cDNA FLJ54188, moderately similar to High mobility group protein HMG-I/HMG-Y (55); Putative uncharacterized protein HMGA1 (55); High mobility group protein HMG-I/HMG-Y (55); High mobility group AT-hook 1 (44); HMGA1 protein (44)
TPETAEKLARDLK	1.15	0.2	cDNA FLJ55107, highly similar to Cell division control protein 42 homolog (186); cDNA FLJ54776, highly similar to Cell division control protein 42 homolog (189); cDNA, FLJ79348, highly similar to Cell division control protein 42 homolog (186); Cell division control protein 42 homolog (144)
SNASTTKYPQSPT	0.71	0.11	Glutamate [NMDA] receptor subunit epsilon-2 (1280); Glutamate [NMDA] receptor subunit epsilon 2 variant (932)
ZZZMGRKKIQITR	1.08	0.19	cDNA, FLJ92829, highly similar to Homo sapiens MADS box transcription enhancer factor 2, polypeptide C (myocyte enhancer factor 2C) (MEF2C), mRNA (7); cDNA FLJ50129, highly similar to Myocyte-specific enhancer factor 2A (7); Putative uncharacterized protein MEF2C (7); Myocyte-specific enhancer factor 2A (7); Myocyte-specific enhancer factor 2C (7); MADS box transcription enhancer factor 2, polype…
DQEALMKSVKLLQ	0.98	0.15	cDNA FLJ57836, highly similar to Myb-binding protein 1A (158); Myb-binding protein 1A (158)
RMKETQKSIYYIT	0.77	0.16	cDNA FLJ77842 (119); cDNA FLJ53619, highly similar to Heat shock protein HSP 90-beta (471); cDNA FLJ54023, highly similar to Heat shock protein HSP 90-beta (443); Heat shock protein HSP 90-beta (481); Heat shock protein 90kDa alpha (Cytosolic), class B member 1 (106); cDNA: FLJ21717 fis, clone COL10322 (119)
SELFSQKTKASLL	0.82	0.16	Hydroxymethylglutaryl-CoA synthase, cytoplasmic (330); 3-hydroxy-3-methylglutaryl-Coenzyme A synthase 1 (Soluble) (330); cDNA FLJ38173 fis, clone FCBBF1000053, highly similar to HYDROXYMETHYLGLUTARYL-COA SYNTHASE, CYTOPLASMIC (319)
CAENTAKKLNIAR	0.6	0.12	Acetyl-CoA acetyltransferase, mitochondrial (202)
DGVDFGKWRAVLR	0.62	0.13	Fructose-bisphosphate aldolase (147); Fructose-bisphosphate aldolase B (147); Fructose-bisphosphate aldolase (78); Fructose-bisphosphate aldolase (74)
LSNNPSKGLALGI	0.63	0.16	cDNA FLJ51785, highly similar to Glutathione synthetase (EC 6.3.2.3) (117); cDNA FLJ50601, highly similar to Glutathione synthetase (EC 6.3.2.3) (58); Glutathione synthetase (186)
NISAKEKEEEERE	0.97	0.29	Putative uncharacterized protein FSIP2 (445); Uncharacterized protein FLJ44048 (445)
NKICQFKLVLLGE	1.14	0.3	cDNA FLJ51867, highly similar to Ras-related protein Rab-5A (22); Putative uncharacterized protein RAB5A (22); cDNA, FLJ93000, Homo sapiens RAB5A, member RAS oncogene family (RAB5A), mRNA (22); Ras-related protein Rab-5A (22); Ras-related protein Rab-5C (23)
LYYTGEKGQNQDY	0.67	0.13	Nucleolin, isoform CRA_c (293); cDNA FLJ38578 fis, clone HCHON2007674, highly similar to NUCLEOLIN (390); Putative uncharacterized protein NCL (68); Nucleolin (467); cDNA FLJ45706 fis, clone FEBRA2028457, highly similar to Nucleolin (360); NCL protein (239)
QKDLLFKDSAIGF	0.71	0.16	cDNA FLJ78440, highly similar to Human lactoferrin (321); cDNA FLJ75480, highly similar to Human lactoferrin (321); Lactoferrin (321); Truncated lactoferrin (321); cDNA FLJ36533 fis, clone TRACH2004428, highly similar to Lactotransferrin (EC 3.4.21.-) (308); cDNA FLJ58679, highly similar to Lactotransferrin (EC 3.4.21.-) (276); cDNA, FLJ79229, highly similar to Lactotransferrin (EC 3.4.21.-) (276…
LKELIQKELTIGS	0.74	0.17	cDNA, FLJ92369, highly similar to Homo sapiens S100 calcium binding protein A6 (calcyclin) (S100A6),mRNA (40); Protein S100-A6 (40)
PVLLLGKERFADV	0.74	0.17	NA
FARIWTKDGNLAS	0.69	0.14	cDNA FLJ55712, highly similar to F-box-like/WD repeat protein TBL1XR1 (116); F-box-like/WD repeat-containing protein TBL1XR1 (254)
FKTAYGKDLIKDL	0.81	0.16	Annexin A11 (248); cDNA FLJ51518, highly similar to Annexin A11 (154); cDNA FLJ58379, highly similar to Annexin A11 (215); cDNA FLJ55482, highly similar to Annexin A11 (348); Annexin A11 variant (253); Annexin A11, isoform CRA_b (248); Annexin A11 variant (248)
ALNFAFKDKYKQI	0.63	0.16	ADP/ATP translocase 2 (92); ADP/ATP translocase 3 (92); cDNA, FLJ96310, highly similar to Homo sapiens solute carrier family 25 (mitochondrial carrier; adenine nucleotide translocator), member 5 (SLC25A5), mRNA (92); ADP/ATP translocase (44); ADP,ATP carrier protein, liver isoform T2 variant (117); cDNA, FLJ92654, highly similar to Homo sapiens solute carrier family 25 (mitochondrial carrier; ade…
LQDRNEKLFYRVL	0.63	0.11	Malic enzyme (84); Malic enzyme (119); Malic enzyme (9); NADP-dependent malic enzyme, mitochondrial (119); NADP-dependent malic enzyme (84); Malic enzyme (57)
TDFYHSKRRLIFS	0.42	0.29	cDNA FLJ54803, highly similar to Cyclin-dependent kinase inhibitor 1 (188); Cyclin-dependent kinase inhibitor 1 (154); Cyclin-dependent kinase variant (181); Cyclin-dependent kinase inhibitor 1A (P21, Cip1), isoform CRA_a (154)
RGTYHNKSFFTDD	0.52	0.09	cDNA, FLJ92068, highly similar to Homo sapiens Rho GDP dissociation inhibitor (GDI) beta (ARHGDIB),mRNA (175); Rho GDP-dissociation inhibitor 2 (175)
EVQKDIKNVPFKI	0.53	0.09	cDNA FLJ51811, highly similar to Stress-70 protein, mitochondrial (69); cDNA FLJ51907, highly similar to Stress-70 protein, mitochondrial (124); Stress-70 protein, mitochondrial (138); HSPA9 protein (140)
TGVPGKKCGTILL	0.58	0.11	Copine family member IX (132); Putative uncharacterized protein CPNE9 (131); Copine-9 (132)
LIWTNDKTTADPF	0.48	0.11	cDNA FLJ75353, highly similar to Homo sapiens synaptotagmin XII (SYT12), mRNA (316); cDNA FLJ77747, highly similar to Homo sapiens synaptotagmin XII (SYT12), mRNA (316); cDNA, FLJ79459, highly similar to Synaptotagmin-12 (316); Putative uncharacterized protein DKFZp434D2429 (256); Synaptotagmin-12 (316)
MRAVEFKVVETDP	0.41	0.07	Putative uncharacterized protein VCP (119); Valosin-containing protein (102); Transitional endoplasmic reticulum ATPase (164)
DTCRSLKYPYVAV	0.54	0.05	COMM domain containing 6 (54); COMM domain-containing protein 6 (39)
EGVMVAKKDVHMP	0.56	0.1	Ribosomal protein S10 variant (33); Ribosomal protein S10 (24); 40S ribosomal protein S10 (24); Putative 40S ribosomal protein S10-like (24)
VLAIHGKQKQNKR	0.65	0.21	Putative uncharacterized protein DDX18 (122); ATP-dependent RNA helicase DDX18 (458); Putative uncharacterized protein DDX18 (334); Putative uncharacterized protein (118); cDNA FLJ33908 fis, clone CTONG2008518, highly similar to DEAD/H (Asp-Glu-Ala-Asp/His) box polypeptide 18 (196)
EKLLHEKLRFSGV	0.61	0.11	Putative uncharacterized protein ZMYM3 (647); Zinc finger MYM-type protein 3 (645)
AKLQDFKSFLLKD	0.67	0.11	Serine hydroxymethyltransferase (343); Serine hydroxymethyltransferase (448); Serine hydroxymethyltransferase 2 (Mitochondrial), isoform CRA_h (373); Serine hydroxymethyltransferase (400); Serine hydroxymethyltransferase (395); Serine hydroxymethyltransferase (478); Serine hydroxymethyltransferase (407); Serine hydroxymethyltransferase, mitochondrial (469); Serine hydroxymethyltransferase (469); …
VADSKKKGHKNNV	0.47	0.09	cDNA FLJ77253, highly similar to Homo sapiens nuclear receptor interacting protein 1 (NRIP1), mRNA (963); Nuclear receptor-interacting protein 1 (963)
IEPGYFKTAVTSK	0.42	0.09	Microsomal NAD+-dependent retinol dehydrogenase 4 variant (86); Retinol dehydrogenase 16 (210)
QLYLLEKEKKALE	0.59	0.1	cDNA FLJ61706, highly similar to Colorectal mutant cancer protein (641); Colorectal mutant cancer protein (641); Putative uncharacterized protein DKFZp686J1286 (641)
SLDEIEKLTYIDK	0.55	0.1	cDNA FLJ75245, highly similar to Homo sapiens carbamoyl-phosphate synthetase 1, mitochondrial (CPS1), mRNA (869); Carbamoyl-phosphate synthase [ammonia], mitochondrial (869); Putative uncharacterized protein CPS1 (869); Carbamoyl-phosphate synthetase 1 variant (879); Carbamoylphosphate synthetase I (869)
DLKFRQKVNLESN	0.52	0.1	Putative uncharacterized protein CNTLN (1158); Centlein (1158)
FSIEDLKAQPKQT	0.7	0.17	Thymocyte nuclear protein 1 (81)
RFALVPKLVKEEV	0.46	0.11	cDNA, FLJ95525, highly similar to Homo sapiens synapse associated protein 1, SAP47 homolog (Drosophila) (SYAP1), mRNA (191); cDNA FLJ60548, highly similar to Synapse-associated protein 1 (25); cDNA FLJ52963, highly similar to Synapse-associated protein 1 (157); SYAP1 protein variant (191); Synapse-associated protein 1 (191)
DGSDEKKKLYCIY	0.64	0.1	ATP synthase subunit alpha (190); ATP synthase subunit alpha, mitochondrial (240); ATP synthase subunit alpha (218)
KGYQWLKDKVQSE	0.55	0.09	Voltage-gated potassium channel subunit beta-3 (315)
SDDKTLKIWDVSS	0.6	0.08	WD repeat-containing protein 5 (112)
EQAEIYKSKLKEE	0.77	0.16	Meiosis-specific nuclear structural 1, isoform CRA_a (201); Meiosis-specific nuclear structural protein 1 (333)
FAADAVKLERMLT	0.61	0.14	Transaldolase (20); Transaldolase (321)
HESDSKKSEDLSL	0.57	0.13	Toll-like receptor adapter molecule 2 (TICAM-2) (Putative NF-kappa-B- activating protein 502). (205); TIR domain-containing adapter molecule 2 (36)
DLKMDCKEYNYDK	0.57	0.12	cDNA FLJ90568 fis, clone OVARC1001570, highly similar to Beta-secretase 1 (EC 3.4.23.46) (205); cDNA FLJ54690, highly similar to Beta-secretase 1 (EC 3.4.23.46) (154); Beta-site APP-cleaving enzyme 1, isoform CRA_f (179); Beta-secretase 1 (279); KIAA1149 splice variant 1 (174); Beta-site APP-cleaving enzyme 1 (279); HSPC104 (42)
ILGTTLKDEGKLL	0.47	0.08	Putative uncharacterized protein WDR1 (481); cDNA FLJ45763 fis, clone N1ESE2000698, highly similar to WD repeat protein 1 (445); cDNA FLJ58303, highly similar to WD repeat protein 1 (315); WD repeat domain 1, isoform CRA_a (480); WD repeat-containing protein 1 isoform 1 variant (480); WD repeat-containing protein 1 isoform 1 variant (498); WD repeat-containing protein 1 (480)
DLKLDFKDVLLRP	0.7	0.1	GMP reductase 1 (13)
LVDTGDKFRFFSM	0.63	0.1	Spectrin, beta, non-erythrocytic 1, isoform CRA_d (1913); Spectrin beta chain, brain 1 (1913)
MEPPRFKINKKIP	0.55	0.11	cDNA FLJ59238, highly similar to SNW domain-containing protein 1 (213); cDNA FLJ51388, highly similar to SNW domain-containing protein 1 (138); cDNA, FLJ78986, highly similar to SNW domain-containing protein 1 (138); SNW1 protein (213); SNW domain-containing protein 1 (213)
TLMDGLKQRAHVI	0.37	0.11	VCP protein (174); Valosin-containing protein (274); Transitional endoplasmic reticulum ATPase (336)
GDTVLLKGKKRRE	0.65	0.09	Putative uncharacterized protein VCP (15); Transitional endoplasmic reticulum ATPase (60)
LWVIEAKDLPAKK	0.64	0.17	DAB2 interacting protein (195); DAB2 interacting protein (132); Disabled homolog 2-interacting protein (223); DAB2 interacting protein (99)
SGLNSEKVAALIQ	0.67	0.14	Bleomycin hydrolase (10)
VVAVAEKREKLAN	0.48	0.16	Selenoprotein H (20)
ELKRKKKWNLEIS	0.68	0.1	Putative uncharacterized protein FCGR1C (136); High affinity immunoglobulin gamma Fc receptor IB (228); Putative high affinity immunoglobulin gamma Fc receptor IC (228)
TTPRRNKLDHYAI	0.57	0.08	Putative uncharacterized protein DKFZp547I014 (70)
AANWKYKYGYEIP	0.73	0.09	cDNA, FLJ79122, highly similar to Proteasome subunit alpha type 6 (EC 3.4.25.1) (25); Proteasome (Prosome, macropain) subunit, alpha type, 6, isoform CRA_a (85); Proteasome subunit alpha type-6 (104)
FSLLNAKREETKA	0.91	0.15	Putative uncharacterized protein SPOPL (110); Speckle-type POZ protein-like (110)
KLRMLFKDDYPSS	0.8	0.16	Ubiquitin carrier protein (65); SUMO-conjugating enzyme UBC9 (65)
GIGHRVKSINNPD	0.92	0.16	ATP-citrate synthase (978); cDNA FLJ56442, highly similar to ATP-citrate synthase (EC 2.3.3.8) (1022); cDNA FLJ55447, highly similar to ATP-citrate synthase (EC 2.3.3.8) (707); ACLY variant protein (1014); cDNA FLJ37765 fis, clone BRHIP2024742, highly similar to ATP-CITRATE (578)
ISELNGKNIEDVI	0.94	0.18	cDNA, FLJ92222, Homo sapiens ribosomal protein, large P2 (RPLP2), mRNA (49); 60S acidic ribosomal protein P2 (49)
ITEKMAKAIREWY	0.78	0.14	cDNA, FLJ95788, highly similar to Homo sapiens CXXC finger 1 (PHD domain) (CXXC1), mRNA (63); cDNA FLJ59001, highly similar to CpG-binding protein (63); CpG-binding protein (63)
TEEKYKKINEEFD	0.93	0.14	Putative uncharacterized protein MEF2C (117); Myocyte-specific enhancer factor 2A (117)
LGFKTPKEAIEGT	0.62	0.16	40S ribosomal protein S11 (48)
LWLTKTKLIEGLP	0.74	0.14	39S ribosomal protein L37, mitochondrial (127)
GLGGGGKWKREEG	0.45	0.11	Choline O-acetyltransferase (16); Choline acetyltransferase (16)
HLQRHLKGQNCLE	0.66	0.15	cDNA FLJ77991, highly similar to Homo sapiens zinc finger and BTB domain containing 7B, mRNA (450); cDNA FLJ55472, highly similar to Zinc finger and BTB domain-containing protein7B (484); Zinc finger and BTB domain-containing protein 7B (450)
LEKAGQKLIDVNH	0.67	0.11	Putative uncharacterized protein SPTAN1 (637); cDNA FLJ59116, highly similar to Spectrin alpha chain, brain (637); cDNA FLJ61399, highly similar to Spectrin alpha chain, brain (637); Spectrin alpha chain, brain (637)
QASDLEKIHLDEK	0.63	0.09	Transaldolase (286)
LKHTWQKANDQFL	0.54	0.1	cDNA, FLJ94906, highly similar to Homo sapiens rabaptin-5 (RAB5EP), mRNA (282); cDNA FLJ60304, highly similar to Rab GTPase-binding effector protein 1 (239); RABEP1 protein (275); Rab GTPase-binding effector protein 1 (282)
GKKEGAKLECGGG	0.57	0.11	Retinal dehydrogenase 1 (367); cDNA FLJ51786, highly similar to Retinal dehydrogenase 1 (EC 1.2.1.36) (288); cDNA FLJ50286, highly similar to Retinal dehydrogenase 1 (EC 1.2.1.36) (292)
IKNVPFKIVRASN	0.59	0.1	cDNA FLJ51811, highly similar to Stress-70 protein, mitochondrial (74); cDNA FLJ51907, highly similar to Stress-70 protein, mitochondrial (129); Stress-70 protein, mitochondrial (143); Heat shock 70 kDa protein 9B (11); HSPA9 protein (145)
DRSRLVKQMEDKV	0.55	0.1	Cingulin-like protein 1 (1064)
SGGDSLKSIRLLS	0.59	0.14	Acyl-CoA synthetase family member 4 (591); cDNA FLJ60483, highly similar to Homo sapiens 2-aminoadipic 6-semialdehyde dehydrogenase (AASDH), mRNA (106); cDNA FLJ51442, highly similar to Homo sapiens 2-aminoadipic 6-semialdehyde dehydrogenase (AASDH), mRNA (438); cDNA FLJ54663, highly similar to Homo sapiens 2-aminoadipic 6-semialdehyde dehydrogenase (AASDH), mRNA (591)
DRFSSLKGVPTEV	0.64	0.11	Putative uncharacterized protein HAUS7 (88); cDNA FLJ55080, moderately similar to 26S proteasome-associated UCH37-interacting protein 1 (157); cDNA FLJ56721, highly similar to 26S proteasome-associated UCH37-interacting protein 1 (88); cDNA FLJ60944, highly similar to Homo sapiens 26S proteasome-associated UCH interacting protein 1 (UIP1), transcript variant 3, mRNA (88); HAUS augmin-like complex…
PIGCDAKGRIVLG	0.45	0.09	Aryl hydrocarbon receptor (303)
DLSEALKEATKEV	0.6	0.08	Heme oxygenase (Decycling) 1 (18); cDNA, FLJ93605, highly similar to Homo sapiens heme oxygenase (decycling) 1 (HMOX1), mRNA (18); HMOX1 (18); Heme oxygenase 1 (18)
ZZMAAVKTLNPKA	0.87	0.13	Putative uncharacterized protein CCT6A (7); cDNA, FLJ94440, highly similar to Homo sapiens chaperonin containing TCP1, subunit 6A (zeta 1)(CCT6A), mRNA (7); T-complex protein 1 subunit zeta (7)
NYRYYFKKASDEF	0.44	0.07	Axin-2 (806); AXIN2 protein (741); Putative uncharacterized protein DKFZp781B0869 (806)
EVGGLVKALRLFQ	0.42	0.07	Tryptophan hydroxylase 2 (44); Tryptophan hydroxylase 2 (79); TPH2 protein (85); cDNA FLJ37295 fis, clone BRAMY2015311, moderately similar to TRYPTOPHAN 5-MONOOXYGENASE (EC 1.14.16.4) (79); Tryptophan 5-hydroxylase 2 (79)
YKEEGLKAFYKGV	0.61	0.15	cDNA, FLJ96465, highly similar to Homo sapiens solute carrier family 25 (mitochondrial carrier;phosphate carrier), member 3 (SLC25A3), nuclear gene encodingmitochondrial protein, transcript variant 1b, mRNA (213); Phosphate carrier protein, mitochondrial (214); Solute carrier family 25 member 3 isoform b variant (213); cDNA FLJ90278 fis, clone NT2RP1000325, highly similar to Phosphate carrier pro…
YQFTGIKKYFNSY	0.5	0.08	Up-regulated during skeletal muscle growth protein 5 (16)
KISAYMKSSRFLP	0.72	0.15	Putative uncharacterized protein GSTM2 (218); Putative uncharacterized protein GSTM1 (130); Glutathione S-transferase Mu 1 (199); Glutathione S-transferase Mu 2 (199); Glutathione S-transferase Mu 4 (199); Glutathione S-transferase mu 2 (Muscle) (199); GSTM4_SV5 (138)
YGFGMVKIDLKTK	0.64	0.1	Voltage-dependent anion-selective channel protein 3 (28)
LKNKVTKEQYNML	0.08	0.03	Desmoglein-1 (450)
KGKGKGKARAGQG	0.32	0.08	NA
SSSSKGKKSRTQK	0.39	0.13	Inhibitor of growth family, member 4, isoform CRA_g (129)
LKDEKEKLLKEKG	0.64	0.35	cDNA FLJ51002, highly similar to Nuclear factor erythroid 2-related factor 2 (522); cDNA FLJ51196, highly similar to Nuclear factor erythroid 2-related factor 2 (515); cDNA, FLJ79047, highly similar to Nuclear factor erythroid 2-related factor 2 (522); Nuclear factor erythroid 2-related factor 2 (538)
VYRHFGKAPGTPH	0.47	0.18	Ribosomal protein L18 (131); 60S ribosomal protein L18 (154)
LKSLLGKDVLFLK	0.21	0.06	Phosphoglycerate kinase (91); Phosphoglycerate kinase (63); Phosphoglycerate kinase 1 (91); Phosphoglycerate kinase 2 (91)
RHQVHEKEEFKAL	0.78	0.3	Neurofibromin (1581); Neurofibromin variant (610)
TGIGMTKADLINN	0.6	0.17	cDNA FLJ53619, highly similar to Heat shock protein HSP 90-beta (95); cDNA FLJ54023, highly similar to Heat shock protein HSP 90-beta (95); cDNA FLJ57431, highly similar to Heat shock protein HSP 90-alpha (100); Putative uncharacterized protein ENSP00000371882 (95); Putative heat shock protein HSP 90-beta 2 (95); Putative heat shock protein HSP 90-beta-3 (95); Putative heat shock protein HSP 90-b…
ISESFQKALEKGI	0.72	0.12	T-complex protein 1 subunit delta (139); T-complex protein 1 subunit delta (114); T-complex protein 1 subunit delta (83); T-complex protein 1 subunit delta (109)
MIIEEAKRSLHDA	0.55	0.12	cDNA FLJ78433, highly similar to Homo sapiens chaperonin containing TCP1, subunit 5 (epsilon) (CCT5), mRNA (399); cDNA FLJ50442, highly similar to T-complex protein 1 subunit epsilon (361); cDNA FLJ51711, highly similar to T-complex protein 1 subunit epsilon (324); cDNA FLJ58784, highly similar to T-complex protein 1 subunit epsilon (378); cDNA FLJ54333, highly similar to T-complex protein 1 subu…
ARKDLEKLVRKVL	1.02	0.25	Rho guanine nucleotide exchange factor (GEF) 7 (686); cDNA FLJ56152, highly similar to Rho guanine nucleotide exchange factor 7 (702); ARHGEF7 protein (8)
DLIDFDKLKKSNA	0.47	0.09	Spectrin, beta, non-erythrocytic 1, isoform CRA_d (224); Spectrin beta chain, brain 1 (224)
MKIMVIKDIERED	0.49	0.1	T-complex protein 1 subunit delta (326); T-complex protein 1 subunit delta (301); T-complex protein 1 subunit delta (176); T-complex protein 1 subunit delta (270); T-complex protein 1 subunit delta (296)
LKSPDVKAVLAVL	0.56	0.1	Dynein heavy chain 5, axonemal (310)
SAPRRNKLDHYAI	0.33	0.1	Ribosomal protein L23a, isoform CRA_a (108); Putative uncharacterized protein RPL23A (72); Putative uncharacterized protein ENSP00000415110 (72); 60S ribosomal protein L23a (70)
GKTLLAKAIANEC	0.19	0.06	VCP protein (198); VCP protein (367); Valosin-containing protein (157); Putative uncharacterized protein DKFZp434K0126 (154); Transitional endoplasmic reticulum ATPase (529)
HSQELLKIKTEPV	0.44	0.06	Zinc finger protein PLAGL2 (248)
RRIEFYKESKQQA	0.97	0.24	cDNA FLJ56761, highly similar to Homo sapiens Rho GTPase activating protein 15 (ARHGAP15), mRNA (118); Putative uncharacterized protein ARHGAP15 (118); Rho GTPase-activating protein 15 (118)
YKPPPQKSLKELQ	0.81	0.13	cDNA, FLJ92068, highly similar to Homo sapiens Rho GDP dissociation inhibitor (GDI) beta (ARHGDIB),mRNA (30); Rho GDP-dissociation inhibitor 2 (30)
HKDHFTKLAVEAV	0.33	0.07	cDNA FLJ75037, highly similar to Homo sapiens chaperonin containing TCP1, subunit 2 (beta) (CCT2),mRNA (181); T-complex protein 1 subunit beta (181); cDNA FLJ50480, highly similar to T-complex protein 1 subunit beta (134); cDNA FLJ50585, highly similar to T-complex protein 1 subunit beta (120); cDNA FLJ52359, highly similar to T-complex protein 1 subunit beta (134); Chaperonin containing TCP1, su…
KLNEKEKELCQMV	0.6	0.13	cDNA FLJ39052 fis, clone NT2RP7011721, highly similar to Transcriptional adapter 2 (280); Transcriptional adapter 2-alpha (381)
KIFWGGKAETERG	0.53	0.1	cDNA FLJ77679, highly similar to Homo sapiens potassium voltage-gated channel, shaker-related subfamily, beta member 2 (KCNAB2), transcript variant 1, mRNA (124); cDNA, FLJ79460, highly similar to Voltage-gated potassium channel subunitbeta-2 (102); cDNA, FLJ79507, highly similar to Voltage-gated potassium channel subunitbeta-2 (57); cDNA, FLJ92727, highly similar to Homo sapiens potassium voltag…
LPLNIDKADTGKN	0.58	0.11	cDNA FLJ75249, highly similar to Human retinal pigment epithelium-specific 61 kDa protein (RPE65) mRNA (376); Retinoid isomerohydrolase (376)
MIGAGSKDAGTLN	0.42	0.14	cDNA FLJ77226, highly similar to Homo sapiens p21 activated kinase 1B (PAK1B) mRNA (29); cDNA FLJ30666 fis, clone FCBBF1000627, highly similar to Serine/threonine-protein kinase PAK 1 (EC 2.7.11.1) (29); Serine/threonine-protein kinase PAK 1 (29)
ALHFLNKMKIMVI	0.52	0.07	T-complex protein 1 subunit delta (319); T-complex protein 1 subunit delta (294); T-complex protein 1 subunit delta (169); T-complex protein 1 subunit delta (263); T-complex protein 1 subunit delta (289)
YFSSNGKLEEVKT	0.45	0.08	cDNA FLJ78763 (607); cDNA FLJ34845 fis, clone NT2NE2011221, highly similar to Homo sapiens cell division cycle associated 2 (CDCA2), mRNA (21); Cell division cycle-associated protein 2 (623)
LDIDVEKLTQAEL	0.34	0.12	cDNA FLJ60339, highly similar to Phosphatidylinositol-4-phosphate 3-kinase C2 domain-containing alpha polypeptide (EC 2.7.1.154) (94); cDNA FLJ61072, highly similar to Phosphatidylinositol-4-phosphate 3-kinase C2 domain-containing alpha polypeptide (EC 2.7.1.154) (94); Phosphatidylinositol-4-phosphate 3-kinase C2 domain-containing subunit alpha (94)
AEASSPKGKFSLF	0.48	0.1	Neuroblast differentiation-associated protein AHNAK (5765); Putative uncharacterized protein AHNAK (2835)
EKILCHKFMRFMM	0.4	0.2	Actin-related protein 2/3 complex subunit 4 (89); Putative uncharacterized protein ARPC4 (89); Putative uncharacterized protein ARPC4 (108)
FEQKLYKEKEEML	0.73	0.1	Usher syndrome 1C (Autosomal recessive, severe), isoform CRA_b (451)
NLETKYKVCNYGL	0.58	0.1	Voltage-dependent anion-selective channel protein 3 (63)
LSTAILKQKNRPN	0.6	0.13	Transitional endoplasmic reticulum ATPase (18)
VFEAAVKSIKAAS	0.42	0.07	cDNA FLJ90568 fis, clone OVARC1001570, highly similar to Beta-secretase 1 (EC 3.4.23.46) (233); cDNA FLJ54690, highly similar to Beta-secretase 1 (EC 3.4.23.46) (182); Beta-site APP-cleaving enzyme 1, isoform CRA_f (207); Beta-secretase 1 (307); KIAA1149 splice variant 1 (202); Beta-site APP-cleaving enzyme 1 (307); Beta-site APP-cleaving enzyme (11); HSPC104 (70)
YLFTGLKLRLQEE	0.49	0.1	Ubiquitin carboxyl-terminal hydrolase (256); Ubiquitin carboxyl-terminal hydrolase (329); Ubiquitin carboxyl-terminal hydrolase (291); cDNA FLJ38197 fis, clone FCBBF1000367, highly similar to Ubiquitin carboxyl-terminal hydrolase 14 (EC 3.1.2.15) (256); Ubiquitin carboxyl-terminal hydrolase (280); Ubiquitin carboxyl-terminal hydrolase 14 (291)
PVQYGQKPEGRTV	1.18	0.21	Putative uncharacterized protein EP400 (1436); EP400 protein (1436); Putative uncharacterized protein EP400 (1435); Putative uncharacterized protein EP400 (1399); E1A-binding protein p400 (1472)
SATMSDKPDMAEI	1.34	0.3	TMSB4X protein (30); TMSB4X protein (29); TMSB4X protein (23); TMSB4X protein (25)
DGRKMSKKKTAVK	0.51	0.13	cDNA FLJ75353, highly similar to Homo sapiens synaptotagmin XII (SYT12), mRNA (336); cDNA FLJ77747, highly similar to Homo sapiens synaptotagmin XII (SYT12), mRNA (336); cDNA, FLJ79459, highly similar to Synaptotagmin-12 (336); Putative uncharacterized protein DKFZp434D2429 (276); Synaptotagmin-12 (336)
IMKFICKDFWTTV	0.9	0.17	Trafficking protein particle complex subunit 6B (70)
KIYQMLKNLLQLS	0.6	0.11	cDNA FLJ61095, highly similar to Ubiquitin conjugation factor E4 A (386); Ubiquitin conjugation factor E4 A (386)
AATAAEKYKHRGE	0.88	0.24	cDNA FLJ75240, highly similar to Homo sapiens methyl CpG binding protein 2 (MECP2) mRNA (449); Putative uncharacterized protein MECP2 (448); Methyl CpG binding protein 2 (33); Mutant methyl CpG binding protein 2 transcript variant 1 (449); Methyl CpG binding protein 2 isoform 1 (449); Methyl-CpG-binding protein 2 (449); Methyl CpG binding protein 2 variant (93)
FSSSTNKEKKKQK	0.78	0.11	cDNA FLJ55367, highly similar to Rattus norvegicus SDA1 domain containing 1 (Sdad1), mRNA (606); Putative uncharacterized protein SDAD1 (546); Protein SDA1 homolog (643)
SGAKTLKKDRLSA	0.95	0.16	Putative uncharacterized protein WDR48 (311); Putative uncharacterized protein WDR48 (23); WD repeat-containing protein 48 (581)
CGKGFAKQCKLTE	0.85	0.21	cDNA FLJ61318, weakly similar to Zinc finger protein Kr18 (399); ZNF786 protein (407); Zinc finger protein 786 (436)
DSVTECKQPPVSS	0.84	0.13	cDNA FLJ33557 fis, clone BRAMY2009489, highly similar to Homo sapiens SPHK1 (sphingosine kinase type 1) interacting protein (SKIP), mRNA (411); A-kinase anchor protein SPHKAP (1380)
ZMDVFMKGLSMAK	0.69	0.13	Beta-synuclein (7)
HVLEEAKKPRVMG	0.57	0.15	Histone acetyltransferase KAT2B (441)
VPVPQLKSFQKIQ	0.76	0.12	Putative uncharacterized protein RPS7 (70); cDNA, FLJ92055, Homo sapiens ribosomal protein S7 (RPS7), mRNA (70); 40S ribosomal protein S7 (70)
GVPTEVKIQEMTK	0.72	0.11	Putative uncharacterized protein HAUS7 (95); cDNA FLJ56721, highly similar to 26S proteasome-associated UCH37-interacting protein 1 (95); cDNA FLJ60944, highly similar to Homo sapiens 26S proteasome-associated UCH interacting protein 1 (UIP1), transcript variant 3, mRNA (95); HAUS augmin-like complex subunit 7 (105)
ASKFAQKIGGSER	0.87	0.13	cDNA FLJ77815, highly similar to Homo sapiens cysteine and glycine-rich protein 1 (CSRP1), mRNA (112); cDNA FLJ16406 fis, clone UTERU2026142, highly similar to Cysteine and glycine-rich protein 1 (89); cDNA FLJ61189, highly similar to Cysteine and glycine-rich protein 1 (112); cDNA FLJ54121, highly similar to Cysteine and glycine-rich protein 1 (112); Cysteine and glycine-rich protein 1 (112); Cy…
VNGKWLKPEHRNS	0.83	0.16	Aldehyde dehydrogenase family 16 member A1 (50); cDNA FLJ60673, highly similar to Homo sapiens aldehyde dehydrogenase 16 family, member A1 (ALDH16A1), mRNA (50)
DRPMHVKMDERAL	0.97	0.3	cDNA FLJ60435, highly similar to Heterogeneous nuclear ribonucleoprotein M (238); Heterogeneous nuclear ribonucleoprotein M (277); Heterogeneous nuclear ribonucleoprotein M isoform a variant (177); ORF protein (117)
ZZZZMSKSESPKE	0.89	0.15	cDNA FLJ51587, highly similar to Heterogeneous nuclear ribonucleoprotein A1 (7); cDNA FLJ51586, moderately similar to Heterogeneous nuclear ribonucleoprotein A1 (7); Putative uncharacterized protein ENSP00000383298 (7); Putative uncharacterized protein ENSP00000393546 (7); Heterogeneous nuclear ribonucleoprotein A1 (7); Putative heterogeneous nuclear ribonucleoprotein A1-like 3 (7)
QKLTLEKVFRGLL	0.87	0.21	GrpE protein homolog 2, mitochondrial (142); GrpE protein homolog (149)
HALEEIKKFLIPD	0.74	0.15	KH domain-containing, RNA-binding, signal transduction-associated protein 3 (152)
TNAEVLKVLGNPK	1.01	0.18	cDNA FLJ60058, highly similar to Myosin light chain 1, slow-twitch muscle A isoform (107); cDNA FLJ56329, highly similar to Myosin light polypeptide 6 (143); Myosin light polypeptide 6 (50); Myosin light chain 6B (107); MYL6 protein (15)
EEGHDPKEPEQLR	1.19	0.36	cDNA FLJ59080, highly similar to Heterogeneous nuclear ribonucleoprotein A3 (29); Putative uncharacterized protein HNRNPA3 (29); FBRNP (29); Heterogeneous nuclear ribonucleoprotein A3 (29)
EGAKIVKDLMSKA	1.3	0.23	Phosphoglycerate kinase (267); Phosphoglycerate kinase (131); Phosphoglycerate kinase (92); Phosphoglycerate kinase (177); Phosphoglycerate kinase (239); Phosphoglycerate kinase 1 (267)
VRDLEEKLETLRL	1.19	0.21	Putative uncharacterized protein DCTN1 (230); Putative uncharacterized protein DCTN1 (235); cDNA FLJ56465, highly similar to Dynactin-1 (193); Dynactin subunit 1 (230); Dynactin 1 isoform 1 variant (55); Putative uncharacterized protein DKFZp686E0752 (193); Putative uncharacterized protein DKFZp686E191 (193); DCTN1 protein (96); Putative uncharacterized protein DKFZp686I0746 (230)
ISSIEQKTDTSDK	1.09	0.32	14-3-3 protein theta (68); cDNA FLJ52118, highly similar to 14-3-3 protein theta (33); Putative uncharacterized protein YWHAQ (68)
PRWSNAKMEIATK	0.95	0.17	Inorganic pyrophosphatase (57); Pyrophosphatase (Inorganic) 1 (57)
AILGNPKVKAHGK	1.1	0.23	Putative uncharacterized protein HBE1 (60); Hemoglobin subunit epsilon (60)
RGILTLKYPIEHG	0.99	0.19	Beta-actin (58); Putative uncharacterized protein ACTA1 (70); cDNA FLJ78096, highly similar to Homo sapiens actin, alpha, cardiac muscle (ACTC), mRNA (70); Actin, aortic smooth muscle (70); Actin, cytoplasmic 1 (68); Actin, alpha cardiac muscle 1 (70); Actin, cytoplasmic 2 (68); Actin, gamma-enteric smooth muscle (69); Actin, alpha skeletal muscle (70); cDNA FLJ39583 fis, clone SKMUS2004897, high…
NWTKIMKTIVDDP	0.43	0.29	FACT complex subunit SPT16 (907)
LVKEFNKYDTDGS	0.67	0.15	Actin-related protein 3 (244); cDNA FLJ51082, highly similar to Actin-like protein 3 (182); cDNA FLJ52521, highly similar to Actin-like protein 3 (115); cDNA, FLJ79295, highly similar to Actin-like protein 3 (193); cDNA, FLJ93049, Homo sapiens ARP3 actin-related protein 3 homolog (yeast) (ACTR3), mRNA (244); ARP3 actin-related protein 3 homolog variant (195)
QSLNWTKIMKTIV	0.81	0.15	FACT complex subunit SPT16 (904)
DTRLWAKNSEGSL	0.78	0.11	Ubiquitin carboxyl-terminal hydrolase (205); Ubiquitin carboxyl-terminal hydrolase 11 (245)
LQHPFLKLAKPLS	0.86	0.15	cDNA FLJ75088, highly similar to Homo sapiens p21 (CDKN1A)-activated kinase 2 (PAK2), mRNA (501); PAK3b protein (535); PAK3c protein (541); PAK3cb protein (556); cDNA, FLJ96299, highly similar to Homo sapiens p21 (CDKN1A)-activated kinase 3 (PAK3), mRNA (520); Putative uncharacterized protein PAK3 (436); Serine/threonine-protein kinase PAK 2 (501); Serine/threonine-protein kinase PAK 3 (535); PAK…
AKEDYTKFNTKDL	1.11	0.28	RNASEH2B protein (264); Ribonuclease H2 subunit B (264)
DYKNICKVVEVGS	0.86	0.12	Pyruvate kinase (92); Pyruvate kinase (146); Pyruvate kinase (151); Pyruvate kinase isozymes M1/M2 (166)
QRGYTAKELNVSF	0.73	0.12	Putative uncharacterized protein PCYT1B (191); cDNA, FLJ93994, highly similar to Homo sapiens phosphate cytidylyltransferase 1, choline, alpha isoform (PCYT1A), mRNA (228); cDNA FLJ50783, highly similar to Choline-phosphate cytidylyltransferase B (EC2.7.7.15) (210); cDNA FLJ53135, highly similar to Choline-phosphate cytidylyltransferase A (EC 2.7.7.15) (189); Putative uncharacterized protein PCYT…
DSKDISKGIIEAR	0.56	0.13	GPI ethanolamine phosphate transferase 2 (754); cDNA FLJ90234 fis, clone NT2RM2000565 (665)
IIGGDPKGNNFLY	0.53	0.1	Putative uncharacterized protein WDR1 (28); cDNA FLJ45763 fis, clone N1ESE2000698, highly similar to WD repeat protein 1 (28); cDNA FLJ57081, moderately similar to WD repeat protein 1 (28); cDNA FLJ59130, moderately similar to Homo sapiens WD repeat domain 1 (WDR1), transcript variant 2, mRNA (28); WD repeat domain 1, isoform CRA_a (28); WD repeat-containing protein 1 isoform 1 variant (28); WD r…
ILQIHTKNMKLAD	0.59	0.1	VCP protein (55); VCP protein (224); Valosin-containing protein (14); Putative uncharacterized protein DKFZp434K0126 (11); Transitional endoplasmic reticulum ATPase (386)
SHAIELKSGSNKN	0.62	0.11	Phospholipase A-2-activating protein (691)
DLGKAAKDVFNKG	0.67	0.09	Voltage-dependent anion-selective channel protein 3 (15)
EKELLEKVKHLEN	0.8	0.1	RB1-inducible coiled-coil protein 1 (1263)
AQGLLEKIATPKV	0.68	0.14	cDNA FLJ57730, highly similar to Glutathione S-transferase kappa 1 (EC 2.5.1.18) (115); cDNA FLJ60871, highly similar to Glutathione S-transferase kappa 1 (EC 2.5.1.18) (146); Glutathione S-transferase kappa 1 (158); GSTK1 protein (105); Glutathione S-transferase kappa 1, isoform CRA_d (158); Glutathione S-transferase kappa 1, isoform CRA_a (214)
LMLDLNKAKSMGQ	0.52	0.08	cDNA FLJ59448, highly similar to Trifunctional enzyme subunit beta, mitochondrial (174); cDNA FLJ55769, highly similar to Trifunctional enzyme subunit beta, mitochondrial (183); cDNA FLJ56214, highly similar to Trifunctional enzyme subunit beta, mitochondrial (166); Trifunctional enzyme subunit beta, mitochondrial (188)
IVEKLEKSTKPIV	0.63	0.13	cDNA FLJ54509, highly similar to Trifunctional enzyme subunit alpha, mitochondrial (132); cDNA FLJ52806, highly similar to Trifunctional enzyme subunit alpha, mitochondrial (45); Trifunctional enzyme subunit alpha, mitochondrial (132); Putative uncharacterized protein HADHA (132)
KVEWAKKAYGLQS	0.71	0.14	Nebulin-related anchoring protein (916); Nebulin-related-anchoring protein (916)
MDGMSTKKNVFII	0.52	0.09	VCP protein (283); VCP protein (452); Valosin-containing protein (242); Putative uncharacterized protein DKFZp434K0126 (239); Transitional endoplasmic reticulum ATPase (614)
TLVTASKDGYFKV	0.67	0.11	cDNA FLJ77055, highly similar to Homo sapiens WD repeat domain 75 (WDR75), mRNA (466); WD repeat-containing protein 75 (466)
LQTDVQKILRNAR	0.7	0.1	cDNA FLJ52585 (361); cDNA FLJ55475 (454); cDNA FLJ50701 (339); cDNA FLJ50705 (382); cDNA FLJ50723 (368); UPF0464 protein C15orf44 (418)
NAIMFGKKRHTDV	0.46	0.11	FACT complex subunit SPT16 (732)
DLGGDFKGVGKGS	0.87	0.2	cDNA, FLJ92803, highly similar to Homo sapiens hydroxysteroid (17-beta) dehydrogenase 4 (HSD17B4), mRNA (46); cDNA FLJ53298, highly similar to Peroxisomal multifunctional enzyme type 2 (46); cDNA FLJ55431, highly similar to Peroxisomal multifunctional enzyme type 2 (71); cDNA FLJ59409, highly similar to Peroxisomal multifunctional enzyme type 2 (22); cDNA FLJ59445, highly similar to Peroxisomal m…
EEIVQLKQRRRTL	0.87	0.15	Transcription factor MafG (53)
LIYKTQKNGQWVG	0.58	0.1	Oxysterol-binding protein-related protein 8 (183); Oxysterol-binding protein (183); Oxysterol-binding protein (141); cDNA FLJ31273 fis, clone KIDNE2006299, weakly similar to BOB1 PROTEIN (170)
KLRGWLKSNVSDA	0.72	0.11	Triosephosphate isomerase (158); Triosephosphate isomerase (112); Triosephosphate isomerase (194)
SLPHYQKLKKFLN	0.75	0.13	Putative uncharacterized protein MATR3 (877); cDNA FLJ10526 fis, clone NT2RP2000931, highly similar to Matrin-3 (491); cDNA FLJ55637, highly similar to Matrin-3 (491); cDNA FLJ53172, highly similar to Matrin-3 (541); cDNA, FLJ79319, highly similar to Matrin-3 (541); Matrin-3 (829); Putative uncharacterized protein DKFZp686K0542 (491); Putative uncharacterized protein DKFZp686K23100 (829); Putativ…
IVPKKKKPLKLGP	1.03	0.25	cDNA FLJ77519, highly similar to Homo sapiens secreted frizzled related protein mRNA (230); cDNA FLJ45402 fis, clone BRHIP3029409, moderately similar to Homo sapiens secreted frizzled-related protein 1 (SFRP1) (95); Secreted frizzled-related protein 1 (231)
KKKLKDKKEKKAK	1.2	0.19	Putative uncharacterized protein CHD5 (106); Chromodomain-helicase-DNA-binding protein 5 (106); cDNA FLJ45103 fis, clone BRAWH3032571, moderately similar to Chromodomain helicase-DNA-binding protein 4 (106)
SHLTKHKTIHTGK	2	0.39	cDNA FLJ40845 fis, clone TRACH2014483, highly similar to Zinc finger protein 682 (272); Zinc finger protein 682, isoform CRA_a (310); Zinc finger protein 682, isoform CRA_b (251); Zinc finger protein 682 (304)
YNCKLNKVDQKVK	3.55	1.27	TRM5 tRNA methyltransferase 5 homolog (S. cerevisiae) (344); tRNA (guanine-N(1)-)-methyltransferase (344)
RVLIPVKQYPKFN	1.85	0.39	cDNA, FLJ93365, highly similar to Homo sapiens KH domain containing, RNA binding, signal transduction associated 1 (KHDRBS1), mRNA (165); cDNA FLJ38664 fis, clone HLUNG2002334, highly similar to Homo sapiens KH domain containing, RNA binding, signal transduction associated 2 (KHDRBS2), mRNA (69); cDNA FLJ54590, highly similar to KH domain-containing, RNA-binding, signaltransduction-associated pro…
SLEQEKKTEKPST	1.71	0.43	BDP1 protein (205); Transcription factor TFIIIB component B'' homolog (208); Putative uncharacterized protein BDP1 (208)
RFIDFFKRNEHTY	0.84	0.13	cDNA FLJ61339, highly similar to Alanyl-tRNA synthetase (EC 6.1.1.7) (19); Alanyl-tRNA synthetase, cytoplasmic (19)
EERLQAKKEEIIK	0.98	0.16	Ribosomal protein L19 (180); Ribosomal protein L19 (161); 60S ribosomal protein L19 (180)
CRVPKSKLEVGRI	0.77	0.16	Protein BUD31 homolog (125); Putative uncharacterized protein BUD31 (84); Putative uncharacterized protein BUD31 (96)
MLTLASKLKRDDG	0.79	0.15	Ubiquitin carrier protein (7); Ubiquitin-conjugating enzyme E2F (Putative), isoform CRA_f (7); Putative uncharacterized protein UBE2F (7); Ubiquitin-conjugating enzyme E2F (Putative), isoform CRA_a (7); Ubiquitin-conjugating enzyme E2F (Putative), isoform CRA_g (7); NEDD8-conjugating enzyme UBE2F (7)
YKACERKNAEAVK	0.98	0.26	Ankyrin repeat and SOCS box protein 2 (168); cDNA FLJ11187 fis, clone PLACE1007537, highly similar to Ankyrin repeat and SOCS box protein 2 (114); cDNA FLJ32516 fis, clone SMINT1000103, highly similar to Ankyrin repeat and SOCS box protein 2 (184); cDNA FLJ56197, highly similar to Ankyrin repeat and SOCS box protein 2 (ASB-2) (216)
AYVWTLKGRTWKP	1.06	0.17	cDNA, FLJ95695, Homo sapiens actin related protein 2/3 complex, subunit 1B, 41kDa(ARPC1B), mRNA (82); Actin-related protein 2/3 complex subunit 1B (82); Putative uncharacterized protein ARPC1B (82)
NRKMSRKEKDERI	1.16	0.14	Putative uncharacterized protein SSR3 (63); Putative uncharacterized protein SSR3 (115); Translocon-associated protein subunit gamma (115)
QRKAAFKELQSTF	1.07	0.28	EF-hand domain-containing protein D2 (233)
AHQELIKQKKDIS	1.02	0.2	cDNA FLJ75975 (110); Cep57-related protein (110); OTTHUMP00000016948 (110); Chromosome 6 open reading frame 182, isoform CRA_c (110)
PTDEELKETIKKL	1.02	0.22	cDNA FLJ53031, highly similar to Protein DEK (298); cDNA FLJ52337, highly similar to Protein DEK (292); cDNA FLJ51914, highly similar to Protein DEK (302); Protein DEK (326)
EGAKIVKDIMAKA	1.06	0.18	Phosphoglycerate kinase 2 (267)
REEYEEKIRKLED	0.92	0.16	cDNA FLJ52464, highly similar to GTPase, IMAP family member 4 (276); cDNA FLJ51351, highly similar to GTPase, IMAP family member 4 (194); GTPase IMAP family member 4 (262)
ETQVILKKGKKVI	0.91	0.16	WD repeat-containing protein 87 (1368)
KLLEQYKEESKKA	1.05	0.18	cDNA FLJ44920 fis, clone BRAMY3011501, highly similar to Heterogeneous nuclear ribonucleoprotein U (595); cDNA FLJ54020, highly similar to Heterogeneous nuclear ribonucleoprotein U (629); Heterogeneous nuclear ribonucleoprotein U (670); Heterogeneous nuclear ribonucleoprotein U (Scaffold attachment factor A) (568); Heterogeneous nuclear ribonucleoprotein U (Scaffold attachment factor A) (394); He…
SLHQRIKNGEKPF	1.01	0.26	cDNA FLJ56144, highly similar to Zinc finger protein 182 (208); Zinc finger protein 21 (KOX 14), isoform CRA_b (209); Zinc finger protein 182 (228)
FSEFSKKCSERWK	1.32	0.17	cDNA FLJ56337, highly similar to High mobility group protein B1 (44); High mobility group protein B1 (44); High-mobility group box 1 variant (46); High-mobility group box 1 (44); Similar to nonhistone chromosomal protein HMG-1 [Homo sapiens]; probable pseudogene; similar to P09429 (PID:g123369) (44); High mobility group protein HMG1 (44)
KHLEERKKRLEEQ	1.09	0.22	Putative uncharacterized protein MAP7 (107); cDNA, FLJ93207, highly similar to Homo sapiens microtubule-associated protein 7 (MAP7), mRNA (107); cDNA FLJ50486, highly similar to Homo sapiens microtubule-associated protein 7 (MAP7), mRNA (129); cDNA FLJ50558, highly similar to Homo sapiens microtubule-associated protein 7 (MAP7), mRNA (129); cDNA FLJ56145, highly similar to Homo sapiens microtubul…
GKFSLFKSKKPRH	0.87	0.15	Neuroblast differentiation-associated protein AHNAK (5772); Putative uncharacterized protein AHNAK (2842)
KQKWRKKGECFGG	1.11	0.23	Putative uncharacterized protein RECQL4 (386); ATP-dependent DNA helicase Q4 (386)
RTCLGPKSMMKML	1.17	0.38	cDNA FLJ44436 fis, clone UTERU2019706, highly similar to T-complex protein 1 subunit gamma (44); PIG48 (44); Chaperonin containing TCP1, subunit 3 (Gamma) variant (76); Chaperonin containing TCP1, subunit 3 (Gamma) (68); Chaperonin containing TCP1, subunit 3 (Gamma) (44); T-complex protein 1 subunit gamma (44)
NMGYAAKAMKAAH	1.46	0.29	Charged multivesicular body protein 4b (114)
YDSSSSKGKKKGR	0.88	0.44	Inhibitor of growth family member 4 variant deltaEx2 (103); Inhibitor of growth family member 4 variant deltaEx6A (127); cDNA FLJ53613, highly similar to Inhibitor of growth protein 4 (127); Inhibitor of growth protein 4 (127)
NFKSPVKTIRZZZ	0.74	0.12	cDNA, FLJ92126, Homo sapiens casein kinase 2, beta polypeptide (CSNK2B), mRNA (212); Casein kinase II subunit beta (212); Casein kinase 2, beta polypeptide, isoform CRA_d (231)
LKPEVDKLNIMAA	0.89	0.15	cDNA FLJ54052, highly similar to Alpha-1 catenin (Cadherin-associated protein) (63); cDNA FLJ54547, highly similar to Alpha-1 catenin (Cadherin-associated protein) (83); cDNA FLJ54047, highly similar to Alpha-1 catenin (Cadherin-associated protein) (171); Putative uncharacterized protein CTNNA1 (186); Catenin alpha-1 (186)
IPELNGKLTGMAF	0.72	0.15	Glyceraldehyde-3-phosphate dehydrogenase (139); Glyceraldehyde-3-phosphate dehydrogenase (227); Glyceraldehyde-3-phosphate dehydrogenase (202); Glyceraldehyde-3-phosphate dehydrogenase (34)
LCNGDSKLENAGG	0.78	0.14	cDNA, FLJ79481, highly similar to GMP synthase (glutamine-hydrolyzing) (EC6.3.5.2) (9); GMP synthase [glutamine-hydrolyzing] (9); Guanine monophosphate synthetase variant (9)
CLVKIYKSDGIKG	0.81	0.22	ADP/ATP translocase 2 (166); cDNA, FLJ96310, highly similar to Homo sapiens solute carrier family 25 (mitochondrial carrier; adenine nucleotide translocator), member 5 (SLC25A5), mRNA (166); SLC25A5 protein (191)
LTDVYNKIHMGSC	0.63	0.16	Acetyl-CoA acetyltransferase, mitochondrial (190)
QLYSTLKSILQQV	0.8	0.14	Histone acetyltransferase KAT2B (733)
THCQSGKSCQVAH	0.67	0.12	Histone acetyltransferase p300 (386); EP300 protein (386)
VRHLGYKPEEYKM	0.87	0.2	cDNA FLJ53573, highly similar to Myosin Ic (680); cDNA FLJ52405, highly similar to Myosin Ic (669); Myosin-Ic (704)
FVEFAAKPPARKA	0.63	0.14	cDNA FLJ57805, highly similar to Homo sapiens paraspeckle component 1 (PSPC1), transcript variant alpha, mRNA (146); Paraspeckle component 1 (206)
NFAEFSKKCSERW	0.68	0.12	Putative high mobility group protein B3-like protein (43); High mobility group protein B2 (43); High mobility group protein B3 (43); Non-histone chromosomal protein (43); High-mobility group box 2 (43); Putative uncharacterized protein DKFZp779G118 (73)
MLKQDYKEGEMTL	0.96	0.16	Proteasome subunit alpha type (180); Proteasome subunit alpha type-4 (180); PSMA4 protein (109); Proteasome subunit beta type (156)
LRVGIPKETPALT	0.84	0.12	Putative uncharacterized protein ACAA2 (81); cDNA, FLJ95265, highly similar to Homo sapiens acetyl-Coenzyme A acyltransferase 2 (mitochondrial 3-oxoacyl-Coenzyme A thiolase) (ACAA2), nuclear gene encoding mitochondrial protein, mRNA (81); cDNA FLJ30111 fis, clone BNGH42000360, highly similar to 3-ketoacyl-CoA thiolase, mitochondrial (EC 2.3.1.16) (81); 3-ketoacyl-CoA thiolase, mitochondrial (81)
IAMKTEKEEMSFE	0.88	0.15	Nuclear receptor coactivator 2 (788)
MKEILDKKVEKVT	0.98	0.15	cDNA FLJ77842 (211); cDNA FLJ53619, highly similar to Heat shock protein HSP 90-beta (563); cDNA FLJ54023, highly similar to Heat shock protein HSP 90-beta (535); Putative heat shock protein HSP 90-beta-3 (446); Heat shock protein HSP 90-beta (573); cDNA: FLJ21717 fis, clone COL10322 (211)
EGPAPCKQMKLEA	1.05	0.23	MYC-induced nuclear antigen (20)
KRSLLAKDLTKTC	0.88	0.14	Putative uncharacterized protein DSCR3 (83); Down syndrome critical region protein 3 (131); Putative uncharacterized protein (89)
GPGMPAKPLQHFS	0.83	0.16	Histone-lysine N-methyltransferase MLL2 (3729); Myeloid/lymphoid or mixed-lineage leukemia 2 variant (1171)
KWSFMNKPSDGRP	0.86	0.16	cDNA FLJ57201, highly similar to NADH-ubiquinone oxidoreductase 51 kDa subunit, mitochondrial (EC 1.6.5.3) (104); NADH dehydrogenase [ubiquinone] flavoprotein 1, mitochondrial (104); NADH dehydrogenase (Ubiquinone) flavoprotein 1, 51kDa variant (104)
IANAHRKPLVIIA	0.89	0.23	Mitochondrial heat shock 60kD protein 1 variant 1 (269); cDNA FLJ54912, highly similar to 60 kDa heat shock protein, mitochondrial (246); cDNA FLJ51028, highly similar to 60 kDa heat shock protein, mitochondrial (125); cDNA FLJ54373, highly similar to 60 kDa heat shock protein, mitochondrial (260); cDNA FLJ51046, highly similar to 60 kDa heat shock protein, mitochondrial (213); 60 kDa chaperonin …
AVDKIMKDLDQCR	0.7	0.13	Protein S100-A10 (57)
NPEVGLKPVWYSP	0.7	0.17	cDNA FLJ56021, highly similar to Bifunctional aminoacyl-tRNA synthetase[Includes: Glutamyl-tRNA synthetase (EC 6.1.1.17) (567); EPRS protein (549); Bifunctional aminoacyl-tRNA synthetase (542)
AKVFIDKQTNLSK	0.66	0.13	Putative uncharacterized protein CUGBP2 (458); cDNA, FLJ94762, highly similar to Homo sapiens CUG triplet repeat, RNA binding protein 2 (CUGBP2),mRNA (459); cDNA FLJ54335, highly similar to Homo sapiens CUG triplet repeat, RNA binding protein 2 (CUGBP2), transcript variant 3, mRNA (446); cDNA FLJ51739, highly similar to Homo sapiens CUG triplet repeat, RNA binding protein 2 (CUGBP2), transcript v…
NFNSIAKILAQQT	0.85	0.15	Abhydrolase domain-containing protein 11 (87); Putative uncharacterized protein ABHD11 (37); Putative uncharacterized protein ABHD11 (87); Putative uncharacterized protein ABHD11 (68)
SRLHDSKGQTKLL	0.76	0.16	Nuclear receptor coactivator 2 (636)
DTQVHGKKLFLRF	0.86	0.21	Endonuclease VIII-like 2 (50)
KNRICFKFDHLRK	0.78	0.21	cDNA, FLJ95684, Homo sapiens capping protein (actin filament) muscle Z-line, alpha2 (CAPZA2), mRNA (97); Putative uncharacterized protein CAPZA2 (97); cDNA FLJ51827, highly similar to F-actin capping protein alpha-2 subunit (97); F-actin-capping protein subunit alpha-2 (97); Capping protein (Actin filament) muscle Z-line, alpha 2 variant (97)
CGKNPAKYYTLFG	0.69	0.13	cDNA FLJ58269, highly similar to Bifunctional aminoacyl-tRNA synthetase (467); Bifunctional aminoacyl-tRNA synthetase (1503)
CLVEIEKAPKVVA	0.74	0.13	NADH-ubiquinone oxidoreductase 75 kDa subunit (98); cDNA FLJ53201, highly similar to NADH-ubiquinone oxidoreductase 75 kDa subunit, mitochondrial (EC 1.6.5.3) (27); Putative uncharacterized protein NDUFS1 (84); NADH-ubiquinone oxidoreductase 75 kDa subunit, mitochondrial (84)
LESKGHKKLLQLL	0.84	0.2	cDNA FLJ77005, highly similar to Homo sapiens nuclear receptor coactivator 3 (NCOA3), transcript variant 1, mRNA (619); cDNA FLJ53590, highly similar to Nuclear receptor coactivator 3 (EC 2.3.1.48) (414); Putative uncharacterized protein NCOA3 (629); Nuclear receptor coactivator 3 (619); Nuclear receptor coactivator 3 isoform a variant (623)
RQLFWEKKLSGLN	0.77	0.14	cDNA FLJ10612 fis, clone NT2RP2005358, highly similar to Methyl-CpG-binding domain protein 3 (73); Methyl-CpG-binding domain protein 3 (141)
GDTIFGKIIRKEI	0.8	0.15	Histidine triad nucleotide-binding protein 1 (21)
KSLAPKKPPTGPL	0.83	0.15	Putative uncharacterized protein ENSP00000365178 (1188); HLA-B associated transcript 2 (1196); cDNA FLJ56600, highly similar to Large proline-rich protein BAT2 (421); Large proline-rich protein BAT2 (1196); Putative uncharacterized protein BAT2 (1179); Putative uncharacterized protein ENSP00000417023 (1179); Putative uncharacterized protein BAT2 (1188); Putative uncharacterized protein ENSP000004…
DAASKHKQLSELL	1.09	0.37	CREBBP (16); CREBBP (39); CREB-binding protein (68); Histone acetyltransferase p300 (79); CREBBP variant protein (136); MOZ/CBP protein (102); EP300 protein (79); MORF/CBP protein (126)
HFNKAPKRSRYTY	1.01	0.22	Ubiquitin carboxyl-terminal hydrolase (1071); Ubiquitin carboxyl-terminal hydrolase (988); Ubiquitin carboxyl-terminal hydrolase (1097); Ubiquitin carboxyl-terminal hydrolase 7 (1087)
KPEDWDKPEHIPD	1.36	0.33	cDNA FLJ58668, highly similar to Calreticulin (117); Calreticulin (238); Calreticulin variant (227)
LEDLIVKDGLTDV	0.85	0.13	Acetyl-CoA acetyltransferase, mitochondrial (181)
IIIHSLKKCDISL	1.06	0.2	ATP-dependent DNA helicase 2 subunit 2 (155); Putative uncharacterized protein XRCC5 (155)
INRPFLKPSYAFS	0.98	0.18	cDNA, FLJ95010, highly similar to Homo sapiens Bloom syndrome (BLM), mRNA (1411); cDNA FLJ56969, highly similar to Bloom syndrome protein (EC 3.6.1.-) (1041); BLM protein (1036); Bloom syndrome protein (1411)
KLDEILKEIKSIK	0.95	0.2	Coronin-1C_i2 protein (452); Coronin-1C_i3 protein (499); cDNA FLJ50992, highly similar to Coronin-1C (409); cDNA, FLJ79403, highly similar to Coronin-1C (341); cDNA, FLJ78964, highly similar to Coronin-1C (275); Coronin-1C (446); Coronin, actin binding protein, 1C variant (446); Coronin, actin binding protein, 1C variant (473)
QVELFVKAGSDGA	1.1	0.19	Chloride intracellular channel protein 1 (13); Chloride intracellular channel 1 variant (13); cDNA, FLJ94671, Homo sapiens chloride intracellular channel 1 (CLIC1), mRNA (13)
RADHLLKAHLQKL	1.16	0.23	Glycyl-tRNA synthetase (219)
LATWATKELRKLK	1.16	0.21	cDNA, FLJ95650, highly similar to Homo sapiens karyopherin (importin) beta 1 (KPNB1), mRNA (867); cDNA FLJ50625, highly similar to Importin beta-1 subunit (651); cDNA FLJ50715, highly similar to Importin beta-1 subunit (722); cDNA, FLJ79320, highly similar to Importin beta-1 subunit (722); Importin subunit beta-1 (867)
YCKLVQKSLARML	0.96	0.15	Hydroxymethylglutaryl-CoA synthase, cytoplasmic (273); 3-hydroxy-3-methylglutaryl-Coenzyme A synthase 1 (Soluble) (273); cDNA FLJ38173 fis, clone FCBBF1000053, highly similar to HYDROXYMETHYLGLUTARYL-COA SYNTHASE, CYTOPLASMIC (262)
KLKDEPKIKLLKK	0.85	0.15	cDNA FLJ36409 fis, clone THYMU2010448, highly similar to Regulator of nonsense transcripts 3B (267)
LGGFGSKRKRSSS	1	0.11	cDNA FLJ16830 fis, clone UTERU3022536, highly similar to Chromodomain helicase-DNA-binding protein 4 (EC 3.6.1.-) (278); Chromodomain-helicase-DNA-binding protein 4 (304); CHD4 protein (304)
YRIRCGKKPSQKA	1.17	0.28	cDNA FLJ57979, highly similar to FERM domain-containing protein 4B (405); FERM domain-containing protein 4B (507); FRMD4B protein (73)
KTGKKGKGSKGCK	0.79	0.12	C-C motif chemokine 21 (117); Chemokine (C-C motif) ligand 21 (117); cDNA, FLJ92167, Homo sapiens chemokine (C-C motif) ligand 21 (CCL21), mRNA (117)
RPLIRPKKRLIVS	0.99	0.12	Putative uncharacterized protein GATA1 (245); Putative uncharacterized protein GATA1 (10); Erythroid transcription factor (245)
AITATQKTVDGPS	1.38	0.19	Glyceraldehyde-3-phosphate dehydrogenase (98); Glyceraldehyde-3-phosphate dehydrogenase (186); Glyceraldehyde-3-phosphate dehydrogenase (161)
AVVHLKKAHRRVH	1.31	0.23	Testis expressed 15 (1006); Testis-expressed sequence 15 protein (1006)
KAVVHLKKAHRRV	1.1	0.14	Testis expressed 15 (1005); Testis-expressed sequence 15 protein (1005)
DLMEYAKQHGIPI	1.05	0.18	Argininosuccinate synthase (165); Putative uncharacterized protein ENSP00000396289 (150); Argininosuccinate synthetase 1 (146)
EIARFYKLHERKC	1.03	0.1	cDNA FLJ35111 fis, clone PLACE6007180, highly similar to Coronin-6 (104); cDNA FLJ37364 fis, clone BRAMY2024247, highly similar to Coronin-6 (104); cDNA FLJ39112 fis, clone NTONG2005657, highly similar to Coronin-6 (232); Coronin-1B (339); Coronin-6 (338); Putative uncharacterized protein DKFZp762I166 (133)
TKPVLGKDEDFKQ	0.98	0.15	cDNA FLJ56021, highly similar to Bifunctional aminoacyl-tRNA synthetase[Includes: Glutamyl-tRNA synthetase (EC 6.1.1.17) (662); EPRS protein (644); Bifunctional aminoacyl-tRNA synthetase (637)
EVALDYKKKKHVF	0.71	0.16	Spectrin, beta, non-erythrocytic 1, isoform CRA_d (2269); Spectrin, beta, non-erythrocytic 1, isoform CRA_c (259); Spectrin beta chain, brain 1 (2269)
AKEYVIKACSRKL	0.8	0.09	Transcription elongation factor SPT6 (743)
LNKSELKELLTRE	0.84	0.16	Leukemia multidrug resistance associated protein (25); Protein S100-A4 (35)
FAMNVGKARGFFK	0.72	0.11	Pyruvate kinase (424); Pyruvate kinase (478); Pyruvate kinase (483); Pyruvate kinase isozymes M1/M2 (498); Pyruvate kinase (333); Pyruvate kinase (310)
VAVLLTKKSLARR	0.79	0.22	Fatty acid synthase (235)
QLKSFQKIQVRLV	0.96	0.16	Putative uncharacterized protein RPS7 (74); cDNA, FLJ92055, Homo sapiens ribosomal protein S7 (RPS7), mRNA (74); 40S ribosomal protein S7 (74)
DRLGESKYLMALK	1.02	0.1	Methionine aminopeptidase 2 (427); Methionine aminopeptidase (404); Methionine aminopeptidase (202)
FGKEFDKHFGKGG	1.16	0.25	DNA-dependent protein kinase catalytic subunit (3642)
FYEAFSKNLKLGI	0.55	0.12	cDNA FLJ77842 (73); cDNA FLJ53619, highly similar to Heat shock protein HSP 90-beta (425); cDNA FLJ54023, highly similar to Heat shock protein HSP 90-beta (397); Heat shock protein HSP 90-beta (435); Heat shock protein 90kDa alpha (Cytosolic), class B member 1 (60); cDNA: FLJ21717 fis, clone COL10322 (73)
DWSHYFKIIEDLR	0.71	0.11	cDNA, FLJ94640, highly similar to Homo sapiens keratin 18 (KRT18), mRNA (131); Keratin, type I cytoskeletal 18 (131)
IAAKLAKDREAAE	0.85	0.23	cDNA, FLJ96158, highly similar to Homo sapiens calpain 2, (m/II) large subunit (CAPN2), mRNA (10); cDNA FLJ58224, highly similar to Calpain-2 catalytic subunit (EC 3.4.22.53) (10); Calpain-2 catalytic subunit (10); Calpain 2, large [catalytic] subunit variant (39)
IESLQLKPGQVVY	0.74	0.14	Putative uncharacterized protein ZDHHC3 (155); Palmitoyltransferase ZDHHC3 (121)
LLDAYLKTRTFLV	0.57	0.15	cDNA FLJ56389, highly similar to Elongation factor 1-gamma (197); cDNA FLJ59433, highly similar to Elongation factor 1-gamma (27); Elongation factor 1-gamma (147); Eukaryotic translation elongation factor 1 gamma, isoform CRA_c (147)
RRVVNGKVEYFLK	0.46	0.08	Coiled-coil domain containing 32, isoform CRA_c (44); Putative uncharacterized protein CBX3 (44); Chromobox protein homolog 3 (44)
GPTHLTKPTTTSS	0.75	0.19	Putative uncharacterized protein NCOR2 (1787); Putative uncharacterized protein NCOR2 (1778); Putative uncharacterized protein NCOR2 (117); Putative uncharacterized protein NCOR2 (1232); Putative uncharacterized protein NCOR2 (1777); Putative uncharacterized protein NCOR2 (22); Putative uncharacterized protein NCOR2 (85); Nuclear receptor corepressor 2 (1795)
LLENLEKIEKEHC	0.94	0.21	LOC649330 protein (203)
KSEEQLKEEGIEY	1.05	0.18	Dihydrolipoyl dehydrogenase (360); cDNA FLJ50515, highly similar to Dihydrolipoyl dehydrogenase, mitochondrial (EC 1.8.1.4) (311); cDNA FLJ56112, highly similar to Dihydrolipoyl dehydrogenase, mitochondrial (EC 1.8.1.4) (387); Dihydrolipoyl dehydrogenase (362); Dihydrolipoyl dehydrogenase, mitochondrial (410)
ELAEFEKLSDQVK	0.89	0.19	SAT2 protein (94); Diamine acetyltransferase 2 (29)
PTDFLAKMEEANI	0.7	0.14	cDNA FLJ60080, highly similar to 130 kDa leucine-rich protein (LRP 130) (87); Putative uncharacterized protein LRPPRC (187); Putative uncharacterized protein LRPPRC (161); Leucine-rich PPR motif-containing protein, mitochondrial (187)
LIDGLTKFFTPSP	0.69	0.13	MYST3 protein (415); MYST histone acetyltransferase (Monocytic leukemia) 4 (440); Histone acetyltransferase MYST3 (415); Histone acetyltransferase MYST4 (440)
NSSPSAKDIKKIL	0.76	0.19	cDNA, FLJ92222, Homo sapiens ribosomal protein, large P2 (RPLP2), mRNA (21); 60S acidic ribosomal protein P2 (21)
GPSFPLKGITEQQ	0.83	0.24	ATP-dependent DNA helicase 2 subunit 2 (195); Putative uncharacterized protein XRCC5 (31)
PDYRQWKIEGTPL	0.66	0.11	Putative uncharacterized protein NDUFB3 (23); NADH dehydrogenase [ubiquinone] 1 beta subcomplex subunit 3 (23)
YRASEGKTVEVPF	0.52	0.09	GMP reductase 2 (291); GMP reductase (293); Guanosine monophosphate reductase 2, isoform CRA_e (128); GMP reductase (263)
LKHANAKPFEVPF	0.55	0.12	Putative uncharacterized protein NUDT5 (223); ADP-sugar pyrophosphatase (210)
PKTRSGKVMRRLL	0.71	0.16	Acetyl-coenzyme A synthetase 2-like, mitochondrial (642); cDNA FLJ58578, highly similar to Acetyl-coenzyme A synthetase 2-like, mitochondrial (EC 6.2.1.1) (521); Putative uncharacterized protein DKFZp666B209 (52); Putative uncharacterized protein DKFZp666G0810 (358); cDNA FLJ43068 fis, clone BRTHA3008778, moderately similar to Acetyl-coenzyme A synthetase (EC 6.2.1.1) (559); Acyl-CoA synthetase s…
AWEEYYKKMGQAV	0.79	0.13	Putative uncharacterized protein FUBP1 (592); cDNA FLJ53425, highly similar to Far upstream element-binding protein 1 (612); cDNA FLJ61021, highly similar to Far upstream element-binding protein 1 (576); Putative uncharacterized protein FUBP1 (591); Far upstream element-binding protein 1 (591); Far upstream element-binding protein variant (441)
PALVSKKLNVTEQ	0.78	0.16	Enolase (48); Alpha-enolase (81)
EIHAYRKLLEGEE	0.99	0.15	cDNA FLJ55771, highly similar to Lamin-A/C (34); cDNA FLJ56081, highly similar to Lamin-A/C (266); Lamin-A/C (378); Rhabdomyosarcoma antigen MU-RMS-40.12 (378); Lamin A/C transcript variant 1 (378); Lamin A/C (297); Lamin A/C (319); Lamin A/C (378); Progerin (378); LMNA protein (378)
LVAYARKVEGDMY	0.95	0.12	Histone acetyltransferase p300 (614); EP300 protein (614)
IWDTLQKLGAVYD	0.88	0.16	cDNA FLJ60080, highly similar to 130 kDa leucine-rich protein (LRP 130) (55); Putative uncharacterized protein LRPPRC (155); Putative uncharacterized protein LRPPRC (129); Leucine-rich PPR motif-containing protein, mitochondrial (155)
EIAFLKKVHEEEI	0.88	0.17	Mutant desmin (241); Desmin (241); Putative uncharacterized protein tmp_locus_29 (241); Mutant desmin CSM-7 (48)
SPNLWLKDVLKEE	0.85	0.14	DNA-dependent protein kinase catalytic subunit (1209)
PHQQVDKGAIKFV	0.78	0.14	cDNA FLJ59683, highly similar to Homo sapiens malignant T cell amplified sequence 1 (MCTS1), mRNA (100); Malignant T cell-amplified sequence 1 (99)
YMDPTGKTRTWES	1.08	0.16	Putative uncharacterized protein NUDT5 (42); ADP-sugar pyrophosphatase (42)
RRYLWLKDCKINL	1.06	0.18	Lamina-associated polypeptide 2, isoform alpha (656)
HYIDFNKRLDEWV	0.77	0.18	cDNA, FLJ93809, highly similar to Homo sapiens HIV-1 Tat interactive protein, 60kDa (HTATIP), mRNA (52); cDNA FLJ56211, highly similar to Histone acetyltransferase HTATIP (EC 2.3.1.48) (85); Putative uncharacterized protein KAT5 (85); Histone acetyltransferase KAT5 (52); HIV-1 Tat interactive protein, 60kDa isoform 3 variant (39)
INRNDTKEDVFVH	0.67	0.14	cDNA, FLJ95978, highly similar to Homo sapiens Y box binding protein 2 (YBX2), mRNA (116); Putative uncharacterized protein YBX1 (81); Putative uncharacterized protein ENSP00000403004 (83); DNA-binding protein A (113); YBX1 protein (81); CSDA protein variant (46); Nuclease sensitive element binding protein-1 (80); CSDA protein (113); Nuclease-sensitive element-binding protein 1 (81); Y-box-bindin…
MMVECSKYHGQLT	0.95	0.2	Carnitine O-palmitoyltransferase 2, mitochondrial (537); Carnitine O-palmitoyltransferase II, mitochondrial variant (456)
NKTTLQKMGKKQN	0.94	0.15	Coiled-coil domain containing 32, isoform CRA_c (10); Putative uncharacterized protein CBX3 (10); Chromobox protein homolog 3 (10)
GGTNIIKLIDTVK	0.96	0.19	Casein kinase II subunit alpha' (97)
GKLSYVKTCQEKF	0.94	0.18	cDNA FLJ58028, highly similar to Homo sapiens OCIA domain containing 1 (OCIAD1), mRNA (42); Putative uncharacterized protein OCIAD1 (96); OCIA domain-containing protein 1 (96)
DKGALAKLVEAIR	0.71	0.13	Ribosomal protein L7a (102); cDNA, FLJ92002, Homo sapiens ribosomal protein L7a (RPL7A), mRNA (217); Ribosomal protein L7a (93); 60S ribosomal protein L7a (217)
ESLFFDKVRKALR	0.68	0.18	Paired amphipathic helix protein Sin3a (469)
LASREGKYIPLPQ	0.44	0.07	cDNA FLJ77026, highly similar to Homo sapiens ataxin 2-like (ATXN2L), transcript variant E, mRNA (348); Ataxin-2-like protein (348); ATXN2L protein (348)
FIQTFGKEFDKHF	0.55	0.1	DNA-dependent protein kinase catalytic subunit (3638)
YVLLSEKKISSIQ	0.36	0.1	Mitochondrial heat shock 60kD protein 1 variant 1 (249); cDNA FLJ54912, highly similar to 60 kDa heat shock protein, mitochondrial (226); cDNA FLJ54373, highly similar to 60 kDa heat shock protein, mitochondrial (240); cDNA FLJ51046, highly similar to 60 kDa heat shock protein, mitochondrial (193); 60 kDa heat shock protein, mitochondrial (249); Putative uncharacterized protein HSPD1 (15)
ESRSKDKKEKDEC	1.19	0.27	Putative uncharacterized protein ENSP00000418220 (232); Putative uncharacterized protein ENSP00000417441 (479); U2-associated protein SR140 (912)
ZZMVLIKEFRVVL	0.45	0.14	cDNA, FLJ93543, highly similar to Homo sapiens phosphotidylinositol transfer protein, beta (PITPNB),mRNA (7); Putative uncharacterized protein PITPNB (7); Phosphatidylinositol transfer protein beta isoform (7)
NMPSHFKFKEYCP	0.92	0.11	cDNA FLJ53867, highly similar to Phosphatidylinositol-4-phosphate 5-kinase type-2 alpha (EC 2.7.1.68) (30); Phosphatidylinositol-5-phosphate 4-kinase type-2 alpha (89); Phosphatidylinositol-4-phosphate 5-kinase, type II, alpha (41)
QVLRVVKNFEHLN	0.79	0.15	Malic enzyme (60); NADP-dependent malic enzyme (60)
VFEAFGKIKSCTL	0.82	0.18	Poly(U)-binding-splicing factor PUF60 (251)
KEDLYLKPIQRTI	0.78	0.2	cDNA FLJ58164, highly similar to Elongation factor 2 (445); Elongation factor 2 (445); EEF2 protein (445); Similar to Elongation factor 2b (104)
EIIEGMKFDRGYI	0.78	0.2	Mitochondrial heat shock 60kD protein 1 variant 1 (218); cDNA FLJ51028, highly similar to 60 kDa heat shock protein, mitochondrial (74); cDNA FLJ54373, highly similar to 60 kDa heat shock protein, mitochondrial (209); cDNA FLJ51046, highly similar to 60 kDa heat shock protein, mitochondrial (162); 60 kDa heat shock protein, mitochondrial (218); Putative uncharacterized protein HSPD1 (218)
QTASIFKQPVTKI	0.64	0.14	cDNA FLJ10612 fis, clone NT2RP2005358, highly similar to Methyl-CpG-binding domain protein 3 (41); Methyl-CpG-binding domain protein 3 (109)
EKAAKWKNPDGHM	0.71	0.2	Protein pellino homolog 2 (176)
KFSAYIKNSRPEA	0.59	0.3	cDNA FLJ61180, highly similar to Chloride intracellular channel protein 4 (122); Chloride intracellular channel protein 4 (130); cDNA, FLJ96000, Homo sapiens chloride intracellular channel 4 (CLIC4), mRNA (130); cDNA FLJ10762 fis, clone NT2RP4000008, moderately similar to CHLORINE CHANNEL PROTEIN P64 (130)
MVNDAEKFAEEDK	0.93	0.35	78 kDa glucose-regulated protein (547); HSPA5 protein (548)
QAYQDQKPGTSGL	0.95	0.24	Phosphoglucomutase-1 (16)
SPEGTCKAFDTAG	0.74	0.16	Fatty acid synthase (213)
GAAGKFKRGKZZZ	1.24	0.39	cDNA FLJ51365, highly similar to Flap endonuclease 1 (EC 3.1.-.-) (341); Flap endonuclease 1 (377); cDNA, FLJ93171, Homo sapiens flap structure-specific endonuclease 1 (FEN1), mRNA (377)
RHSYFEKPKVDDE	1.16	0.3	cDNA, FLJ92684, highly similar to Homo sapiens IK cytokine, down-regulator of HLA II (IK), mRNA (386); cDNA FLJ53904, highly similar to Protein Red (198); IK cytokine, down-regulator of HLA II (386); Chondrosarcoma-associated protein 2 (386); Protein Red (386)
VHAAADKHNSVED	1.74	0.79	cDNA FLJ76043, highly similar to Homo sapiens cyclin T1 (CCNT1), mRNA (492); Cyclin-T1 (492)
NGQLKNKYGDAFI	1	0.33	U6 snRNA-associated Sm-like protein LSm6 (59); cDNA, FLJ92408, Homo sapiens LSM6 homolog, U6 small nuclear RNA associated (S.cerevisiae) (LSM6), mRNA (59)
KECKEAKEVKDAE	1.54	0.2	Insulin receptor substrate 4 (671)
RLREKDKHIEEVR	1.52	0.19	Stathmin (128)
KHPSDEKYSGLTA	0.94	0.3	Uncharacterized protein KIAA1143 (108)
PSRKDPKYREWHH	1.07	0.22	cDNA FLJ51535, highly similar to Phosphatidylethanolamine-binding protein 1 (80); Phosphatidylethanolamine-binding protein 1 (80)
RRIRKHKSKKKFK	1.03	0.14	cDNA FLJ56027, highly similar to Glutamate-rich protein 1 (118); Glutamate-rich protein 1 (118)
AQHDVYKGLLPEE	0.86	0.28	cDNA FLJ50859, highly similar to Electron transfer flavoprotein subunit alpha, mitochondrial (36); Electron transfer flavoprotein subunit alpha, mitochondrial (85); Electron-transfer-flavoprotein, alpha polypeptide (Glutaric aciduria II), isoform CRA_a (85)
HVEKLTKGAAIFF	0.78	0.15	Axin interactor, dorsalization-associated protein (235); cDNA FLJ53110 (211); AIDA protein (235)
VAPVVKKPHIYYG	0.9	0.18	cDNA, FLJ93619, highly similar to Homo sapiens PRP4 pre-mRNA processing factor 4 homolog (yeast) (PRPF4), mRNA (27); U4/U6 small nuclear ribonucleoprotein Prp4 (27); PRPF4 protein variant (42); PRP4 pre-mRNA processing factor 4 homolog (Yeast), isoform CRA_b (26); PRPF4 protein (26)
SVDQAGKYSKTVA	0.69	0.08	cDNA FLJ32300 fis, clone PROST2002227, highly similar to U3 small nucleolar ribonucleoprotein protein MPP10 (609); Putative uncharacterized protein MPHOSPH10 (469); U3 small nucleolar ribonucleoprotein protein MPP10 (609)
RKPNLEKHEEMFQ	0.55	0.18	cDNA FLJ59639 (966); Putative uncharacterized protein DKFZp434M131 (143)
VKQMEDKVSQLEM	0.59	0.09	Cingulin-like protein 1 (1069)
VATNVDKHKSDIL	0.84	0.18	Matrix-remodeling-associated protein 5 (1336)
ANALAHKYHTKLA	0.86	0.12	Hemoglobin beta globin chain (40)
NPELFIKPNKPVM	0.75	0.08	UPF0708 protein C6orf162 (44)
YVYPDDKYKETLQ	0.82	0.12	Delta-1-pyrroline-5-carboxylate dehydrogenase, mitochondrial (462); cDNA FLJ54479, highly similar to Delta-1-pyrroline-5-carboxylatedehydrogenase, mitochondrial (EC 1.5.1.12) (402); Mitochondrial aldehyde dehydrogenase 4 family member A1 transcript variant ALDH4A1_v6 (411)
EHGMPEKNPAEGN	0.92	0.18	cDNA FLJ44097 fis, clone TESTI4043129, weakly similar to PHD finger protein 20 (65); PHD finger protein 20-like protein 1 (303)
GLEQGGKASDGIS	0.74	0.13	Putative uncharacterized protein RAI1 (774); Putative uncharacterized protein RAI1 (726); Retinoic acid-induced protein 1 (774)
EKHCEFKQLALDH	1.63	0.33	Atlastin-3 (391); cDNA FLJ58636, moderately similar to Atlastin (373); Putative uncharacterized protein ATL3 (418)
GKKKDKKGKKGKK	1.58	0.28	cDNA FLJ60472, highly similar to Homo sapiens IQ motif containing with AAA domain (IQCA), mRNA (431); IQ and AAA domain-containing protein 1 (472)
GLSSDNKPMVNLD	1.43	0.25	CIP29 protein (82); SAP domain-containing ribonucleoprotein (142)
DKTVVNKDVFRDP	0.89	0.29	60S ribosomal protein L27 (98)
LQAQAGKHGDDLR	0.95	0.29	cDNA FLJ46620 fis, clone TLUNG2000654, highly similar to Keratin, type II cytoskeletal 7 (272); Keratin, type II cytoskeletal 7 (296); KRT7 protein (68); KRT7 protein (88); Putative uncharacterized protein (34)
FTTLGFKDERRNK	1.1	0.37	Putative uncharacterized protein BRD9 (51); cDNA FLJ58589, highly similar to Bromodomain-containing protein 9 (320); Bromodomain-containing protein 9 (373); Putative uncharacterized protein DKFZp434D0711 (51)
RKFIKNKAWSKQK	1.14	0.26	ATP-dependent RNA helicase DDX55 (519); DDX55 protein (126)
ESTDVTKGDSKNA	1.42	0.16	Histone acetyltransferase p300 (1542); EP300 protein (1542)
FAKGPAKRKPQEE	1.05	0.15	DNA (cytosine-5)-methyltransferase 1 (177); Cytosine-specific methyltransferase (164)
EHKLNGKVIDPKR	1.34	0.32	cDNA FLJ54150, highly similar to Heterogeneous nuclear ribonucleoprotein D0 (113); cDNA FLJ61020, highly similar to Heterogeneous nuclear ribonucleoprotein D0 (11); Putative uncharacterized protein HNRNPD (140); Heterogeneous nuclear ribonucleoprotein D0 (165); P37 AUF1 (144)
RIDNFSKVPVVFT	1.13	0.22	Vacuolar protein sorting 13 homolog D (S. cerevisiae) (1406); Vacuolar protein sorting-associated protein 13D (3523)
DWCSKLKFIDPKK	1.85	0.75	HCG1998531, isoform CRA_d (78); cDNA FLJ52463, highly similar to ATP-dependent RNA helicase DDX19A (EC 3.6.1.-) (138); cDNA FLJ50635, highly similar to ATP-dependent RNA helicase DDX19A (EC 3.6.1.-) (197); cDNA FLJ52357, highly similar to ATP-dependent RNA helicase DDX19B (EC 3.6.1.-) (203); ATP-dependent RNA helicase DDX19A (228); ATP-dependent RNA helicase DDX19B (229); DDX19B protein (199); DE…
PVKQYPKFNFVGK	1.57	0.15	cDNA, FLJ93365, highly similar to Homo sapiens KH domain containing, RNA binding, signal transduction associated 1 (KHDRBS1), mRNA (169); cDNA FLJ38664 fis, clone HLUNG2002334, highly similar to Homo sapiens KH domain containing, RNA binding, signal transduction associated 2 (KHDRBS2), mRNA (73); cDNA FLJ54590, highly similar to KH domain-containing, RNA-binding, signaltransduction-associated pro…
LASCYLKQGKFKQ	1.62	0.41	cDNA FLJ61233, highly similar to Kinesin light chain 1 (393); cDNA FLJ55519, highly similar to Kinesin light chain 1 (565); Kinesin light chain 1 (389); Kinesin light chain 1 (393); Kinesin light chain 1J (389); Kinesin light chain 1N (389); Kinesin light chain 1K (393); Kinesin light chain 1E (393); Kinesin light chain 1D (389); Kinesin light chain 1M (389); Kinesin light chain 1F (389); Kinesin…
TDYQMTKRDMGFT	1.42	0.38	Adenosine deaminase (312)
AHPGCGKSYTKSS	1.58	0.51	Erythroid Kruppel-like factor 1 variant (259); Krueppel-like factor 1 (288)
PVEKKKKGKRKSE	0.92	0.3	cDNA FLJ59295, highly similar to Chromodomain-helicase-DNA-binding protein 6 (EC 3.6.1.-) (176); Putative uncharacterized protein CHD6 (198); Chromodomain-helicase-DNA-binding protein 6 (198)
ETFIKGKERKTYQ	1.31	0.25	Transcriptional repressor CTCF (20)
VPLEGSKLAKKRA	1.17	0.39	Atrophin-1 (786); Atrophin-1 variant (375); Atrophin 1 (792)
ALVDKHKVKRQRL	1.13	0.22	C-terminal-binding protein 2 (8)
HKEAFLKKHNLKL	1.49	0.31	cDNA FLJ55034, highly similar to Dihydrolipoyllysine-residue succinyltransferase component of 2- oxoglutarate dehydrogenase complex, mitochondrial (EC 2.3.1.61) (186); Dihydrolipoyllysine-residue succinyltransferase component of 2-oxoglutarate dehydrogenase complex, mitochondrial (272); Alpha-ketoglutarate dehydrogenase complex dihydrolipoyl succinyltransferase (271); DLST protein (272); Full-len…
EEMKAAKEKLKYW	1.05	0.17	Bromodomain containing 1, isoform CRA_a (519); cDNA FLJ51158, highly similar to Bromodomain-containing protein 1 (212); cDNA FLJ61578, highly similar to Bromodomain-containing protein 1 (519); cDNA FLJ51191, highly similar to Bromodomain-containing protein 1 (114); Bromodomain-containing protein 1 (519); Bromodomain containing protein 1 variant (113); BRD1 protein (519); Putative uncharacterized …
SKNAKKKNNKKTS	1.28	0.31	Histone acetyltransferase p300 (1551)
ASESLIKQIPRIL	1.04	0.19	Ribosomal protein L1 (118); Ribosomal protein L1 (107); 60S ribosomal protein L10a (118)
MKEMRAKVVAECT	1.19	0.18	cDNA FLJ90224 fis, clone NT2RM1000789, highly similar to Mus musculus transcription factor 7-like 2, T-cell specific, HMG-box (Tcf7l2), mRNA (10); cDNA FLJ59705, highly similar to Transcription factor 7-like 2 (224); Transcription factor 7-like 2 (T-cell specific, HMG-box), isoform CRA_k (344); cDNA FLJ54563, highly similar to Transcription factor 7-like 2 (266); cDNA FLJ59810, highly similar to …
EGGKSGKSPRRRA	0.82	0.24	Forkhead box protein O1 (248)
TVQEKEKYLNVSR	0.99	0.13	Eukaryotic translation elongation factor 1 epsilon-1 (138)
AIGKVLKLVPEKD	1.66	0.2	cDNA FLJ78119, highly similar to Homo sapiens G1 to S phase transition 1 (GSPT1), mRNA (493); cDNA, FLJ96276, highly similar to Homo sapiens G1 to S phase transition 1 (GSPT1), mRNA (493); cDNA FLJ55563, highly similar to Homo sapiens G1 to S phase transition 2 (GSPT2), mRNA (539); Eukaryotic peptide chain release factor GTP-binding subunit ERF3A (493); Eukaryotic peptide chain release factor GTP…
KKTAIHKALCDNV	1.99	0.21	cDNA FLJ75536, highly similar to Homo sapiens cysteinyl-tRNA synthetase (CARS), transcript variant1, mRNA (503); Putative uncharacterized protein CARS (493); cDNA FLJ59524, highly similar to Cysteinyl-tRNA synthetase (EC 6.1.1.16) (439); cDNA FLJ59563, highly similar to Cysteinyl-tRNA synthetase (EC 6.1.1.16) (516); cDNA FLJ54534, highly similar to Homo sapiens cysteinyl-tRNA synthetase (CARS), t…
KADINTKWAATRW	1.76	0.41	RPL14 protein (85); Putative uncharacterized protein RPL14P1 (85); cDNA FLJ76611, highly similar to Homo sapiens ribosomal protein L14 (RPL14), mRNA (85); cDNA FLJ75556, highly similar to Homo sapiens ribosomal protein L14, mRNA (85); cDNA FLJ51325, highly similar to 60S ribosomal protein L14 (85); Ribosomal protein L14 variant (85); 60S ribosomal protein L14 (85)
AEIEGLKGQRASL	1.22	0.2	cDNA FLJ77754, highly similar to Homo sapiens keratin 8 (KRT8), mRNA (325); Keratin, type II cytoskeletal 8 (325); KRT8 protein (121); KRT8 protein (207)
KGRFQQKQIENVL	1.13	0.23	Eukaryotic translation initiation factor 2 beta (265); Eukaryotic translation initiation factor 2 subunit 2 (265); Eukaryotic translation initiation factor 2 subunit 2-like protein (259); cDNA, FLJ93495, highly similar to Homo sapiens eukaryotic translation initiation factor 2, subunit 2 beta, 38kDa (EIF2S2), mRNA (265); EIF2S2 protein (146)
AAGADIKEMQNLS	1.66	0.35	Enoyl-CoA hydratase, mitochondrial (101)
KEVKGGKQEKVKQ	1.57	0.23	TRDN protein (226); cDNA FLJ75524, highly similar to Homo sapiens triadin (TRDN), mRNA (226); Putative uncharacterized protein TRDN (65); Putative uncharacterized protein TRDN (226); Triadin (64); Triadin (226)
TPSGAGKFPAGHS	1.92	0.57	Putative uncharacterized protein CBX8 (230); Putative uncharacterized protein CBX8 (215); Chromobox protein homolog 8 (240)
PVKYPDKFSQASK	2.18	0.47	G protein-coupled receptor kinase 1 (418); Rhodopsin kinase (418)
GVGGQEKHAPLAD	1.47	0.31	Bystin (15); Putative uncharacterized protein BYSL (15)
KKAQGPKGGGNAV	1.42	0.27	cDNA FLJ45703 fis, clone FEBRA2026582, moderately similar to Peptidyl-prolyl cis-trans isomerase NIMA-interacting 4 (EC 5.2.1.8) (32); Peptidyl-prolyl cis-trans isomerase NIMA-interacting 4 (32); Protein (Peptidylprolyl cis/trans isomerase) NIMA-interacting, 4 (Parvulin) (32); Protein (Peptidylprolyl cis/trans isomerase) NIMA-interacting, 4 (Parvulin) (61)
AILQIMKELNKRG	1.68	0.21	cDNA, FLJ94025, highly similar to Homo sapiens tripartite motif-containing 28 (TRIM28), mRNA (304); Transcription intermediary factor 1-beta (304)
PTAIIAKTFKGRG	1.19	0.2	cDNA FLJ36348 fis, clone THYMU2007025, highly similar to TRANSKETOLASE (EC 2.2.1.1) (158); cDNA FLJ54957, highly similar to Transketolase (EC 2.2.1.1) (249); cDNA FLJ53217, highly similar to Transketolase (EC 2.2.1.1) (43); cDNA FLJ56274, highly similar to Transketolase (EC 2.2.1.1) (194); Transketolase variant (241); Transketolase (241)
HADFIHKHVKGSR	1.32	0.51	Valacyclovir hydrolase (257); Putative uncharacterized protein BPHL (23)
DMHSAYKHADGKK	1.03	0.18	cDNA FLJ77404, highly similar to Homo sapiens small nuclear ribonucleoprotein 70kDa polypeptide (RNP antigen) (SNRP70), transcript variant 1, mRNA (162); U1 small nuclear ribonucleoprotein 70 kDa (162)
SVKKIEKMKEKRQ	0.92	0.14	SLIT-ROBO Rho GTPase activating protein 2 (230); cDNA FLJ61210, highly similar to SLIT-ROBO Rho GTPase-activating protein 2 (77); cDNA FLJ60271, highly similar to SLIT-ROBO Rho GTPase-activating protein 2 (230); SRGAP2 protein (230); SRGAP3:RAF1 fusion protein (220); SLIT-ROBO Rho GTPase-activating protein 2 (230); SLIT-ROBO Rho GTPase activating protein 2 (143); SRGAP3 protein (100); KIAA1156 pr…
ARNILEKHSLDAS	0.79	0.13	cDNA, FLJ92818, highly similar to Homo sapiens pyruvate dehydrogenase complex, component X (PDHX), mRNA (194); Pyruvate dehydrogenase protein X component, mitochondrial (194)
SGNLETKYKVCNY	0.97	0.08	Voltage-dependent anion-selective channel protein 3 (61)
LHALKEKVTSLPD	1.22	0.22	Putative uncharacterized protein C2orf47 (175); Uncharacterized protein C2orf47, mitochondrial (182)
RRSSVKKIEKMKE	1.1	0.18	SLIT-ROBO Rho GTPase activating protein 2 (227); cDNA FLJ61210, highly similar to SLIT-ROBO Rho GTPase-activating protein 2 (74); cDNA FLJ60271, highly similar to SLIT-ROBO Rho GTPase-activating protein 2 (227); SRGAP2 protein (227); SRGAP3:RAF1 fusion protein (217); SLIT-ROBO Rho GTPase-activating protein 2 (227); SLIT-ROBO Rho GTPase activating protein 2 (140); SRGAP3 protein (97); KIAA1156 pro…
TMTKIQKHQEHIL	1.34	0.2	cDNA, FLJ94025, highly similar to Homo sapiens tripartite motif-containing 28 (TRIM28), mRNA (340); Transcription intermediary factor 1-beta (340)
TVAQLVKRLTDAD	0.93	0.14	ATP synthase subunit alpha (211); ATP synthase subunit alpha, mitochondrial (261); ATP synthase subunit alpha (239)
TSVLFSKKNPKTA	1.13	0.34	Peregrin (896)
VPRRTLKMIQPSA	1.03	0.21	Putative uncharacterized protein GMNN (27); Geminin (27); Geminin variant (26)
SEEAYEKYIKSIE	0.8	0.09	Glycine cleavage system H protein, mitochondrial (166); cDNA, FLJ92251, Homo sapiens glycine cleavage system protein H (aminomethyl carrier) (GCSH), mRNA (166); GCSH protein (166); Mitochondrial glycine cleavage system H-protein (118)
LAAIVAKQVLLGR	0.73	0.12	cDNA FLJ51256, highly similar to 60S ribosomal protein L13a (25); Ribosomal protein L13a variant (25); Novel protein similar to ribosomal protein L13a RPL13A (25); RPL13A protein (23); 60S ribosomal protein L13a (25)
YGELIEKYIKEGK	0.8	0.09	cDNA, FLJ93091, Homo sapiens UMP-CMP kinase (UMP-CMPK), mRNA (87); cDNA FLJ53966, moderately similar to Homo sapiens cytidylate kinase (CMPK), mRNA (87); cDNA FLJ52483, highly similar to Homo sapiens cytidylate kinase (CMPK), mRNA (87); UMP-CMP kinase (55); Cytidine monophosphate (UMP-CMP) kinase 1, cytosolic (87)
FASFIDKVRFLEQ	0.74	0.1	cDNA FLJ78504, highly similar to Homo sapiens keratin 6A (KRT6A), mRNA (180); cDNA FLJ77754, highly similar to Homo sapiens keratin 8 (KRT8), mRNA (108); cDNA FLJ46620 fis, clone TLUNG2000654, highly similar to Keratin, type II cytoskeletal 7 (84); cDNA FLJ60438, highly similar to Homo sapiens keratin protein K6irs (K6IRS2), mRNA (142); cDNA FLJ60647, highly similar to Keratin, type II cytoskelet…
AESQILKHLLKNL	0.78	0.09	Nicotinamide N-methyltransferase (39); Nicotinamide N-methyltransferase, isoform CRA_a (39)
QSSHTSKYFGSID	0.79	0.08	Period 1 (1087); cDNA FLJ77255, highly similar to Homo sapiens period homolog 1 (Drosophila) (PER1), mRNA (1096); Period circadian protein homolog 1 (1096)
DCCKRQKDAENEF	1.27	0.25	DEPDC4 protein (174); DEP domain-containing protein 4 (174); DEP domain-containing protein 4. (107)
IGPDHDKFSAMKY	1.85	0.31	cDNA FLJ78273, highly similar to Homo sapiens protein kinase C substrate 80K-H (PRKCSH), transcript variant 2, mRNA (456); cDNA FLJ59211, highly similar to Glucosidase 2 subunit beta (466); Glucosidase 2 subunit beta (459)
YCNFRNKEIMFHV	1.84	0.36	Putative uncharacterized protein RAP1GAP (262); RAP1GAP protein (262); RAP1 GTPase activating protein (293); RAP1 GTPase activating protein (262); Rap1 GTPase-activating protein 1 (262)
KEEAFGKYCRPES	1.54	0.18	cDNA FLJ78360, highly similar to Homo sapiens signal transducer and activator of transcription 3 (acute-phase response factor) (STAT3), transcript variant 1, mRNA (685); cDNA FLJ59362, highly similar to Signal transducer and activator of transcription 3 (587); cDNA FLJ53413, highly similar to Signal transducer and activator of transcription 3 (614); Signal transducer and activator of transcriptio…
LAGNQDKRKEVLK	1.41	0.21	Alpha-2-macroglobulin (1162)
ISFNDKKFVIKPI	1.97	0.17	Radixin, isoform CRA_a (254); Putative uncharacterized protein MSN (253); cDNA, FLJ93349, Homo sapiens radixin (RDX), mRNA (254); cDNA, FLJ92973, highly similar to Homo sapiens villin 2 (ezrin) (VIL2), mRNA (254); cDNA FLJ58499, highly similar to Radixin (118); cDNA FLJ53435, highly similar to Ezrin (97); cDNA FLJ54141, highly similar to Ezrin (222); cDNA, FLJ78960, highly similar to Radixin (118…
DWLSSAKIHQKFG	2.03	0.41	Probable cation-transporting ATPase 13A4 (161); Putative uncharacterized protein ATP13A4 (161)
PAGFNCKDETEFR	1.75	0.37	UPF0568 protein C14orf166 (20); cDNA, FLJ92278 (20); CLE (20)
AKGFGGKYGVERD	1.02	0.14	cDNA FLJ54279, highly similar to Hematopoietic lineage cell-specific protein (123); cDNA FLJ59379, highly similar to Hematopoietic lineage cell-specific protein (123); cDNA FLJ59981, highly similar to Hematopoietic lineage cell-specific protein (123); Hematopoietic lineage cell-specific protein (123); HCLS1 protein (123)
MAQAEGKFAQKEE	1.06	0.28	WD repeat-containing protein 87 (1636)
ENEYIMKAIMRSF	1.15	0.18	Cellular apoptosis susceptibility protein variant 2 (518); cDNA FLJ54022, highly similar to Exportin-2 (365); cDNA FLJ59343, highly similar to Exportin-2 (475); cDNA FLJ59371, highly similar to Exportin-2 (263); cDNA FLJ56236, highly similar to Exportin-2 (172); cDNA FLJ53202, highly similar to Exportin-2 (357); Exportin-2 (574)
GEGVLTKECRKKA	1.22	0.17	cDNA FLJ55258, highly similar to Homo sapiens pleckstrin homology domain containing, family F member 1, mRNA (129); Pleckstrin homology domain-containing family F member 1 (44)
RNKISFKFDHLRK	1.28	0.28	cDNA FLJ75422, highly similar to Homo sapiens capping protein (actin filament) muscle Z-line, alpha 1, mRNA (97); Putative uncharacterized protein CAPZA1 (87); F-actin-capping protein subunit alpha-1 (97)
RSSLLEKGLDGAK	1.12	0.13	Dermcidin isoform 2 (68); Dermcidin (68); Proteolysis inducing factor (68)
AAPKMYKEEGLKA	1.05	0.2	cDNA, FLJ96465, highly similar to Homo sapiens solute carrier family 25 (mitochondrial carrier;phosphate carrier), member 3 (SLC25A3), nuclear gene encodingmitochondrial protein, transcript variant 1b, mRNA (208); Phosphate carrier protein, mitochondrial (209); Solute carrier family 25 member 3 isoform b variant (208); cDNA FLJ90278 fis, clone NT2RP1000325, highly similar to Phosphate carrier pro…
STGSIAKRLQSIG	0.98	0.13	Fructose-bisphosphate aldolase A (42)
IEHNLSKIMKLDN	1.41	0.21	cDNA FLJ75532, highly similar to Homo sapiens RAD50 homolog (S. cerevisiae) (RAD50), transcript variant 1, mRNA (264); RAD50 protein (264); DNA repair protein RAD50 (264)
RSERLAKYNQLLR	1.12	0.23	Enolase (107); Alpha-enolase (406); Enolase (156); Enolase (244)
NEEQIHKFDKQKL	1.34	0.11	cDNA FLJ56613, highly similar to Serine/threonine-protein kinase TBK1 (EC 2.7.11.1) (351); Serine/threonine-protein kinase TBK1 (584)
PEKFQSKYEPRSH	1.23	0.19	cDNA FLJ78033, highly similar to Homo sapiens protein disulfide isomerase family A, member 4, mRNA (366); Protein disulfide-isomerase A4 (366); Putative uncharacterized protein ERP70 (366)
ADPHNLKICCRVN	1.56	0.28	Fumarylacetoacetate hydrolase domain-containing protein 2A (234); Fumarylacetoacetate hydrolase domain-containing protein 2B (234)
ZZMAGEKVEKPDT	1.93	0.67	60S ribosomal protein L6 (7); cDNA FLJ51013, highly similar to 60S ribosomal protein L6 (7)
GCMDKGKELSGLG	1.45	0.22	Very long-chain specific acyl-CoA dehydrogenase, mitochondrial (482); Acyl-Coenzyme A dehydrogenase, very long chain, isoform CRA_e (406); cDNA FLJ32394 fis, clone SKMUS2000078, highly similar to Very-long-chain specific acyl-CoA dehydrogenase, mitochondrial (183); cDNA FLJ56425, highly similar to Very-long-chain specific acyl-CoAdehydrogenase, mitochondrial (EC 1.3.99.-) (528); cDNA FLJ55801, hi…
WKWKEEKGDRIYH	1.98	0.41	Valyl-tRNA synthetase (341); Valyl-tRNA synthetase (423); cDNA FLJ50305, highly similar to Valyl-tRNA synthetase (EC 6.1.1.9) (128)
ILLSADKYEIKIW	1.19	0.17	cDNA, FLJ95158, Homo sapiens F-box and WD-40 domain protein 2 (FBXW2), mRNA (298); cDNA FLJ53609, highly similar to F-box/WD repeat protein 2 (169); F-box/WD repeat-containing protein 2 (298); F-box and WD repeat domain containing 2 (169)
HGGLINKKCYEMA	1.26	0.27	Profilin-1 (126); Profilin (126)
SCQEGDKFKLSKG	0.98	0.21	S100 calcium binding protein A2 (26); Protein S100-A2 (27)
ASPQTAKPTAVPP	0.96	0.16	Cyclic nucleotide gated channel beta 3 (166); Putative uncharacterized protein CNGB3 (166); Cyclic nucleotide-gated cation channel beta-3 (166)
CDDKRHKDIWSKE	0.87	0.14	cDNA FLJ51551, highly similar to Bifunctional heparan sulfateN-deacetylase/N-sulfotransferase 2 (EC 2.8.2.8) (114); cDNA FLJ56131, highly similar to Bifunctional heparan sulfateN-deacetylase/N-sulfotransferase 2 (EC 2.8.2.8) (261); cDNA FLJ60351, highly similar to Bifunctional heparan sulfateN-deacetylase/N-sulfotransferase 2 (EC 2.8.2.8) (217); cDNA FLJ57166, highly similar to Bifunctional hepar…
KAVRGAKGHHHPH	1.44	0.18	Mothers against decapentaplegic homolog 7 (70)
FNRTVSKVDDFLA	0.92	0.17	6-phosphogluconate dehydrogenase, decarboxylating (38); 6-phosphogluconate dehydrogenase, decarboxylating (25)
MTITEQKYEGEYR	1.12	0.24	ATP-binding cassette sub-family D member 3 (260); cDNA FLJ53353, highly similar to ATP-binding cassette sub-family D member 3 (284); cDNA FLJ54042, highly similar to ATP-binding cassette sub-family D member 3 (187)
QTEGFRKRWFTMD	1.14	0.41	cDNA FLJ77789 (200); Arf-GAP with dual PH domain-containing protein 1 (272); cDNA FLJ35152 fis, clone PLACE6010732, highly similar to Centaurin-alpha 1 (200); cDNA FLJ42989 fis, clone BRTHA2009803, highly similar to Centaurin-alpha 1 (98); cDNA FLJ54163, highly similar to Centaurin-alpha 1 (158); cDNA FLJ54168, highly similar to Centaurin-alpha 1 (177); cDNA FLJ59765, highly similar to Centaurin-…
EAVSICKGLMTKH	1.07	0.17	Protein kinase C, alpha (570); Protein kinase C alpha type (570)
LKEMFAKKHAAYA	1.07	0.1	Bromodomain-containing protein 4 (367); BRD4 protein (367); Bromodomain containing 4, isoform CRA_b (367)
QKGEVYKAQIMNV	1.19	0.2	cDNA FLJ57294, highly similar to Lipoamide acyltransferase component of branched-chain alpha-keto acid dehydrogenase complex, mitochondrial (EC 2.3.1.168) (259); Lipoamide acyltransferase component of branched-chain alpha-keto acid dehydrogenase complex, mitochondrial (440)
GPVMYGKLPRLET	1.25	0.31	Uncharacterized protein C15orf39 (17)
SDESAAKKPKWDD	1.67	0.39	Pumilio domain-containing protein KIAA0020 (106)
VFQKYTKYSKHDM	1.2	0.48	Annexin A1 (242); cDNA FLJ51887, highly similar to Annexin A1 (117); Annexin I (242); Annexin A1, isoform CRA_a (242)
VQFEPSKGAIGKA	0.91	0.24	Putative uncharacterized protein GARS (8); Glycyl-tRNA synthetase (501)
PPEKPRKHDSGAA	1.49	0.91	Putative uncharacterized protein C15orf63 (35); Huntingtin-interacting protein K (81)
RTHLNDKYGYZZZ	1.47	0.6	cDNA FLJ53855, highly similar to Kanadaptin (487); Kanadaptin (793)
AEGGGAKFKKYEE	1.16	0.21	Elongation factor Tu, mitochondrial (88)
ISADTHKYGYAPK	1.57	0.42	Sphingosine-1-phosphate lyase 1 (353)
TESSMYKYPSDIS	1.91	0.49	EWS/FLI fusion protein (426); cDNA FLJ52260, highly similar to Friend leukemia integration 1 transcription factor (187); cDNA FLJ53915, highly similar to Friend leukemia integration 1 transcription factor (347); Friend leukemia integration 1 transcription factor (380); Ewings sarcoma EWS-Fli1 (Type 1) oncogene (404)
DGTLFQKSGVISG	0.71	0.12	cDNA FLJ77162, highly similar to Homo sapiens SMC1 structural maintenance of chromosomes 1-like 1 (SMC1L1), mRNA (648); cDNA FLJ50250, highly similar to Structural maintenance of chromosome 1-like 1 protein (414); Putative uncharacterized protein DKFZp686L19178 (626); SMC1A protein (648); Structural maintenance of chromosomes protein 1A (648)
KFYHDAKEIFGRI	0.64	0.13	Spectrin, beta, non-erythrocytic 1, isoform CRA_d (1815); Spectrin beta chain, brain 1 (1815)
ARDMNGKSLDGKA	0.7	0.27	cDNA FLJ76931, highly similar to Homo sapiens testes-specific heterogenous nuclear ribonucleoprotein G-T, mRNA (72); cDNA FLJ54953, highly similar to Heterogeneous nuclear ribonucleoprotein G (33); RNA-binding motif protein, X-linked-like-2 (72); Heterogeneous nuclear ribonucleoprotein G (72); RBM1 (72); RNA binding motif protein, X-linked-like 1 (72); cDNA FLJ38696 fis, clone KIDNE2001931, highl…
GSTEVGKLIKEAA	0.84	0.12	Retinal dehydrogenase 1 (252); cDNA FLJ51786, highly similar to Retinal dehydrogenase 1 (EC 1.2.1.36) (173); cDNA FLJ50286, highly similar to Retinal dehydrogenase 1 (EC 1.2.1.36) (177); Aldehyde dehydrogenase 1A1 variant (266)
KHAFSLKQLDNPA	0.61	0.14	Ubiquitin carboxyl-terminal hydrolase 5 (184)
SKGFGGKYGIDKD	0.59	0.09	Putative uncharacterized protein CTTN (180); Cortactin isoform a variant (198); Cortactin (198); Cortactin, isoform CRA_a (198); Cortactin, isoform CRA_c (198); Src substrate cortactin (198)
DILSFDKIKEQRE	0.72	0.12	Scaffold attachment factor B2 (616)
PSTPYTKSKRGHR	0.84	0.14	cDNA FLJ55615, highly similar to SWI/SNF-related matrix-associatedactin-dependent regulator of chromatin subfamily C member 2 (215); SWI/SNF-related matrix-associated actin-dependent regulator of chromatin c2 isoform b variant (331); SWI/SNF-related matrix-associated actin-dependent regulator of chromatin c2 isoform b variant (338); SWI/SNF complex subunit SMARCC2 (326)
LRILYTKILDVLE	0.82	0.16	Putative uncharacterized protein NDUFA5 (40); Putative uncharacterized protein NDUFA5 (30); Putative uncharacterized protein NDUFA5 (26); NADH dehydrogenase [ubiquinone] 1 alpha subcomplex subunit 5 (30); Putative uncharacterized protein DKFZp781K1356 (30)
EKVLNSKTIRSNS	0.84	0.14	Serine/threonine-protein kinase Nek9 (731); NEK9 protein (74)
KDSGKAKAKAVSR	0.84	0.1	Histone H2A (14); Histone H2A.V (14)
GGGGKWKREEGGG	0.49	0.09	Choline O-acetyltransferase (18); Choline acetyltransferase (18)
KQELAKKEIDVIS	0.53	0.12	cDNA FLJ75664, highly similar to Homo sapiens kinesin family member 2C (KIF2C), mRNA (276); cDNA FLJ54088, highly similar to Kinesin-like protein KIF2C (235); cDNA FLJ53680, highly similar to Kinesin-like protein KIF2C (163); Kinesin-like protein KIF2C (276); Kinesin family member 2C (267); Kinesin family member 2C (235); Putative uncharacterized protein (19)
SRGASNKYLVEFR	1.57	0.51	Proteasomal ubiquitin receptor ADRM1 (21); cDNA FLJ56666, highly similar to Adhesion-regulating molecule 1 (21); Putative uncharacterized protein DKFZp686G2045 (21)
LREMQDKVLDMEK	1.37	0.29	Ecotropic viral integration site 5-like (495); EVI5-like protein (484)
KGEKIPKGKKGKA	1.15	0.18	NA
NNHGKSKTCCENK	1.47	0.47	Chromosome 6 open reading frame 150 (394); Uncharacterized protein C6orf150 (394)
EIKRVGKDSFWAK	0.79	0.1	cDNA FLJ59450, highly similar to Drebrin-like protein (151); cDNA FLJ52531, highly similar to Drebrin-like protein (127); cDNA FLJ54066, highly similar to Drebrin-like protein (106); cDNA FLJ59481, highly similar to Drebrin-like protein (73); cDNA FLJ54071, highly similar to Drebrin-like protein (114); cDNA FLJ59941, highly similar to Drebrin-like protein (114); cDNA FLJ59432, highly similar to D…
YRYYDPKTCGFDF	0.93	0.26	Aspartate aminotransferase (185); Aspartate aminotransferase, mitochondrial (185); Aspartate aminotransferase (126); Aspartate aminotransferase (142)
ASEIGEKYRKQPC	1.15	0.25	Uncharacterized protein KIAA0947 (1218)
QASLYGKRRSQKE	1.09	0.16	cDNA FLJ57671, highly similar to SWI/SNF-related matrix-associated actin-dependent regulator of chromatin subfamily C member 1 (245); SMARCC1 protein (354); SWI/SNF related, matrix associated, actin dependent regulator of chromatin, subfamily c, member 1 (354); SWI/SNF complex subunit SMARCC1 (354)
PGSALEKEVESMG	0.77	0.19	Cytochrome b-c1 complex subunit 1, mitochondrial (111)
YKSDSGKPYYYNS	0.61	0.12	cDNA FLJ59286, highly similar to Pre-mRNA-processing factor 40 homolog A (116); Putative uncharacterized protein PRPF40A (122); Pre-mRNA-processing factor 40 homolog A (196); PRPF40A protein (154)
QPESAEKHVTQRL	1.02	0.24	Apoptotic chromatin condensation inducer in the nucleus (717); ACIN1 protein (717); cDNA FLJ50838, highly similar to Apoptotic chromatin condensation inducer in thenucleus (621); Putative uncharacterized protein DKFZp667N107 (110)
RQCVVDKDKRNQC	1.11	0.16	Hepatocyte nuclear factor 4, alpha (97); Hepatocyte nuclear factor 4, gamma (58); HNF4alpha10/11/12 (81); Putative uncharacterized protein HNF4A (71); Hepatocyte nuclear factor 4-alpha (106); Hepatocyte nuclear factor 4-gamma (58); Hepatocyte nuclear factor 4, alpha, isoform CRA_c (99); Hepatocyte nuclear factor 4, alpha (84); HNF4G protein (58)
VTQFGNKYIQQTK	1.43	0.2	cDNA, FLJ93125, highly similar to Homo sapiens cleavage and polyadenylation specific factor 5, 25 kDa(CPSF5), mRNA (23); Cleavage and polyadenylation specificity factor subunit 5 (23); Putative uncharacterized protein DKFZp313O211 (23)
GTISNGKNPPTLK	1.14	0.32	A disintegrin and metalloproteinase with thrombospondin motifs 12 (1014)
PRLKEMKSQESAA	1.3	0.18	Neuregulin 1 variant fetal b IV-beta 1a (22); Neuregulin 1 variant fetal c IV 2 (22); Neuregulin 1 type IV fetal A beta 1a (22); Neuregulin 1 type IV fetal C beta 1a (22); Heregulin-beta 3 protein isoform (42); Heregulin-gamma protein isoform 1 (42); Heregulin-gamma protein isoform 2 (42); Neuregulin 1 isoform ndf43-beta2 (42); Neuregulin 1 isoform ndf43 (43); cDNA FLJ61326, highly similar to Pro…
MGYMMAKKHLEIN	1.85	0.36	cDNA FLJ77842 (261); cDNA FLJ53619, highly similar to Heat shock protein HSP 90-beta (613); cDNA FLJ54023, highly similar to Heat shock protein HSP 90-beta (585); Putative heat shock protein HSP 90-beta-3 (496); Heat shock protein HSP 90-beta (623); Heat shock protein 90Be (7); cDNA: FLJ21717 fis, clone COL10322 (261)
PKSFFSKQPVRNK	1.7	0.54	Signal-induced proliferation-associated 1 like 3 (1448); Signal-induced proliferation-associated 1-like protein 3 (1448)
RWYNHIKSYEKEK	1.75	0.54	Similar to eukaryotic translation elongation factor 1 beta 2; eukaryotic translation elongation factor 1 beta 1 (60); Putative uncharacterized protein EEF1B2 (60); Elongation factor 1-beta (60)
GKHMWTKKDAGKK	1.23	0.18	Cysteine and histidine-rich domain-containing protein 1 (220)
KEVERKKLELDGE	1.66	0.21	Putative uncharacterized protein ADD2 (270); Beta-adducin (576); Putative uncharacterized protein ADD2 (328); ADD2 protein (576); Similar to adducin 2 (Beta) (132)
GFEYQGKTEKHAS	1.47	0.18	Putative uncharacterized protein CTTN (126); Cortactin isoform a variant (144); Cortactin (144); Cortactin, isoform CRA_a (144); Cortactin, isoform CRA_c (144); Src substrate cortactin (144)
EASLKRKAEEKLE	1.34	0.37	Putative uncharacterized protein CCDC75 (15); Putative uncharacterized protein CCDC75 (119); Coiled-coil domain-containing protein 75 (123)
PAPKKHKLNPEYF	1.42	0.29	cDNA FLJ58640, highly similar to Calmodulin-binding transcription activator 1 (334); Putative uncharacterized protein CAMTA1 (1077); Calmodulin-binding transcription activator 1 (1247); CAMTA1 protein (203)
KGKGKKKGKVKEE	1.74	0.62	Putative uncharacterized protein TRPM1 (436); Putative uncharacterized protein TRPM1 (430); Transient receptor potential cation channel subfamily M member 1 (436)
PSDLAKKKAAKKK	1.71	0.31	ATP-binding cassette sub-family F member 2 (8); Putative uncharacterized protein ABCF2 (8)
QVKSKAKKTVDKH	1.75	0.31	CCAAT/enhancer-binding protein beta (264); NF-IL6 (25); CEBPB protein (56)
MRPVKHKWTMISR	1.04	0.15	Immunoglobulin superfamily member 10 (471)
NLIFRLKDLDFAS	0.96	0.18	ATP-dependent RNA helicase DDX55 (444); DDX55 protein (51)
LIEEVRKARGKKR	1.24	0.16	Cyclic AMP-dependent transcription factor ATF-4 (343); cDNA FLJ58799, highly similar to Cyclic AMP-dependent transcription factor ATF-4 (259); ATF4 protein (343); Activating transcription factor 4 (Tax-responsive enhancer element B67), isoform CRA_a (343)
MKIMKGKAEAKKI	1.35	0.25	cDNA FLJ78753, highly similar to Homo sapiens zinc fingers and homeoboxes 3 (ZHX3), mRNA (193); Zinc fingers and homeoboxes 3 (193); ZHX3 protein (193); Zinc fingers and homeoboxes protein 3 (193)
VPDQRSKFENEEF	1.28	0.24	cDNA FLJ76413, highly similar to Homo sapiens core-binding factor, beta subunit (CBFB), transcript variant 1, mRNA (11); Core-binding factor subunit beta (11)
AQVTQTKFLPNAP	1.5	0.24	cDNA, FLJ94573, Homo sapiens DEAD (Asp-Glu-Ala-Asp) box polypeptide 1 (DDX1), mRNA (281); cDNA FLJ57326, highly similar to ATP-dependent RNA helicase DDX1 (EC 3.6.1.-) (153); cDNA FLJ51017, highly similar to ATP-dependent RNA helicase DDX1 (EC 3.6.1.-) (189); cDNA FLJ51031, highly similar to ATP-dependent RNA helicase DDX1 (EC 3.6.1.-) (265); ATP-dependent RNA helicase DDX1 (281)
KVQSKNKYLHSPE	1.33	0.39	MYST4 protein (752); MYST histone acetyltransferase (Monocytic leukemia) 4 (1044); Histone acetyltransferase MYST4 (1044)
GGQYFAKPRNQGG	0.74	0.18	Putative uncharacterized protein HNRNPA1P4 (177); cDNA FLJ51587, highly similar to Heterogeneous nuclear ribonucleoprotein A1 (151); cDNA FLJ51586, moderately similar to Heterogeneous nuclear ribonucleoprotein A1 (232); Putative uncharacterized protein ENSP00000383298 (245); Putative uncharacterized protein ENSP00000393546 (152); HNRPA1 protein (145); Heterogeneous nuclear ribonucleoprotein A1 (2…
NTSKVVKLEKNLQ	0.61	0.15	Myb-related protein A (704)
LKDWFAKRKKFKR	0.99	0.16	cDNA FLJ54005, highly similar to Transcription elongation factor SPT5 (120); cDNA FLJ55629, highly similar to Transcription elongation factor SPT5 (306); Suppressor of Ty 5 homolog (S. cerevisiae), isoform CRA_a (187); Transcription elongation factor SPT5 (328)
RKLIFIKKKRDSP	0.95	0.13	Plakophilin-3 (752)
GSGSKGKGGEIQP	0.81	0.14	Putative uncharacterized protein HSPE1 (56); Putative uncharacterized protein ENSP00000398885 (49); 10 kDa heat shock protein, mitochondrial (56); Chaperonin 10-related protein (55)
SPGNKGKGKGKGK	1.13	0.22	Cytosine-specific methyltransferase (35); DNA (cytosine-5)-methyltransferase 1 (1111); Cytosine-specific methyltransferase (1098)
VRKELNKILEGRS	1.27	0.2	cDNA FLJ50978, highly similar to Dihydrolipoyllysine-residue acetyltransferasecomponent of pyruvate dehydrogenase complex, mitochondrial (EC 2.3.1.12) (410); cDNA FLJ57320, highly similar to Dihydrolipoyllysine-residue acetyltransferase component of pyruvate dehydrogenase complex, mitochondrial (EC 2.3.1.12) (247); cDNA FLJ51063, highly similar to Dihydrolipoyllysine-residue acetyltransferasecomp…
VPLHYLKPNSFVK	0.88	0.12	UPF0557 protein C10orf119 (61)
ARTPRSKKKKKLG	0.78	0.22	TCOF1 protein (1324); cDNA FLJ57828, highly similar to Treacle protein (834); cDNA FLJ57346, highly similar to Homo sapiens Treacher Collins-Franceschetti syndrome 1 (TCOF1), transcript variant 1, mRNA (1325); Putative uncharacterized protein DKFZp434G1035 (34); Treacle protein (1362)
SRRDLEKLVRRLL	0.77	0.15	Rho guanine nucleotide exchange factor 6 (751); Rac/Cdc42 guanine nucleotide exchange factor (GEF) 6, isoform CRA_b (597); cDNA FLJ50776, highly similar to Rho guanine nucleotide exchange factor 6 (624); Similar to Rac/Cdc42 guanine nucleotide exchange factor (GEF) 6 (295)
QLTKGCKVRDHMV	0.8	0.2	Uncharacterized protein KIAA1841 (458)
NLMIQNKDDLARI	0.49	0.08	cDNA FLJ78564, highly similar to Homo sapiens aldehyde dehydrogenase 5 family, member A1 (succinate-semialdehyde dehydrogenase) (ALDH5A1), nuclear gene encoding mitochondrial protein, transcript variant 2, mRNA (135); cDNA FLJ53865, highly similar to Succinate semialdehyde dehydrogenase, mitochondrial (EC 1.2.1.24) (47); Succinic semialdehyde dehydrogenase (135); Succinic semialdehyde dehydrogena…
AVCDASKVVTVFS	0.37	0.12	Putative uncharacterized protein WDR1 (512); cDNA FLJ45763 fis, clone N1ESE2000698, highly similar to WD repeat protein 1 (476); cDNA FLJ58303, highly similar to WD repeat protein 1 (346); cDNA FLJ59130, moderately similar to Homo sapiens WD repeat domain 1 (WDR1), transcript variant 2, mRNA (81); WD repeat domain 1, isoform CRA_a (511); WD repeat-containing protein 1 isoform 1 variant (511); WD …
QLREALKILAERV	0.65	0.22	EMI domain containing 1 (364); Putative uncharacterized protein EMID2 (370); EMI domain-containing protein 1 (383); Collagen alpha-1(XXVI) chain (372)
ILEIRTKNFIFRT	0.55	0.16	Aryl hydrocarbon receptor (283)
NMEELKKEVVMDD	0.52	0.12	Sodium/potassium-transporting ATPase subunit alpha-4 (45); ATPase Na+/K+ transporting alpha 4 (16)
LRFGGTKTDFLIF	0.49	0.09	Heparanase (98); cDNA PSEC0090 fis, clone PLACE1001300, highly similar to Heparanase (EC 3.2.-.-) (98); Heparanase exon 9&10 deletion variant (98); Heparanase exon10-deletion variant (98)
EMNYIQKTLFKIG	0.59	0.1	Long-chain-fatty-acid--CoA ligase 4 (397); cDNA FLJ57028, highly similar to Long-chain-fatty-acid--CoA ligase 4 (EC 6.2.1.3) (336); Acyl-CoA synthetase long-chain family member 4, isoform CRA_b (356); Acyl-CoA synthetase 4 (356)
GMIFYRKGVAVAL	0.84	0.15	NA
KGYQWLKDKILSE	0.68	0.12	cDNA FLJ77679, highly similar to Homo sapiens potassium voltage-gated channel, shaker-related subfamily, beta member 2 (KCNAB2), transcript variant 1, mRNA (274); cDNA, FLJ79460, highly similar to Voltage-gated potassium channel subunitbeta-2 (252); cDNA, FLJ79507, highly similar to Voltage-gated potassium channel subunitbeta-2 (207); cDNA, FLJ92727, highly similar to Homo sapiens potassium volta…
GNPFDSKTEQGPQ	0.57	0.11	Aldehyde dehydrogenase, mitochondrial (355); cDNA FLJ50888, highly similar to Aldehyde dehydrogenase, mitochondrial (EC 1.2.1.3) (308); ALDH2 (208); Mitochondrial aldehyde dehydrogenase 2 variant (355)
LKDGEAKIKSDYA	0.68	0.14	cDNA FLJ51804, highly similar to Vacuolar ATP synthase catalytic subunit A, ubiquitous isoform (EC 3.6.3.14) (563); cDNA FLJ53889, highly similar to Vacuolar ATP synthase catalytic subunit A, ubiquitous isoform (EC 3.6.3.14) (313); V-type proton ATPase catalytic subunit A (596)
IAGFLQKNKAGGM	0.45	0.14	Methylmalonyl-CoA epimerase, mitochondrial (114); Putative uncharacterized protein MCEE (114)
AVAKADKLAEEHS	0.4	0.11	ATP synthase subunit beta, mitochondrial (522)
KPKEGVKTENDHI	0.56	0.12	Putative uncharacterized protein SUMO3 (11); SMT3 suppressor of mif two 3 homolog 3 (Yeast), isoform CRA_d (11); cDNA FLJ57440, moderately similar to Small ubiquitin-related modifier 3 (11); Small ubiquitin-related modifier 3 (11)
KDAGLAKSIGVSN	0.74	0.32	Putative uncharacterized protein AKR1C1 (163); Aldo-keto reductase family 1 member C1 (161); Aldo-keto reductase family 1 member C2 (161); Aldo-keto reductase family 1 member C3 (161); Aldo-keto reductase family 1 member C4 (161); cDNA FLJ52680, highly similar to Aldo-keto reductase family 1 member C2 (EC 1.-.-.-) (135); Aldo-keto reductase family 1, member C3 (3-alpha hydroxysteroid dehydrogenas…
KPAPEKKPAEKKP	0.71	0.19	cDNA FLJ50994, moderately similar to 60S ribosomal protein L4 (224); Ribosomal protein L4 variant (412); Ribosomal protein L4 variant (426); 60S ribosomal protein L4 (412)
PLKVNSKEENGIP	0.75	0.15	cDNA FLJ76209, highly similar to Homo sapiens inorganic pyrophosphatase 2 (PPA2), transcript variant 2, mRNA (42); cDNA FLJ60819, highly similar to Inorganic pyrophosphatase 2, mitochondrial (EC 3.6.1.1) (73); Inorganic pyrophosphatase 2, mitochondrial (73)
SLINVRKRNVESG	0.59	0.09	Phosphoglycerate mutase 5, long isoform (75); Putative uncharacterized protein PXMP2 (75); Serine/threonine-protein phosphatase PGAM5, mitochondrial (75)
WPVELRKVMSSIV	0.43	0.17	Arf-GAP with GTPase, ANK repeat and PH domain-containing protein 6 (507); Putative uncharacterized protein AGAP6 (530)
LRGMGWKPGEGIG	0.56	0.11	G patch domain and KOW motifs-containing protein (178)
QNGQEEKWCEKAV	0.77	0.07	cDNA FLJ50177, highly similar to Mothers against decapentaplegic homolog 2(SMAD 2) (39); cDNA, FLJ93422, Homo sapiens MAD, mothers against decapentaplegic homolog 2(Drosophila) (MADH2), mRNA (39); Mothers against decapentaplegic homolog 2 (39); Mothers against decapentaplegic homolog 3 (29)
SSAFVGKTPEASP	0.88	0.16	cDNA, FLJ92896, highly similar to Homo sapiens proteasome (prosome, macropain) 26S subunit, non-ATPase, 1 (PSMD1), mRNA (310); 26S proteasome non-ATPase regulatory subunit 1 (310); PSMD1 protein (310)
FLGVRPKNQPIAT	0.9	0.14	Nuclear receptor binding SET domain protein 1 (1817); Histone-lysine N-methyltransferase, H3 lysine-36 and H4 lysine-20 specific (2086); Putative uncharacterized protein DKFZp666C163 (271); cDNA FLJ30625 fis, clone CTONG2001820, highly similar to Mus musculus NSD1 protein mRNA (1049); cDNA: FLJ22413 fis, clone HRC08475 (459); cDNA: FLJ22263 fis, clone HRC03036 (89)
RYLSAQKPLLNDG	0.99	0.15	Carnitine O-palmitoyltransferase 2, mitochondrial (69)
LLPEAKKPRLLHG	1.12	0.19	cDNA FLJ77752 (481); cDNA FLJ32090 fis, clone OCBBF2000719, highly similar to Homo sapiens cleavage and polyadenylation specific factor 3-like, transcript variant 1, mRNA (481); cDNA FLJ55759, highly similar to Homo sapiens cleavage and polyadenylation specific factor 3-like, transcript variant 1, mRNA (446); Putative uncharacterized protein CPSF3L (377); Integrator complex subunit 11 (475)
THVVFGKVKEGIN	1.02	0.18	Peptidylprolyl isomerase A (Cyclophilin A) (PPIA) pseudogene (141)
KAKIQDKEGIPPD	0.81	0.12	cDNA FLJ75516, highly similar to Xenopus tropicalis ubiquitin C, mRNA (33); cDNA, FLJ96793, Homo sapiens ribosomal protein S27a (RPS27A), mRNA (33); cDNA FLJ51326, highly similar to Homo sapiens ubiquitin B (UBB), mRNA (33); cDNA, FLJ95576, Homo sapiens ubiquitin A-52 residue ribosomal protein fusionproduct 1 (UBA52), mRNA (33); RPS27A protein (33); Ubiquitin C variant (49); Ubiquitin C splice va…
KGVKIDKTDYMVG	0.66	0.21	Putative uncharacterized protein ARHGDIA (141); Rho GDP-dissociation inhibitor 1 (141)
LLRHIVKEFKRET	0.6	0.12	cDNA FLJ51811, highly similar to Stress-70 protein, mitochondrial (219); cDNA FLJ51903, highly similar to Stress-70 protein, mitochondrial (241); cDNA FLJ51907, highly similar to Stress-70 protein, mitochondrial (274); Stress-70 protein, mitochondrial (288); Heat shock 70 kDa protein 9B (156); HSPA9 protein (290)
LRTFYEKRMATEV	0.33	0.11	cDNA, FLJ92127, Homo sapiens ribosomal protein S6 (RPS6), mRNA (30); Ribosomal protein S6 (30); 40S ribosomal protein S6 (30)
NDFQLGKEFSMAR	0.8	0.15	cDNA FLJ58450, highly similar to Inhibitor of growth protein 3 (249); Inhibitor of growth protein 3 (264); Transcriptional regulator ING2 (264)
TKANFDKESERHF	0.55	0.14	cDNA, FLJ95650, highly similar to Homo sapiens karyopherin (importin) beta 1 (KPNB1), mRNA (211); cDNA FLJ50625, highly similar to Importin beta-1 subunit (66); cDNA FLJ50715, highly similar to Importin beta-1 subunit (66); cDNA, FLJ79320, highly similar to Importin beta-1 subunit (66); Importin subunit beta-1 (211)
PNQLRWKPFEIPK	0.87	0.15	cDNA FLJ78087, highly similar to Homo sapiens homogentisate 1,2-dioxygenase (homogentisate oxidase) (HGD), mRNA (98); Putative uncharacterized protein HGD (57); Homogentisate 1,2-dioxygenase (98); Homogentisate 1,2-dioxygenase (Homogentisate oxidase) (98)
LPKKPPKPEFGKL	0.95	0.19	PML-RARA-regulated adapter molecule 1 (38)
PISDSPKPPPQRV	0.74	0.26	6-phosphogluconolactonase (180)
FLQRFFKFSRDVF	0.8	0.19	Aspartate aminotransferase (150); Aspartate aminotransferase, mitochondrial (150); Aspartate aminotransferase (91); Aspartate aminotransferase (107)
DITDPEKPHQPKK	0.97	0.29	cDNA FLJ31479 fis, clone NT2NE2001634, moderately similar to NADH-UBIQUINONE OXIDOREDUCTASE 9 KD SUBUNIT (EC 1.6.5.3) (206)
FRSYYLKPSKMNE	0.78	0.15	cDNA FLJ58863, highly similar to Protein NipSnap3A (45); Protein NipSnap homolog 3A (45)
QQVPFAKPLPTFA	1.01	0.25	Putative uncharacterized protein EP400 (2313); Putative uncharacterized protein EP400 (2312); Putative uncharacterized protein EP400 (2276); E1A-binding protein p400 (2349)
KRENSRKPNLEKH	1.01	0.12	cDNA FLJ59639 (961); Putative uncharacterized protein DKFZp434M131 (138)
TGARKWKDPLTQM	0.7	0.15	cDNA FLJ16254 fis, clone HLUNG2015418, highly similar to Homo sapiens Cadherin (789); cDNA FLJ54530, weakly similar to Cadherin-related tumor suppressor homolog (714); Cadherin-like protein 28 (802)
GYYDYVKPRLRTT	0.84	0.14	cDNA FLJ53308, highly similar to 2-oxoglutarate dehydrogenase E1 component, mitochondrial (EC 1.2.4.2) (921); cDNA FLJ53323, highly similar to 2-oxoglutarate dehydrogenase E1 component, mitochondrial (EC 1.2.4.2) (803); cDNA FLJ59557, highly similar to 2-oxoglutarate dehydrogenase E1 component, mitochondrial (EC 1.2.4.2) (820); cDNA FLJ54570, highly similar to 2-oxoglutarate dehydrogenase E1 comp…
KFSGFGKIFKPWK	0.75	0.15	Putative uncharacterized protein PHACTR4 (41); Phosphatase and actin regulator 4 (42)
NFEPGKKNFLHLT	0.71	0.11	Ubiquitin carboxyl-terminal hydrolase (122); Ubiquitin carboxyl-terminal hydrolase (34); Ubiquitin carboxyl-terminal hydrolase 47 (122)
HVNCTIKELRRLF	0.93	0.14	Putative uncharacterized protein RTN4 (128); NOGO-A (427); Putative uncharacterized protein RTN4 (99); RTN4 protein (255); Reticulon 4, isoform CRA_d (111); Reticulon 4, isoform CRA_a (285); Reticulon 4, isoform CRA_f (898); Reticulon-4 (1104)
LTHSRKKPYVSKQ	0.9	0.18	Zinc finger protein 705F (142)
AQIMAYKMLARGQ	1.01	0.16	SMARCA4 protein (188); SWI/SNF related, matrix associated, actin dependent regulator of chromatin, subfamily a, member 4, isoform CRA_a (188); SMARCA4 isoform 3 (188); SMARCA4 isoform 2 (188); SMARCA4 isoform 4 (188); SWI/SNF related, matrix associated, actin dependent regulator of chromatin, subfamily a, member 4, isoform CRA_f (188); SWI/SNF-related matrix-associated actin-dependent regulator o…
IQEAIKKPLTQKR	1	0.22	SMARCD2 protein (186); Putative uncharacterized protein SMARCD2 (138); SWI/SNF related, matrix associated, actin dependent regulator of chromatin, subfamily d, member 2, isoform CRA_b (186); SMARCD2 protein (149); SWI/SNF-related matrix-associated actin-dependent regulator of chromatin subfamily D member 2 (111)
HLGPTLKPTLATR	0.88	0.19	cDNA FLJ75178, highly similar to Homo sapiens methyl-CpG binding protein splice variant 1 (MBD1) mRNA (422); cDNA FLJ55972, highly similar to Methyl-CpG-binding domain protein 1 (473); cDNA FLJ55386, highly similar to Homo sapiens methyl-CpG binding domain protein 1 (MBD1), transcript variant 4, mRNA (366); cDNA FLJ60940, highly similar to Methyl-CpG-binding domain protein 1 (447); Methyl-CpG-bin…
KAVGWEKNQKGGM	0.83	0.18	Autophagy-related protein 7 (306); cDNA, FLJ95321, highly similar to Homo sapiens ATG7 autophagy related 7 homolog (S. cerevisiae) (ATG7), mRNA (306); cDNA FLJ90740 fis, clone PLACE1011045, highly similar to Autophagy-related protein 7 (306); cDNA FLJ53475, highly similar to Autophagy-related protein 7 (284); cDNA FLJ53485, highly similar to Autophagy-related protein 7 (267); Putative uncharacter…
ETFRNLKYEVRNK	1	0.19	Putative uncharacterized protein CASP3 (91); Putative uncharacterized protein CASP3 (82); Caspase-3 (82)
YLCESQKFGELVM	0.67	0.09	cDNA FLJ53969, highly similar to Trifunctional enzyme subunit alpha, mitochondrial (136); cDNA FLJ54509, highly similar to Trifunctional enzyme subunit alpha, mitochondrial (280); Trifunctional enzyme subunit alpha, mitochondrial (326); Putative uncharacterized protein HADHA (100)
LKDHWQKYGRNFF	0.8	0.17	cDNA FLJ50439, highly similar to Phosphoglucomutase-1 (EC 5.4.2.2) (222); cDNA FLJ50606, highly similar to Phosphoglucomutase-1 (EC 5.4.2.2) (222); Phosphoglucomutase-1 (419)
PPGLAVKELKZZZ	0.76	0.43	60S ribosomal protein L38 (67)
RRFKSSKFGCRDP	0.43	0.2	Phosphorylase (228); Phosphorylase (316); Phosphorylase (297); Phosphorylase (225); Glycogen phosphorylase, brain form (316); Glycogen phosphorylase, muscle form (316); Phosphorylase (338)
EYMHGGKKMGSKE	0.79	0.18	cDNA FLJ57136, highly similar to RNA U small nuclear RNA export adapter protein (148); Phosphorylated adapter RNA export protein (183)
DLALEEKNKGNEC	0.97	0.12	cDNA FLJ76863, highly similar to Homo sapiens stress-induced-phosphoprotein 1 (Hsp70/Hsp90-organizing protein) (STIP1), mRNA (364); STIP1 protein (411); Stress-induced-phosphoprotein 1 (364)
HPPVVGKVTHHSI	0.98	0.16	Putative uncharacterized protein FANK1 (13); cDNA FLJ52987, highly similar to Fibronectin type 3 and ankyrin repeat domains protein 1 (13); Putative uncharacterized protein FANK1 (19); Fibronectin type 3 and ankyrin repeat domains protein 1 (19)
KAQDWEKHFLDAS	0.79	0.09	Calreticulin-3 (230)
FGHTFCKYSEEMK	1.02	0.09	Transcriptional activator protein Pur-alpha (273); PURA protein (252); PURA protein (236); Purine-rich element binding protein A (273)
QGLEAHKYRNTWD	1	0.08	Solute carrier family 25 (Mitochondrial carrier; citrate transporter), member 1, isoform CRA_b (152); Mitochondrial citrate transport protein (262); Tricarboxylate transport protein, mitochondrial (255)
TNLKPHKLLSRSY	0.94	0.15	cDNA FLJ78221, highly similar to Homo sapiens poly (ADP-ribose) polymerase family, member 8 (PARP8), mRNA (405); cDNA, FLJ95269, highly similar to Homo sapiens poly (ADP-ribose) polymerase family, member 8 (PARP8), mRNA (405); cDNA FLJ57558, highly similar to Homo sapiens poly (ADP-ribose) polymerase family, member 8 (PARP8), mRNA (297); Poly [ADP-ribose] polymerase 8 (405); PARP8 protein (158)
RPFAYHKLLKDAG	0.97	0.25	Nuclear pore complex protein Nup214 (143)
SKERLGKIVDRID	1.03	0.2	Reticulocalbin-1 (86)
SYSVKWKKSDVKF	1	0.31	SM-11044 binding protein (SMBP)(EP70-P-iso) (154); Transmembrane 9 superfamily member 3 (198); cDNA FLJ90343 fis, clone NT2RP2002824, highly similar to Transmembrane 9 superfamily protein member 3 (8); TM9SF3 protein (130); SM-11044 binding protein, isoform CRA_b (154)
ADFGLSKIVEHQV	1.57	0.27	cDNA, FLJ93281, highly similar to Homo sapiens calcium/calmodulin-dependent protein kinase IV (CAMK4), mRNA (190); Calcium/calmodulin-dependent protein kinase type IV (190)
LESPQRKHKCHYA	1.67	0.55	Krueppel-like factor 13 (166)
RAQILDKATEYIQ	0.93	0.12	cDNA FLJ54949, highly similar to Homo sapiens MYC associated factor X (MAX), transcript variant 5, mRNA (74); Protein max (66); Max protein (66); MAX protein (57); MAX protein (66); MYC associated factor X (57)
CQRFVEKYTELQK	0.99	0.14	28S ribosomal protein S23, mitochondrial (102)
MQVDPQKYKGIFN	1.04	0.15	cDNA, FLJ96465, highly similar to Homo sapiens solute carrier family 25 (mitochondrial carrier;phosphate carrier), member 3 (SLC25A3), nuclear gene encodingmitochondrial protein, transcript variant 1b, mRNA (98); Phosphate carrier protein, mitochondrial (99); Solute carrier family 25 member 3 isoform b variant (98); cDNA FLJ90278 fis, clone NT2RP1000325, highly similar to Phosphate carrier protei…
MGVNHEKYDNSLK	1.07	0.14	Glyceraldehyde-3-phosphate dehydrogenase (51); Glyceraldehyde-3-phosphate dehydrogenase (139); Glyceraldehyde-3-phosphate dehydrogenase (114)
SREVQSKIEKKYD	1.06	0.11	Transgelin variant (17); cDNA, FLJ94704, highly similar to Homo sapiens transgelin (TAGLN), mRNA (17); TAGLN protein (17); Transgelin (17)
KMTVFPKNKSSTD	1.1	0.31	Serine/threonine-protein kinase PLK4 (327)
STHQCWKALLMKK	1.12	0.18	Putative uncharacterized protein PPA2 (174); cDNA FLJ76209, highly similar to Homo sapiens inorganic pyrophosphatase 2 (PPA2), transcript variant 2, mRNA (216); Putative uncharacterized protein PPA2 (163); Inorganic pyrophosphatase 2, mitochondrial (276)
RFKINKKIPRGPP	0.87	0.16	cDNA FLJ59238, highly similar to SNW domain-containing protein 1 (217); cDNA FLJ51388, highly similar to SNW domain-containing protein 1 (142); cDNA, FLJ78986, highly similar to SNW domain-containing protein 1 (142); SNW1 protein (217); SNW domain-containing protein 1 (217)
YQQKPEKAPKSLI	0.89	0.25	V(k)3 sequence of NG9 gene from fetal liver DNA (46); Ig kappa chain V-I region HK101 (64)
AKHVQSKAIEARH	0.81	0.22	Putative uncharacterized protein SPTAN1 (2057); Putative uncharacterized protein SPTAN1 (301); SPTAN1 protein (282); Putative uncharacterized protein DKFZp564P0562 (1041); Spectrin alpha chain, brain (2052)
KDGKEVKDVKEFK	0.9	0.12	Calpain-7-like protein (337)
GKGKGQKRKRKKS	1.83	0.73	Vascular endothelial growth factor A (152)
QAERQWKKQLGPP	1.64	0.88	cDNA FLJ76897, highly similar to Homo sapiens lectin, mannose-binding, 1 like (LMAN1L), mRNA (338); Protein ERGIC-53-like (338); FLJ00250 protein (144)
SLWEQSKWHRRNS	1.42	0.24	Uncharacterized protein C2orf67 (848)
DLVEHYKKNPMVE	1.14	0.21	Protein tyrosine phosphatase-2 (87); Protein tyrosine phosphatase-2 (196); Tyrosine-protein phosphatase non-receptor type 11 (198)
NQYQALKPRLPLA	1.15	0.1	Claspin (891); Claspin homolog (Xenopus laevis) (891)
PPRQKDKFSPFPV	1.02	0.08	KIAA0324 (218); Serine/arginine repetitive matrix protein 2 (1186)
AEEADRKYEEVAR	1.35	0.14	cDNA, FLJ96568, highly similar to Homo sapiens tropomyosin 3 (TPM3), mRNA (125); cDNA FLJ50612, highly similar to Rattus norvegicus tropomyosin 3, gamma (Tpm3), transcript variant 2, mRNA (59); cDNA FLJ50720, highly similar to Homo sapiens tropomyosin 3 (TPM3), transcript variant 2, mRNA (80); Putative uncharacterized protein DKFZp686J1372 (109); Tropomyosin 3, isoform CRA_b (125); Tropomyosin 3 …
AHHISSKYDELKK	1.27	0.14	cDNA FLJ61096, highly similar to THO complex subunit 2 (754); THOC2 protein (69); THO complex subunit 2 (829)
LREKDPKYSALRQ	1.16	0.18	Transmembrane protein 205 (149)
LADQQDKYMKZZZ	1.05	0.11	RuvB-like 1 (453); Putative uncharacterized protein RUVBL1 (264)
SDEWFAKHNKPKA	1.35	0.25	cDNA FLJ76436 (290); cDNA FLJ16128 fis, clone BRACE2038269, moderately similar to Bombyx mori cytosolic juvenile hormone binding protein 36 kDa subunit (cJHBP) mRNA (234); cDNA FLJ59092 (266); cDNA FLJ55095 (281); Glyoxalase domain-containing protein 4 (305); Uncharacterized protein C17orf25. (496)
IQEKAVKREDLFI	1.25	0.19	Aldo-keto reductase family 1 member B10 (69)
RSITAAKYREKQQ	1.21	0.18	BXDC2 protein (276); Ribosome biogenesis protein BRX1 homolog (276)
SQEIAEKALKKHK	1.1	0.22	cDNA FLJ57964, highly similar to Heterogeneous nuclear ribonucleoprotein H' (122); Heterogeneous nuclear ribonucleoprotein H (167); Heterogeneous nuclear ribonucleoprotein H2 (167)
AKDQQQKAAQHHT	1.04	0.17	cDNA FLJ50221, highly similar to RNA-binding protein 28 (481); RNA-binding protein 28 (622)
SEGLDPKDATDPV	1.46	0.21	RAPGEF6 protein (1477); Rap guanine nucleotide exchange factor 6 (1469)
VKRVTQKEELEKQ	1.37	0.22	Transcription factor MafG (76)
CREEHKKKNPKVP	1.4	0.26	Putative high mobility group protein B3-like protein (29)
DQLSLIKPIKDVD	1.21	0.23	cDNA FLJ45586 fis, clone BRTHA3014000, highly similar to Transcriptional-regulating factor 1 (1130); Breast cancer anti-estrogen resistance 2 (1174); Transcriptional-regulating factor 1 (1154)
GREGEEKPPLSAE	1.36	0.23	cDNA, FLJ95598, highly similar to Homo sapiens dimethylglycine dehydrogenase (DMGDH), nuclear gene encoding mitochondrial protein, mRNA (37); cDNA FLJ33079 fis, clone TRACH2000306, highly similar to Dimethylglycine dehydrogenase, mitochondrial (EC 1.5.99.2) (37); Dimethylglycine dehydrogenase, mitochondrial (37)
NEGVKGKKLTFEY	1.29	0.26	Protein phosphatase 2A activator, regulatory subunit 4 (68); Protein phosphatase 2A activator, regulatory subunit 4 (85); Protein phosphatase 2A activator, regulatory subunit 4 (27); cDNA FLJ60126, highly similar to Homo sapiens protein phosphatase 2A, regulatory subunit B', transcript variant 5, mRNA (62); cDNA FLJ54705, highly similar to Serine/threonine-protein phosphatase 2A regulatory subuni…
DQEKSRKLHELTV	1.73	0.33	cDNA FLJ76989, highly similar to Homo sapiens kinesin family member 5B (KIF5B), mRNA (764); cDNA FLJ51288, highly similar to Kinesin heavy chain (239); Tyrosine-protein kinase receptor (764); Kinesin-1 heavy chain (764)
EQGGKDKLQAHGI	1.41	0.17	Uridine monophosphate synthetase (Orotate phosphoribosyl transferase and orotidine-5'-decarboxylase), isoform CRA_b (162); Uridine monophosphate synthetase isoform E (162); Uridine monophosphate synthetase isoform F (70); Uridine monophosphate synthetase isoform G (162); Uridine monophosphate synthetase isoform I (162); Uridine 5'-monophosphate synthase (162)
EKDQAWKTLKERE	1.72	0.27	cDNA FLJ77724, highly similar to Homo sapiens transcriptional adaptor 3 (NGG1 homolog, yeast)-like (TADA3L), transcript variant 1, mRNA (418); Putative uncharacterized protein TADA3 (101); Transcriptional adapter 3 (418)
ZZZQFKKDIDEHQ	1.67	0.57	Centrosomal protein of 68 kDa (676); Putative uncharacterized protein KIAA0582 (7)
NLRKDQKKTKKRV	1.56	0.33	NOEL1C (132); No Rab11-binding protein 1B (132); No Rab11-binding protein 1A (132); FLJ00355 protein (51); Rab11 family-interacting protein 1 (803)
TEVPGHKNWVVSK	1.77	0.38	NOL8 protein (71); Putative uncharacterized protein NOL8 (139); cDNA FLJ60085, highly similar to Nucleolar protein 8 (139); Nucleolar protein 8 (139); Putative uncharacterized protein DKFZp686P12242 (139); Antigen MLAA41 (107)
GGELGSKIPVHPN	0.98	0.2	cDNA, FLJ92753, Homo sapiens fumarate hydratase (FH), nuclear gene encodingmitochondrial protein, mRNA (172); Fumarate hydratase, mitochondrial (172)
LAESVEKAIEEKK	1.55	0.3	SUPT16H protein (223); FACT complex subunit SPT16 (223)
GDSGSGKPFKIKG	1.08	0.12	Ubiquitin carboxyl-terminal hydrolase (601); Ubiquitin carboxyl-terminal hydrolase 8 (601)
KIREQEKKMWRQE	0.97	0.17	Golgin subfamily A member 6-like protein 1 (431); Putative golgin subfamily A member 6-like protein 6 (436)
DIKMLNKPKDKVS	0.95	0.13	Syntaxin-binding protein 3 (581)
REREGEKEKASWR	0.83	0.13	cDNA FLJ50921, highly similar to Eukaryotic translation initiation factor 3 subunit 10 (1317); Eukaryotic translation initiation factor 3 subunit A (1351); Eukaryotic translation initiation factor 3, subunit A (1351)
GIGGLRKRQDTAS	1.27	0.27	cDNA FLJ37313 fis, clone BRAMY2016938, highly similar to ZINC-FINGER PROTEIN NEURO-D4 (126); cDNA FLJ55156, highly similar to Zinc-finger protein neuro-d4 (182); D4 zinc and double PHD fingers family 1 variant 4 (181); Putative uncharacterized protein DPF1 (126); Zinc finger protein neuro-d4 (181); D4, zinc and double PHD fingers family 1, isoform CRA_d (181); DPF1 protein (181); DPF1 protein (20…
PKDNKRKMGETEA	0.99	0.14	NA
IKNDDGKKALVLD	1.25	0.15	Complement component 1 Q subcomponent-binding protein, mitochondrial (179)
ERQDNPKLDSMRS	1.44	0.17	Serine/threonine-protein phosphatase 4 regulatory subunit 3A (655)
IVEFASKPAARKA	1.62	0.27	SFPQ protein (421); Splicing factor proline/glutamine-rich (Polypyrimidine tract binding protein associated) (421); SFPQ protein (348); Splicing factor, proline- and glutamine-rich (421)
DKCSAPKIWRTPN	1.54	0.26	IQ and ubiquitin-like domain-containing protein (475)
GRVIFTKPVRGVE	1.79	0.38	Putative uncharacterized protein TSSC4 (153); Protein TSSC4 (217)
KQSGFGKDLGEAA	1.25	0.25	cDNA FLJ53469, highly similar to 10-formyltetrahydrofolate dehydrogenase (EC 1.5.1.6) (781); 10-formyltetrahydrofolate dehydrogenase (882); Formyltetrahydrofolate dehydrogenase isoform a variant (882); Aldehyde dehydrogenase 1 family, member L1 variant (934)
TTADNRKVKSTIT	1.3	0.23	Fatty acid-binding protein 9 (80)
GQEVLIKVKHFMK	1.58	0.24	Acyl-CoA dehydrogenase family member 11 (385); Putative uncharacterized protein ACAD11 (385)
FLTDTAKQIKTKV	1.61	0.25	Tryptophanyl-tRNA synthetase, cytoplasmic (366)
QKWGQRKNKPTMN	1.38	0.24	GA binding protein transcription factor, alpha subunit 60kDa, isoform CRA_a (364); cDNA, FLJ94105, highly similar to Homo sapiens GA binding protein transcription factor, alpha subunit 60kDa (GABPA), mRNA (364); GA-binding protein alpha chain (364); GA binding protein transcription factor, alpha subunit (60kD) variant (364); GA binding protein transcription factor, alpha subunit 60kDa (364)
KGGKNSKYAPAEG	1.33	0.24	Ubiquitin-like, containing PHD and RING finger domains, 1, isoform CRA_a (546); cDNA FLJ78091, highly similar to Homo sapiens ubiquitin-like, containing PHD and RING finger domains, 1 (UHRF1), mRNA (546); cDNA, FLJ95411, highly similar to Homo sapiens ubiquitin-like, containing PHD and RING finger domains, 1 (UHRF1), mRNA (546); cDNA FLJ60383, highly similar to Ubiquitin-like PHD and RING fingerd…
LAAAKSKLLKTWR	1.14	0.21	Dynein heavy chain 5, axonemal (322)
AMRASQKDFENSM	1	0.22	cDNA FLJ56683, highly similar to Peroxisomal 3,2-trans-enoyl-CoA isomerase (EC 5.3.3.8) (11); Putative uncharacterized protein PECI (39); Putative uncharacterized protein PECI (11); Putative uncharacterized protein PECI (88); Peroxisomal 3,2-trans-enoyl-CoA isomerase (41); Peroxisomal D3,D2-enoyl-CoA isomerase isoform 1 variant (11); Peroxisomal D3,D2-enoyl-CoA isomerase isoform 1 variant (48); H…
EVKLAIKPFYQNK	1	0.15	cDNA, FLJ94773, highly similar to Homo sapiens splicing factor, arginine/serine-rich 2, interacting protein (SFRS2IP), mRNA (1077); SFRS2-interacting protein (1392)
MKTPFGKTPGQRS	1.2	0.24	cDNA, FLJ79503, highly similar to Spindlin-1 (7); cDNA FLJ34698 fis, clone MESAN2002147, highly similar to Spindlin-1 (7); Spindlin-1 (7)
QKIRHYKIEDRGN	1.15	0.32	UPF0568 protein C14orf166 (41); cDNA, FLJ92278 (41)
ILNNHGKSKTCCE	1.13	0.24	Chromosome 6 open reading frame 150 (392); Uncharacterized protein C6orf150 (392)
SMEELGKAKPTTR	1.24	0.25	Fibroblast growth factor-binding protein 2 (174)
GGLVAGKEEKKKA	1.08	0.19	cDNA FLJ44403 fis, clone TUTER2000904, moderately similar to Unc-119 protein homolog (Retinal protein 4) (24); Protein unc-119 homolog B (24)
RFGKKGKLPHQVD	0.94	0.26	Putative uncharacterized protein DNAH7 (95); Putative uncharacterized protein DNAH7 (70); Dynein heavy chain 7, axonemal (95)
ESQSGGKYKTRLK	1.64	0.52	Protein strawberry notch homolog 1 (413)
KKMQMLKLDKENA	2.27	0.52	Beta tropomyosin isoform (12); cDNA FLJ56690, highly similar to Tropomyosin beta chain (12); cDNA FLJ57891, highly similar to Tropomyosin beta chain (12); cDNA FLJ57036, highly similar to Homo sapiens tropomyosin 2 (beta) (TPM2), transcript variant 2, mRNA (12); Tropomyosin 1 (Alpha), isoform CRA_o (12); Tropomyosin 2 (Beta) (12); Tropomyosin 3 (12); Tropomyosin 1 (Alpha), isoform CRA_f (12); cDN…
LEKSAKKDSKKKS	1.23	0.27	cDNA FLJ45792 fis, clone NT2RI2004818, highly similar to 1-phosphatidylinositol-4,5-bisphosphatephosphodiesterase beta 1 (EC 3.1.4.11) (871); cDNA FLJ57337, highly similar to 1-phosphatidylinositol-4,5-bisphosphate phosphodiesterase beta 1 (EC 3.1.4.11) (871); 1-phosphatidylinositol-4,5-bisphosphate phosphodiesterase beta-1 (972)
VDETQFKKILGYI	1.58	0.19	Aldehyde dehydrogenase, mitochondrial (368); cDNA FLJ50888, highly similar to Aldehyde dehydrogenase, mitochondrial (EC 1.2.1.3) (321); ALDH2 (221); Mitochondrial aldehyde dehydrogenase 2 variant (368)
APSTFSKLKMEIK	0.93	0.11	cDNA FLJ44906 fis, clone BRAMY3007078, highly similar to JmjC domain-containing histone demethylation protein 3B (360); JMJD2B protein (636); Lysine-specific demethylase 4B (602)
SKKAVTKAQKKDG	0.84	0.18	Histone H2B (21); Histone H2B type 1-C/E/F/G/I (21); Histone H2B type 1-D (21); Histone H2B type 1-H (21); Histone H2B type 1-J (21); Histone H2B type 1-K (21); Histone H2B type 1-L (21); Histone H2B type 1-N (21); Histone H2B type 1-O (21); Putative histone H2B type 2-C (21); Putative histone H2B type 2-D (21); Histone H2B type 2-E (21); Histone H2B type 3-B (21); Histone H2B type F-S (21); HIST…
QATENAKEEVRRI	1.15	0.19	cDNA FLJ59973, highly similar to Elongation factor 1-gamma (132); cDNA FLJ56389, highly similar to Elongation factor 1-gamma (182); cDNA FLJ59991, highly similar to Elongation factor 1-gamma (132); cDNA FLJ59433, highly similar to Elongation factor 1-gamma (12); Elongation factor 1-gamma (132); Eukaryotic translation elongation factor 1 gamma, isoform CRA_c (132)
TLQAWSKTTPRRI	0.78	0.15	cDNA, FLJ93645, highly similar to Homo sapiens chromatin assembly factor 1, subunit B (p60) (CHAF1B),mRNA (494); Chromatin assembly factor 1 subunit B (494)
GRQTVDKVMGIPK	0.88	0.31	Mediator of DNA damage checkpoint protein 1 (812)
DLGHCEKIKKACG	1.01	0.19	Multifunctional protein ADE2 (283); Putative uncharacterized protein DKFZp781N1372 (290)
NNPALEKLLPHIR	1.04	0.19	cDNA FLJ75549, highly similar to Homo sapiens ribosomal protein, large, P0 (RPLP0), transcript variant 1, mRNA (77); RPLP0 protein (77); Ribosomal protein P0 variant (77); 60S acidic ribosomal protein P0 (77)
AAKAVGKVIPELN	0.92	0.15	Glyceraldehyde-3-phosphate dehydrogenase (131); Glyceraldehyde-3-phosphate dehydrogenase (219); Glyceraldehyde-3-phosphate dehydrogenase (194); Glyceraldehyde-3-phosphate dehydrogenase (26)
CFRAGMKKEAVQN	0.9	0.19	Hepatocyte nuclear factor 4, alpha (117); Hepatocyte nuclear factor 4, gamma (78); Putative uncharacterized protein HNF4A (91); Hepatocyte nuclear factor 4-alpha (126); Hepatocyte nuclear factor 4-gamma (78); Hepatocyte nuclear factor 4, alpha, isoform CRA_c (119)
RDPSKIKWGDAGA	0.57	0.2	Glyceraldehyde-3-phosphate dehydrogenase (86); Glyceraldehyde-3-phosphate dehydrogenase (61)
AVTKAQKKDGKKR	0.98	0.16	Histone H2B (24); Histone H2B type 1-C/E/F/G/I (24); Histone H2B type 1-D (24); Histone H2B type 1-H (24); Histone H2B type 1-J (24); Histone H2B type 1-K (24); Histone H2B type 1-L (24); Histone H2B type 1-N (24); Histone H2B type 1-O (24); Putative histone H2B type 2-C (24); Putative histone H2B type 2-D (24); Histone H2B type 2-E (24); Histone H2B type 3-B (24); HIST1H2BC protein (24)
NPNEGEKFKQISQ	0.85	0.13	DnaJ homolog subfamily A member 1 (44); DnaJ (Hsp40) homolog, subfamily A, member 1, isoform CRA_c (44); DnaJ (Hsp40) homolog, subfamily A, member 1, isoform CRA_b (44)
PDPGESKGEPRSE	0.81	0.18	cDNA FLJ57039, highly similar to CREB-binding protein (EC 2.3.1.48) (627); CREB-binding protein (1014); CREBBP variant protein (1044)
EETEELKRFDDPG	0.77	0.15	X-ray repair complementing defective repair in Chinese hamster cells 6 (Ku autoantigen, 70kDa) (338); X-ray repair complementing defective repair in Chinese hamster cells 6 (Ku autoantigen, 70kDa), isoform CRA_b (297); X-ray repair complementing defective repair in Chinese hamster cells 6 (Ku autoantigen, 70kDa) (288); cDNA, FLJ96699, highly similar to Homo sapiens thyroid autoantigen 70kDa (Ku a…
NPEAADKFKEINN	0.82	0.16	DnaJ homolog subfamily C member 5 (56)
AQIFIQKKAVKNF	0.73	0.15	Catalase (416); Catalase (476); Similar to catalase (177)
PMEFVNKMKKEGK	0.83	0.14	ATP-citrate synthase (962); cDNA FLJ56442, highly similar to ATP-citrate synthase (EC 2.3.3.8) (1006); cDNA FLJ55447, highly similar to ATP-citrate synthase (EC 2.3.3.8) (691); ACLY variant protein (998); cDNA FLJ37765 fis, clone BRHIP2024742, highly similar to ATP-CITRATE (562)
KAEGDAKGDKAKV	0.58	0.14	Putative uncharacterized protein ENSP00000406535 (11); Non-histone chromosomal protein HMG-17 (11)
QATTENKELKTVT	0.95	0.16	Delta(3,5)-Delta(2,4)-dienoyl-CoA isomerase, mitochondrial (318)
ALTPEQKKELSDI	0.89	0.21	Fructose-bisphosphate aldolase A (13)
EQRWGAKTIEGSG	1.12	0.29	cDNA FLJ54279, highly similar to Hematopoietic lineage cell-specific protein (41); cDNA FLJ59379, highly similar to Hematopoietic lineage cell-specific protein (41); cDNA FLJ59981, highly similar to Hematopoietic lineage cell-specific protein (41); Putative uncharacterized protein HCLS1 (41); Hematopoietic lineage cell-specific protein (41); HCLS1 protein (41)
GANSLGKVMPTKS	0.85	0.14	cDNA FLJ75040, highly similar to Homo sapiens serum response factor-related protein, RSRFC9 (247); cDNA FLJ50129, highly similar to Myocyte-specific enhancer factor 2A (179); Myocyte-specific enhancer factor 2A (249); MADS box transcription enhancer factor 2, polypeptide A (Myocyte enhancer factor 2A) variant (249); MEF2A protein (168)
KPSATGKVIDKKL	1.22	0.15	cDNA FLJ75563, highly similar to Homo sapiens cyclin B1 (CCNB1), mRNA (73); G2/mitotic-specific cyclin-B1 (73); Cyclin B1 (73)
PVAAMRKEADMLR	1.02	0.15	Histone-lysine N-methyltransferase MLL2 (5001); Myeloid/lymphoid or mixed-lineage leukemia 2 variant (2443); MLL2 protein (134)
CCYNCGKPGHLAR	1.38	0.23	cDNA FLJ77718 (105); cDNA FLJ61146, highly similar to Cellular nucleic acid-binding protein (86); Cellular nucleic acid-binding protein (103); Cellular nucleic acid binding protein beta variant 2 (98); Cellular nucleic acid binding protein beta variant 1 (97); Zinc finger protein 9 (A cellular retroviral nucleic acid binding protein) (104)
EEKEDVKSCAEWV	1.16	0.17	ATP synthase subunit d, mitochondrial (99)
GLDHFNKAPKRSR	0.28	0.13	Ubiquitin carboxyl-terminal hydrolase (1068); Ubiquitin carboxyl-terminal hydrolase (985); Ubiquitin carboxyl-terminal hydrolase (1094); Ubiquitin carboxyl-terminal hydrolase 7 (1084)
AASMVLKDVGLKK	0.31	0.08	Acetyl-CoA acetyltransferase, mitochondrial (338)
QTKGYNKVSPFFV	0.32	0.11	Putative uncharacterized protein OXSM (174); 3-oxoacyl-[acyl-carrier-protein] synthase, mitochondrial (174)
AVRLLLKYGDAWV	0.42	0.11	Acetyl-coenzyme A synthetase 2-like, mitochondrial (396); cDNA FLJ45659 fis, clone CTONG2020582, highly similar to Acetyl-coenzyme A synthetase 2-like, mitochondrial (EC 6.2.1.1) (396); cDNA FLJ58578, highly similar to Acetyl-coenzyme A synthetase 2-like, mitochondrial (EC 6.2.1.1) (275); ACSS1 protein (353); cDNA FLJ43068 fis, clone BRTHA3008778, moderately similar to Acetyl-coenzyme A synthetas…
ETAKTGKFLKSPP	0.48	0.17	NA
EAAEYAKLLAKRM	0.89	0.16	Ribosomal protein S6, isoform CRA_a (180); cDNA, FLJ92127, Homo sapiens ribosomal protein S6 (RPS6), mRNA (211); Ribosomal protein S6 (211); 40S ribosomal protein S6 (211)
PKGVFTKELPSGK	0.92	0.17	Peroxiredoxin-6 (209)
LKTSLGKVGVKEE	0.72	0.13	Antigen KI-67 (1639)
ERKLVTKLQNSER	1.06	0.16	cDNA, FLJ92417, highly similar to Homo sapiens p8 protein (candidate of metastasis 1) (P8), mRNA (69); Nuclear protein 1 (69)
GSQGDSKNAKKKN	0.77	0.14	CREBBP (7); CREB-binding protein (1583); CREBBP variant protein (1613)
MVECFNKISRDAD	0.92	0.24	cDNA FLJ57619, highly similar to Delta 3,5-delta 2,4-dienoyl-CoA isomerase, mitochondrial (EC 5.3.3.-) (95); Delta(3,5)-Delta(2,4)-dienoyl-CoA isomerase, mitochondrial (95)
KKKIKEKYIDQEE	1.03	0.24	Heat shock protein HSP 90-alpha (283); Hsp89-alpha-delta-N (90); HSP90AA1 protein (283); Full-length cDNA clone CS0CAP007YF18 of Thymus of Homo sapiens (human) (104); HSP90AA1 protein (189)
YNKILNKYGDMRR	1	0.22	cDNA FLJ46228 fis, clone TESTI4014908, highly similar to Dedicator of cytokinesis protein 2 (119); Dedicator of cytokinesis protein 2 (1058)
NVESYTKLGNPTR	1.4	0.43	cDNA FLJ51740, highly similar to Dolichyl-diphosphooligosaccharide--proteinglycosyltransferase 67 kDa subunit (EC 2.4.1.119) (161); cDNA FLJ50809, highly similar to Dolichyl-diphosphooligosaccharide--protein glycosyltransferase 67 kDa subunit (EC 2.4.1.119) (15); Ribophorin I variant (187); RPN1 protein (187); Similar to ribophorin I (148); Dolichyl-diphosphooligosaccharide--protein glycosyltrans…
LGDCLVKIYKSDG	0.95	0.27	ADP/ATP translocase 2 (163); cDNA, FLJ96310, highly similar to Homo sapiens solute carrier family 25 (mitochondrial carrier; adenine nucleotide translocator), member 5 (SLC25A5), mRNA (163); SLC25A5 protein (188)
LTILSKKKNGNYC	0.9	0.17	5-aminoimidazole-4-carboxamide ribonucleotide formyltransferase/IMP cyclohydrolase, isoform CRA_g (356); cDNA, FLJ93545, highly similar to Homo sapiens 5-aminoimidazole-4-carboxamide ribonucleotide formyltransferase/IMP cyclohydrolase (ATIC), mRNA (357); cDNA FLJ57133, highly similar to Bifunctional purine biosynthesis protein PURH (298); Putative uncharacterized protein ATIC (26); Putative uncha…
VPQHAGKKGKLSE	1.15	0.26	Bromodomain-containing protein 3 (304)
TQSALPKIIKAGF	0.7	0.12	Obg-like ATPase 1 (294); Putative uncharacterized protein PTD004 (111)
SHIQSDKEIDAFV	0.7	0.15	cDNA FLJ61138, highly similar to Choline dehydrogenase, mitochondrial (EC 1.1.99.1) (191); Choline dehydrogenase, mitochondrial (496)
VNAKDSKWLTPLH	0.69	0.15	Serine/threonine-protein phosphatase 6 regulatory ankyrin repeat subunit A (106); ANKRD28 protein (103); ANKRD28 protein (106)
SKHDMNKVLDLEL	0.63	0.17	Annexin A1 (250); cDNA FLJ51887, highly similar to Annexin A1 (125); Annexin I (250); Annexin A1, isoform CRA_a (250)
QVNEPWKRIKGSE	0.85	0.2	cDNA FLJ76789, highly similar to Homo sapiens methionine-tRNA synthetase (MARS), mRNA (726); cDNA FLJ53309, highly similar to Methionyl-tRNA synthetase (EC 6.1.1.10) (492); Methionyl-tRNA synthetase, cytoplasmic (726)
TPEQVGKMKAIVE	0.8	0.15	X-ray repair complementing defective repair in Chinese hamster cells 6 (Ku autoantigen, 70kDa) (461); X-ray repair complementing defective repair in Chinese hamster cells 6 (Ku autoantigen, 70kDa), isoform CRA_b (420); X-ray repair complementing defective repair in Chinese hamster cells 6 (Ku autoantigen, 70kDa) (411); cDNA, FLJ96699, highly similar to Homo sapiens thyroid autoantigen 70kDa (Ku a…
GALTAEKLRSVVT	0.75	0.18	Acyl-protein thioesterase 2 (190); Lysophospholipase II (123)
LSTPNEKLLGHLV	0.88	0.2	Putative uncharacterized protein DARS (88); Putative uncharacterized protein DARS (186); Putative uncharacterized protein DKFZp781B11202 (274); Aspartyl-tRNA synthetase, cytoplasmic (374)
RYVQELKQERKSN	1.03	0.22	Putative uncharacterized protein FNBP1 (108); Putative uncharacterized protein FNBP1 (110); FNBP1 protein (110); Formin-binding protein 1 (110); Formin binding protein 1 (71)
TSNTVSKLLEKVR	0.78	0.31	cDNA FLJ35087 fis, clone PLACE6005546, highly similar to Polymerase I and transcript release factor (64); Polymerase I and transcript release factor (109)
GSKAKGKEIQPVS	0.57	0.11	Putative uncharacterized protein ENSP00000406378 (55)
KMKNYNKPWEPKW	0.84	0.15	ATP synthase protein 8 (49)
TKSHAHKMVKWGL	0.86	0.13	CREBBP (17); CREBBP (9); CREBBP (10); CREB-binding protein (1741); CBP (222); CREBBP variant protein (1771)
KFHGTVKAENGKL	0.87	0.17	Glyceraldehyde-3-phosphate dehydrogenase (61); Glyceraldehyde-3-phosphate dehydrogenase (36)
GFPTWLKLDKKVS	0.75	0.13	cDNA, FLJ92973, highly similar to Homo sapiens villin 2 (ezrin) (VIL2), mRNA (60); Ezrin (60)
HRAEISKIMRECQ	0.89	0.15	OCIA domain-containing protein 2 (41)
EQSTIVKERGTVY	1.03	0.19	cDNA, FLJ94557, highly similar to Homo sapiens FK506 binding protein 4, 59kDa (FKBP4), mRNA (274); Peptidyl-prolyl cis-trans isomerase FKBP4 (274)
IYVTPEKIAKSKM	0.98	0.19	Putative uncharacterized protein RECQL (192); ATP-dependent DNA helicase Q1 (193)
EGQNLAKILKDLE	0.77	0.16	Diacylglycerol kinase alpha (484)
LHGEKGKLGQYIR	0.93	0.19	cDNA, FLJ92860, highly similar to Homo sapiens solute carrier family 9 (sodium/hydrogen exchanger), member 3 regulator 1 (SLC9A3R1), mRNA (34); Na(+)/H(+) exchange regulatory cofactor NHE-RF1 (34)
LASKQEKDGTEKR	0.84	0.15	cDNA FLJ54188, moderately similar to High mobility group protein HMG-I/HMG-Y (18); Putative uncharacterized protein HMGA1 (18); High mobility group protein HMG-I/HMG-Y (18); High mobility group AT-hook 1 (18); HMGA1 protein (18)
LRASEGKTVEVPF	0.75	0.14	GMP reductase (352)
KEKLGGKLSSEDK	0.85	0.26	78 kDa glucose-regulated protein (585); HSPA5 protein (586)
KPGDDWKKTLKLP	0.71	0.2	cDNA, FLJ93750, Homo sapiens DEAD (Asp-Glu-Ala-Asp) box polypeptide 6 (DDX6), mRNA (62); Probable ATP-dependent RNA helicase DDX6 (73); DDX6 protein (73)
NKLTLDKLDVKGK	0.76	0.14	Phosphoglycerate kinase (11); Phosphoglycerate kinase 1 (11)
EEVLTNKKTTFFG	0.68	0.13	cDNA, FLJ94267, highly similar to Homo sapiens glutathione S-transferase omega 1 (GSTO1), mRNA (160); Glutathione S-transferase omega-1 (160); Glutathione S-transferase omega 1 (132)
LARSIAKEGFEKI	0.81	0.19	Mitochondrial heat shock 60kD protein 1 variant 1 (125); cDNA FLJ54912, highly similar to 60 kDa heat shock protein, mitochondrial (102); cDNA FLJ54373, highly similar to 60 kDa heat shock protein, mitochondrial (125); cDNA FLJ52281, highly similar to 60 kDa heat shock protein, mitochondrial (125); 60 kDa chaperonin (10); Putative uncharacterized protein HSPD1 (167); 60 kDa heat shock protein, mi…
LITGPSKLSRGMP	0.85	0.16	cDNA FLJ50924, highly similar to Nuclear receptor corepressor 1 (223); Nuclear receptor corepressor 1 (1412); Nuclear receptor co-repressor (1319); Putative uncharacterized protein DKFZp434M075 (19)
DKMMEQKSTAVKA	0.86	0.16	Dihydrolipoyl dehydrogenase (77); cDNA FLJ50515, highly similar to Dihydrolipoyl dehydrogenase, mitochondrial (EC 1.8.1.4) (28); cDNA FLJ56112, highly similar to Dihydrolipoyl dehydrogenase, mitochondrial (EC 1.8.1.4) (104); Dihydrolipoyl dehydrogenase (127); Dihydrolipoyl dehydrogenase, mitochondrial (127)
PGTMSEKSVEAAA	0.91	0.22	NA
PGSPLDKLVSSTS	0.81	0.15	cDNA FLJ51350, highly similar to Hydroxymethylglutaryl-CoA synthase, mitochondrial (EC 2.3.3.10) (213); cDNA FLJ60950, highly similar to Hydroxymethylglutaryl-CoA synthase, mitochondrial (EC 2.3.3.10) (203); cDNA FLJ56838, highly similar to Hydroxymethylglutaryl-CoA synthase, mitochondrial (EC 2.3.3.10) (395); Hydroxymethylglutaryl-CoA synthase, mitochondrial (437); HMGCS2 protein (437)
QLAAAEKFKVQGE	0.79	0.14	cDNA, FLJ92170, Homo sapiens nascent-polypeptide-associated complex alpha polypeptide (NACA), mRNA (142); Nascent polypeptide-associated complex subunit alpha (142); Putative nascent polypeptide-associated complex subunit alpha-like protein (141)
YPPWPGKIVNPPK	0.85	0.14	Putative oxidoreductase GLYR1 (25)
NIVKFHKYWADIK	0.64	0.1	cDNA FLJ54186, highly similar to Nuclear receptor-binding protein (114); Putative uncharacterized protein NRBP1 (134); Nuclear receptor-binding protein (134)
RHAYVHKPYLYSK	0.64	0.12	Biorientation of chromosomes in cell division protein 1-like (473)
LDNFLDKLZZZZZ	0.77	0.11	cDNA FLJ56548, highly similar to Elongation factor 2 (565); Elongation factor 2 (857); Similar to Elongation factor 2b (516)
LQNKNKKNWDKAR	0.66	0.11	AGGF1 protein (391); Angiogenic factor with G patch and FHA domains 1, isoform CRA_a (365); Angiogenic factor with G patch and FHA domains 1 (680)
SGTENLKDKKIFN	0.48	0.1	Zinc finger FYVE domain-containing protein 16 (228)
EGPAKGKDAEAAE	0.63	0.13	Putative uncharacterized protein NCOR2 (878); Putative uncharacterized protein NCOR2 (861); Putative uncharacterized protein NCOR2 (315); Putative uncharacterized protein NCOR2 (860); Nuclear receptor corepressor 2 (878)
KRKAEEKLESYRK	0.54	0.19	Putative uncharacterized protein CCDC75 (19); Putative uncharacterized protein CCDC75 (123); Coiled-coil domain-containing protein 75 (127)
PAGGDEKDIKAFM	0.68	0.13	Antigen KI-67 (1185)
AEIEDVKPAKTVN	0.95	0.21	cDNA FLJ75930, highly similar to Homo sapiens NADH dehydrogenase (ubiquinone) 1 alpha subcomplex, 9, 39kDa (NDUFA9), mRNA (370); NADH dehydrogenase [ubiquinone] 1 alpha subcomplex subunit 9, mitochondrial (370); Similar to NADH dehydrogenase (Ubiquinone) 1 alpha subcomplex, 9 (39kD) (331)
SGKEKSKFDEMAK	0.69	0.14	High mobility group protein B3 (59); Non-histone chromosomal protein (59); Putative uncharacterized protein DKFZp779G118 (89)
ALSSEGKPYVTKE	0.69	0.1	Putative uncharacterized protein SPTAN1 (2426); cDNA FLJ59116, highly similar to Spectrin alpha chain, brain (1261); Spectrin alpha chain, brain (2421)
GSGAGGKPLEGLS	0.78	0.2	Nucleoporin 50kDa (83); Nuclear pore complex protein Nup50 (83); HCG1989366, isoform CRA_c (55)
KTFGKMKPRYEIN	0.66	0.1	cDNA FLJ50780, highly similar to Versican core protein (311); Versican core protein (3312); Chondroitin sulfate proteoglycan 2 (Versican) variant (3326); Putative uncharacterized protein DKFZp686K06110 (1976)
LNKKDDKGRDKGK	0.66	0.12	SWI/SNF related, matrix associated, actin dependent regulator of chromatin, subfamily a, member 2 (235); SWI/SNF related, matrix associated, actin dependent regulator of chromatin, subfamily a, member 2 (233); cDNA FLJ59976, highly similar to Probable global transcription activator SNF2L2 (EC 3.6.1.-) (193); SWI/SNF related, matrix associated, actin dependent regulator of chromatin, subfamily a, …
FRNERGKGKIRHH	0.41	0.1	cDNA FLJ59291, highly similar to Slp homolog lacking C2 domains b (785); Exophilin-5 (973); Exophilin 5 (973); Putative uncharacterized protein DKFZp781H0795 (897)
VWIGHKKGATKMK	0.58	0.11	cDNA, FLJ94537, highly similar to Homo sapiens MCF.2 cell line derived transforming sequence (MCF2), mRNA (708); cDNA FLJ50789, highly similar to Proto-oncogene DBL (669); cDNA FLJ59710, highly similar to Proto-oncogene DBL (853); cDNA FLJ51685, highly similar to Proto-oncogene DBL (784); cDNA, FLJ79315, highly similar to Proto-oncogene DBL (784); Proto-oncogene DBL (708); MCF.2 cell line derived…
KKKKNAKPLSFKV	1.03	0.17	Peptidyl-prolyl cis-trans isomerase FKBP3 (160); FK506-binding protein 3 variant (160)
RVPDAKKPKPKKV	1.08	0.25	cDNA FLJ16830 fis, clone UTERU3022536, highly similar to Chromodomain helicase-DNA-binding protein 4 (EC 3.6.1.-) (259); Chromodomain-helicase-DNA-binding protein 4 (285); CHD4 protein (285)
DDKHLLKPWDAKK	1.04	0.2	cDNA FLJ39063 fis, clone NT2RP7014348, highly similar to Homo sapiens transducer of regulated cAMP response element-binding protein (CREB) 2 (TORC2), mRNA (120); CREB-regulated transcription coactivator 2 (228)
PKELVRKPYVLND	0.99	0.22	cDNA FLJ51327, highly similar to Protein CGI-117 (90); Nucleolar protein 16 (90); Putative uncharacterized protein HSPC111 (90); HSPC185 (65)
AARARSKGKNSDE	1.11	0.21	Inhibitor of growth family member 4 variant deltaEx2 (122); Inhibitor of growth family member 4 variant deltaEx6A (146); cDNA FLJ53613, highly similar to Inhibitor of growth protein 4 (146); cDNA FLJ52468, highly similar to Inhibitor of growth protein 4 (94); Putative uncharacterized protein ING4 (139); Inhibitor of growth protein 4 (146); ING4 exon 4-5 boundary 12 bp skip variant (142); ING4 exo…
EYNRIQKELEREK	0.64	0.13	Centrosome-associated protein CEP250 (1048)
VLKVVAKVIRALL	0.84	0.15	cDNA FLJ77325 (407); Endonuclease domain-containing 1 protein (407)
DGLQNEKNIVSTP	0.64	0.17	3-hydroxymethyl-3-methylglutaryl-Coenzyme A lyase (Hydroxymethylglutaricaciduria), isoform CRA_b (23); cDNA FLJ53101, highly similar to Hydroxymethylglutaryl-CoA lyase, mitochondrial (EC 4.1.3.4) (48); Hydroxymethylglutaryl-CoA lyase, mitochondrial (48); cDNA, FLJ94502, highly similar to Homo sapiens 3-hydroxymethyl-3-methylglutaryl-Coenzyme A lyase(hydroxymethylglutaricaciduria) (HMGCL), mRNA (4…
LTAAITKILAEGG	0.78	0.38	Elongation factor Tu, mitochondrial (79)
HGDMDQKERDVIR	0.73	0.13	NA
DLQCYVKPTKNMS	0.82	0.17	cDNA FLJ75393, highly similar to Homo sapiens PHD finger protein 16 (PHF16), mRNA (735); Protein Jade-3 (735)
PAPPPYKAPRLDE	1.09	0.19	Putative uncharacterized protein ENSP00000380130 (2252); Histone-lysine N-methyltransferase MLL4 (2296)
TIIPLMKKDHRDN	0.99	0.2	Fatty acid synthase (786)
VSSFEEKMISDAI	1.08	0.16	Malate dehydrogenase (207); cDNA FLJ52880, highly similar to Malate dehydrogenase, mitochondrial (EC 1.1.1.37) (272); Malate dehydrogenase, mitochondrial (314); Malate dehydrogenase (293); Malate dehydrogenase (314); Malate dehydrogenase (292)
YKEESKKALPPEK	1	0.18	cDNA FLJ44920 fis, clone BRAMY3011501, highly similar to Heterogeneous nuclear ribonucleoprotein U (600); cDNA FLJ54020, highly similar to Heterogeneous nuclear ribonucleoprotein U (634); Heterogeneous nuclear ribonucleoprotein U (675); Heterogeneous nuclear ribonucleoprotein U (Scaffold attachment factor A) (573); Heterogeneous nuclear ribonucleoprotein U (Scaffold attachment factor A) (399); He…
ALGGATKDMGKML	1.02	0.16	cDNA FLJ52864, moderately similar to Complexin-2 (14); Complexin-1 (14); Complexin-2 (14)
KVATHEKEWKCTN	1.02	0.2	Putative uncharacterized protein HCFC1 (288); Host cell factor 1 (288); HCFC1 protein (288)
EPGAEEKFKEIAE	0.98	0.18	cDNA FLJ52967, highly similar to DnaJ homolog subfamily B member 1 (44); DnaJ homolog subfamily B member 1 (44); cDNA, FLJ93008, Homo sapiens DnaJ (Hsp40) homolog, subfamily B, member 1 (DNAJB1),mRNA (44); DNAJB1 protein (44)
LGEKGEKMSKSLG	0.99	0.23	cDNA FLJ75180, highly similar to Homo sapiens mitochondrial isoleucine tRNA synthetase, mRNA (592); Isoleucyl-tRNA synthetase, mitochondrial (664)
SNLDLRKELSEPS	0.79	0.21	cDNA FLJ75245, highly similar to Homo sapiens carbamoyl-phosphate synthetase 1, mitochondrial (CPS1), mRNA (841); Carbamoyl-phosphate synthase [ammonia], mitochondrial (841); Putative uncharacterized protein CPS1 (841); Carbamoyl-phosphate synthetase 1 variant (851); Carbamoylphosphate synthetase I (841)
SQAIAEKQPSQEV	0.67	0.17	Histone acetyltransferase p300 (970); EP300 protein (970)
FKDTHPKFPAGGK	0.88	0.14	Cytochrome b5 reductase 3 (97); cDNA FLJ56301, highly similar to NADH-cytochrome b5 reductase (EC 1.6.2.2) (153); NADH-cytochrome b5 reductase 3 (120); cDNA FLJ42537 fis, clone BRACE3004058, highly similar to NADH-cytochrome B5 reductase (EC 1.6.2.2) (76)
KTNVPVKLFARST	0.78	0.12	cDNA FLJ77421, highly similar to Homo sapiens autoantigen p542 mRNA (149); RNA binding protein, autoantigenic (HnRNP-associated with lethal yellow homolog (Mouse)), isoform CRA_a (165); RNA binding protein, autoantigenic (HnRNP-associated with lethal yellow homolog (Mouse)) (149); RNA binding protein, autoantigenic (HnRNP-associated with lethal yellow homolog (Mouse)) (99); RNA binding protein, a…
KDIKKEKDKGKAE	1.01	0.18	SEC62 protein (110); SEC62 protein (72); Translocation protein SEC62 (110)
PETPKQKGESRPE	0.73	0.17	NIPBL protein (706); cDNA FLJ75519 (706); Nipped-B-like protein (706); Transcriptional regulator (706)
LSELEEKLKKCNM	0.85	0.14	Putative uncharacterized protein LCMT1 (185); Putative uncharacterized protein LCMT1 (198); Leucine carboxyl methyltransferase 1 (181)
PKFGIEKEVRVCE	0.82	0.24	cDNA FLJ57484, highly similar to Hepatocyte growth factor-regulated tyrosine kinase substrate (207); cDNA FLJ61530, highly similar to Hepatocyte growth factor-regulated tyrosine kinase substrate (207); Hepatocyte growth factor-regulated tyrosine kinase substrate (207)
KVTGGIKTVDMRD	0.42	0.1	SplA/ryanodine receptor domain and SOCS box containing 1 (10); SPRY domain-containing SOCS box protein 1 (10)
AQEVHEKLRGWLK	0.73	0.13	Triosephosphate isomerase (152); Triosephosphate isomerase (106); Triosephosphate isomerase (188)
KGWESRKRKLSGD	0.79	0.13	TCOF1 protein (1308); cDNA FLJ57828, highly similar to Treacle protein (818); cDNA FLJ57346, highly similar to Homo sapiens Treacher Collins-Franceschetti syndrome 1 (TCOF1), transcript variant 1, mRNA (1309); Putative uncharacterized protein DKFZp434G1035 (18); Treacle protein (1346)
EIKKEEKKEPKKE	0.58	0.2	Microtubule-associated protein 1B, isoform CRA_a (567); MAP1B protein (693); Microtubule-associated protein 1B (693)
PHCRTMKNVLNHM	0.82	0.25	CREB-binding protein (389); Histone acetyltransferase p300 (373); CREBBP variant protein (457); CBP (123); EP300 protein (373)
IVAKNNKNMAFKL	0.71	0.11	GTP-binding protein GEM (279)
YDSSSSKGKKSRT	0.73	0.18	Inhibitor of growth family, member 4, isoform CRA_g (127)
KSNVSYKNPSLMP	0.72	0.25	FACT complex subunit SPT16 (513)
ZMSGRGKGGKGLG	0.82	0.17	Histone H4 (7)
KGKGKGKGKGKPK	1.12	0.32	Cytosine-specific methyltransferase (39); DNA (cytosine-5)-methyltransferase 1 (1115); Cytosine-specific methyltransferase (1102)
PEEAKYKLCKVRK	1.1	0.22	cDNA, FLJ92004, Homo sapiens ribosomal protein S4, X-linked (RPS4X), mRNA (122); Ribosomal protein S4, X-linked X isoform variant (122); RPS4X protein (102); 40S ribosomal protein S4, X isoform (122)
SLDSEAKEVAPRS	1.14	0.18	Putative uncharacterized protein BCL9L (137); B-cell CLL/lymphoma 9-like protein (137)
LMWKRMKNLRGGS	0.89	0.13	cDNA FLJ41851 fis, clone NT2RI3003925, highly similar to Endothelial PAS domain-containing protein 1 (207); Endothelial PAS domain-containing protein 1 (741); Putative uncharacterized protein EPAS1 (732)
RAKKANKRGDWRD	0.78	0.17	Endonuclease VIII-like 2 (154)
FDPANGKFSKSAT	0.56	0.2	cDNA FLJ60696, highly similar to Elongation factor 2 (272); cDNA FLJ58164, highly similar to Elongation factor 2 (272); Elongation factor 2 (272); EEF2 protein (272)
KREEEGKSDLDSD	0.57	0.15	Homeobox protein goosecoid (250)
RTPSVGKAMDTPK	0.66	0.23	Antigen KI-67 (2264)
MQPASAKWYDRRD	0.66	0.21	cDNA FLJ59832, moderately similar to Prostaglandin E synthase 3 (EC 5.3.99.3) (7); cDNA FLJ59888, moderately similar to Prostaglandin E synthase 3 (EC 5.3.99.3) (7); cDNA FLJ59942, highly similar to Prostaglandin E synthase 3 (EC 5.3.99.3) (7); Prostaglandin E synthase 3 (Cytosolic), isoform CRA_d (7); Prostaglandin E synthase 3 (7)
YVLQDNKFRLLTQ	0.49	0.1	cDNA, FLJ79549, highly similar to Trafficking protein particle complex subunit6B (34); cDNA FLJ50482, moderately similar to Trafficking protein particle complex subunit6B (36); Trafficking protein particle complex subunit 6B (98)
LILNNLKTLLWKK	1.15	0.19	cDNA FLJ55605 (408); Protein FAM69A (415)
EKRVNSKFDTIYQ	1.03	0.21	Tripartite motif-containing 25 variant (287); E3 ubiquitin/ISG15 ligase TRIM25 (273)
RHAQGEKTAGINV	0.66	0.1	T-complex protein 1 subunit delta (489); T-complex protein 1 subunit delta (464); T-complex protein 1 subunit delta (339); T-complex protein 1 subunit delta (433); T-complex protein 1 subunit delta (459)
IRIAAYKSILQER	1.12	0.16	ATP-dependent DNA helicase 2 subunit 2 (265); Putative uncharacterized protein XRCC5 (101)
SKKKGHKNNVTNS	0.71	0.09	cDNA FLJ77253, highly similar to Homo sapiens nuclear receptor interacting protein 1 (NRIP1), mRNA (966); Nuclear receptor-interacting protein 1 (966)
SRRKNEKYLGFGT	0.87	0.12	ATP-dependent Clp protease ATP-binding subunit clpX-like, mitochondrial (437); Putative uncharacterized protein DKFZp586J151 (437)
GSSPGMKDIPRTP	0.63	0.13	KIAA0324 (499); Serine/arginine repetitive matrix protein 2 (1467)
RDDFEKKMADFHK	0.84	0.18	Thyroid hormone receptor-associated protein 3 (421)
CNCLLLKVNQIGS	0.59	0.12	Enolase (44); Enolase (343); Enolase (300); Alpha-enolase (343); Beta-enolase (343); Gamma-enolase (343); Enolase (93); Enolase (181); Enolase (63)
AVVKTQKKEGKKR	0.86	0.17	Histone H2B type 1-A (25)
KKEQENKTLVLSD	0.75	0.14	MLL3 protein (2247); Putative uncharacterized protein MLL3 (308); Histone-lysine N-methyltransferase MLL3 (2802); Putative uncharacterized protein MLL3 (1863)
NKKKKKKLKDKKE	0.88	0.41	Putative uncharacterized protein CHD5 (102); Chromodomain-helicase-DNA-binding protein 5 (102); cDNA FLJ45103 fis, clone BRAWH3032571, moderately similar to Chromodomain helicase-DNA-binding protein 4 (102)
QAKKEDKETSAKR	0.66	0.2	Ubiquitin carboxyl-terminal hydrolase (461); Ubiquitin carboxyl-terminal hydrolase (14); Ubiquitin carboxyl-terminal hydrolase 8 (538)
VIEDKPKLEKDKG	0.27	0.1	Sperm-associated antigen 17 (156)
KNKVEKKLEEKEA	0.59	0.09	Sperm flagellar protein 2 (892)
ILSPRSKESVPEF	0.42	0.06	Stathmin (29); Stathmin (51)
QPKKQPKKDEEGQ	0.6	0.1	PC4 and SFRS1-interacting protein (232); PSIP1 protein (232)
EKAIKEKEYEIER	0.45	0.09	cDNA FLJ61543, highly similar to Desmoplakin (1167); Desmoplakin (1167); DSP variant protein (1214)
PPQKSLKELQEMD	0.59	0.1	cDNA, FLJ92068, highly similar to Homo sapiens Rho GDP dissociation inhibitor (GDI) beta (ARHGDIB),mRNA (33); Rho GDP-dissociation inhibitor 2 (33)
LLASNKKKWEQAL	0.55	0.08	cDNA FLJ78365 (242); Putative uncharacterized protein C2orf39 (71); UPF0407 protein C2orf39 (242)
VAFYKKKLELKED	0.58	0.1	cDNA FLJ75337 (59); URB2 protein (59); Unhealthy ribosome biogenesis protein 2 homolog (59)
LSIPKFKVEKMID	0.43	0.06	cDNA FLJ57640, highly similar to Serpin B5 (189); Serpin B5 (277)
PKGSSLKIEERAE	0.46	0.07	cDNA FLJ76646, highly similar to Homo sapiens caldesmon 1 (CALD1), transcript variant 3, mRNA (416); cDNA FLJ59374, highly similar to Homo sapiens caldesmon 1 (CALD1), transcript variant 2, mRNA (339); cDNA FLJ55017, highly similar to Caldesmon (164); cDNA FLJ53193, highly similar to Homo sapiens caldesmon 1 (CALD1), transcript variant 5, mRNA (395); Putative uncharacterized protein CALD1 (390); …
QLFAKNKESQREK	0.67	0.1	AMOT protein (136); Putative uncharacterized protein AMOT (313); Angiomotin (545)
AKENLKKIQEMEK	0.7	0.17	cDNA FLJ57642, highly similar to Homo sapiens spire homolog 1 (SPIRE1), mRNA (50); Putative uncharacterized protein SPIRE1 (127); Protein spire homolog 1 (247)
AWTEDSKRIAVVG	0.63	0.09	Putative uncharacterized protein WDR1 (115); cDNA FLJ45763 fis, clone N1ESE2000698, highly similar to WD repeat protein 1 (80); WD repeat domain 1, isoform CRA_a (115); WD repeat-containing protein 1 isoform 1 variant (115); WD repeat-containing protein 1 isoform 1 variant (133); WD repeat-containing protein 1 (115)
VFYRSYKEQESKK	0.64	0.08	DNA-directed RNA polymerase (814); DNA-directed RNA polymerase (740); DNA-directed RNA polymerase (808); DNA-directed RNA polymerase (724); DNA-directed RNA polymerase II subunit RPB2 (815)
IEDRHRKNNEKAQ	0.86	0.22	Spectrin, beta, erythrocytic (1258); Beta-spectrin (323); Spectrin, beta, erythrocytic (Includes spherocytosis, clinical type I) variant (1262); Spectrin beta chain, erythrocyte (1258)
RARSKGKNSDEEA	0.84	0.14	Inhibitor of growth family member 4 variant deltaEx2 (124); Inhibitor of growth family member 4 variant deltaEx6A (148); cDNA FLJ53613, highly similar to Inhibitor of growth protein 4 (148); cDNA FLJ52468, highly similar to Inhibitor of growth protein 4 (96); Putative uncharacterized protein ING4 (141); Inhibitor of growth protein 4 (148); ING4 exon 4-5 boundary 12 bp skip variant (144); ING4 exo…
KKNKVEKKLEEKE	0.66	0.11	Sperm flagellar protein 2 (891)
PKFKVEKMIDPKA	0.75	0.09	cDNA FLJ57640, highly similar to Serpin B5 (192); Serpin B5 (280)
ZZZZSDKPDMAEI	0.94	0.15	cDNA, FLJ92006, Homo sapiens thymosin, beta 4, X chromosome (TMSB4X), mRNA (8); TMSB4X protein (34); TMSB4X protein (33); TMSB4X protein (27); TMSB4X protein (29); HCG1780554 (8); Putative thymosin beta-4-like protein 2 (8); Thymosin beta-4-like protein 3 (8); Thymosin beta-4 (8)
EEVILKKMSPQEL	0.89	0.11	cDNA FLJ56521, highly similar to Homo sapiens transcription termination factor, RNA polymerase I (TTF1), mRNA (688); Putative uncharacterized protein TTF1 (688); Transcription termination factor 1 (688)
LKHNLEKVEGERK	0.63	0.09	Rho-associated protein kinase 1 (647)
ASGADSKGDDLST	0.45	0.09	Transitional endoplasmic reticulum ATPase (8)
GKLEEVKTPKNPV	0.57	0.15	cDNA FLJ78763 (612); cDNA FLJ34845 fis, clone NT2NE2011221, highly similar to Homo sapiens cell division cycle associated 2 (CDCA2), mRNA (26); Cell division cycle-associated protein 2 (628)
MCEMEKKLKEERE	0.74	0.16	Rho-associated protein kinase 1 (719)
EDLTRLKETIDNN	1.14	0.24	cDNA, FLJ93685, highly similar to Homo sapiens eukaryotic translation initiation factor 3, subunit 6 48kDa (EIF3S6), mRNA (193); Eukaryotic translation initiation factor 3, subunit 6 48kDa, isoform CRA_b (144); Eukaryotic translation initiation factor 3 subunit E (193); EIF3S6 protein (193)
QALEGLKMVEKDQ	0.95	0.2	cDNA, FLJ92047, Homo sapiens ribosomal protein S19 (RPS19), mRNA (111); Ribosomal protein S19 (123); 40S ribosomal protein S19 (111)
SSEFAKKKSILEQ	1.16	0.22	cDNA FLJ76871, highly similar to Homo sapiens DEAH (Asp-Glu-Ala-His) box polypeptide 38 (DHX38), mRNA (522); cDNA FLJ55900, highly similar to Pre-mRNA-splicing factor ATP-dependent RNA helicase PRP16 (EC 3.6.1.-) (515); DEAH (Asp-Glu-Ala-His) box polypeptide 38, isoform CRA_d (195); Pre-mRNA-splicing factor ATP-dependent RNA helicase PRP16 (522)
EEPQSRKKLRMEA	0.98	0.2	Protein max (153); MYC associated factor X (144)
ERESIMKEFRSGA	1.32	0.22	Eukaryotic initiation factor 4A-III (321)
MVYGIKKYGPFVA	1.02	0.27	cDNA FLJ78635, highly similar to Homo sapiens ATP synthase, H+ transporting, mitochondrial F0 complex, subunit b, isoform 1 (ATP5F1), transcript variant 1, mRNA (115); ATP synthase subunit b, mitochondrial (115); cDNA, FLJ94101, Homo sapiens ATP synthase, H+ transporting, mitochondrial F0complex, subunit b, isoform 1 (ATP5F1), mRNA (115); ATP synthase, H+ transporting, mitochondrial F0 complex, s…
HVEEEGKGKDASG	1.24	0.43	Phosphoglycerate kinase (131); Phosphoglycerate kinase (41); Phosphoglycerate kinase (103); Phosphoglycerate kinase 1 (131)
PEVTALKVPEZZZ	0.99	0.3	Ethanolamine kinase 1 (449)
ASPELQKQIRQLE	1.06	0.19	cDNA FLJ55939, highly similar to Peroxisomal membrane protein 11B (29); Peroxisomal membrane protein 11B (43)
RTRRAVKFQRAIT	1.2	0.23	Ribosomal protein L24, isoform CRA_e (77); Putative uncharacterized protein RPL24 (77); 60S ribosomal protein L24 (77)
RHMGIGKRKGTAN	1.33	0.21	Ribosomal protein L19 (80); Ribosomal protein L19 (61); 60S ribosomal protein L19 (80)
IKKEEKKEPKKEV	0.82	0.18	Microtubule-associated protein 1B, isoform CRA_a (568); MAP1B protein (694); Microtubule-associated protein 1B (694)
ZZZZZMKAAVDLK	1.27	0.17	cDNA FLJ75737, highly similar to Homo sapiens v-ets erythroblastosis virus E26 oncogene homolog 1 (avian) (ETS1), mRNA (7); Ets-1 p27 (7); cDNA FLJ59231, highly similar to C-ets-1 protein (7); Protein C-ets-1 (7); V-ets erythroblastosis virus E26 oncogene homolog 1 (Avian) (7); ETS1 protein (7); V-ets erythroblastosis virus E26 oncogene homolog 1 (Avian), isoform CRA_a (7)
AVSKFGKKDSLGT	1.11	0.19	Long-chain-fatty-acid--CoA ligase 4 (92); cDNA FLJ57028, highly similar to Long-chain-fatty-acid--CoA ligase 4 (EC 6.2.1.3) (92); Acyl-CoA synthetase long-chain family member 4, isoform CRA_b (51); Acyl-CoA synthetase 4 (51)
SPGNLNKNMQAKS	1.06	0.17	cDNA, FLJ92829, highly similar to Homo sapiens MADS box transcription enhancer factor 2, polypeptide C (myocyte enhancer factor 2C) (MEF2C), mRNA (234); Putative uncharacterized protein MEF2C (232); Myocyte-specific enhancer factor 2C (234)
SNDLSQKLYATME	0.87	0.17	CREBBP (44); CREBBP (42); CREB-binding protein (1620); Histone acetyltransferase p300 (1583); CREBBP variant protein (1650)
LEKLIEKNYFLHK	1.18	0.21	ATP-dependent RNA helicase DDX18 (571); Putative uncharacterized protein DDX18 (447); cDNA FLJ33908 fis, clone CTONG2008518, highly similar to DEAD/H (Asp-Glu-Ala-Asp/His) box polypeptide 18 (309)
QNCRKRKLENIVE	1.08	0.2	cDNA FLJ51002, highly similar to Nuclear factor erythroid 2-related factor 2 (502); cDNA, FLJ79047, highly similar to Nuclear factor erythroid 2-related factor 2 (502); Putative uncharacterized protein NFE2L2 (246); Nuclear factor erythroid 2-related factor 2 (518)
KSIYGEKFEDENF	1.15	0.1	Peptidyl-prolyl cis-trans isomerase (82); Peptidyl-prolyl cis-trans isomerase A (82); cDNA FLJ75025, highly similar to Homo sapiens peptidylprolyl isomerase A (cyclophilin A) (PPIA), transcript variant 2, mRNA (22)
SRGNKKKPGMPNV	1.2	0.2	Histone acetyltransferase p300 (1570)
EFYELDKKENIRQ	1.27	0.28	cDNA, FLJ92901, highly similar to Homo sapiens phosphomannomutase 2 (PMM2), mRNA (149); cDNA FLJ50559, highly similar to Phosphomannomutase 2 (EC 5.4.2.8) (24); cDNA FLJ52163, highly similar to Phosphomannomutase 2 (EC 5.4.2.8) (66); Phosphomannomutase 2 (149); Phosphomannomutase 2 variant (68)
HDIDDVKKFKPGY	1.21	0.2	Putative uncharacterized protein PPA2 (122); cDNA FLJ76209, highly similar to Homo sapiens inorganic pyrophosphatase 2 (PPA2), transcript variant 2, mRNA (164); cDNA FLJ60819, highly similar to Inorganic pyrophosphatase 2, mitochondrial (EC 3.6.1.1) (224); Putative uncharacterized protein PPA2 (111); Inorganic pyrophosphatase 2, mitochondrial (224)
KGATYGKPVHHGV	1.29	0.35	Ribosomal protein L15 (83); 60S ribosomal protein L15 (83)
DVEYKKKQDPYLL	1.28	0.53	cDNA, FLJ95314, highly similar to Homo sapiens transducin (beta)-like 2 (TBL2), transcript variant 1, mRNA (315); cDNA FLJ55528, highly similar to Transducin beta-like 2 protein (279); cDNA FLJ56267, highly similar to Transducin beta-like 2 protein (186); cDNA FLJ90138 fis, clone HEMBB1000905, weakly similar to TRANSCRIPTIONAL REPRESSOR RCO-1 (315); TBL2 protein (315); Transducin beta-like protei…
IITADPKKELENL	1.14	0.23	KIF1-binding protein (563)
DDYDKKKLVKAFK	1.33	0.22	Eukaryotic translation initiation factor 1 (58); Eukaryotic translation initiation factor 1b (58); cDNA, FLJ92189, Homo sapiens translation factor sui1 homolog (GC20), mRNA (58); cDNA, FLJ92128, Homo sapiens putative translation initiation factor (SUI1), mRNA (58)
KPKGTFKDYVRDR	1.15	0.24	cDNA FLJ75737, highly similar to Homo sapiens v-ets erythroblastosis virus E26 oncogene homolog 1 (avian) (ETS1), mRNA (305); Ets-1 p27 (89); Protein C-ets-1 (305); V-ets erythroblastosis virus E26 oncogene homolog 1 (Avian) (305); ETS1 protein (305); Putative uncharacterized protein DKFZp686D0662 (349)
EVQKMKKAVESLM	1.44	0.22	cDNA FLJ54647, highly similar to Liprin-beta-1 (138); Liprin-beta-1 (310)
SDEEAPKTAQKKL	1.14	0.24	Inhibitor of growth family member 4 variant deltaEx2 (132); Inhibitor of growth family member 4 variant deltaEx6A (156); cDNA FLJ53613, highly similar to Inhibitor of growth protein 4 (156); cDNA FLJ52468, highly similar to Inhibitor of growth protein 4 (104); Putative uncharacterized protein ING4 (149); Inhibitor of growth protein 4 (156); ING4 exon 4-5 boundary 12 bp skip variant (152); ING4 ex…
LIKENLKEIAKLI	1.37	0.2	Methylmalonate-semialdehyde dehydrogenase [acylating], mitochondrial (117); Methylmalonate semialdehyde dehydrogenase (110); Aldehyde dehydrogenase 6A1 variant (117)
APRPPPKPMZZZZ	1.16	0.24	Ribosomal protein 26 (RPS26) pseudogene (113); 40S ribosomal protein S26 (113); Putative 40S ribosomal protein S26-like 1 (113)
TGAESDKTEKSVL	1.14	0.2	GARNL1 protein (1433); Ral GTPase-activating protein subunit alpha-1 (1420)
INPDKKKSKKSSE	1.26	0.2	cDNA FLJ59851, highly similar to DNA methyltransferase 1-associated protein 1 (37); cDNA FLJ54124, highly similar to DNA methyltransferase 1-associated protein 1 (37); cDNA FLJ59979, highly similar to DNA methyltransferase 1-associated protein 1 (37); cDNA FLJ59982, highly similar to DNA methyltransferase 1-associated protein 1 (37); cDNA FLJ59984, moderately similar to DNA methyltransferase 1-as…
LTRRNGKQWLLGK	1.3	0.19	Fumarylacetoacetate hydrolase domain-containing protein 2B (203)
RLDLNRKEVLTLR	1.34	0.22	Putative helicase MOV-10 (148); Mov10, Moloney leukemia virus 10, homolog (Mouse), isoform CRA_a (92); cDNA FLJ13235 fis, clone OVARC1000304, highly similar to PROTEIN MOV-10 (148)
TTQFVPKQYRLVE	1.18	0.16	cDNA FLJ60649, highly similar to Sentrin-specific protease 2 (EC 3.4.22.-) (142); cDNA FLJ61308, highly similar to Sentrin-specific protease 2 (EC 3.4.22.-) (95); cDNA FLJ56470, highly similar to Sentrin-specific protease 2 (EC 3.4.22.-) (261); cDNA FLJ54905, highly similar to Sentrin-specific protease 2 (EC 3.4.22.-) (346); Sentrin-specific protease 2 (271)
NRLKQIKEFHRKH	1.65	0.22	cDNA FLJ78246, highly similar to Homo sapiens splicing factor 3a, subunit 3, 60kDa (SF3A3), mRNA (92); cDNA FLJ78053, highly similar to Homo sapiens splicing factor 3a, subunit 3, 60kDa (SF3A3), mRNA (92); cDNA FLJ46581 fis, clone THYMU3043200, highly similar to Splicing factor 3A subunit 3 (92); Splicing factor 3a, subunit 3 variant (92); Splicing factor 3A subunit 3 (92)
RRKRMEKMAEQQA	1.28	0.14	cDNA, FLJ94167 (465); Uncharacterized protein C1orf114 (466)
SREVQQKIEKQYD	1.28	0.18	cDNA FLJ57759, moderately similar to Transgelin-2 (17); Transgelin-2 (17)
SYKVGDKIATRKA	1.22	0.2	cDNA FLJ32530 fis, clone SMINT2000185, highly similar to TRANSKETOLASE (EC 2.2.1.1) (49); cDNA FLJ36348 fis, clone THYMU2007025, highly similar to TRANSKETOLASE (EC 2.2.1.1) (231); cDNA FLJ54957, highly similar to Transketolase (EC 2.2.1.1) (322); cDNA FLJ53217, highly similar to Transketolase (EC 2.2.1.1) (116); cDNA FLJ56274, highly similar to Transketolase (EC 2.2.1.1) (267); Transketolase var…
KGQAVRKQLWDVA	1.26	0.18	Glycogen [starch] synthase, liver (387)
TLFPSSKKLKKDN	1.19	0.2	Zinc finger protein 828 (617)
VCKECGKTFSGKS	1.67	0.43	Zinc finger protein OZF (135)
NAYITGKNLLMQA	1.09	0.24	3-oxo-5-alpha-steroid 4-dehydrogenase 3 (193)
IKEIFDKAISARK	1.06	0.19	cDNA FLJ38770 fis, clone KIDNE2016000, highly similar to Epoxide hydrolase 2 (EC 3.3.2.3) (28); cDNA FLJ39451 fis, clone PROST2009273, highly similar to Epoxide hydrolase 2 (EC 3.3.2.3) (41); cDNA FLJ59619, highly similar to Epoxide hydrolase 2 (EC 3.3.2.3) (94); cDNA FLJ54951, highly similar to Epoxide hydrolase 2 (EC 3.3.2.3) (94); Epoxide hydrolase 2 (94)
LRISDDKYGRIRL	1.07	0.11	cDNA, FLJ92603, Homo sapiens archain 1 (ARCN1), mRNA (309); Coatomer subunit delta variant 2 (350); cDNA FLJ51620, highly similar to Coatomer subunit delta (221); Coatomer subunit delta (309); Putative uncharacterized protein DKFZp686M09245 (350)
LVDDFEKKFNALK	1.06	0.08	ATP5H protein (72); ATP synthase subunit d, mitochondrial (72)
LVRAAQKAAFGKA	1.11	0.19	cDNA FLJ61113, highly similar to Talin-2 (93); Talin-2 (2477)
KQNGHIKFLTKGD	1.31	0.22	SEC11-like 1 (S. cerevisiae), isoform CRA_d (84); SPC18 protein (110); Signal peptidase complex SPC-18 (119); Signal peptidase complex catalytic subunit SEC11A (110); Putative signal peptidase complex catalytic subunit SEC11B (97)
PPGKSGKYYYQLN	1.02	0.09	CBX4 protein (149); E3 SUMO-protein ligase CBX4 (149)
EELAAQKRQLENM	1.12	0.19	cDNA FLJ76043, highly similar to Homo sapiens cyclin T1 (CCNT1), mRNA (404); Cyclin-T1 (404)
LRDDFEKKMADFH	1.53	0.21	Thyroid hormone receptor-associated protein 3 (420)
LLVQPTKRPEGRT	1.17	0.23	Enhancer of rudimentary homolog (12)
SEFLLSKRHAIMP	1.15	0.2	DNHD1 variant protein (13)
IEKMKEKRQAKYS	1.02	0.18	SRGAP3:RAF1 fusion protein (224); SRGAP3 protein (104); KIAA1156 protein (93); SLIT-ROBO Rho GTPase-activating protein 1 (224); SLIT-ROBO Rho GTPase-activating protein 3 (224)
MRKLWSKKLITDD	0.93	0.11	Olfactory receptor 4C16 (302)
DPEFTAKTPKDSP	1.08	0.22	cDNA FLJ56618, highly similar to Ribosomal protein S6 kinase alpha-3 (EC 2.7.11.1) (336); cDNA FLJ56653, highly similar to Ribosomal protein S6 kinase alpha-3 (EC 2.7.11.1) (335); cDNA, FLJ79381, highly similar to Ribosomal protein S6 kinase alpha-3 (EC 2.7.11.1) (336); RPS6KA6 protein (367); Ribosomal protein S6 kinase alpha-3 (364); Ribosomal protein S6 kinase alpha-6 (367)
IQKVFTKHGLLKL	1.12	0.11	GrpE protein homolog (136); GrpE protein homolog 1, mitochondrial (157)
LADKEVKRPQHSQ	1.27	0.2	Brefeldin A-inhibited guanine nucleotide-exchange protein 2 (25); ARFGEF2 protein (25)
INGQEVKYALGER	1.14	0.15	cDNA FLJ51712, moderately similar to Leukotriene A-4 hydrolase (EC 3.3.2.6) (73); cDNA FLJ51009, highly similar to Leukotriene A-4 hydrolase (EC 3.3.2.6) (49); cDNA FLJ52432, highly similar to Leukotriene A-4 hydrolase (EC 3.3.2.6) (23); Leukotriene A-4 hydrolase (73); Leukotriene A4 hydrolase variant (76)
KEVRNLKWLGFRV	1.15	0.14	Cytoplasmic dynein 1 heavy chain 1 (754)
LERSDKKAYEEAQ	1.4	0.23	DEAH (Asp-Glu-Ala-His) box polypeptide 16 (143); DEAH (Asp-Glu-Ala-His) box polypeptide 16 (203); cDNA FLJ53577, highly similar to pre-mRNA-splicing factor ATP-dependentRNA helicase DHX16 (EC 3.6.1.-) (143); Putative pre-mRNA-splicing factor ATP-dependent RNA helicase DHX16 (203); cDNA, FLJ92560, highly similar to Homo sapiens DEAH (Asp-Glu-Ala-His) box polypeptide 16 (DHX16), mRNA (203)
TDVEYKKKQDPYL	1.38	0.21	cDNA, FLJ95314, highly similar to Homo sapiens transducin (beta)-like 2 (TBL2), transcript variant 1, mRNA (314); cDNA FLJ55528, highly similar to Transducin beta-like 2 protein (278); cDNA FLJ56267, highly similar to Transducin beta-like 2 protein (185); cDNA FLJ90138 fis, clone HEMBB1000905, weakly similar to TRANSCRIPTIONAL REPRESSOR RCO-1 (314); TBL2 protein (314); Transducin beta-like protei…
NQLLKQKGQLEDL	1.45	0.24	CCDC88A protein (1208); Putative uncharacterized protein CCDC88A (384); Putative uncharacterized protein CCDC88A (194); Putative uncharacterized protein CCDC88A (411); Girdin (1209); cDNA FLJ10392 fis, clone NT2RM4000169, weakly similar to INTRACELLULAR PROTEIN TRANSPORT PROTEIN USO1 (88); KIAA1212 protein (168)
QKREVTKEEYKDI	1.87	0.32	Putative uncharacterized protein (40); PHRF1 protein (1588); PHRF1 protein (1585); PHRF1 protein (1587); PHD and ring finger domains 1 (1589); PHD and RING finger domain-containing protein 1 (1589)
NPEVGMKYRNLIL	1.33	0.15	cDNA FLJ76106, highly similar to Homo sapiens neurolysin (metallopeptidase M3 family) (NLN), mRNA (664); Neurolysin, mitochondrial (664); Putative uncharacterized protein DKFZp564F123 (292); cDNA FLJ14696 fis, clone NT2RP2005775, highly similar to NEUROLYSIN (EC 3.4.24.16) (341)
LEAVFGKYGRIVE	1.13	0.15	cDNA FLJ59107, moderately similar to Heterogeneous nuclear ribonucleoprotein G (30); Heterogeneous nuclear ribonucleoprotein G (30); cDNA FLJ38696 fis, clone KIDNE2001931, highly similar to HETEROGENEOUS NUCLEAR RIBONUCLEOPROTEIN G (30)
QQSGYGKVSRRGG	1.16	0.12	cDNA FLJ54150, highly similar to Heterogeneous nuclear ribonucleoprotein D0 (289); cDNA FLJ61020, highly similar to Heterogeneous nuclear ribonucleoprotein D0 (187); Putative uncharacterized protein HNRNPD (267); Heterogeneous nuclear ribonucleoprotein D0 (341)
QLLEDDKHLSDYC	1.16	0.13	Ubiquitin-like protein 4B (54)
LLDLAQKHLGGIP	1.41	0.17	cDNA FLJ51625, highly similar to Ubiquinol-cytochrome-c reductase complex coreprotein I, mitochondrial (EC 1.10.2.2) (133); Cytochrome b-c1 complex subunit 1, mitochondrial (248)
LYATMEKHKEVFF	1.27	0.12	CREB-binding protein (1627); Histone acetyltransferase p300 (1590); CREBBP variant protein (1657)
FIGRESKYCGLCD	0.95	0.11	cDNA FLJ51849, highly similar to Mitochondrial carrier homolog 2 (10); Mitochondrial carrier homolog 2 (158); Mitochondrial carrier homolog 2 variant (158)
LCCYHAKHCQENK	1	0.13	CREB-binding protein (1831); Histone acetyltransferase p300 (1794); CBP (312); CREBBP variant protein (1861)
KVECGPKYPEAPP	1.18	0.09	cDNA, FLJ93989, Homo sapiens ubiquitin-conjugating enzyme E2 variant 2 (UBE2V2),mRNA (72); Ubiquitin-conjugating enzyme E2 variant 2 (72)
VVPTFGKKKGPNA	1.11	0.09	40S ribosomal protein S30 (51)
FKRLFAKYGEPGE	1.53	0.1	SFPQ protein (319); Splicing factor proline/glutamine-rich (Polypyrimidine tract binding protein associated) (319); SFPQ protein (246); Splicing factor, proline- and glutamine-rich (319)
IDAHLNKVCPTTE	1.32	0.17	cDNA FLJ36845 fis, clone ASTRO2013050, weakly similar to UBIQUITIN-ACTIVATING ENZYME E1 (292); Ubiquitin-like modifier-activating enzyme 6 (544)
ELAQYQKWDKMRR	1.01	0.09	cDNA, FLJ79494, highly similar to Structural maintenance of chromosome 3 (215); Structural maintenance of chromosomes 3 (215); Structural maintenance of chromosomes protein 3 (215)
ALVGVVKEAZZZZ	1.28	0.1	GrpE protein homolog (194); GrpE protein homolog 1, mitochondrial (215)
TYHAIQKYFSAKS	1.27	0.13	cDNA FLJ50848, highly similar to Homo sapiens suppressor of var1, 3-like 1 (S. cerevisiae) (SUPV3L1), mRNA (89); ATP-dependent RNA helicase SUPV3L1, mitochondrial (220)
IKALGAKHCVKEV	1.35	0.14	Putative uncharacterized protein C21orf33 (208); Putative uncharacterized protein C21orf33 (135); Putative uncharacterized protein PWP2 (198); ES1 protein homolog, mitochondrial (219)
EKVMYEKEAKQQE	1.43	0.31	cDNA FLJ57496, moderately similar to Tubulin-specific chaperone A (28); cDNA, FLJ92496, Homo sapiens tubulin-specific chaperone a (TBCA), mRNA (28); Tubulin-specific chaperone A (28)
NELSDLKEDKPRK	1.2	0.31	BRCA1 associated RING domain 1 (124); cDNA, FLJ95007, highly similar to Homo sapiens BRCA1 associated RING domain 1 (BARD1), mRNA (124); BRCA1-associated RING domain protein 1 (124); BRCA1 associated RING domain 1 variant (124)
ITEATLKHLDKAY	1.07	0.09	Adenylate cyclase type 7 (422); cDNA FLJ36387 fis, clone THYMU2008799, highly similar to Adenylate cyclase type 7 (EC 4.6.1.1) (422)
KAECLEKFPVIQH	1.37	0.1	Protein phosphatase 2A activator, regulatory subunit 4 (308); Protein phosphatase 2A activator, regulatory subunit 4 (40); Serine/threonine-protein phosphatase 2A regulatory subunit B' (337); Putative uncharacterized protein DKFZp781M17165 (83)
VEAIFSKYGKIAG	1.11	0.1	LOC440563 protein (39); LOC649330 protein (39); Heterogeneous nuclear ribonucleoprotein C-like (39); Heterogeneous nuclear ribonucleoprotein C-like 1 (39); HNRPCL1 protein (39)
HEELMKKTETMNV	1.69	0.22	Tpr (1265); Nucleoprotein TPR (1265)
LTELNTKVKEKFQ	1.2	0.23	Vesicle transport protein SEC20 (46)
CNEKLGKSVVAKV	1.55	0.19	Sialic acid synthase (293)
QCNKSGKAFNCSS	1.59	0.35	Zinc finger protein 611 (238)
RVVALDKNFHMKC	1.38	0.2	cDNA FLJ53160, highly similar to Zyxin (441); Zyxin, isoform CRA_a (371); cDNA FLJ61463, highly similar to Zyxin (472); ESP-2 (449); ZYX protein (422); ZYX protein (537); Zyxin (528)
KDMLEKKVKKVVV	1.47	0.29	Putative heat shock protein HSP 90-alpha A5 (267)
KSSYADKAPSRSL	1.61	0.34	cDNA FLJ61059, highly similar to Homo sapiens SMC5 structural maintenance of chromosomes 5-like 1 (SMC5L1), mRNA (548); Structural maintenance of chromosomes protein 5 (548)
FFTTPSKSVRKAS	1.27	0.23	cDNA FLJ52304, highly similar to Ribosomal L1 domain-containing protein 1 (248); Ribosomal L1 domain-containing protein 1 (468)
YVPDKKKAPSSPP	1.18	0.25	Protein Shroom2 (309)
TKKDNMKYASWAA	0.96	0.16	cDNA FLJ76169 (255); KIAA0103 variant (255); Tetratricopeptide repeat protein 35 (255)
ENDEEMKAAKEKL	1.38	0.17	Bromodomain containing 1, isoform CRA_a (516); cDNA FLJ51158, highly similar to Bromodomain-containing protein 1 (209); cDNA FLJ61578, highly similar to Bromodomain-containing protein 1 (516); cDNA FLJ51191, highly similar to Bromodomain-containing protein 1 (111); Bromodomain-containing protein 1 (516); Bromodomain containing protein 1 variant (110); BRD1 protein (516); Putative uncharacterized …
LNQYFQKEKIQGE	1.29	0.16	ATP-dependent RNA helicase A (191); DHX9 protein (191)
EMACNEKLGKSVV	1.05	0.21	Sialic acid synthase (290)
ARFALQKLEEAKK	1.27	0.18	cDNA FLJ50185, weakly similar to Homo sapiens translocase of outer mitochondrial membrane 34 (TOMM34), mRNA (57); RNA polymerase II-associated protein 3 (216)
DLEKMLKVEQEKM	1.22	0.21	CCDC88A protein (1219); Putative uncharacterized protein CCDC88A (395); Putative uncharacterized protein CCDC88A (205); Putative uncharacterized protein CCDC88A (422); Girdin (1220); cDNA FLJ10392 fis, clone NT2RM4000169, weakly similar to INTRACELLULAR PROTEIN TRANSPORT PROTEIN USO1 (99); KIAA1212 protein (179)
SAFDLKKKNLACE	1.1	0.19	cDNA FLJ78259 (321); cDNA FLJ10623 fis, clone NT2RP2005520, highly similar to Structural maintenance of chromosome 2-like 1 protein (321); SMC2 protein (321); Chromosome-associated protein E (321); SMC2 protein (176); Structural maintenance of chromosomes protein 2 (321)
EGKISSKTAAKLS	1.07	0.18	Putative uncharacterized protein UBE2E2 (48); Ubiquitin-conjugating enzyme E2 E2 (48)
YPVLYGKYLNGLG	1.06	0.12	cDNA FLJ12419 fis, clone MAMMA1003047, highly similar to Protein inhibitor of activated STAT protein 4 (114); E3 SUMO-protein ligase PIAS4 (114); Protein inhibitor of activated STAT, 4 variant (114)
DLKDKTKVLEWAR	1.12	0.22	Protein FAM118A (174)
LQEGCGKISKLYG	1.11	0.21	cDNA FLJ37560 fis, clone BRCOC2000333, highly similar to Succinate dehydrogenase (ubiquinone) flavoprotein subunit, mitochondrial (EC 1.3.5.1) (313); cDNA FLJ16373 fis, clone THYMU3000269, highly similar to Succinate dehydrogenase (ubiquinone) flavoprotein subunit, mitochondrial (EC 1.3.5.1) (132); cDNA FLJ55072, highly similar to Succinate dehydrogenase (ubiquinone) flavoprotein subunit, mitocho…
SRSGSIKGSRYFQ	1.39	0.32	cDNA FLJ60677, highly similar to Splicing factor, arginine/serine-rich 7 (185); Putative uncharacterized protein SFRS7 (69); Splicing factor, arginine/serine-rich 7, 35kDa, isoform CRA_d (185); Splicing factor, arginine/serine-rich 7 (185)
TDVKKSKFCEADV	1.77	0.31	UPF0609 protein C4orf27 (27)
KMYHQLKKCETRK	1.55	0.29	Smg-5 homolog, nonsense mediated mRNA decay factor (C. elegans) (267); Protein SMG5 (267)
GVFSKDKFPGEFM	1.47	0.22	SUPT16H protein (141); FACT complex subunit SPT16 (141)
KKCETRKLSPGKK	1.39	0.62	Smg-5 homolog, nonsense mediated mRNA decay factor (C. elegans) (273); Protein SMG5 (273)
LQSLAGKHGDDLR	1.53	0.16	cDNA FLJ77754, highly similar to Homo sapiens keratin 8 (KRT8), mRNA (295); Keratin, type II cytoskeletal 8 (295); KRT8 protein (91); KRT8 protein (177)
ILYNNHKFTNASK	1.24	0.82	Protein tyrosine phosphatase, receptor type, C (329); Protein tyrosine phosphatase, receptor type, C, isoform CRA_d (377); Protein tyrosine phosphatase, receptor type, C (216); cDNA FLJ53186, highly similar to Leukocyte common antigen (EC 3.1.3.48) (311); cDNA FLJ61519, highly similar to Leukocyte common antigen (EC 3.1.3.48) (377); Receptor-type tyrosine-protein phosphatase C (375); PTPRC protei…
MEEMFHKKSEAVR	1.35	0.23	cDNA FLJ56999, highly similar to Homo sapiens calcium channel, voltage-dependent, alpha 2/delta 3 subunit, mRNA (7); Putative uncharacterized protein CACNA2D3 (7); Voltage-dependent calcium channel subunit alpha-2/delta-3 (101)
KHFVTAKKKINGI	1.18	0.18	Putative uncharacterized protein MFN2 (36); cDNA FLJ11885 fis, clone HEMBA1007203, highly similar to Transmembrane GTPase MFN2 (EC 3.6.5.-) (36); cDNA FLJ57997, highly similar to Transmembrane GTPase MFN2 (EC 3.6.5.-) (36); Mitofusin-2 (36); Mitofusin 2 (36)
PPKAAFKEPKMAL	1	0.16	Protein ENL (252)
KPGKELKVLSYPA	0.93	0.16	cDNA, FLJ93308, highly similar to Homo sapiens leukocyte-derived arginine aminopeptidase (LRAP), mRNA (138); Endoplasmic reticulum aminopeptidase 2 (138)
SVDYGKKSKLEFS	1.23	0.26	Putative uncharacterized protein TUBA4A (129); cDNA FLJ78587 (164); Tubulin, alpha 1 (Testis specific), isoform CRA_a (149); cDNA FLJ32131 fis, clone PEBLM2000267, highly similar to Tubulin alpha-ubiquitous chain (129); cDNA FLJ37398 fis, clone BRAMY2027467, highly similar to Tubulin alpha-ubiquitous chain (129); cDNA FLJ60097, highly similar to Tubulin alpha-ubiquitous chain (11); cDNA FLJ53743,…
ATQVGEKTPKDES	1.29	0.2	Vasodilator-stimulated phosphoprotein (283)
PATGAVKEKITAF	1.31	0.17	Very long-chain specific acyl-CoA dehydrogenase, mitochondrial (276); Acyl-Coenzyme A dehydrogenase, very long chain, isoform CRA_e (200); cDNA FLJ56425, highly similar to Very-long-chain specific acyl-CoAdehydrogenase, mitochondrial (EC 1.3.99.-) (322); cDNA FLJ55801, highly similar to Very-long-chain specific acyl-CoAdehydrogenase, mitochondrial (EC 1.3.99.-) (299); Acyl-Coenzyme A dehydrogenas…
KLIASQKFTDKRI	1.27	0.17	AP-1 complex subunit gamma-1 (78); cDNA FLJ46199 fis, clone TESTI4007965, highly similar to AP-1 complex subunit gamma-1 (101); Putative uncharacterized protein (78); Putative uncharacterized protein (160); Adaptor-related protein complex 1, gamma 1 subunit (78)
LETPLCKNGFLLD	1.09	0.17	cDNA FLJ55097, highly similar to Adenylate kinase isoenzyme 2, mitochondrial (EC 2.7.4.3) (93); Adenylate kinase 2, mitochondrial (93)
LEMILNKPGLKYK	1.19	0.21	Putative uncharacterized protein AKR1C1 (181); Aldo-keto reductase family 1 member C1 (179); Aldo-keto reductase family 1 member C2 (179); Aldo-keto reductase family 1 member C3 (179); Aldo-keto reductase family 1 member C4 (179); cDNA FLJ52680, highly similar to Aldo-keto reductase family 1 member C2 (EC 1.-.-.-) (153); Aldo-keto reductase family 1, member C3 (3-alpha hydroxysteroid dehydrogenas…
QYLTDPKFVERTL	1.28	0.14	cDNA FLJ40024 fis, clone STOMA2007745, highly similar to UBIQUITIN-ACTIVATING ENZYME E1 (119); cDNA FLJ54582, highly similar to Ubiquitin-activating enzyme E1 (183); cDNA FLJ53392, highly similar to Ubiquitin-activating enzyme E1 (216); Ubiquitin-like modifier activating enzyme 1 (119); Ubiquitin-like modifier-activating enzyme 1 (671)
EGYVEVKEGKTWK	1.18	0.17	cDNA, FLJ92562, highly similar to Homo sapiens lysyl oxidase-like 2 (LOXL2), mRNA (209); Lysyl oxidase homolog 2 (209); Lysyl oxidase-like 2 variant (209)
VSIPSEKQRLIYQ	1.39	0.31	HLA-B associated transcript 3 (56); HLA-B associated transcript 3, isoform CRA_a (56); cDNA FLJ60983, highly similar to Large proline-rich protein BAT3 (56); cDNA FLJ61584, highly similar to Large proline-rich protein BAT3 (56); Large proline-rich protein BAT3 (56)
GLQMRLKYSQSDL	1	0.08	cDNA FLJ77162, highly similar to Homo sapiens SMC1 structural maintenance of chromosomes 1-like 1 (SMC1L1), mRNA (713); cDNA FLJ50250, highly similar to Structural maintenance of chromosome 1-like 1 protein (479); Putative uncharacterized protein DKFZp686L19178 (691); SMC1A protein (713); Structural maintenance of chromosomes protein 1A (713)
VITEEEKNFKAFA	0.98	0.11	60S ribosomal protein L13 (174); 60S ribosomal protein L13 (127); Ribosomal protein L13 (31)
KPAELLKMFGIDR	1.37	0.2	cDNA FLJ32530 fis, clone SMINT2000185, highly similar to TRANSKETOLASE (EC 2.2.1.1) (338); cDNA FLJ36348 fis, clone THYMU2007025, highly similar to TRANSKETOLASE (EC 2.2.1.1) (520); cDNA FLJ54957, highly similar to Transketolase (EC 2.2.1.1) (611); cDNA FLJ53217, highly similar to Transketolase (EC 2.2.1.1) (405); cDNA FLJ56274, highly similar to Transketolase (EC 2.2.1.1) (556); Transketolase va…
QSAFDLKKKNLAC	1.14	0.19	cDNA FLJ78259 (320); cDNA FLJ10623 fis, clone NT2RP2005520, highly similar to Structural maintenance of chromosome 2-like 1 protein (320); SMC2 protein (320); Chromosome-associated protein E (320); SMC2 protein (175); Structural maintenance of chromosomes protein 2 (320)
LPLRPRKQATAAG	1.26	0.31	Transcription factor NF-E4 (43)
LSDIAEKFLKKDQ	1.25	0.21	Alpha thalassemia/mental retardation syndrome X-linked (967); Transcriptional regulator ATRX (967); cDNA FLJ56867, highly similar to Transcriptional regulator ATRX (EC 3.6.1.-) (140)
AKVKEFKSKLGKE	1.15	0.17	Protein TMED8 (172)
SKSTEIKWKSGKD	1.26	0.23	Putative uncharacterized protein SET (149); cDNA, FLJ96345, Homo sapiens SET translocation (myeloid leukemia-associated) (SET),mRNA (159); SET nuclear oncogene (147); cDNA FLJ59759, highly similar to Protein SET (148); SET nuclear oncogene (150); SET translocation (Myeloid leukemia-associated), isoform CRA_a (172); Protein SET (172)
IKDNQQKKIQKVE	1.18	0.3	Putative uncharacterized protein LRRIQ1 (556); Leucine-rich repeat and IQ domain-containing protein 1 (581)
IKIGYGKATPTTR	0.99	0.19	RNA binding motif protein 15 isoform L2 (406); RBM15 protein (450); RBM15 protein (440); Putative RNA-binding protein 15 (450)
NEHDLLKLKKFTE	1.08	0.14	cDNA FLJ78528, highly similar to Homo sapiens vacuolar protein sorting 4B (yeast) (VPS4B), mRNA (432); cDNA FLJ75934, highly similar to Homo sapiens vacuolar protein sorting 4B (yeast) (VPS4B), mRNA (432); Vacuolar protein sorting-associated protein 4B (432)
CDEVQPKHVKEAF	1	0.14	cDNA FLJ51591, highly similar to DNA replication licensing factor MCM6 (315); DNA replication licensing factor MCM6 (643); Putative uncharacterized protein MCM6 (607)
VSSKSMKELKELC	1.12	0.14	Putative uncharacterized protein RGL4 (207); RGL4 protein (343); RGL4 protein (207); cDNA FLJ16354 fis, clone TESTI4000319, weakly similar to GUANINE NUCLEOTIDE DISSOCIATION STIMULATOR RALGDS FORM B (343); Ral-GDS-related protein (343)
AVIDKLKHGVVTS	1.2	0.11	cDNA, FLJ94908, highly similar to Homo sapiens PPAR binding protein (PPARBP), mRNA (1296); cDNA FLJ50196, highly similar to Peroxisome proliferator-activated receptor-binding protein (1139); Mediator of RNA polymerase II transcription subunit 1 (1311)
KGATISKKGFKKA	1.19	0.26	Histone H2B type 1-A (13)
TKHLHEKVNIIPL	1.26	0.2	Septin-13 (34)
EGTVEIKFRRKDL	1.15	0.17	Acetyl-CoA carboxylase 1 (2127); HCG30204, isoform CRA_b (2127); cDNA FLJ52591, highly similar to Acetyl-CoA carboxylase 1 (EC 6.4.1.2) (165); cDNA FLJ52592, highly similar to Acetyl-CoA carboxylase 1 (EC 6.4.1.2) (253); cDNA FLJ50410, highly similar to Acetyl-CoA carboxylase 1 (EC 6.4.1.2) (191); cDNA FLJ54634, highly similar to Acetyl-CoA carboxylase 1 (EC 6.4.1.2) (87); cDNA FLJ50718, highly s…
AVLDTGKYVGLVR	0.94	0.07	cDNA FLJ60080, highly similar to 130 kDa leucine-rich protein (LRP 130) (650); Leucine-rich PPR motif-containing protein, mitochondrial (750)
LRDIARKHGCAFL	0.96	0.09	cDNA FLJ56034, highly similar to 4-aminobutyrate aminotransferase, mitochondrial (EC 2.6.1.19) (333); 4-aminobutyrate aminotransferase, mitochondrial (318)
RSGLAAKHFIDVG	1	0.1	Deoxyuridine 5'-triphosphate nucleotidohydrolase, mitochondrial (179)
TAEVFKKHGVYNP	1.04	0.11	Malate dehydrogenase (50); Malate dehydrogenase, mitochondrial (157); Malate dehydrogenase (136); Malate dehydrogenase (157); Malate dehydrogenase (135)
EIVSGMKYIQHTY	0.87	0.08	Putative uncharacterized protein ARHGDIA (127); cDNA FLJ53102, moderately similar to Rho GDP-dissociation inhibitor 1 (127); Rho GDP-dissociation inhibitor 1 (127)
TFKAFSKKMDDSV	1.04	0.18	Sorting nexin 33 (386); Putative uncharacterized protein SNX33 (73); Sorting nexin-33 (386)
SLIKPIKDVDILD	1.12	0.18	cDNA FLJ45586 fis, clone BRTHA3014000, highly similar to Transcriptional-regulating factor 1 (1133); Breast cancer anti-estrogen resistance 2 (1177); Transcriptional-regulating factor 1 (1157)
KKKTKEKYIDQEE	0.87	0.11	Putative heat shock protein HSP 90-alpha A2 (282)
SAKIRAKYPDRVP	1.01	0.21	Gamma-aminobutyric acid receptor-associated protein-like 2 (24); GABA(A) receptor-associated protein-like 2, isoform CRA_b (24)
LRTEHEKYLVKHC	1.12	0.12	cDNA, FLJ96480 (126); cDNA FLJ32418 fis, clone SKMUS2000863, weakly similar to PROBABLE ASPARAGINYL-TRNA SYNTHETASE (EC 6.1.1.22) (353); cDNA: FLJ23441 fis, clone HSI00612 (126); Probable asparaginyl-tRNA synthetase, mitochondrial (353)
LRDYFEKYGKIET	1.02	0.11	Heterogeneous nuclear ribonucleoprotein A3, isoform CRA_a (126); cDNA FLJ58832, highly similar to Heterogeneous nuclear ribonucleoprotein A3 (126); Putative uncharacterized protein ENSP00000415385 (125); FBRNP (148); Heterogeneous nuclear ribonucleoprotein A3 (148)
KDVKDGKYSQVLA	1.13	0.11	Ribosomal protein S18, isoform CRA_b (94); 40S ribosomal protein S18 (94)
VATGHGKYEKVLV	1.17	0.12	cDNA FLJ76079, highly similar to Homo sapiens lymphocyte-specific protein 1 (LSP1), mRNA (327); cDNA FLJ77847 (265); cDNA FLJ32014 fis, clone NTONG1000047, highly similar to Lymphocyte-specific protein 1 (265); cDNA FLJ34752 fis, clone NESOP2000452, highly similar to Lymphocyte-specific protein 1 (455); Lymphocyte-specific protein 1 (327)
EQVNELKEKGNKA	1.11	0.07	cDNA FLJ76863, highly similar to Homo sapiens stress-induced-phosphoprotein 1 (Hsp70/Hsp90-organizing protein) (STIP1), mRNA (8); cDNA FLJ54451, highly similar to Stress-induced-phosphoprotein 1 (8); Stress-induced-phosphoprotein 1 (8)
EEEKNFKAFASLR	1.08	0.13	60S ribosomal protein L13 (177); 60S ribosomal protein L13 (130); Ribosomal protein L13 (34)
YSSKFLKHWDHLT	1.13	0.14	Enoyl-CoA hydratase, mitochondrial (118)
KDLKDLKEKVSLL	1.03	0.15	cDNA FLJ58159, highly similar to RAB6-interacting protein 2 (406); ELKS/RAB6-interacting/CAST family member 1 (658)
LAAQEIKYGPLKM	1.03	0.01	MYB/NFIB fusion protein variant 1 (409); MYB/NFIB fusion protein variant 2 (409); MYB/NFIB fusion protein variant 3 (409); Transcriptional activator Myb (480); V-myb myeloblastosis viral oncogene homolog (Avian) (530); V-myb myeloblastosis viral oncogene homolog (Avian), isoform CRA_d (480); C-myb v-myb myeloblastosis viral oncogene homologue (avian), exon 1 and joined CDS (480); V-myb myeloblast…
NLYIYSKKSSTSR	1.06	0.22	ZZ-type zinc finger-containing protein 3 (725)
LKRFDDKYTLKLT	1.14	0.08	cDNA FLJ56339, highly similar to Signal peptidase complex subunit 2 (EC 3.4.-.-) (169); Signal peptidase complex subunit 2 (169)
KLYGDLKHLKTFD	1.26	0.08	cDNA FLJ37560 fis, clone BRCOC2000333, highly similar to Succinate dehydrogenase (ubiquinone) flavoprotein subunit, mitochondrial (EC 1.3.5.1) (322); cDNA FLJ16373 fis, clone THYMU3000269, highly similar to Succinate dehydrogenase (ubiquinone) flavoprotein subunit, mitochondrial (EC 1.3.5.1) (141); cDNA FLJ55072, highly similar to Succinate dehydrogenase (ubiquinone) flavoprotein subunit, mitocho…
YFECQAKYGAFVK	1.19	0.1	CKAP1 protein (168); Tubulin-folding cofactor B (219)
LSTNTTKVKEFGI	0.82	0.16	Glucose-6-phosphate isomerase (224); Glucose-6-phosphate isomerase (263); Glucose-6-phosphate isomerase (235); Glucose-6-phosphate isomerase (252)
QAVLLPKKTSATV	0.93	0.21	Histone H2A.x (119)
SLALYEKADIKGP	1.05	0.11	ATP synthase subunit gamma, mitochondrial (79); cDNA FLJ59861, highly similar to ATP synthase gamma chain, mitochondrial (EC 3.6.3.14) (79); ATP synthase gamma chain (32); ATP synthase gamma chain (79); ATP synthase gamma chain (72)
KTTWVTKHAAENP	1.13	0.14	cDNA FLJ44920 fis, clone BRAMY3011501, highly similar to Heterogeneous nuclear ribonucleoprotein U (441); cDNA FLJ54020, highly similar to Heterogeneous nuclear ribonucleoprotein U (475); Heterogeneous nuclear ribonucleoprotein U (516); Heterogeneous nuclear ribonucleoprotein U (Scaffold attachment factor A) (414); Heterogeneous nuclear ribonucleoprotein U (Scaffold attachment factor A) (240); He…
NEEISVKHLPSTE	0.97	0.14	cDNA FLJ75163, highly similar to Homo sapiens heterogeneous nuclear ribonucleoprotein U-like 1 (HNRPUL1), transcript variant 4, mRNA (170); cDNA FLJ78309, highly similar to Homo sapiens heterogeneous nuclear ribonucleoprotein U-like 1 (HNRPUL1), transcript variant 1, mRNA (270); cDNA FLJ78252, highly similar to Homo sapiens heterogeneous nuclear ribonucleoprotein U-like 1 (HNRPUL1), transcript va…
LVATPGKKGAAIP	1.19	0.1	cDNA FLJ38578 fis, clone HCHON2007674, highly similar to NUCLEOLIN (47); Putative uncharacterized protein NCL (108); Nucleolin (124); NCL protein (124)
RFLEIGKFDLSQN	1.16	0.12	Fatty acid synthase (1771); FASN protein (677)
LTREMIKHLERCE	0.91	0.08	cDNA FLJ52431, highly similar to Retinoblastoma-associated protein (436); cDNA FLJ51085, highly similar to Retinoblastoma-associated protein (527); Retinoblastoma-associated protein variant (580); RB1 protein (48); Retinoblastoma-associated protein (548)
TLKIPYKYEHNKA	1.03	0.13	Guanine nucleotide binding protein (G protein), q polypeptide (73); Guanine nucleotide-binding protein G(q) subunit alpha (102)
AKSQLLKFVEKCS	1.06	0.12	cDNA FLJ78580, highly similar to Homo sapiens MCM5 minichromosome maintenance deficient 5, cell division cycle 46 (MCM5), mRNA (392); cDNA, FLJ92902, Homo sapiens MCM5 minichromosome maintenance deficient 5, celldivision cycle 46 (S. cerevisiae) (MCM5), mRNA (392); Minichromosome maintenance complex component 5 (349); cDNA FLJ16474 fis, clone BRSSN2012254, highly similar to DNA replication licens…
STAASTKYDVFRQ	0.95	0.08	Putative uncharacterized protein SYNRG (744); Putative uncharacterized protein SYNRG (878); AP1GBP1 protein (583); Synergin gamma (744)
LAAEWGKYGMRFN	0.95	0.1	cDNA FLJ50204, highly similar to 2,4-dienoyl-CoA reductase, mitochondrial (EC 1.3.1.34) (221); 2,4-dienoyl-CoA reductase, mitochondrial (230)
DGVDAGKYTIGLG	0.91	0.12	Hydroxymethylglutaryl-CoA synthase, cytoplasmic (46); 3-hydroxy-3-methylglutaryl-Coenzyme A synthase 1 (Soluble) (46); cDNA FLJ38173 fis, clone FCBBF1000053, highly similar to HYDROXYMETHYLGLUTARYL-COA SYNTHASE, CYTOPLASMIC (46)
KKNQPGKYSQLVV	0.86	0.1	Histone H1x (47)
GEPKGAKRAKPVK	1.2	0.32	cDNA FLJ76812, highly similar to Homo sapiens IQ motif containing GTPase activating protein 2 (IQGAP2), mRNA (1474); cDNA FLJ52376, highly similar to Ras GTPase-activating-like protein IQGAP2 (764); cDNA FLJ50398, highly similar to Ras GTPase-activating-like protein IQGAP2 (970); Ras GTPase-activating-like protein IQGAP2 (1474); IQ motif containing GTPase activating protein 2 variant (1054)
ITSHFAKGPAKRK	1.23	0.21	DNA (cytosine-5)-methyltransferase 1 (173); Cytosine-specific methyltransferase (160)
QRVKFTKDHLIRK	1.22	0.15	E3 ubiquitin-protein ligase TRIM33 (252)
KTQWALKYAKENP	0.98	0.12	Heterogeneous nuclear ribonucleoprotein U-like protein 2 (471)
NRKLLEKHITAKE	1.06	0.12	Putative uncharacterized protein ITPR2 (604); Inositol 1,4,5-trisphosphate receptor type 2 (608)
RKLDNTKFRSHEG	1.43	0.35	cDNA FLJ77645, highly similar to Homo sapiens splicing factor, arginine/serine-rich 1 (splicing factor 2, alternate splicing factor) (SFRS1), mRNA (179); cDNA FLJ53078, highly similar to Splicing factor, arginine/serine-rich 1 (74); Splicing factor, arginine/serine-rich 1 (179)
TGSNSEKFSKTKK	1.27	0.32	RE1-silencing transcription factor (512); RE1-silencing transcription factor, isoform CRA_b (512); Putative uncharacterized protein REST (489)
STHDHWKALVTKK	0.9	0.17	Inorganic pyrophosphatase (228)
TDWLDGKHVVFGH	0.89	0.2	Peptidyl-prolyl cis-trans isomerase (167); Peptidyl-prolyl cis-trans isomerase F, mitochondrial (167)
GQGKHGKKQLDPL	1.08	0.24	cDNA FLJ43242 fis, clone HEART1000074, highly similar to Homo sapiens BTG3 associated nuclear protein (BANP), transcript variant 2, mRNA (247); cDNA, FLJ96046, Homo sapiens BTG3 associated nuclear protein (BANP), transcriptvariant 2, mRNA (247); cDNA FLJ10177 fis, clone HEMBA1004097, highly similar to Homo sapiens BTG3 associated nuclear protein (BANP), transcript variant 1, mRNA (243); cDNA FLJ5…
KGEEGEKAATAEG	0.9	0.15	Putative uncharacterized protein EMID2 (353); Collagen alpha-1(XXVI) chain (355)
LQDYRKKLLEHKE	1.41	0.22	26S protease regulatory subunit S10B (15)
RYAPVAKDLASRD	1.48	0.36	cDNA FLJ37560 fis, clone BRCOC2000333, highly similar to Succinate dehydrogenase (ubiquinone) flavoprotein subunit, mitochondrial (EC 1.3.5.1) (110); cDNA FLJ55072, highly similar to Succinate dehydrogenase (ubiquinone) flavoprotein subunit, mitochondrial (EC1.3.5.1) (287); cDNA FLJ61478, highly similar to Succinate dehydrogenase (ubiquinone) flavoprotein subunit, mitochondrial (EC 1.3.5.1) (335)…
FVFQKDKGQKSPA	1.83	0.48	cDNA FLJ59171, highly similar to Ran-binding protein 3 (23); RAN binding protein 3 isoform RANBP3-a variant (23); Ran-binding protein 3 (23)
VKQEFEKQDELKR	1.66	0.18	cDNA FLJ77762, highly similar to Homo sapiens cullin-associated and neddylation-dissociated 1 (CAND1), mRNA (1168); cDNA FLJ10929 fis, clone OVARC1000479, highly similar to Cullin-associated NEDD8-dissociated protein 1 (396); Cullin-associated NEDD8-dissociated protein 1 (1168); Cullin-associated NEDD8-dissociated protein 2 (1173)
MTSAPSKDQVQLK	1.2	0.21	Protein strawberry notch homolog 1 (149)
ISVTPVKNIDPVK	1.3	0.26	cDNA FLJ11695 fis, clone HEMBA1005019, highly similar to Homo sapiens SCC-112 protein (SCC-112), mRNA (207); Sister chromatid cohesion protein PDS5 homolog A (1211); PDS5A protein (252)
VTSWPGKQVETLR	1.1	0.14	Vascular endothelial zinc finger 1 (357)
ELKQQQKLDRQKE	1.04	0.21	cDNA FLJ57535, highly similar to Guanine nucleotide-binding protein-like 3 (79); Putative uncharacterized protein GNL3 (67); Guanine nucleotide-binding protein-like 3 (79)
IEKLSGKEINGRK	1.32	0.23	Putative uncharacterized protein SFRS5 (161); CS0DF038YO05 variant (221); Splicing factor, arginine/serine-rich 5, isoform CRA_c (40); Splicing factor, arginine/serine-rich 5 (167)
IINPDKKKSKKSS	1.46	0.38	cDNA FLJ59851, highly similar to DNA methyltransferase 1-associated protein 1 (36); cDNA FLJ54124, highly similar to DNA methyltransferase 1-associated protein 1 (36); cDNA FLJ59979, highly similar to DNA methyltransferase 1-associated protein 1 (36); cDNA FLJ59982, highly similar to DNA methyltransferase 1-associated protein 1 (36); cDNA FLJ59984, moderately similar to DNA methyltransferase 1-as…
TNPNASKFAQKIG	1.04	0.17	cDNA FLJ77815, highly similar to Homo sapiens cysteine and glycine-rich protein 1 (CSRP1), mRNA (108); cDNA FLJ16406 fis, clone UTERU2026142, highly similar to Cysteine and glycine-rich protein 1 (85); cDNA FLJ61189, highly similar to Cysteine and glycine-rich protein 1 (108); cDNA FLJ54121, highly similar to Cysteine and glycine-rich protein 1 (108); Cysteine and glycine-rich protein 1 (108); Cy…
HQEEKRKVEEKRR	1.37	0.23	Putative uncharacterized protein SEPT8 (381); Putative uncharacterized protein SEPT8 (383); SEPT8 protein (381); Putative uncharacterized protein SEPT8 (387); Septin-8 (383)
LVEEDDKDKAKRV	1.08	0.12	Putative uncharacterized protein CLOCK (31); Circadian locomoter output cycles protein kaput (31); CLOCK protein (31); Clock variant (31)
NKLENGKPLSMSE	1.02	0.2	Zinc finger E-box binding homeobox 2 (376); cDNA FLJ55880, highly similar to Zinc finger homeobox protein 1b (353); Putative uncharacterized protein ZFHX1B (242); Smad interacting-protein 1 (377); Zinc finger E-box-binding homeobox 2 (377)
YDSNTGKLIRTGA	1.43	0.3	Putative uncharacterized protein CTDP1 (780); RNA polymerase II subunit A C-terminal domain phosphatase (780)
KMAVWAKKMTEIQ	1.51	0.23	cDNA FLJ16648 fis, clone TESTI4035508, highly similar to Structural maintenance of chromosomes 4-like 1 protein (274); cDNA FLJ46264 fis, clone TESTI4026080, highly similar to Structural maintenance of chromosomes 4-like 1 protein (654); Structural maintenance of chromosomes protein 4 (679)
TNKKTGKPMINLY	1.35	0.21	cDNA FLJ53422, highly similar to TATA-binding protein-associated factor 2N (71); cDNA, FLJ94920, Homo sapiens TAF15 RNA polymerase II, TATA box binding protein(TBP)-associated factor, 68kDa (TAF15), transcript variant 1, mRNA (268); TATA-binding protein-associated factor 2N (268)
ZZZMGRKKIQIQR	1.37	0.53	Myocyte-specific enhancer factor 2D (7); MEF2D protein (7); MEF2D variant protein (12); Myocyte enhancer factor 2D/deleted in azoospermia associated protein 1 fusion protein (7); Myocyte enhancer factor 2D (7)
DRSFVGKQFSAND	0.61	0.21	cDNA FLJ50439, highly similar to Phosphoglucomutase-1 (EC 5.4.2.2) (260); cDNA FLJ51818, highly similar to Phosphoglucomutase-1 (EC 5.4.2.2) (433); cDNA FLJ50606, highly similar to Phosphoglucomutase-1 (EC 5.4.2.2) (260); cDNA FLJ50663, highly similar to Phosphoglucomutase-1 (EC 5.4.2.2) (475); Phosphoglucomutase-1 (457)
PKKGSKKAINKAQ	0.64	0.23	Histone H2B type 1-M (17)
PEDLEVKEVTKNT	0.72	0.1	Titin (104); Titin (16726); Titin (17653)
TVGKSSKMLQHID	0.72	0.14	Putative uncharacterized protein SNRPB (8); cDNA FLJ41124 fis, clone BRACE2014850, highly similar to Small nuclear ribonucleoprotein-associated protein N (12); Small nuclear ribonucleoprotein polypeptides B and B1, isoform CRA_c (8); SNRPB protein (8); Small nuclear ribonucleoprotein polypeptide N variant (8); Small nuclear ribonucleoprotein polypeptide B (8); cDNA, FLJ93004, Homo sapiens small n…
DIDEDFKRELRNL	1.02	0.39	Atlastin-2 (321); Putative uncharacterized protein ATL2 (150); cDNA FLJ53876, highly similar to Homo sapiens ADP-ribosylation factor-like 6 interacting protein 2 (ARL6IP2), mRNA (303); cDNA FLJ57300, highly similar to Homo sapiens ADP-ribosylation factor-like 6 interacting protein 2 (ARL6IP2), mRNA (150); cDNA FLJ51152, highly similar to Homo sapiens ADP-ribosylation factor-like 6 interacting pro…
RSVETLKEMIKSG	1.02	0.14	Pyruvate kinase (62); Pyruvate kinase isozymes M1/M2 (62)
TNLRLPKKVFEAA	1	0.13	cDNA FLJ90568 fis, clone OVARC1001570, highly similar to Beta-secretase 1 (EC 3.4.23.46) (225); cDNA FLJ54690, highly similar to Beta-secretase 1 (EC 3.4.23.46) (174); Beta-site APP-cleaving enzyme 1, isoform CRA_f (199); Beta-secretase 1 (299); KIAA1149 splice variant 1 (194); Beta-site APP-cleaving enzyme 1 (299); HSPC104 (62)
LELEKQKLQEEQE	0.48	0.11	Putative uncharacterized protein FAM107B (100); Protein FAM107B (100)
LLEGDEKEYNADG	0.67	0.12	ERBB4 protein (863); Receptor tyrosine-protein kinase erbB-4 (873); Putative uncharacterized protein ERBB4 (44)
EQEKIDKLMIEMD	0.34	0.09	Enolase (59); Alpha-enolase (92)
RQLEEEKNSLQEQ	0.47	0.19	MYH10 protein (1354); Myosin-10 (1345); Myosin, heavy chain 10, non-muscle (1345); MYH10 variant protein (1387)
DSKLNYKPPPQKS	0.53	0.1	cDNA, FLJ92068, highly similar to Homo sapiens Rho GDP dissociation inhibitor (GDI) beta (ARHGDIB),mRNA (25); Rho GDP-dissociation inhibitor 2 (25)
PVQQIMKFKSLDD	0.46	0.13	Retinal dehydrogenase 1 (410); cDNA FLJ51786, highly similar to Retinal dehydrogenase 1 (EC 1.2.1.36) (331); cDNA FLJ50286, highly similar to Retinal dehydrogenase 1 (EC 1.2.1.36) (335)
ENLTLGKKAELQH	0.81	0.14	Putative uncharacterized protein POM121L2 (67)
KIIDVVKTGIEQG	0.66	0.08	cDNA FLJ53969, highly similar to Trifunctional enzyme subunit alpha, mitochondrial (119); cDNA FLJ54509, highly similar to Trifunctional enzyme subunit alpha, mitochondrial (263); cDNA FLJ52806, highly similar to Trifunctional enzyme subunit alpha, mitochondrial (222); Trifunctional enzyme subunit alpha, mitochondrial (309); Putative uncharacterized protein HADHA (83)
PEPAVFKATLDRS	0.73	0.09	cDNA FLJ57870, highly similar to Thiosulfate sulfurtransferase (EC 2.8.1.1) (154); Thiosulfate sulfurtransferase variant (154); Thiosulfate sulfurtransferase (154)
DGVATEKAVELAA	1.05	0.13	cDNA FLJ32530 fis, clone SMINT2000185, highly similar to TRANSKETOLASE (EC 2.2.1.1) (191); cDNA FLJ36348 fis, clone THYMU2007025, highly similar to TRANSKETOLASE (EC 2.2.1.1) (373); cDNA FLJ54957, highly similar to Transketolase (EC 2.2.1.1) (464); cDNA FLJ53217, highly similar to Transketolase (EC 2.2.1.1) (258); cDNA FLJ56274, highly similar to Transketolase (EC 2.2.1.1) (409); Transketolase va…
GLSTGEKEKLPGE	0.89	0.28	cDNA FLJ76297, highly similar to Homo sapiens eukaryotic translation initiation factor 3, subunit 4 delta, 44kDa (EIF3S4), mRNA (193); Eukaryotic translation initiation factor 3 subunit G (193); EIF3S4 protein (193)
PPASTCKVLVESK	0.45	0.09	SAC3 domain-containing protein 1 (372)
AQSLIDKTTAAFQ	0.75	0.11	Small nuclear ribonucleoprotein polypeptide C variant (52); Small nuclear ribonucleoprotein polypeptide C (11); Small nuclear ribonucleoprotein polypeptide C (73); cDNA, FLJ92223, Homo sapiens small nuclear ribonucleoprotein polypeptide C (SNRPC),mRNA (52); U1 small nuclear ribonucleoprotein C (52)
FEGANFKGNTIEI	0.76	0.1	Beta-crystallin B1 (160)
EHPDDGKHPDGGL	1.04	0.11	Lymphoid enhancer-binding factor 1, isoform CRA_c (95); cDNA FLJ58716, highly similar to Lymphoid enhancer-binding factor 1 (27); Lymphoid enhancer-binding factor 1 (95); Lymphoid enhancer-binding factor 1, isoform CRA_d (95)
QPHLQTKEEQRKK	0.85	0.19	cDNA FLJ78441, highly similar to Homo sapiens nucleolar and spindle associated protein 1 (NUSAP1),mRNA (411); cDNA FLJ54110, highly similar to Homo sapiens nucleolar and spindle associated protein 1 (NUSAP1), transcript variant 2, mRNA (348); Nucleolar and spindle-associated protein 1 (411)
QHSWFRKKHPPAE	0.75	0.18	Polarization-related protein LKB1 (311); Putative uncharacterized protein (311); Serine/threonine-protein kinase 11 (311)
SNEHLQKHVEDLL	0.95	0.11	TPR protein (36); Tpr protein (252); TPR protein (252); Tpr (252); Nucleoprotein TPR (252)
EDKYGNKYYEDNK	0.82	0.1	NADH dehydrogenase [ubiquinone] 1 alpha subcomplex subunit 12 (47)
REEHKKKHPDSSV	0.89	0.14	High mobility group protein B2 (30); High-mobility group box 2 (30)
GKEHMEKYGTKIE	0.9	0.14	cDNA, FLJ93299, highly similar to Homo sapiens sterol carrier protein 2 (SCP2), mRNA (173); cDNA FLJ53982, highly similar to Nonspecific lipid-transfer protein (EC 2.3.1.176) (149); cDNA FLJ53991, highly similar to Nonspecific lipid-transfer protein (EC 2.3.1.176) (92); Putative uncharacterized protein SCP2 (129); Non-specific lipid-transfer protein (173); Sterol carrier protein X isoform 1 propr…
LASYLDKVRALEE	0.75	0.12	Putative uncharacterized protein KRT17P1 (102); cDNA FLJ61294, highly similar to Keratin, type I cytoskeletal 17 (102); cDNA FLJ56791, highly similar to Keratin, type I cytoskeletal 16 (14); cDNA FLJ58872, highly similar to Keratin, type I cytoskeletal 15 (122); cDNA FLJ53570, highly similar to Keratin, type I cytoskeletal 16 (14); cDNA FLJ56708, highly similar to Keratin, type I cytoskeletal 17 …
DGPSTEKDLDEKK	0.82	0.14	cDNA FLJ51911, highly similar to Transcription elongation factor A protein 1 (63); Transcription elongation factor A protein 1 (84)
KFGAPQKDVKHLA	0.74	0.12	cDNA FLJ53969, highly similar to Trifunctional enzyme subunit alpha, mitochondrial (169); cDNA FLJ54509, highly similar to Trifunctional enzyme subunit alpha, mitochondrial (313); Trifunctional enzyme subunit alpha, mitochondrial (359); Putative uncharacterized protein HADHA (133)
RSKHMPKSTIETA	0.74	0.14	Coiled-coil domain containing 44, isoform CRA_a (119); Translational activator of cytochrome c oxidase 1 (119)
EKELHEKFDRLKK	0.94	0.18	Septin 6, isoform CRA_b (367); cDNA FLJ59732, highly similar to Septin-6 (361); cDNA FLJ59646, highly similar to Septin-6 (309); Septin 6, isoform CRA_d (367); Septin 6, isoform CRA_e (367); Septin 6 isoform E (367); Septin 6 (367); MLL/SEPTIN6 fusion protein (499); Septin-6 (367)
VSQINHKLEAQLV	0.88	0.26	Golgi-associated PDZ and coiled-coil motif-containing protein (93)
LTLARDKHLEFSS	1.25	0.12	Histone acetyltransferase p300 (1637)
LEHLQSKYIGTGH	1.1	0.1	Splicing factor 3B subunit 5 (17)
YSQKEDKYEEEIK	1.11	0.08	cDNA, FLJ96568, highly similar to Homo sapiens tropomyosin 3 (TPM3), mRNA (184); cDNA FLJ50612, highly similar to Rattus norvegicus tropomyosin 3, gamma (Tpm3), transcript variant 2, mRNA (118); cDNA FLJ50720, highly similar to Homo sapiens tropomyosin 3 (TPM3), transcript variant 2, mRNA (139); Putative uncharacterized protein ENSP00000308847 (156); Putative uncharacterized protein DKFZp686J1372…
EEKERIKYEEDKR	0.82	0.09	cDNA FLJ56379, highly similar to Mus musculus nexilin (Nexn), mRNA (139); cDNA FLJ56909, highly similar to Rattus norvegicus nexilin (Nexn), transcript variant s, mRNA (189); Putative uncharacterized protein NEXN (103); Nexilin (203); MSTP128 (139)
IKYIKDKYPNLQV	0.97	0.08	cDNA FLJ61601, highly similar to Inosine-5'-monophosphate dehydrogenase 2 (EC 1.1.1.205) (293); Inosine-5'-monophosphate dehydrogenase 2 (293)
DAMLIEKFVDTPR	1.06	0.09	cDNA FLJ54709, highly similar to Methylcrotonoyl-CoA carboxylase subunit alpha, mitochondrial (EC 6.4.1.4) (113); cDNA FLJ53328, highly similar to Methylcrotonoyl-CoA carboxylase subunit alpha, mitochondrial (EC 6.4.1.4) (201); cDNA, FLJ79327, highly similar to Methylcrotonoyl-CoA carboxylase subunit alpha, mitochondrial (EC 6.4.1.4) (139); Methylcrotonoyl-CoA carboxylase subunit alpha, mitochond…
EAEKALKHMDGGQ	0.94	0.09	Putative uncharacterized protein RNPS1 (183); RNA-binding protein with serine-rich domain 1 (221)
LPACLNKEESKTC	1.02	0.09	UPF0557 protein C10orf119 (328)
VTQHDSKKAGAEV	0.66	0.16	Tyrosyl-tRNA synthetase, cytoplasmic (146)
FKVAPSKWEAVDE	0.71	0.12	Putative uncharacterized protein ENSP00000418220 (80); Putative uncharacterized protein ENSP00000417441 (327); U2-associated protein SR140 (760)
PTVTQVKAEKQED	0.64	0.11	TCOF1 protein (755); cDNA FLJ58017, moderately similar to Treacle protein (352); cDNA FLJ57828, highly similar to Treacle protein (264); cDNA FLJ57346, highly similar to Homo sapiens Treacher Collins-Franceschetti syndrome 1 (TCOF1), transcript variant 1, mRNA (755); TCOF1 protein variant (355); Treacle protein (755)
IALKARKSAIEQD	0.74	0.12	Putative uncharacterized protein RAPGEF5 (111); Putative uncharacterized protein DKFZp667A016 (111)
QFDDNLKFKNIIN	0.68	0.11	Putative uncharacterized protein RSF1 (43); Putative uncharacterized protein RSF1 (95); RSF1 protein (136); Remodeling and spacing factor 1 (136)
EKHEWEKILQKVL	0.72	0.27	Zinc finger ZZ-type and EF-hand domain-containing protein 1 (2667)
GEAKTFKGVVDVV	0.77	0.25	Ribosome-releasing factor 2, mitochondrial (233)
TLKLLCKNFGAEN	0.61	0.09	HEATR1 protein (1037); HEAT repeat containing 1 (1679); cDNA FLJ43675 fis, clone SYNOV4008440, highly similar to HEAT repeat-containing protein 1 (764); cDNA FLJ53502, highly similar to HEAT repeat-containing protein 1 (661); cDNA, FLJ79312, highly similar to HEAT repeat-containing protein 1 (661); HEAT repeat-containing protein 1 (1679); HEAT repeat containing 1 (1598); cDNA FLJ40893 fis, clone …
AASKCRKRKLERI	0.63	0.17	Transcription factor AP-1 (271); Transcription factor jun-D (287); JUN protein (271)
ERAALAKALKMTD	0.74	0.11	TLX1 protein (236); T-cell leukemia homeobox protein 1 (236)
CFHQLMKDTTLNW	0.72	0.07	LOC727761 protein (145); Putative uncharacterized protein DTYMK (127); Putative uncharacterized protein DTYMK (165); Thymidylate kinase (169); Deoxythymidylate kinase (Thymidylate kinase) variant (169); Putative uncharacterized protein tmp_locus_5 (169)
DDELDSKLNYKPP	0.57	0.11	cDNA, FLJ92068, highly similar to Homo sapiens Rho GDP dissociation inhibitor (GDI) beta (ARHGDIB),mRNA (21); Rho GDP-dissociation inhibitor 2 (21)
IENVKAKIQDKEG	0.75	0.12	cDNA FLJ75516, highly similar to Xenopus tropicalis ubiquitin C, mRNA (29); cDNA, FLJ96793, Homo sapiens ribosomal protein S27a (RPS27A), mRNA (29); cDNA FLJ51326, highly similar to Homo sapiens ubiquitin B (UBB), mRNA (29); cDNA, FLJ95576, Homo sapiens ubiquitin A-52 residue ribosomal protein fusionproduct 1 (UBA52), mRNA (29); RPS27A protein (29); Ubiquitin C variant (45); Ubiquitin C splice va…
LDPNIHKLQDLRD	0.81	0.13	Putative uncharacterized protein TRANK1 (637); Putative uncharacterized protein TRANK1 (1180); Lupus brain antigen 1 homolog (1187)
TRFAHLKKSKESE	0.77	0.13	Putative uncharacterized protein KIAA0922 (569); Transmembrane protein 131-like (569)
LTHSGKKPYVSKQ	0.98	0.16	Putative uncharacterized protein ENSP00000384896 (214); Zinc finger protein 705A (142); Zinc finger protein 705C (142); Putative zinc finger protein 705G (142); Putative zinc finger protein 705H (144)
RWPDLHKNELKHV	0.92	0.18	cDNA FLJ59261, highly similar to Mothers against decapentaplegic homolog 4 (SMAD4) (106); SMAD4 (106); Mothers against decapentaplegic homolog 4 (106)
VLGAVNKPLSATG	1.04	0.16	cDNA FLJ11695 fis, clone HEMBA1005019, highly similar to Homo sapiens SCC-112 protein (SCC-112), mRNA (142); Sister chromatid cohesion protein PDS5 homolog A (1146); PDS5A protein (187)
DEVLTSKGDAWAK	0.88	0.16	cDNA, FLJ96865 (146); Uncharacterized protein C19orf43 (146)
IETDKPKVAPAPA	0.78	0.28	cDNA, FLJ92603, Homo sapiens archain 1 (ARCN1), mRNA (211); Coatomer subunit delta variant 2 (252); cDNA FLJ51620, highly similar to Coatomer subunit delta (123); Coatomer subunit delta (211); Putative uncharacterized protein DKFZp686M09245 (252)
QYKDVAKPVIELY	0.83	0.13	Adenylate kinase isoenzyme 4, mitochondrial (179)
EIFQHSKYKVDFI	0.79	0.09	Putative uncharacterized protein MRPL39 (224); Putative uncharacterized protein MRPL39 (234); 39S ribosomal protein L39, mitochondrial (234)
RFTSYQKATEEHS	0.94	0.12	Bcl-2-associated transcription factor 1 (637); BCLAF1 protein (637)
RPDQLDKVEQYRR	0.89	0.12	Putative uncharacterized protein EXOC3 (38); Exocyst complex component 3 (39); Exocyst complex component 3, isoform CRA_a (28)
IERTDFKEEPEPG	1.02	0.13	cDNA FLJ75085, highly similar to Homo sapiens glutaminyl-tRNA synthetase (QARS), mRNA (620); cDNA FLJ54487, highly similar to Glutaminyl-tRNA synthetase (EC 6.1.1.18) (475); cDNA FLJ54453, highly similar to Glutaminyl-tRNA synthetase (EC 6.1.1.18) (570); cDNA FLJ54314, highly similar to Glutaminyl-tRNA synthetase (EC 6.1.1.18) (609); Putative uncharacterized protein QARS (140); Glutaminyl-tRNA sy…
NRSVYFKPSLTPS	1.01	0.11	cDNA FLJ60565, highly similar to Nuclear pore complex protein Nup153 (384); Nuclear pore complex protein Nup153 (384); NUP153 variant protein (406)
KLQELEKYPGIQT	0.96	0.13	cDNA FLJ76235, highly similar to Homo sapiens dehydrogenase/reductase (SDR family) member 6 (DHRS6),mRNA (48); cDNA FLJ78346, highly similar to Homo sapiens 3-hydroxybutyrate dehydrogenase, type 2, mRNA (48); cDNA FLJ46606 fis, clone THYMU3047891, highly similar to Dehydrogenase/reductase SDR family member 6 (EC 1.1.-.-) (48); 3-hydroxybutyrate dehydrogenase type 2 (48)
YGSQGYKYNWKLD	0.85	0.08	cDNA FLJ50378, highly similar to Phenylalanyl-tRNA synthetase alpha chain (EC 6.1.1.20) (280); Phenylalanine-tRNA synthetase-like, alpha subunit, isoform CRA_b (311); Phenylalanyl-tRNA synthetase alpha chain (311)
YIPLVKKHCDDSF	1	0.16	Coproporphyrinogen-III oxidase, mitochondrial (371)
EKTISAKYAEERD	1.1	0.11	Myosin-9 (1459); Non-muscle myosin heavy chain (11); Myosin, heavy polypeptide 9, non-muscle, isoform CRA_a (1459)
LIKELAKYEYMEE	1.02	0.12	Putative uncharacterized protein SAT1 (26); Putative uncharacterized protein SAT1 (50); Spermidine/spermine N1-acetyltransferase alpha variant (26); cDNA, FLJ92448, Homo sapiens spermidine/spermine N1-acetyltransferase (SAT), mRNA (26); DC21 (51); Diamine acetyltransferase 1 (26)
IYMGKDKYENEDL	0.87	0.14	cDNA, FLJ78914, moderately similar to Coiled-coil domain-containing protein 25 (23); Coiled-coil domain-containing protein 25 (23); CCDC25 protein (23)
VEAIFSKYGKIVG	0.83	0.08	cDNA FLJ75154, highly similar to Homo sapiens heterogeneous nuclear ribonucleoprotein C (C1/C2), mRNA (39); cDNA, FLJ92657, highly similar to Homo sapiens heterogeneous nuclear ribonucleoprotein C (C1/C2) (HNRPC), transcript variant 2, mRNA (39); cDNA, FLJ92712, highly similar to Homo sapiens heterogeneous nuclear ribonucleoprotein C (C1/C2) (HNRPC), transcript variant 1, mRNA (39); cDNA FLJ45003…
KKFNALKVPVPED	0.96	0.12	ATP5H protein (78); ATP synthase subunit d, mitochondrial (78)
RTIPTDKHVDLLI	1.04	0.13	cDNA, FLJ93299, highly similar to Homo sapiens sterol carrier protein 2 (SCP2), mRNA (142); cDNA FLJ53982, highly similar to Nonspecific lipid-transfer protein (EC 2.3.1.176) (118); cDNA FLJ53991, highly similar to Nonspecific lipid-transfer protein (EC 2.3.1.176) (61); Putative uncharacterized protein SCP2 (98); Non-specific lipid-transfer protein (142); Sterol carrier protein X isoform 1 propro…
LNEEIGKLLAKAE	0.93	0.17	Putative uncharacterized protein LUC7L (82); LUC7-like (S. cerevisiae) (49); Putative RNA-binding protein Luc7-like 1 (135); LUC7-like isoform b variant (135)
NSRWCDKSDEDDW	1.01	0.14	HCG19318, isoform CRA_a (130); cDNA FLJ60675, highly similar to ATP-dependent RNA helicase DDX3X (EC 3.6.1.-) (130); cDNA FLJ52848, highly similar to ATP-dependent RNA helicase DDX3X (EC 3.6.1.-) (174); cDNA FLJ60399, highly similar to ATP-dependent RNA helicase DDX3X (EC 3.6.1.-) (114); ATP-dependent RNA helicase DDX3X (130); DEAD/H (Asp-Glu-Ala-Asp/His) box polypeptide 3 variant (142)
LNVTEEKYQEALA	0.7	0.06	Superoxide dismutase (22); Superoxide dismutase (68); Superoxide dismutase (67); Superoxide dismutase 2, mitochondrial (89); Manganese superoxide dismutase (68); Superoxide dismutase (64); SOD2 protein (68); Putative uncharacterized protein DKFZp564M2422 (68); Superoxide dismutase [Mn], mitochondrial (68)
SKEREEKVKETQE	0.64	0.09	cDNA FLJ58484, highly similar to Band 4.1-like protein 2 (176); Band 4.1-like protein 2 (176); EPB41L2 protein variant (179); Putative uncharacterized protein DKFZp781H1755 (176)
IWFDKFKYDDAER	0.85	0.12	cDNA, FLJ95068, highly similar to Homo sapiens eukaryotic translation elongation factor 1 delta (guanine nucleotide exchange protein) (EEF1D), transcript variant 1, mRNA (383); cDNA FLJ57946, highly similar to Elongation factor 1-delta (17); Elongation factor 1-delta (17); Eukaryotic translation elongation factor 1 delta (Guanine nucleotide exchange protein), isoform CRA_a (17); FP1047 (383); EEF…
KEGEYIKLKVIGQ	0.79	0.14	Putative uncharacterized protein SUMO1 (23); Small ubiquitin-related modifier 1 (23)
KVVINNKLEQRII	1.02	0.19	ATP-dependent RNA helicase DHX29 (93)
MPDGQFKDISLSD	1.05	0.22	Peroxiredoxin-1 (27)
TSLVFGKKADNEE	1.19	0.32	cDNA FLJ60565, highly similar to Nuclear pore complex protein Nup153 (1151); Nuclear pore complex protein Nup153 (1120); NUP153 variant protein (1100); Nucleoporin 153kDa (1120)
ZZZZADKPDMGEI	1.5	0.48	cDNA, FLJ92220, Homo sapiens thymosin, beta 10 (TMSB10), mRNA (8); Thymosin beta-10 (8)
AAKPWTKDHHYFK	1.29	0.34	COP9 signalosome complex subunit 5 (47)
NDQKKTKVKKKTS	1.35	0.35	cDNA FLJ76675, highly similar to Homo sapiens RAS p21 protein activator 2 (RASA2), mRNA (211); Ras GTPase-activating protein 2 (211)
MVGMGQKDSYVGD	1.47	0.21	Beta-actin (40); Putative uncharacterized protein ACTA1 (52); cDNA FLJ78096, highly similar to Homo sapiens actin, alpha, cardiac muscle (ACTC), mRNA (52); Actin, aortic smooth muscle (52); Actin, cytoplasmic 1 (50); Actin, alpha cardiac muscle 1 (52); Actin, cytoplasmic 2 (50); Actin, gamma-enteric smooth muscle (51); Actin, alpha skeletal muscle (52); cDNA FLJ39583 fis, clone SKMUS2004897, high…
VVMHLKKQDLKET	1.52	0.34	cDNA FLJ53983, highly similar to IWS1 homolog (510); Putative uncharacterized protein IWS1 (275); Putative uncharacterized protein IWS1 (393); Protein IWS1 homolog (600)
LVKLADKLYNLRD	0.97	0.19	HD domain-containing protein 3 (123)
SRNYGWKVEETVK	1.19	0.23	cDNA, FLJ92557, highly similar to Homo sapiens thioredoxin reductase 1 (TXNRD1), mRNA (89); cDNA FLJ59466, highly similar to Thioredoxin reductase 1, cytoplasmic (EC 1.8.1.9) (51); cDNA FLJ56075, highly similar to Thioredoxin reductase 1, cytoplasmic (EC 1.8.1.9) (139); cDNA FLJ59560, highly similar to Thioredoxin reductase 1, cytoplasmic (EC 1.8.1.9) (51); Thioredoxin reductase 1 (239); cDNA FLJ…
IFNYKGKNVLINK	1.2	0.5	cDNA FLJ53009, highly similar to Calreticulin (137); cDNA FLJ58668, highly similar to Calreticulin (32); Calreticulin (153); Calreticulin variant (142)
KEKEKKKDGEKEE	1.25	0.25	SEC62 protein (143); Translocation protein SEC62 (143)
LLEPYNKYRFLSN	0.95	0.12	cDNA FLJ77145, highly similar to Homo sapiens myosin, heavy polypeptide 9, non-muscle (MYH9), mRNA (299); cDNA FLJ57040, highly similar to Myosin-9 (299); Myosin-9 (299); Myosin, heavy polypeptide 9, non-muscle, isoform CRA_a (299); MYH9 protein (299)
APELLAKYCDNLL	1.06	0.17	cDNA FLJ50125, highly similar to Cullin-2 (330); cDNA FLJ56037, highly similar to Cullin-2 (412); Cullin-2 (393); Cullin 2 (393); Cullin 2 (336)
VEDFKNKYEDEIN	1.87	0.32	cDNA FLJ78504, highly similar to Homo sapiens keratin 6A (KRT6A), mRNA (252); cDNA FLJ77754, highly similar to Homo sapiens keratin 8 (KRT8), mRNA (178); cDNA FLJ59922, highly similar to Keratin, type II cytoskeletal 5 (11); cDNA FLJ53910, highly similar to Keratin, type II cytoskeletal 6A (223); cDNA FLJ54657, highly similar to Keratin, type II cytoskeletal 6A (237); cDNA FLJ51361, highly simila…
YTCNECKHHVETR	1.42	0.43	CREBBP (22); CREB-binding protein (1711); Histone acetyltransferase p300 (1674); CBP (192); CREBBP variant protein (1741)
EVKMEAKMEVDQP	1.22	0.4	Histone acetyltransferase p300 (981); EP300 protein (981)
QAIHQLKVNGEDP	1.39	0.27	Lysyl-tRNA synthetase (88)
PTDYWKKMAKVLR	1.29	0.22	cDNA FLJ36374 fis, clone THYMU2008185, highly similar to Xaa-Pro aminopeptidase 1 (EC 3.4.11.9) (60); cDNA FLJ58474, highly similar to Xaa-Pro aminopeptidase 1 (EC 3.4.11.9) (174); X-prolyl aminopeptidase (Aminopeptidase P) 1, soluble (131); X-prolyl aminopeptidase (Aminopeptidase P) 1, soluble (60); Xaa-Pro aminopeptidase 1 (131)
AFYAPQKKFGPVV	1.15	0.3	Putative uncharacterized protein ZYX (24); Zyxin (24)
LVNNGEKLEFLHK	1.3	0.19	cDNA FLJ78677, highly similar to Homo sapiens splicing factor 3b, subunit 3, 130kDa (SF3B3), mRNA (936); cDNA FLJ10435 fis, clone NT2RP1000493, highly similar to Splicing factor 3B subunit 3 (222); cDNA FLJ90452 fis, clone NT2RP3001475, highly similar to Splicing factor 3B subunit 3 (616); Splicing factor 3B subunit 3 (936)
NKVIPAKSPPPPT	1.1	0.17	Myocyte-specific enhancer factor 2D (250); MEF2D variant protein (255); DAZAP1/MEF2D fusion protein (183); Myocyte enhancer factor 2D (249)
RRLCEHKYGNAPR	1.06	0.14	Putative uncharacterized protein BCKDK (245); [3-methyl-2-oxobutanoate dehydrogenase [lipoamide]] kinase, mitochondrial (245); Branched chain ketoacid dehydrogenase kinase, isoform CRA_a (245)
VARSPDKPGKGSY	1.07	0.15	cDNA, FLJ94394, Homo sapiens forkhead box A1 (FOXA1), mRNA (237); cDNA FLJ50362, highly similar to Hepatocyte nuclear factor 3-alpha (204); cDNA, FLJ79259, highly similar to Hepatocyte nuclear factor 3-alpha (204); Hepatocyte nuclear factor 3-alpha (238); Hepatocyte nuclear factor 3-gamma (184)
QVLFDSKAVQKIE	1.2	0.22	Folliculin-interacting protein 2 (67)
YQTNKAKHDELTY	1.28	0.23	Cystatin-B (91); cDNA, FLJ92415, Homo sapiens cystatin B (stefin B) (CSTB), mRNA (91)
PIDLSCKHRTEKS	1.03	0.15	Nuclear receptor-interacting protein 1 (446)
YEAANWKYKYGYE	0.87	0.12	cDNA, FLJ79122, highly similar to Proteasome subunit alpha type 6 (EC 3.4.25.1) (23); Proteasome (Prosome, macropain) subunit, alpha type, 6, isoform CRA_a (83); Proteasome subunit alpha type-6 (102)
SQPLASKQEKDGT	1.38	0.23	cDNA FLJ54188, moderately similar to High mobility group protein HMG-I/HMG-Y (15); Putative uncharacterized protein HMGA1 (15); High mobility group protein HMG-I/HMG-Y (15); High mobility group AT-hook 1 (15); HMGA1 protein (15)
TARAKRKYSEVDD	1.24	0.15	CTD small phosphatase-like protein 2 (26)
NMEKTLKGLNSES	1.31	0.2	cDNA FLJ75245, highly similar to Homo sapiens carbamoyl-phosphate synthetase 1, mitochondrial (CPS1), mRNA (892); Carbamoyl-phosphate synthase [ammonia], mitochondrial (892); Putative uncharacterized protein CPS1 (892); Carbamoyl-phosphate synthetase 1 variant (902); Carbamoylphosphate synthetase I (892)
PASVYTKRCSEAF	1.21	0.15	Carnitine O-palmitoyltransferase 2, mitochondrial (510); Carnitine O-palmitoyltransferase II, mitochondrial variant (429)
VPDVDIKEDQDTS	1.15	0.19	cDNA FLJ77253, highly similar to Homo sapiens nuclear receptor interacting protein 1 (NRIP1), mRNA (481); Nuclear receptor-interacting protein 1 (481)
KMAQELKYGDIVE	1.16	0.13	DNA-directed RNA polymerase (445); DNA-directed RNA polymerase (81); DNA-directed RNA polymerase III subunit RPC1 (445)
RLEKPAKYDDIKK	1.11	0.14	Glyceraldehyde-3-phosphate dehydrogenase (254); Glyceraldehyde-3-phosphate dehydrogenase (61)
TKKIKEKYIDQEE	1.05	0.12	cDNA FLJ53619, highly similar to Heat shock protein HSP 90-beta (265); cDNA FLJ54023, highly similar to Heat shock protein HSP 90-beta (237); Putative uncharacterized protein ENSP00000371882 (197); Putative heat shock protein HSP 90-beta 2 (197); Heat shock protein HSP 90-beta (275); HSP90AB1 protein (275)
LVSKIAKYPHVED	0.93	0.09	cDNA FLJ32659 fis, clone TESTI1000045, highly similar to Proteasome activator complex subunit 3 (134); Proteasome activator complex subunit 3 (195); PSME3 protein (195)
VILGEGKLDILKR	1.04	0.19	Putative uncharacterized protein CASP8 (156); Caspase 8 isoform C (156); Caspase 8 splice variant (156); Putative uncharacterized protein CASP8 (71); Putative uncharacterized protein CASP8 (53); Putative uncharacterized protein CASP8 (19); Putative uncharacterized protein CASP8 (59); Putative uncharacterized protein CASP8 (20); Caspase-8 (156); CASP8 protein (156)
EASGDYKYSGRDS	0.89	0.14	X-ray repair complementing defective repair in Chinese hamster cells 6 (Ku autoantigen, 70kDa) (31); X-ray repair complementing defective repair in Chinese hamster cells 6 (Ku autoantigen, 70kDa), isoform CRA_b (31); cDNA, FLJ96699, highly similar to Homo sapiens thyroid autoantigen 70kDa (Ku antigen) (G22P1), mRNA (31); ATP-dependent DNA helicase 2 subunit 1 (31)
KIWAFNKKVIDPV	0.93	0.18	cDNA FLJ56021, highly similar to Bifunctional aminoacyl-tRNA synthetase[Includes: Glutamyl-tRNA synthetase (EC 6.1.1.17) (522); Bifunctional aminoacyl-tRNA synthetase (497)
ADDFRVKYETELA	0.96	0.1	cDNA, FLJ94640, highly similar to Homo sapiens keratin 18 (KRT18), mRNA (167); Putative uncharacterized protein ENSP00000391831 (156); Putative uncharacterized protein ENSP00000396184 (161); Keratin, type I cytoskeletal 18 (167)
QTGALSKAIDRGT	1.14	0.12	ATP-binding cassette sub-family B member 7, mitochondrial (251); cDNA FLJ10556 fis, clone NT2RP2002479, highly similar to ATP-binding cassette sub-family B member 7, mitochondrial (252); cDNA FLJ53391, highly similar to ATP-binding cassette sub-family B member 7, mitochondrial (225)
VMEHFIKLYKKKT	1.11	0.15	cDNA FLJ60062, highly similar to 78 kDa glucose-regulated protein (268); 78 kDa glucose-regulated protein (268); HSPA5 protein (269)
GGVGRGKDISTIT	0.92	0.14	Putative uncharacterized protein RSF1 (1009); Remodeling and spacing factor 1 (1050)
KEEEEYKYTSCKA	0.9	0.11	Putative uncharacterized protein FNBP1 (64); Putative uncharacterized protein FNBP1 (66); FNBP1 protein (66); Formin-binding protein 1 (66); Formin binding protein 1 (27)
RRLDPNKYPVPEN	0.98	0.13	cDNA FLJ51365, highly similar to Flap endonuclease 1 (EC 3.1.-.-) (231); Flap endonuclease 1 (267); cDNA, FLJ93171, Homo sapiens flap structure-specific endonuclease 1 (FEN1), mRNA (267)
EKILADKEVKRPQ	1.18	0.18	Brefeldin A-inhibited guanine nucleotide-exchange protein 2 (22); ARFGEF2 protein (22)
TTRTNEKVELQEL	0.78	0.17	Mutant desmin (109); cDNA FLJ61414, highly similar to Desmin (109); Desmin (109); Putative uncharacterized protein tmp_locus_29 (109)
KIPNEHKKPAEVF	0.88	0.18	cDNA FLJ75393, highly similar to Homo sapiens PHD finger protein 16 (PHF16), mRNA (38); Protein Jade-3 (38)
KDLDFEKAKPRMD	0.98	0.15	Putative uncharacterized protein EIF4G3 (943); EIF4G1 protein (957); cDNA FLJ56479, highly similar to Eukaryotic translation initiation factor 4 gamma 1 (917); cDNA FLJ59298, highly similar to Eukaryotic translation initiation factor 4 gamma 3 (548); cDNA FLJ56483, highly similar to Eukaryotic translation initiation factor 4 gamma 1 (863); cDNA FLJ53944, highly similar to Eukaryotic translation i…
LELSASKKKZZZZ	0.83	0.12	Putative uncharacterized protein ERC2 (527); ERC protein 2 (879)
KLAKAGKNQGDPK	1.08	0.19	Nucleolin (9); cDNA FLJ45706 fis, clone FEBRA2028457, highly similar to Nucleolin (9); NCL protein (9)
ZMATLEKLMKAFE	1.13	0.19	Huntingtin (7)
KIGVFSKDKFPGE	1.25	0.2	SUPT16H protein (139); FACT complex subunit SPT16 (139)
ZZZZMEKTELIQK	1.18	0.18	14-3-3 protein theta (7); cDNA FLJ52118, highly similar to 14-3-3 protein theta (7); 14-3-3 tau splice variant (7); Putative uncharacterized protein YWHAQ (7)
KDGPGGKEATWVV	0.99	0.16	cDNA, FLJ93299, highly similar to Homo sapiens sterol carrier protein 2 (SCP2), mRNA (470); cDNA FLJ53982, highly similar to Nonspecific lipid-transfer protein (EC 2.3.1.176) (446); cDNA FLJ53991, highly similar to Nonspecific lipid-transfer protein (EC 2.3.1.176) (389); cDNA FLJ58965, highly similar to Nonspecific lipid-transfer protein (EC 2.3.1.176) (66); Non-specific lipid-transfer protein (4…
EELGKAKPTTRPT	1.14	0.16	Fibroblast growth factor-binding protein 2 (176)
TLEEIQKHNHSKS	1.08	0.17	Cytochrome b5 (19); Cytochrome b-5 isoform 1 variant (40)
REFQRWKHHPSIR	0.85	0.13	Mutant electron-transferring flavoprotein dehydrogenase (344); cDNA FLJ59482, highly similar to Electron transfer flavoprotein-ubiquinone oxidoreductase, mitochondrial (EC 1.5.5.1) (283); cDNA FLJ52419, highly similar to Electron transfer flavoprotein-ubiquinone oxidoreductase, mitochondrial (EC 1.5.5.1) (297); Putative uncharacterized protein ETFDH (311); Electron transfer flavoprotein-ubiquinon…
LQGKVQKHQAFEA	0.95	0.09	Putative uncharacterized protein SPTAN1 (613); cDNA FLJ59116, highly similar to Spectrin alpha chain, brain (613); cDNA FLJ61399, highly similar to Spectrin alpha chain, brain (613); Spectrin alpha chain, brain (613)
LDEQYQKYKFMEL	0.77	0.09	cDNA FLJ59776, highly similar to Prefoldin subunit 3 (54); Prefoldin subunit 3 (59); Von Hippel-Lindau binding protein 1, isoform CRA_a (22)
LLYRWMKHEPGLG	0.9	0.11	Hypermethylated in cancer 1 protein (333)
RAAGIGKDFKENP	0.84	0.12	cDNA FLJ51417, highly similar to Serine/threonine-protein kinase PRP4 homolog (EC 2.7.11.1) (642); Serine/threonine-protein kinase PRP4 homolog (656)
SKTGEEKYVEESK	0.99	0.11	LETM1 and EF-hand domain-containing protein 1, mitochondrial (597)
VLEDGTKMKGYSF	0.99	0.1	cDNA FLJ75245, highly similar to Homo sapiens carbamoyl-phosphate synthetase 1, mitochondrial (CPS1), mRNA (55); Putative uncharacterized protein CPS1 (55); Carbamoyl-phosphate synthase [ammonia], mitochondrial (55); CPS1 protein (55); Carbamoyl-phosphate synthetase 1 variant (65); Carbamoylphosphate synthetase I (55)
GSEFVQKYLGEGP	1.07	0.13	cDNA, FLJ93682, Homo sapiens proteasome (prosome, macropain) 26S subunit, ATPase, 4(PSMC4), transcript variant 1, mRNA (238); 26S protease regulatory subunit 6B (238)
SSSIVDKYIGESA	1.02	0.12	26S protease regulatory subunit S10B (206)
GSGSGFKPFKGGP	0.97	0.2	cDNA FLJ78261 (593); Putative uncharacterized protein SLTM (590); SAFB-like transcription modulator (1024)
ZZZMSEKSVEAAA	0.91	0.18	Parathymosin (7)
DMMVLDKQKGLKS	1.04	0.21	IQ motif containing GTPase activating protein 3 (938); Ras GTPase-activating-like protein IQGAP3 (938)
RLEELMKPLKVVD	1.08	0.19	Splicing factor, arginine/serine-rich 8 (Suppressor-of-white-apricot homolog, Drosophila), isoform CRA_a (315); SFRS8 protein (315); SFRS8 protein variant (199); SFRS8 protein (252); Splicing factor, arginine/serine-rich 8 (315)
DVAHSVKEKFGKK	1.13	0.19	Glycogen [starch] synthase, liver (397)
TAMRITKWKEKVQ	1.08	0.18	cDNA, FLJ93754, highly similar to Homo sapiens tripartite motif-containing 38 (TRIM38), mRNA (167); Putative uncharacterized protein DKFZp686F23130 (167); Tripartite motif-containing protein 38 (167)
AKRKTNKGLAQYL	0.41	0.11	Putative uncharacterized protein TCEAL2 (116); Transcription elongation factor A protein-like 2 (144)
YMDPTGKTRRNKE	0.29	0.07	Putative uncharacterized protein NUDT5 (42)
AGKGLGKGGAKCH	0.22	0.11	Histone H4-like protein type G (13)
RPLIAKKNPKIPM	0.4	0.08	Putative uncharacterized protein CHD5 (175); Putative uncharacterized protein CHD3 (51); Chromodomain-helicase-DNA-binding protein 3 (176); Chromodomain-helicase-DNA-binding protein 5 (175); cDNA FLJ45103 fis, clone BRAWH3032571, moderately similar to Chromodomain helicase-DNA-binding protein 4 (175)
RLSLISKFRFNFL	0.58	0.2	cDNA FLJ59448, highly similar to Trifunctional enzyme subunit beta, mitochondrial (187); cDNA FLJ55769, highly similar to Trifunctional enzyme subunit beta, mitochondrial (196); cDNA FLJ56214, highly similar to Trifunctional enzyme subunit beta, mitochondrial (179); Trifunctional enzyme subunit beta, mitochondrial (201)
KGGKDKKQIQTSP	0.84	0.15	Serine/threonine-protein kinase LATS2 (571); LATS, large tumor suppressor, homolog 2 variant (577)
KQKEITKAIKRAQ	0.89	0.2	28S ribosomal protein S18c, mitochondrial (109)
NKPYSKKDYRSZZ	0.56	0.24	Putative uncharacterized protein KCNAB1 (397); cDNA FLJ77679, highly similar to Homo sapiens potassium voltage-gated channel, shaker-related subfamily, beta member 2 (KCNAB2), transcript variant 1, mRNA (363); cDNA, FLJ79460, highly similar to Voltage-gated potassium channel subunitbeta-2 (341); cDNA, FLJ79507, highly similar to Voltage-gated potassium channel subunitbeta-2 (296); cDNA, FLJ92727,…
LEDTTSKKKQKDR	0.78	0.2	Ubiquitin carboxyl-terminal hydrolase (86); Ubiquitin carboxyl-terminal hydrolase (88); Ubiquitin carboxyl-terminal hydrolase (23); cDNA FLJ54466, moderately similar to Rattus norvegicus ubiquitin specific protease 19 (Usp19), mRNA (23); Putative uncharacterized protein USP19 (23); Ubiquitin carboxyl-terminal hydrolase 19 (23)
TEENENKIKKLKG	0.96	0.21	RB1-inducible coiled-coil protein 1 (891)
LKVEQEKMLLENK	0.69	0.1	CCDC88A protein (1224); Putative uncharacterized protein CCDC88A (400); Putative uncharacterized protein CCDC88A (210); Putative uncharacterized protein CCDC88A (427); Girdin (1225); cDNA FLJ10392 fis, clone NT2RM4000169, weakly similar to INTRACELLULAR PROTEIN TRANSPORT PROTEIN USO1 (104); KIAA1212 protein (184)
PPSCKRKVGGTSG	0.94	0.27	BRCA1 associated RING domain 1 (371); cDNA, FLJ95007, highly similar to Homo sapiens BRCA1 associated RING domain 1 (BARD1), mRNA (371); cDNA FLJ51596, highly similar to BRCA1-associated RING domain protein 1 (227); BRCA1-associated RING domain protein 1 (371); BRCA1 associated RING domain 1 variant (371)
TPSLRRKTMCGTL	0.87	0.15	Serine/threonine-protein kinase 13 (197); Aurora-C (194); Aurora/Ipl1-related kinase 3 transcript variant 1 (178)
ALKRIHKELNDLA	0.73	0.1	Ubiquitin-conjugating enzyme E2 D2 (8)
QIKNRMKKTDWLF	0.88	0.16	Ubiquitin thioesterase ZRANB1 (260)
GTGPPIKAEPKAP	1	0.19	Myelin gene regulatory factor (123)
IPRQVLKYDDFLK	0.78	0.12	cDNA FLJ60782, highly similar to Rho-GTPase-activating protein 1 (212); CDC42 GAP-related protein (108); Rho GTPase-activating protein 1 (212)
RGVMINKDVTHPR	0.89	0.18	Putative uncharacterized protein CCT3 (184); cDNA FLJ44436 fis, clone UTERU2019706, highly similar to T-complex protein 1 subunit gamma (199); cDNA, FLJ79286, highly similar to T-complex protein 1 subunit gamma (177); PIG48 (222); Chaperonin containing TCP1, subunit 3 (Gamma) variant (254); Chaperonin containing TCP1, subunit 3 (Gamma) (246); Chaperonin containing TCP1, subunit 3 (Gamma) (199); T…
EDEKPPKKSLLSK	0.89	0.15	cDNA FLJ76216, highly similar to Homo sapiens xeroderma pigmentosum, complementation group C (XPC), mRNA (44); cDNA FLJ54356, highly similar to DNA-repair protein complementing XP-C cells (44); Xeroderma pigmentosum complementation group C protein (9); Mutant mutant xeroderma pigmentosum complementation group C protein (9); DNA repair protein complementing XP-C cells (44)
TKQKLEKAENQVL	0.64	0.17	cDNA FLJ43643 fis, clone STOMA2008546, highly similar to B-cell receptor-associated protein 31 (271); B-cell receptor-associated protein 31 (204); B-cell receptor-associated protein 31 variant (204)
EMKSAPKKSKADG	0.82	0.12	Putative uncharacterized protein HCFC1 (2073); Putative uncharacterized protein HCFC1 (604); Host cell factor 1 (2028)
GGGPQGKKGKNEP	0.98	0.22	Msx2-interacting protein (1998)
KKSLLSKVSQGKR	0.83	0.1	cDNA FLJ76216, highly similar to Homo sapiens xeroderma pigmentosum, complementation group C (XPC), mRNA (50); cDNA FLJ54356, highly similar to DNA-repair protein complementing XP-C cells (50); Xeroderma pigmentosum complementation group C protein (15); Mutant mutant xeroderma pigmentosum complementation group C protein (15); DNA repair protein complementing XP-C cells (50)
LYHEADKTYMLRE	0.89	0.08	TIP41-like protein (207)
EVAGDDKYGRKII	0.78	0.08	cDNA FLJ60782, highly similar to Rho-GTPase-activating protein 1 (80); Rho GTPase-activating protein 1 (80)
MLKEGAKHFSGLE	1.01	0.08	Putative uncharacterized protein CCT8 (12); Chaperonin containing TCP1, subunit 8 (Theta) variant (20); T-complex protein 1 subunit theta (20)
KKRLQEKCQALER	0.71	0.16	cDNA FLJ53267, highly similar to Optineurin (276); cDNA, FLJ79070, highly similar to Optineurin (276); Optineurin (333)
VPEEDLKRTMMAC	0.89	0.14	Putative uncharacterized protein CCT7 (116); Chaperonin containing TCP1, subunit 7 (Eta), isoform CRA_a (192); Chaperonin containing TCP1, subunit 7 (Eta), isoform CRA_c (276); cDNA FLJ59364, highly similar to T-complex protein 1 subunit eta (233); cDNA FLJ54568, highly similar to T-complex protein 1 subunit eta (220); Putative uncharacterized protein CCT7 (278); Putative uncharacterized protein …
AMCEMEKKLKEER	1.12	0.16	Rho-associated protein kinase 1 (718)
VKRLGDKHATLQK	1	0.24	cDNA, FLJ94025, highly similar to Homo sapiens tripartite motif-containing 28 (TRIM28), mRNA (266); Transcription intermediary factor 1-beta (266)
YGDNAEKYKDLVP	1.01	0.19	UPF0568 protein C14orf166 (98); cDNA, FLJ92278 (98); CLE (98)
ASKNDDKKKDAKK	0.88	0.1	Cylicin-1 (396); CYLC1 protein (302); CYLC1 protein (395)
KYIQGLKNNMNCE	0.95	0.22	Protein Njmu-R1 (177)
DTKTSAKEEDAFH	1.04	0.29	cDNA, FLJ95243, highly similar to Homo sapiens ubiquitin carboxyl-terminal hydrolase L5 (UCHL5), mRNA (158); cDNA FLJ60356, highly similar to Ubiquitin carboxyl-terminal hydrolase isozymeL5 (EC 3.4.19.12) (34); cDNA, FLJ78963, highly similar to Ubiquitin carboxyl-terminal hydrolase isozyme L5 (EC 3.4.19.12) (34); Ubiquitin carboxyl-terminal hydrolase L5 (48); Ubiquitin carboxyl-terminal hydrolase…
KYPPPYKHFWTAE	0.7	0.12	cDNA FLJ54706, highly similar to Ubiquitin-associated protein 2-like (890)
KSWVNEKMKTATD	0.71	0.1	Putative uncharacterized protein SPTAN1 (592); cDNA FLJ59116, highly similar to Spectrin alpha chain, brain (592); cDNA FLJ61399, highly similar to Spectrin alpha chain, brain (592); Spectrin alpha chain, brain (592)
KDVKEFKPESSLT	0.59	0.1	Calpain-7-like protein (343)
TATISAKPQITNP	0.63	0.11	cDNA FLJ58174, highly similar to WW domain-binding protein 11 (513); cDNA FLJ60194, highly similar to WW domain-binding protein 11 (531); WW domain-binding protein 11 (565)
AEIYKSKLKEEAE	0.88	0.12	Meiosis-specific nuclear structural 1, isoform CRA_a (203); Meiosis-specific nuclear structural protein 1 (335)
DHLKDEKEKLLKE	1.01	0.19	cDNA FLJ51002, highly similar to Nuclear factor erythroid 2-related factor 2 (520); cDNA FLJ51196, highly similar to Nuclear factor erythroid 2-related factor 2 (513); cDNA, FLJ79047, highly similar to Nuclear factor erythroid 2-related factor 2 (520); Nuclear factor erythroid 2-related factor 2 (536)
SSTKSGKFMNPTD	1.23	0.25	cDNA FLJ58174, highly similar to WW domain-binding protein 11 (13); cDNA FLJ60194, highly similar to WW domain-binding protein 11 (13); WW domain-binding protein 11 (13)
VLEEAKKPRVMGD	0.9	0.15	Histone acetyltransferase KAT2B (442)
HRKNNEKAQEASV	0.76	0.12	Spectrin, beta, erythrocytic (1262); Beta-spectrin (327); Spectrin, beta, erythrocytic (Includes spherocytosis, clinical type I) variant (1266); Spectrin beta chain, erythrocyte (1262)
RQGAELKAAEAEV	0.66	0.1	Aldehyde dehydrogenase family 16 member A1 (618); cDNA FLJ60673, highly similar to Homo sapiens aldehyde dehydrogenase 16 family, member A1 (ALDH16A1), mRNA (567); cDNA FLJ51525, highly similar to Homo sapiens aldehyde dehydrogenase 16 family, member A1 (ALDH16A1), mRNA (455); cDNA FLJ51526, highly similar to Homo sapiens aldehyde dehydrogenase 16 family, member A1 (ALDH16A1), mRNA (453)
RINEDPKDALLRQ	0.93	0.18	cDNA FLJ60533, highly similar to Kinesin-like protein KIF3A (356); Putative uncharacterized protein KIF3A (356); Kinesin-like protein KIF3A (356); KIF3A protein (326); Kinesin-like protein KIF3Abeta (356); Putative uncharacterized protein (356)
VKTLNPKAEVARA	0.84	0.16	Putative uncharacterized protein CCT6A (10); cDNA, FLJ94440, highly similar to Homo sapiens chaperonin containing TCP1, subunit 6A (zeta 1)(CCT6A), mRNA (10); Chaperonin containing TCP1, subunit 6A isoform a variant (8); T-complex protein 1 subunit zeta (10)
DEADDEKMKELLR	1.37	0.31	Ankyrin repeat domain-containing protein 31 (1265)
DESAAKKPKWDDF	1.38	0.32	Pumilio domain-containing protein KIAA0020 (107)
HTMKEAKDMKNKL	0.93	0.2	Regulator of G-protein signalling 3, isoform CRA_b (142); RGS3 isoform RGS3S (142); RGS3 protein (66); RGS3 protein (72); cDNA FLJ30022 fis, clone 3NB692001002, highly similar to REGULATOR OF G-PROTEIN SIGNALING 3 (115)
QQESLNKWKSKGR	1.09	0.18	Autoantigen La (328); Lupus La protein (328); La 4.1 protein (216); Ribonucleoprotein (La) (275); Sjogren syndrome antigen B (Autoantigen La), isoform CRA_c (328); SS-B/La protein (50)
KMLMKWKEMADRY	0.97	0.17	cDNA FLJ60075, highly similar to CTP synthase 1 (EC 6.3.4.2) (286); cDNA FLJ59392, highly similar to CTP synthase 1 (EC 6.3.4.2) (55); cDNA FLJ58563, highly similar to CTP synthase 1 (EC 6.3.4.2) (130); CTP synthase 1 (286)
YKEQESKKGFDQE	1.19	0.3	DNA-directed RNA polymerase (819); DNA-directed RNA polymerase (745); DNA-directed RNA polymerase (813); DNA-directed RNA polymerase (729); DNA-directed RNA polymerase II subunit RPB2 (820)
KAEKDSKAEQAKV	1.42	0.21	cDNA FLJ57657, highly similar to Charged multivesicular body protein 1a (27); Charged multivesicular body protein 1a (27)
PKWDDFKKKKKEL	1.24	0.27	Pumilio domain-containing protein KIAA0020 (114)
EEIKSSKDQLKEL	1.01	0.15	Centromere protein F (2757); PRO1779 (60)
RQIEQEKLASMKK	0.92	0.11	Putative uncharacterized protein SRRM1 (140); cDNA FLJ57710, highly similar to Serine/arginine repetitive matrix protein 1 (39); cDNA FLJ61739, highly similar to Serine/arginine repetitive matrix protein 1 (140); Serine/arginine repetitive matrix protein 1 (140)
TIDNMGKEIPTDA	1.33	0.27	Amine oxidase [flavin-containing] A (136); Monoamine oxidase A (136); Monoamine oxidase A variant (136); Monoamine oxidase A, isoform CRA_a (136); Monoamine oxidase A (34)
MQPWHGKAMQRAS	1.19	0.19	Chromosome 6 open reading frame 150 (7); Uncharacterized protein C6orf150 (7)
MVKNAEKYAEEDR	1.1	0.09	Catecholamine-regulated protein 40 (234); cDNA FLJ51903, highly similar to Stress-70 protein, mitochondrial (520); cDNA FLJ51907, highly similar to Stress-70 protein, mitochondrial (553); Stress-70 protein, mitochondrial (567); HSPA9 protein (569)
QEGVDPKKLDSLT	1.01	0.16	cDNA FLJ53969, highly similar to Trifunctional enzyme subunit alpha, mitochondrial (379); cDNA FLJ54509, highly similar to Trifunctional enzyme subunit alpha, mitochondrial (523); Trifunctional enzyme subunit alpha, mitochondrial (569); Putative uncharacterized protein HADHA (343)
QPDEELKPKKKVF	1.02	0.15	Tyrosyl-tRNA synthetase, cytoplasmic (482)
LACEESKRKELEK	0.97	0.15	cDNA FLJ78259 (330); cDNA FLJ10623 fis, clone NT2RP2005520, highly similar to Structural maintenance of chromosome 2-like 1 protein (330); SMC2 protein (330); Chromosome-associated protein E (330); SMC2 protein (185); Structural maintenance of chromosomes protein 2 (330)
SEPSEMKAMALKG	1.13	0.23	Putative uncharacterized protein DKFZp451F1115 (622); Rho/Cdc42/Rac GTPase-activating protein RICS (688)
VKEFKSKLGKEKN	1.33	0.31	Protein TMED8 (174)
EPKFMSKVIGANK	0.9	0.22	Thyroid hormone receptor-associated protein 3 (455)
KNDDLNKPINKGR	1.11	0.2	cDNA FLJ11695 fis, clone HEMBA1005019, highly similar to Homo sapiens SCC-112 protein (SCC-112), mRNA (286); Sister chromatid cohesion protein PDS5 homolog A (1290); PDS5A protein (331)
IAPKREKTHGEVE	0.98	0.3	VCP protein (153); Valosin-containing protein (253); Transitional endoplasmic reticulum ATPase (315)
SKMAEEKLTHKME	0.93	0.17	Stathmin (100)
GLHREGKPINLSH	0.78	0.11	Transcription factor ETV6 (302)
SKEKQEKITDTFK	0.85	0.15	cDNA, FLJ93738, highly similar to Homo sapiens thymine-DNA glycosylase (TDG), mRNA (97); cDNA FLJ59972, highly similar to G/T mismatch-specific thymine DNA glycosylase (EC 3.2.2.-) (97); TDG protein (72); G/T mismatch-specific thymine DNA glycosylase (97)
RVPRSGKPAELLK	1.04	0.13	cDNA FLJ32530 fis, clone SMINT2000185, highly similar to TRANSKETOLASE (EC 2.2.1.1) (332); cDNA FLJ36348 fis, clone THYMU2007025, highly similar to TRANSKETOLASE (EC 2.2.1.1) (514); cDNA FLJ54957, highly similar to Transketolase (EC 2.2.1.1) (605); cDNA FLJ53217, highly similar to Transketolase (EC 2.2.1.1) (399); cDNA FLJ56274, highly similar to Transketolase (EC 2.2.1.1) (550); Transketolase va…
KASESSKPWPDAT	0.98	0.19	THRAP3 protein (221); Thyroid hormone receptor-associated protein 3 (221)
KTETQEKNPLPSK	0.97	0.14	cDNA, FLJ92006, Homo sapiens thymosin, beta 4, X chromosome (TMSB4X), mRNA (26); TMSB4X protein (52); TMSB4X protein (51); TMSB4X protein (45); TMSB4X protein (47); Thymosin beta-4-like protein 1 (26); Putative thymosin beta-4-like protein 2 (26); Thymosin beta-4-like protein 3 (26); Thymosin beta-4-like protein 6 (26); Thymosin beta-4 (26)
LTEEDQKKLHDFE	0.88	0.18	Transient receptor potential cation channel subfamily M member 7 (1168)
GLKAPVKYEEDEF	1.04	0.2	Tesmin (40); MTL5 protein (23)
AAGHYAKGDISSR	0.86	0.09	Putative uncharacterized protein SPTAN1 (1519); Putative uncharacterized protein DKFZp564P0562 (508); Spectrin alpha chain, brain (1519)
YSTKEDKYEEEIK	0.87	0.11	Beta tropomyosin isoform (220); Tropomyosin 2 (Beta) (220); Tropomyosin beta chain (220)
EKEAQKKREEEHK	0.9	0.19	Ubinuclein-1 (261)
EQQQIEKEIKEKD	0.74	0.11	cDNA FLJ77162, highly similar to Homo sapiens SMC1 structural maintenance of chromosomes 1-like 1 (SMC1L1), mRNA (282); SMC1A protein (282); Putative uncharacterized protein DKFZp686L19178 (260); Structural maintenance of chromosomes protein 1A (282)
KSRKASKEQGPTP	0.7	0.13	cDNA FLJ59295, highly similar to Chromodomain-helicase-DNA-binding protein 6 (EC 3.6.1.-) (164); Putative uncharacterized protein CHD6 (186); Chromodomain-helicase-DNA-binding protein 6 (186)
LRDKEMKLTDIRL	0.91	0.23	Putative uncharacterized protein NAV2 (922); NAV2 protein (1861); cDNA FLJ77876, highly similar to Homo sapiens neuron navigator 2, mRNA (303); Putative uncharacterized protein NAV2 (1833); Neuron navigator 2 (1917)
YTITPVKMRKSGG	0.68	0.13	cDNA FLJ57498, highly similar to Homo sapiens mitochondrial ribosomal protein L2 (MRPL2), mRNA (78); Putative uncharacterized protein MRPL2 (78); 39S ribosomal protein L2, mitochondrial (78)
NTPRRNKLDHYAI	0.66	0.07	NA
LKEVDSKLQENPE	0.53	0.14	cDNA FLJ56521, highly similar to Homo sapiens transcription termination factor, RNA polymerase I (TTF1), mRNA (700); Putative uncharacterized protein TTF1 (700); Transcription termination factor 1 (700)
VKRLEHKLKEEEE	0.44	0.07	cDNA FLJ16153 fis, clone BRAMY3000210, highly similar to Nesprin-1 (1001); cDNA FLJ55924, highly similar to Nesprin-1 (595); cDNA, FLJ79000, highly similar to Nesprin-1 (595); Spectrin repeat containing, nuclear envelope 1 (8393); Spectrin repeat containing, nuclear envelope 1 (2808); SYNE1 protein (681); Spectrin repeat containing, nuclear envelope 1 (548); Spectrin repeat containing, nuclear en…
EEKEDPKGIPEFW	0.91	0.26	cDNA FLJ30458 fis, clone BRACE2009421, highly similar to NUCLEOSOME ASSEMBLY PROTEIN 1-LIKE 1 (165); Nucleosome assembly protein 1-like 1, isoform CRA_c (97); cDNA FLJ60539, highly similar to Nucleosome assembly protein 1-like 1 (165); cDNA FLJ58569, highly similar to Nucleosome assembly protein 1-like 1 (123); Nucleosome assembly protein 1-like 1 (165)
KESWHGKPLPKNM	0.96	0.2	cDNA FLJ36348 fis, clone THYMU2007025, highly similar to TRANSKETOLASE (EC 2.2.1.1) (177); cDNA FLJ54957, highly similar to Transketolase (EC 2.2.1.1) (268); cDNA FLJ53217, highly similar to Transketolase (EC 2.2.1.1) (62); cDNA FLJ56274, highly similar to Transketolase (EC 2.2.1.1) (213); Transketolase variant (260); Transketolase (260)
EDYPSGKKRAGTD	1.31	0.28	cDNA FLJ55635, highly similar to pre-mRNA-splicing factorATP-dependent RNA helicase DHX15 (EC 3.6.1.-) (17); Putative pre-mRNA-splicing factor ATP-dependent RNA helicase DHX15 (17)
QVSEEVKTRHSEK	1.19	0.14	cDNA, FLJ92530, highly similar to Homo sapiens chromogranin B (secretogranin 1) (CHGB), mRNA (153); cDNA FLJ58131, highly similar to Secretogranin-1 (65); Secretogranin-1 (153)
ITTKDLKEKKEVV	1.15	0.16	Putative uncharacterized protein PTMA (39); Putative uncharacterized protein PTMA (18); Prothymosin alpha (18); cDNA, FLJ94794, highly similar to Homo sapiens prothymosin, alpha (gene sequence 28) (PTMA), mRNA (18); PTMA protein (18); Prothymosin alpha protein (18); Prothymosin, alpha (18)
TPAPPDKLGGKQR	1.24	0.37	Putative uncharacterized protein RAI1 (1083); Putative uncharacterized protein RAI1 (1035); Retinoic acid-induced protein 1 (1083)
FSDPTSKMRHLET	0.93	0.16	cDNA FLJ50647, highly similar to Zinc finger and BTB domain-containing protein 17 (370); cDNA FLJ50726, highly similar to Zinc finger and BTB domain-containing protein17 (351); cDNA FLJ50396, highly similar to Zinc finger and BTB domain-containing protein 17 (389); cDNA FLJ54401, highly similar to Zinc finger and BTB domain-containing protein17 (352); Zinc finger and BTB domain containing 17 vari…
STTTNEKITKLYE	0.92	0.1	AT-rich interactive domain-containing protein 1A (1007); ARID1A variant protein (661); AT rich interactive domain 1A (SWI-like) (47); SWI related protein (624)
EIEKFDKSKLKKT	0.87	0.19	cDNA, FLJ92006, Homo sapiens thymosin, beta 4, X chromosome (TMSB4X), mRNA (15); TMSB4X protein (41); TMSB4X protein (40); TMSB4X protein (34); TMSB4X protein (36); HCG1780554 (15); Putative thymosin beta-4-like protein 2 (15); Thymosin beta-4-like protein 6 (15); Thymosin beta-4 (15); Thymosin beta-4, Y-chromosomal (15)
IGAGASKLKKLKA	0.8	0.12	cDNA FLJ57216, highly similar to Homo sapiens Rho GTPase activating protein 17 (ARHGAP17), transcript variant 2, mRNA (206); Putative uncharacterized protein ARHGAP17 (288); Rho GTPase-activating protein 17 (295)
VKSKTAKLQDFKS	0.84	0.14	Serine hydroxymethyltransferase (338); Serine hydroxymethyltransferase (443); Serine hydroxymethyltransferase 2 (Mitochondrial), isoform CRA_h (368); Serine hydroxymethyltransferase (395); Serine hydroxymethyltransferase (390); Serine hydroxymethyltransferase (473); Serine hydroxymethyltransferase (402); Serine hydroxymethyltransferase, mitochondrial (464); Serine hydroxymethyltransferase (464); …
ILNSAGKMDKMRL	0.85	0.12	cDNA FLJ51771, highly similar to SWI/SNF-related matrix-associatedactin-dependent regulator of chromatin subfamily A member5 (EC 3.6.1.-) (383); cDNA, FLJ79343, highly similar to SWI/SNF-related matrix-associated actin-dependent regulator of chromatin subfamily A member 5 (EC 3.6.1.-) (383); Putative uncharacterized protein SMARCA5 (173); SWI/SNF-related matrix-associated actin-dependent regulato…
RYVVACKEPKKKZ	1.08	0.17	SAGA-associated factor 29 homolog (288)
KLKPNTKIMMMGT	0.92	0.11	Ubiquitin-like domain-containing CTD phosphatase 1 (71)
NYKKDLKDLKEKV	0.99	0.11	cDNA FLJ58159, highly similar to RAB6-interacting protein 2 (403); ELKS/RAB6-interacting/CAST family member 1 (655)
TTNITKKQKWTVE	1.1	0.18	Telomeric repeat-binding factor 2 (447)
MVARKQKLADSLR	0.95	0.12	Putative uncharacterized protein SPTAN1 (779); cDNA FLJ59116, highly similar to Spectrin alpha chain, brain (779); cDNA FLJ61399, highly similar to Spectrin alpha chain, brain (779); Spectrin alpha chain, brain (779)
PAKKGEKIPKGKK	0.93	0.13	NA
GMTKMAKMIDERQ	1.2	0.15	cDNA FLJ45031 fis, clone BRAWH3018548, highly similar to Vinculin (100); cDNA FLJ59659, highly similar to Vinculin (80); Vinculin (173)
RKREREKLHAVNA	1.04	0.12	Putative uncharacterized protein PECI (192); Peroxisomal 3,2-trans-enoyl-CoA isomerase (359); Peroxisomal D3,D2-enoyl-CoA isomerase isoform 1 variant (329); Peroxisomal D3,D2-enoyl-CoA isomerase (206); PECI protein (329)
KKRLEEKNKKKTE	1.05	0.12	cDNA FLJ57007, highly similar to Microtubule-associated protein 9 (471); Microtubule-associated protein 9 (496)
PSTSKSKGKSPHK	0.94	0.17	Putative uncharacterized protein DNAH7 (113); Putative uncharacterized protein DNAH7 (88); Dynein heavy chain 7, axonemal (113)
GNKPYSKKDYRSZ	1.03	0.16	cDNA FLJ77679, highly similar to Homo sapiens potassium voltage-gated channel, shaker-related subfamily, beta member 2 (KCNAB2), transcript variant 1, mRNA (362); cDNA, FLJ79460, highly similar to Voltage-gated potassium channel subunitbeta-2 (340); cDNA, FLJ79507, highly similar to Voltage-gated potassium channel subunitbeta-2 (295); cDNA, FLJ92727, highly similar to Homo sapiens potassium volta…
QLTFDGKRMRKAV	1.03	0.18	Putative uncharacterized protein WDR33 (46); WDR33 protein (46); WD repeat domain 33 isoform 2 variant (46); WD repeat domain 33 (46); WD repeat domain 33, isoform CRA_b (46); WD repeat-containing protein 33 (46)
LQEQEAKERKTKD	1	0.21	Ubiquitin carboxyl-terminal hydrolase (3187); Putative uncharacterized protein USP34 (217); Putative uncharacterized protein USP34 (1016); Ubiquitin carboxyl-terminal hydrolase (3339); Ubiquitin carboxyl-terminal hydrolase (3104); Ubiquitin carboxyl-terminal hydrolase 34 (3339)
EIASFDKAKLKKT	1.16	0.22	cDNA, FLJ92220, Homo sapiens thymosin, beta 10 (TMSB10), mRNA (15); Thymosin beta-10 (15)
SSEITTKDLKEKK	1.13	0.18	Putative uncharacterized protein PTMA (36); Putative uncharacterized protein PTMA (15); Prothymosin alpha (15); cDNA, FLJ94794, highly similar to Homo sapiens prothymosin, alpha (gene sequence 28) (PTMA), mRNA (15); PTMA protein (15); Prothymosin alpha protein (15); Prothymosin, alpha (15)
KTKKVTKNEEPSE	1.81	0.54	Nucleolar RNA helicase 2 (116)
QQSPKDKLNNKLK	1.2	0.25	cDNA, FLJ79336, highly similar to Homo sapiens Rho GTPase activating protein 11A (ARHGAP11A), transcript variant 1, mRNA (543); Rho GTPase-activating protein 11A (732)
RNEIGGKPFKCEE	1.18	0.18	Putative uncharacterized protein ZNF195 (284); Putative uncharacterized protein (267); Zinc finger protein 195 (408)
APPAPGKKEAPPV	0.97	0.15	cDNA FLJ11201 fis, clone PLACE1007730, highly similar to SAPS domain family member 2 (349); cDNA FLJ12607 fis, clone NT2RM4001489, highly similar to SAPS domain family member 2 (230); Serine/threonine-protein phosphatase 6 regulatory subunit 2 (698)
PGGAGGKGMRIVD	1.12	0.15	cDNA FLJ76180 (47); BUD13 homolog (47)
AMDLKGKMPNKMI	1.15	0.14	cDNA FLJ51417, highly similar to Serine/threonine-protein kinase PRP4 homolog (EC 2.7.11.1) (893); Serine/threonine-protein kinase PRP4 homolog (907)
LTMMARKMKDTDS	1.06	0.19	cDNA FLJ75174, highly similar to Homo sapiens calmodulin 1 (phosphorylase kinase, delta), mRNA (77); cDNA, FLJ96792, highly similar to Homo sapiens calmodulin 2 (phosphorylase kinase, delta) (CALM2), mRNA (76); Calmodulin 3 (Phosphorylase kinase, delta), isoform CRA_b (76); Calmodulin (76); Calmodulin 3 (Phosphorylase kinase, delta), isoform CRA_a (40); CALM3 protein (76)
KAMKSIKVKEEIK	0.99	0.11	Chromodomain-helicase-DNA-binding protein 1 (1346)
MKKLEEKRAELNK	1.07	0.13	Bullous pemphigoid antigen 1, isoforms 6/9/10 (4563); Dystonin (4889); Dystonin (6975)
KVEGYKKTKEAVL	0.91	0.13	cDNA FLJ56689, highly similar to 60S ribosomal protein L4 (163); cDNA FLJ50994, moderately similar to 60S ribosomal protein L4 (52); Ribosomal protein L4 variant (163); Ribosomal protein L4 variant (177); 60S ribosomal protein L4 (163)
PSEKEIKAQQDKL	1.12	0.14	Spectrin, beta, non-erythrocytic 1, isoform CRA_d (927); Spectrin beta chain, brain 1 (927)
SIKLDGKGEPKGA	0.91	0.15	cDNA FLJ76812, highly similar to Homo sapiens IQ motif containing GTPase activating protein 2 (IQGAP2), mRNA (1467); cDNA FLJ52376, highly similar to Ras GTPase-activating-like protein IQGAP2 (757); cDNA FLJ50398, highly similar to Ras GTPase-activating-like protein IQGAP2 (963); Ras GTPase-activating-like protein IQGAP2 (1467); IQ motif containing GTPase activating protein 2 variant (1047)
KISDLWKAHPGKI	0.81	0.17	Putative uncharacterized protein KIAA1199 (348); Protein KIAA1199 (348)
TLKLEDKQRLAQE	0.85	0.11	cDNA, FLJ96584, Homo sapiens pescadillo homolog 1, containing BRCT domain(zebrafish) (PES1), mRNA (521); cDNA FLJ39001 fis, clone NT2RI2022584, highly similar to Pescadillo homolog 1 (382); cDNA FLJ45250 fis, clone BRHIP2008756, highly similar to Pescadillo homolog 1 (382); Putative uncharacterized protein PES1 (504); Putative uncharacterized protein PES1 (127); Pescadillo homolog (521)
AVLLPKKTESHHH	0.99	0.22	Histone H2A type 1-A (120)
KLYERWKKYKNGD	0.81	0.13	Putative uncharacterized protein KIAA0922 (547); Transmembrane protein 131-like (547)
PLSKLMKAYCERQ	1.01	0.19	Putative uncharacterized protein SUMO3 (44); SMT3 suppressor of mif two 3 homolog 3 (Yeast), isoform CRA_d (44); cDNA FLJ57440, moderately similar to Small ubiquitin-related modifier 3 (44); Putative uncharacterized protein ENSP00000391266 (45); Small ubiquitin-related modifier 2 (45); Small ubiquitin-related modifier 3 (44)
LVQTEGKERSLGE	0.9	0.13	N-acetylserotonin O-methyltransferase-like protein (583); cDNA FLJ10228 fis, clone HEMBB1000119, highly similar to N-acetylserotonin O-methyltransferase-like protein (583); cDNA FLJ59356, highly similar to N-acetylserotonin O-methyltransferase-like protein (507); cDNA FLJ55355, highly similar to N-acetylserotonin O-methyltransferase-like protein (573); cDNA FLJ58813, highly similar to N-acetylser…
EARITEKLEKQQK	0.95	0.16	SMARCA4 protein (455); SWI/SNF related, matrix associated, actin dependent regulator of chromatin, subfamily a, member 4, isoform CRA_a (455); SMARCA4 isoform 3 (455); SMARCA4 isoform 2 (455); SMARCA4 isoform 4 (455); SWI/SNF related, matrix associated, actin dependent regulator of chromatin, subfamily a, member 4, isoform CRA_f (455); SWI/SNF-related matrix-associated actin-dependent regulator o…
KTHTKRKAEFEEQ	0.95	0.15	Putative uncharacterized protein CGGBP1 (71); CGG triplet repeat-binding protein 1 (71)
EHKLDGKLIDPKR	0.99	0.2	Heterogeneous nuclear ribonucleoprotein D-like (216)
RTHTGSKPFKCKI	1.05	0.25	Zinc finger protein 407 (1565)
KLLDDIKMLNKPK	0.85	0.13	Syntaxin-binding protein 3 (577)
PKHLNMKLTRAQF	0.71	0.12	Catecholamine-regulated protein 40 (12); cDNA FLJ51811, highly similar to Stress-70 protein, mitochondrial (276); cDNA FLJ51903, highly similar to Stress-70 protein, mitochondrial (298); cDNA FLJ51907, highly similar to Stress-70 protein, mitochondrial (331); Stress-70 protein, mitochondrial (345); HSPA9 protein (347)
AAPRLLKREPDWG	0.86	0.15	CCAAT/enhancer-binding protein delta (120)
RTDIYSKKTLAKS	0.94	0.17	cDNA FLJ57669, highly similar to SWI/SNF-related matrix-associatedactin-dependent regulator of chromatin subfamily C member 1 (115); cDNA FLJ57671, highly similar to SWI/SNF-related matrix-associated actin-dependent regulator of chromatin subfamily C member 1 (499); SMARCC1 protein (608); SWI/SNF related, matrix associated, actin dependent regulator of chromatin, subfamily c, member 1 (608); SWI/…
AIQERAKEAVTKS	0.68	0.11	Spectrin repeat containing, nuclear envelope 1 (3481); Spectrin repeat containing, nuclear envelope 1 (3488); Nesprin-1 (3481)
EKVKEGKIFDDVS	0.91	0.16	ADP-ribosylation factor GTPase-activating protein 1 (263); cDNA FLJ54522, highly similar to ADP-ribosylation factor GTPase-activating protein 1 (220); cDNA FLJ55014, highly similar to ADP-ribosylation factor GTPase-activating protein 1 (150); ADP-ribosylation factor GTPase activating protein 1, isoform CRA_f (263)
AAAEKFKVQGEAV	0.78	0.11	cDNA, FLJ92170, Homo sapiens nascent-polypeptide-associated complex alpha polypeptide (NACA), mRNA (144); Nascent polypeptide-associated complex subunit alpha (144); Putative nascent polypeptide-associated complex subunit alpha-like protein (143)
SVVSFDKVKEPRK	0.76	0.15	Scaffold attachment factor B (607); cDNA FLJ76656, highly similar to Homo sapiens scaffold attachment factor B (SAFB), mRNA (607); cDNA FLJ59451, highly similar to Scaffold attachment factor B (406); cDNA FLJ54744, highly similar to Scaffold attachment factor B (450); cDNA FLJ59523, highly similar to Scaffold attachment factor B (502); cDNA FLJ54745, highly similar to Scaffold attachment factor B…
FVGGNWKMNGRKQ	0.71	0.18	Triosephosphate isomerase (14)
KMLNKPKDKVSLI	0.82	0.15	Syntaxin-binding protein 3 (583)
MKLLLGKDFPASP	0.71	0.1	Ubiquitin carrier protein (68); UBE2S protein (68); Ubiquitin-conjugating enzyme E2 S (68)
NTRTNEKVELQEL	0.83	0.12	Vimentin variant 3 (104); cDNA FLJ34494 fis, clone HLUNG2005030, highly similar to VIMENTIN (91); Vimentin variant (104); Vimentin (104)
SKSGDSKITFDSE	0.88	0.18	DBF4-type zinc finger-containing protein 2 (1079)
YVSQDPKDQLLLG	0.77	0.12	cDNA FLJ59448, highly similar to Trifunctional enzyme subunit beta, mitochondrial (334); cDNA FLJ55769, highly similar to Trifunctional enzyme subunit beta, mitochondrial (343); cDNA FLJ56214, highly similar to Trifunctional enzyme subunit beta, mitochondrial (326); Putative uncharacterized protein HADHB (225); Trifunctional enzyme subunit beta, mitochondrial (348)
EGVDPKKLDSLTT	0.72	0.09	cDNA FLJ53969, highly similar to Trifunctional enzyme subunit alpha, mitochondrial (380); cDNA FLJ54509, highly similar to Trifunctional enzyme subunit alpha, mitochondrial (524); Trifunctional enzyme subunit alpha, mitochondrial (570); Putative uncharacterized protein HADHA (344)
TPFILKKLDSIZZ	0.6	0.1	Mitochondrial import receptor subunit TOM5 homolog (47)
KPKEGVKTENNDH	0.87	0.18	Putative uncharacterized protein ENSP00000391266 (11); Small ubiquitin-related modifier 2 (11)
SSEKTEKKEEVVK	0.92	0.11	cDNA FLJ36409 fis, clone THYMU2010448, highly similar to Regulator of nonsense transcripts 3B (408); Regulator of nonsense transcripts 3B (421)
KETKEPKKGESWF	1.06	0.2	SEC16A protein (1730); SEC16A protein (1493); Putative uncharacterized protein SEC16A (497); Putative uncharacterized protein SEC16A (461); SEC16 homolog A (S. cerevisiae) (232); SEC16A protein (232); Protein transport protein Sec16A (1925)
RDKEIKKLNEEIE	0.82	0.14	CDC42 binding protein kinase beta (DMPK-like) (489); Serine/threonine-protein kinase MRCK beta (489)
FNPLSRKHGGPKD	1.13	0.16	Superoxide dismutase [Cu-Zn] (52); Superoxide dismutase [Cu-Zn] (71)
KRKLDEKENLSAK	1.26	0.24	cDNA, FLJ96587, highly similar to Homo sapiens SUMO-1 activating enzyme subunit 2 (UBA2), mRNA (617); cDNA FLJ13058 fis, clone NT2RP3001587, highly similar to Ubiquitin-like 1-activating enzyme E1B (617); cDNA FLJ14052 fis, clone HEMBA1006914, highly similar to Ubiquitin-like 1-activating enzyme E1B (349); cDNA FLJ42740 fis, clone BRAWH2016655, highly similar to Ubiquitin-like 1-activating enzyme…
SLKNSLKMLSEKT	0.72	0.15	cDNA FLJ51916, highly similar to Type II inositol-3,4-bisphosphate4-phosphatase (EC 3.1.3.66) (263); cDNA FLJ50877, highly similar to Type II inositol-3,4-bisphosphate4-phosphatase (EC 3.1.3.66) (319); Type II inositol-3,4-bisphosphate 4-phosphatase (448)
FHRFAEKHNFAKP	0.93	0.09	Probable tRNA(His) guanylyltransferase (68)
TEMNYSKYGAKEC	0.9	0.1	Putative uncharacterized protein PHF14 (435); cDNA FLJ61230, highly similar to PHD finger protein 14 (150); Putative uncharacterized protein PHF14 (434); PHD finger protein 14 (435)
PADVLYKGTITRI	0.88	0.08	Putative uncharacterized protein NCOR2 (1240); Putative uncharacterized protein NCOR2 (1231); Putative uncharacterized protein NCOR2 (685); Putative uncharacterized protein NCOR2 (1230); Putative uncharacterized protein NCOR2 (1248); Nuclear receptor corepressor 2 (1248)
EALEAAKRLNAKE	1.04	0.15	Putative uncharacterized protein SUCLG2 (73); Succinyl-CoA ligase [GDP-forming] subunit beta, mitochondrial (73)
SPLLEDKYRRASE	0.95	0.12	Myocyte-specific enhancer factor 2D (116); MEF2D protein (116); MEF2D variant protein (121); Myocyte enhancer factor 2D/deleted in azoospermia associated protein 1 fusion protein (116)
DVEKNRKIVAENL	0.88	0.15	cDNA, FLJ93038, highly similar to Homo sapiens beclin 1 (coiled-coil, myosin-like BCL2 interacting protein) (BECN1), mRNA (206); cDNA FLJ52719, moderately similar to Beclin-1 (130); cDNA FLJ53178, highly similar to Beclin-1 (119); Beclin-1 (206); Beclin 1 variant (206)
KPTKISKFGFAIG	0.82	0.29	PEST proteolytic signal-containing nuclear protein (70); PEST-containing nuclear protein variant (70)
AALAVLKSGNPRG	0.74	0.11	Cyclin-A2 (54)
GITGYGKGKERIL	0.95	0.21	cDNA FLJ61512 (184); Uncharacterized protein C1orf131 (185); Chromosome 1 open reading frame 131, isoform CRA_a (185); Chromosome 1 open reading frame 131 (148)
KTAFKKKDTILSL	0.91	0.17	Coagulation factor VIII (1614)
EYIEENKYSRAKS	1.08	0.1	cDNA FLJ44920 fis, clone BRAMY3011501, highly similar to Heterogeneous nuclear ribonucleoprotein U (190); cDNA FLJ54020, highly similar to Heterogeneous nuclear ribonucleoprotein U (224); Heterogeneous nuclear ribonucleoprotein U (265); Heterogeneous nuclear ribonucleoprotein U (Scaffold attachment factor A) (163); Heterogeneous nuclear ribonucleoprotein U (Scaffold attachment factor A) (42); HNR…
LAKLKNKHEAMIT	0.88	0.11	Myosin-9 (1024); Myosin, heavy polypeptide 9, non-muscle, isoform CRA_a (1024); MYH9 protein (1024); Non-muscle myosin heavy chain (84)
AWVFDDKYKRPGY	0.97	0.09	Eukaryotic translation initiation factor 2 subunit 1 (141); cDNA, FLJ92791, Homo sapiens eukaryotic translation initiation factor 2, subunit 1 alpha, 35kDa (EIF2S1), mRNA (141)
KIWMFDKYGLLVK	0.9	0.09	Malic enzyme (346); NAD-dependent malic enzyme, mitochondrial (346)
TQHDSKKAGAEVV	0.92	0.13	Tyrosyl-tRNA synthetase, cytoplasmic (147)
LERKFGKHGGTIP	0.87	0.1	cDNA FLJ37463 fis, clone BRAWH2011400, highly similar to Glutamate dehydrogenase 1, mitochondrial (EC 1.4.1.3) (437); Glutamate dehydrogenase 1, isoform CRA_a (313); cDNA FLJ55203, highly similar to Glutamate dehydrogenase 1, mitochondrial (EC 1.4.1.3) (347); cDNA FLJ55493, highly similar to Glutamate dehydrogenase 1, mitochondrial (EC 1.4.1.3) (431); cDNA FLJ55926, highly similar to Glutamate de…
EYHCKKKYGVAWE	1.07	0.11	Putative uncharacterized protein LBR (86); Lamin-B receptor (594)
LKTAIGKAGYTDK	0.99	0.12	Alpha-enolase (233); Enolase (71)
ALPSMDKYAVFKG	0.85	0.07	Putative uncharacterized protein SYNRG (513); Putative uncharacterized protein SYNRG (647); AP1GBP1 protein (352); Synergin gamma (513)
SAEVAAKAERVHE	0.79	0.14	cDNA FLJ34725 fis, clone MESAN2005958, highly similar to RNA-binding protein Luc7-like 2 (69); cDNA FLJ36545 fis, clone TRACH2006670, highly similar to RNA-binding protein Luc7-like 2 (122); cDNA FLJ55988, highly similar to RNA-binding protein Luc7-like 2 (188); cDNA FLJ55994, highly similar to RNA-binding protein Luc7-like 2 (119); Putative uncharacterized protein LUC7L2 (119); Putative RNA-bind…
ERASGCKYLDYMQ	0.63	0.07	Serine beta-lactamase-like protein LACTB, mitochondrial (342)
GRAADLKYIEACA	0.85	0.07	cDNA FLJ60093, highly similar to UDP-glucose 6-dehydrogenase (EC 1.1.1.22) (10); Uridine diphospho-glucose dehydrogenase (12); UDP-glucose 6-dehydrogenase (107)
GGTEIGKTLAEKS	0.95	0.13	Zinc finger Ran-binding domain-containing protein 2 (54)
VDSHHQKPVNAII	0.96	0.09	cDNA, FLJ92620, highly similar to Homo sapiens staphylococcal nuclease domain containing 1 (SND1),mRNA (168); cDNA FLJ39264 fis, clone OCBBF2009603, highly similar to Staphylococcal nuclease domain-containing protein 1 (183); cDNA FLJ54574, highly similar to Staphylococcal nuclease domain-containing protein 1 (172); EBNA-2 co-activator variant (247); Staphylococcal nuclease domain-containing prot…
PPVSHWKPEAVQY	1	0.13	Phosphoglycerate mutase 5, long isoform (191); Putative uncharacterized protein PXMP2 (191); Serine/threonine-protein phosphatase PGAM5, mitochondrial (191)
RASDSHKCDKRYR	1.19	0.26	Putative uncharacterized protein TIRAP (248)
GSGDVHKMVVSIG	1.13	0.45	cDNA, FLJ96841 (67); Putative uncharacterized protein RFK (47); Riboflavin kinase (60)
SPALDGKVERDSE	1.11	0.36	Putative uncharacterized protein PPIP5K1 (281); cDNA FLJ61589 (270); Inositol hexakisphosphate and diphosphoinositol-pentakisphosphate kinase 1 (281); Inositol hexakisphosphate and diphosphoinositol-pentakisphosphate kinase 2 (270)
TEWLDGKHVVFGK	1.01	0.11	Peptidyl-prolyl cis-trans isomerase (125); Peptidyl-prolyl cis-trans isomerase (89); Peptidyl-prolyl cis-trans isomerase A (125); cDNA FLJ75025, highly similar to Homo sapiens peptidylprolyl isomerase A (cyclophilin A) (PPIA), transcript variant 2, mRNA (65)
ZMEAIAKYDFKAT	1.12	0.13	cDNA, FLJ96637, Homo sapiens growth factor receptor-bound protein 2 (GRB2), mRNA (7); cDNA FLJ33691 fis, clone BRAWH2002976, highly similar to GROWTH FACTOR RECEPTOR-BOUND PROTEIN 2 (7); Growth factor receptor-bound protein 2 (7); GRB2 protein (7)
KVHAEEKLDRANA	1.22	0.2	TACC2 protein (2762); TACC2 protein (2811); Transforming, acidic coiled-coil containing protein 2 (2611); HCG41426, isoform CRA_c (511); Transforming, acidic coiled-coil containing protein 2 (768); Transforming, acidic coiled-coil containing protein 2 (974); Transforming acidic coiled-coil-containing protein 2 (2884)
ZZMESGKTASPKS	1.13	0.16	Transcription initiation factor TFIID subunit 9 (7)
MNARQSKCYEMED	1.3	0.28	V(D)J recombination-activating protein 1 (983)
VCPDLVKEFNKYD	1.25	0.13	Actin-related protein 3 (240); cDNA FLJ51082, highly similar to Actin-like protein 3 (178); cDNA FLJ52521, highly similar to Actin-like protein 3 (111); cDNA, FLJ79295, highly similar to Actin-like protein 3 (189); cDNA, FLJ93049, Homo sapiens ARP3 actin-related protein 3 homolog (yeast) (ACTR3), mRNA (240); ARP3 actin-related protein 3 homolog variant (191)
DFLPPKKIKDPDA	1.32	0.19	cDNA FLJ53009, highly similar to Calreticulin (191); cDNA FLJ58668, highly similar to Calreticulin (86); Calreticulin (207); Calreticulin variant (196)
EKREHEKEVLQKA	1.06	0.18	Stathmin (80)
EPIFGKKPRIEES	1.19	0.16	cDNA FLJ76877, highly similar to Homo sapiens superkiller viralicidic activity 2-like 2 (SKIV2L2), mRNA (79); Superkiller viralicidic activity 2-like 2 (79)
AKRTLSKKEQEEL	1.19	0.19	cDNA FLJ60621 (98); Putative uncharacterized protein ENSP00000418694 (98); Putative uncharacterized protein ENSP00000418465 (98); Putative uncharacterized protein ENSP00000420575 (68); U2-associated protein SR140 (98)
HKPDQQKLQALKD	1.11	0.13	cDNA FLJ36348 fis, clone THYMU2007025, highly similar to TRANSKETOLASE (EC 2.2.1.1) (11); cDNA FLJ54957, highly similar to Transketolase (EC 2.2.1.1) (11); Putative uncharacterized protein TKT (11); Transketolase variant (11); Transketolase (11)
AEKEAQKKPAESQ	1.25	0.16	Cyclin-A2 (112)
EMLKYKKEKQQEE	1.3	0.23	cDNA FLJ16598 fis, clone TESTI4006473, weakly similar to ATP-dependent RNA helicase A (309); Probable ATP-dependent RNA helicase YTHDC2 (399)
SSVLDKKEGEQAK	1.11	0.21	Leucine-rich repeat-containing protein 8B (229)
YHESDSKKSEDLS	0.96	0.15	Toll-like receptor adapter molecule 2 (TICAM-2) (Putative NF-kappa-B- activating protein 502). (204); TIR domain-containing adapter molecule 2 (35)
TQMPKWKESSHQG	0.97	0.17	cDNA FLJ16254 fis, clone HLUNG2015418, highly similar to Homo sapiens Cadherin (799); cDNA FLJ54530, weakly similar to Cadherin-related tumor suppressor homolog (724); Cadherin-like protein 28 (812)
ZZZZZMKIKDAKK	1.08	0.14	Pantothenate kinase 3 (7)
DTIINQKRFNDGS	0.92	0.32	ATP synthase subunit alpha (180); ATP synthase subunit alpha, mitochondrial (230); ATP synthase subunit alpha (208)
PKSSGSKDTQPRK	0.98	0.15	cDNA FLJ56834 (394); Serine/threonine-protein phosphatase 4 regulatory subunit 4 (857)
EAQMAAKLERLRE	1.1	0.14	Stathmin (119)
EVNGDTKWHSFKS	1.2	0.14	TET2 protein (53); Putative uncharacterized protein TET2 (53); Probable methylcytosine dioxygenase TET2 (53)
HLERMKKNMEQTI	1.2	0.2	MYH7 protein (1783); Myosin-6 (1786); Myosin-7 (1784); Myosin heavy chain beta-subunit (460); Myosin, heavy polypeptide 7, cardiac muscle, beta variant (1423); Rhabdomyosarcoma antigen MU-RMS-40.7B (1028)
GIKTNAKKDGSDW	0.8	0.14	Long-chain specific acyl-CoA dehydrogenase, mitochondrial (189)
KQQDSDKLNSLSV	1.05	0.15	cDNA, FLJ93649, Homo sapiens calcium modulating ligand (CAMLG), mRNA (72); Calcium signal-modulating cyclophilin ligand (72)
GSGNSGKGGNQLR	0.93	0.12	ATP-dependent Clp protease ATP-binding subunit clpX-like, mitochondrial (98); Putative uncharacterized protein DKFZp586J151 (98)
PSAEFMKKLQPTV	1.11	0.18	Mitogen-activated protein kinase 9 isoform JNK2 alpha2 (250); Mitogen-activated protein kinase 9 (250)
AGARREKGEMRFN	0.85	0.15	NA
SKNDDKKKDAKKI	1.01	0.16	Cylicin-1 (397); CYLC1 protein (303); CYLC1 protein (396)
KAGSMSKQELDDI	1.66	0.25	cDNA FLJ59330, highly similar to Chromodomain helicase-DNA-binding protein 3 (EC 3.6.1.-) (201); Chromodomain-helicase-DNA-binding protein 3 (1222)
LAMKLLKELHKES	1.21	0.24	DNA-dependent protein kinase catalytic subunit (3260)
ZZMKSGKDSQIPG	1.25	0.18	CDNA FLJ26514 fis, clone KDN07578 (7)
TGVDLTKDNMALQ	0.81	0.12	cDNA FLJ51811, highly similar to Stress-70 protein, mitochondrial (231); cDNA FLJ51903, highly similar to Stress-70 protein, mitochondrial (253); cDNA FLJ51907, highly similar to Stress-70 protein, mitochondrial (286); Stress-70 protein, mitochondrial (300); Heat shock 70 kDa protein 9B (168); HSPA9 protein (302)
ZZZZMAKDAGLIE	0.94	0.19	Transcription factor Dp-1 (7)
RVDLPDKYPFKSP	0.85	0.15	Ubiquitin carrier protein (60); Ubiquitin-conjugating enzyme E2H (UBC8 homolog, yeast) (60); Putative uncharacterized protein UBE2H (52); Ubiquitin carrier protein (27); Putative uncharacterized protein UBE2H (60); Putative uncharacterized protein UBE2H (76); Ubiquitin-conjugating enzyme (60); Ubiquitin-conjugating enzyme E2 H (60)
ZMPEPAKFAPAPK	0.76	0.19	Putative histone H2B type 2-C (7); Putative histone H2B type 2-D (7)
DHIPEKKFKSEAL	1.61	0.25	cDNA FLJ58450, highly similar to Inhibitor of growth protein 3 (150); Inhibitor of growth protein 3 (165); Transcriptional regulator ING2 (165)
MDTESKKDPEGCD	1.14	0.33	cDNA FLJ78654, highly similar to Homo sapiens nuclear factor of kappa light polypeptide gene enhancer in B-cells 1 (p105) (NFKB1), mRNA (442); cDNA FLJ16470 fis, clone BRHIP3009181, highly similar to NUCLEAR FACTOR NF-KAPPA-B P105 SUBUNIT (261); Nuclear factor NF-kappa-B p105 subunit (441)
KFKDPLKDGEAKI	0.89	0.16	cDNA FLJ51804, highly similar to Vacuolar ATP synthase catalytic subunit A, ubiquitous isoform (EC 3.6.3.14) (558); cDNA FLJ53889, highly similar to Vacuolar ATP synthase catalytic subunit A, ubiquitous isoform (EC 3.6.3.14) (308); V-type proton ATPase catalytic subunit A (591)
TWKSLSKQELNQM	0.9	0.15	EF-hand domain-containing family member A2 (188)
DKGGKDKKQIQTS	1.09	0.21	Serine/threonine-protein kinase LATS2 (570); LATS, large tumor suppressor, homolog 2 variant (576)
QQSKILKVIRKNL	1.19	0.18	Heat shock protein HSP 90-alpha (410); Hsp89-alpha-delta-N (217); HSP90AA1 protein (410); Heat shock protein 90Af (9); Full-length cDNA clone CS0CAP007YF18 of Thymus of Homo sapiens (human) (231); HSP90AA1 protein (316); HSP90AA1 protein (100)
SSDSDGKLEKAIA	1.12	0.21	Putative uncharacterized protein SNTN (76); Putative uncharacterized protein SNTN (72); Sentan (76)
PDLGTDKDKEQWK	1.25	0.21	L-lactate dehydrogenase (222); L-lactate dehydrogenase (195); L-lactate dehydrogenase (164); L-lactate dehydrogenase (251); L-lactate dehydrogenase A chain (222)
TGGAASKLSKIRV	1.41	0.23	60S ribosomal protein L35 (43)
EQESTKKPYRIES	1	0.18	Putative uncharacterized protein RSF1 (1298); Remodeling and spacing factor 1 (1339)
NEKSDPKVTLKDD	0.91	0.29	cDNA, FLJ95353, Homo sapiens sodium channel, voltage-gated, type IV, beta (SCN4B),mRNA (92); Sodium channel subunit beta-4 (92)
KTVTFSKLZZZZZ	1.13	0.42	Delta(3,5)-Delta(2,4)-dienoyl-CoA isomerase, mitochondrial (327)
RKEIPAKIIFEDD	1.1	0.16	Histidine triad nucleotide-binding protein 1 (30)
EKFDKSKLKKTET	0.97	0.18	cDNA, FLJ92006, Homo sapiens thymosin, beta 4, X chromosome (TMSB4X), mRNA (17); TMSB4X protein (43); TMSB4X protein (42); TMSB4X protein (36); TMSB4X protein (38); Thymosin beta-4-like protein 1 (17); Putative thymosin beta-4-like protein 2 (17); Thymosin beta-4-like protein 6 (17); Thymosin beta-4 (17); Thymosin beta-4, Y-chromosomal (17)
SSNVSYKYSKVNK	1.06	0.16	Cation-independent mannose-6-phosphate receptor (2352); Insulin-like growth factor 2 receptor variant (2275)
NKYNTPKYRMIVR	1.3	0.43	cDNA, FLJ95579, Homo sapiens ribosomal protein L5 (RPL5), mRNA (48); Ribosomal protein L5 variant (55); Ribosomal protein L5, isoform CRA_a (48); 60S ribosomal protein L5 (48)
VQGSTSKHEFQAE	1.09	0.19	TNF receptor-associated protein 1 variant (87); TNF receptor-associated protein 1 variant (86); TRAP1 protein (82); Heat shock protein 75 kDa, mitochondrial (87)
MGLNLRKDQKKTK	1.26	0.22	NOEL1C (129); No Rab11-binding protein 1B (129); No Rab11-binding protein 1A (129); FLJ00355 protein (48); Rab11 family-interacting protein 1 (800)
NIACSGKFSSDRT	1.15	0.25	Phosphorylase (720); Glycogen phosphorylase, brain form (811); Phosphorylase (833); Phosphorylase (229); Phosphorylase (170)
GEKKESKPAATTR	0.99	0.13	AFG3-like protein 2 (100); Similar to AFG3 ATPase family gene 3-like 2 (Yeast) (115)
NAENAQKFKTKFE	0.97	0.24	cDNA FLJ40340 fis, clone TESTI2032681, moderately similar to RAN-SPECIFIC GTPASE-ACTIVATING PROTEIN (60); Putative uncharacterized protein RANBP1 (77); Putative uncharacterized protein RANBP1 (100); Putative uncharacterized protein RANBP1 (203); RAN binding protein 1 variant (150); Ran-specific GTPase-activating protein (150)
GTSISTKPPLTKD	0.96	0.14	Replication factor C (Activator 1) 4, 37kDa, isoform CRA_b (13); Putative uncharacterized protein RFC4 (13); Replication factor C subunit 4 (13)
VEPASEKDPESLR	0.98	0.19	Ets variant gene 3, isoform CRA_a (388); ETS translocation variant 3 (388)
ILDESGKKFAMEP	0.81	0.11	cDNA FLJ78033, highly similar to Homo sapiens protein disulfide isomerase family A, member 4, mRNA (484); Protein disulfide-isomerase A4 (484); Putative uncharacterized protein ERP70 (484)
VSNKRSKPDIKME	1.07	0.29	Otoferlin (239)
VVEITGKHEERQD	1.07	0.14	cDNA FLJ52243, highly similar to Heat-shock protein beta-1 (88); Heat shock protein beta-1 (123)
GGKARAKAKSRSS	0.98	0.1	Histone H2A (14); Histone H2A type 1-C (14); Histone H2A type 2-A (14); Histone H2A type 2-B (14); Histone H2A type 2-C (14); Histone H2A type 3 (14); Histone H2A.x (14)
TLVGEDKYGNKYY	0.91	0.12	NADH dehydrogenase [ubiquinone] 1 alpha subcomplex subunit 12 (43); 13kDa differentiation-associated protein variant (43)
KLSPEKKPTRGRL	0.68	0.14	cDNA FLJ16288 fis, clone OCBBF2008724, highly similar to Protein odd-skipped-related 1 (161); Protein odd-skipped-related 1 (161)
EMLQQSKILKVIR	1	0.17	cDNA FLJ77842 (37); cDNA FLJ53619, highly similar to Heat shock protein HSP 90-beta (389); cDNA FLJ54023, highly similar to Heat shock protein HSP 90-beta (361); Heat shock protein HSP 90-alpha (407); Heat shock protein HSP 90-beta (399); Hsp89-alpha-delta-N (214); HSP90AA1 protein (407); Heat shock protein 90kDa alpha (Cytosolic), class B member 1 (24); Full-length cDNA clone CS0CAP007YF18 of Th…
KLIKEIKNYIKAS	0.79	0.11	5C5 (150)
DREKGKKDKDKRE	8	3.42	Transcription initiation factor TFIID subunit 3 (628)
QANDYFKAKDYEN	2.63	0.49	Serine/threonine-protein phosphatase (40); Serine/threonine-protein phosphatase (38); Serine/threonine-protein phosphatase 5 (40)
MKEEYDKIQIADL	3.3	1.26	Pyrin and HIN domain-containing protein 1 (45)
PVNDYSKYINKEI	1.1	0.2	Lysosomal-trafficking regulator (1710)
SKHSWGKTYGEHK	1.61	0.39	Sialic acid synthase (79)
DRKKFCKNAEEFT	2.01	0.34	Ubiquitin carrier protein (106); Ubiquitin carrier protein (196); Ubiquitin-conjugating enzyme E2 L3 (138)
NKIMTEKYNGNRI	1.79	0.52	Tyrosine-protein phosphatase non-receptor type 2 variant 2 (312); Putative uncharacterized protein PTPN2 (312); Tyrosine-protein phosphatase non-receptor type 2 (312); Protein tyrosine phosphatase, non-receptor type 2 isoform 1 variant (289); Tyrosine-protein phosphatase non-receptor type 2 variant 1 (312)
SDNDIRKYEMFAQ	1.94	0.35	VCP protein (423); VCP protein (592); Putative uncharacterized protein DKFZp434K0126 (379); Transitional endoplasmic reticulum ATPase (754)
VASSTQKFQDLGV	9.08	7.16	cDNA FLJ55422, highly similar to Septin-9 (62); SEPT9 protein (23); Septin-9 (62)
AETRGSKKKKKLR	1.83	0.48	cDNA FLJ56182, highly similar to Zinc finger protein 106 (578); Putative uncharacterized protein DKFZp451A177 (287); Zinc finger protein 106 homolog (1350)
VQMMTAKZZZZZZ	2.92	1.7	cDNA FLJ75174, highly similar to Homo sapiens calmodulin 1 (phosphorylase kinase, delta), mRNA (150); cDNA, FLJ96792, highly similar to Homo sapiens calmodulin 2 (phosphorylase kinase, delta) (CALM2), mRNA (149); Calmodulin 3 (Phosphorylase kinase, delta), isoform CRA_b (149); Calmodulin (149); Calmodulin 3 (Phosphorylase kinase, delta), isoform CRA_a (113)
SPETSGKRKKRKQ	4.8	2.77	cDNA FLJ76440, highly similar to Homo sapiens TRIAD3 protein (TRIAD3), transcript variant 1, mRNA (482); cDNA, FLJ95092, highly similar to Homo sapiens TRIAD3 protein (TRIAD3), mRNA (47); cDNA FLJ58201, highly similar to E3 ubiquitin ligase TRIAD3 (EC 6.3.2.-) (237); E3 ubiquitin-protein ligase RNF216 (425)
DYTPGKKKKKKLG	3.21	3.5	cDNA FLJ16830 fis, clone UTERU3022536, highly similar to Chromodomain helicase-DNA-binding protein 4 (EC 3.6.1.-) (89); Chromodomain-helicase-DNA-binding protein 4 (115); CHD4 protein (115)
QHTKGCKRKTNGG	2.11	1.37	CREB-binding protein (1809); Histone acetyltransferase p300 (1772); CBP (290); CREBBP variant protein (1839)
VGEKVFKNIKTVM	55.63	43.19	HCG1734403 (66); cDNA FLJ50562, highly similar to DJ-1-binding protein (66); EF-hand calcium-binding domain-containing protein 6 (172); CAP-binding protein complex interacting protein 1 (91)
KNVQLYKMRNGYE	2.67	1.9	Proteasome (Prosome, macropain) subunit, beta type, 2, isoform CRA_b (43); Proteasome subunit beta type-2 (68); Proteasome beta 2 subunit variant (100)
QIRQSLKEQGYAL	10.53	7.93	cDNA FLJ77253, highly similar to Homo sapiens nuclear receptor interacting protein 1 (NRIP1), mRNA (158); Nuclear receptor-interacting protein 1 (158)
GRRKFIKNKAWSK	2.21	0.87	ATP-dependent RNA helicase DDX55 (517); DDX55 protein (124)
TTSYKLKRHLQSH	2.25	0.69	Zinc finger X-linked protein ZXDA (318); Zinc finger X-linked protein ZXDB (322); Zinc finger protein ZXDC (226)
DQKVLEKQLPGSM	6.3	3.03	cDNA FLJ76932, highly similar to Homo sapiens tubulin-specific chaperone e (TBCE), mRNA (463); cDNA FLJ59210, highly similar to Tubulin-specific chaperone E (514); Tubulin-specific chaperone E (463)
TKGCKRKTNGGCP	7.23	3.69	CREB-binding protein (1811); Histone acetyltransferase p300 (1774); CBP (292); CREBBP variant protein (1841)
GKGKGKKKGKVKE	4.95	1.76	Putative uncharacterized protein TRPM1 (435); Putative uncharacterized protein TRPM1 (429); Transient receptor potential cation channel subfamily M member 1 (435)
SSGRKSKRNEEQK	3.95	1.25	Leucine-rich repeat and death domain-containing protein LOC401387 (76)
QMDIYQKRCEAFG	5.74	2.14	cDNA FLJ36348 fis, clone THYMU2007025, highly similar to TRANSKETOLASE (EC 2.2.1.1) (121); cDNA FLJ54957, highly similar to Transketolase (EC 2.2.1.1) (212); cDNA FLJ56274, highly similar to Transketolase (EC 2.2.1.1) (157); Transketolase variant (204); Putative uncharacterized protein DKFZp686J13123 (59); Transketolase (204)
EEDPEYKKKFRAN	1.64	0.36	Putative uncharacterized protein FLJ13305 (279); Putative uncharacterized protein FAM161A (275); Protein FAM161A (279)
NFVGGNKLQSTGN	1.21	0.23	cDNA FLJ75527, highly similar to Homo sapiens zinc finger RNA binding protein (ZFR), mRNA (509); Zinc finger RNA binding protein (509); Putative uncharacterized protein ZFR (487); Zinc finger RNA-binding protein (509)
CGTLGWKGLPQDM	5.88	1.87	cDNA, FLJ95932, Homo sapiens polyamine modulated factor 1 binding protein 1(PMFBP1), mRNA (980); cDNA FLJ16610 fis, clone TESTI4011532, highly similar to Homo sapiens polyamine modulated factor 1 binding protein 1 (PMFBP1), mRNA (855); Putative uncharacterized protein PMFBP1 (770); Polyamine-modulated factor 1-binding protein 1 (985)
DSPKTPKSPSEKT	10.8	8.31	Transcription factor E2F3 (171)
LPRRIIKETQRLL	4.17	1.95	Ubiquitin-conjugating enzyme E2 N (10)
KLNKITKFIEENK	1.39	1.14	cDNA FLJ46264 fis, clone TESTI4026080, highly similar to Structural maintenance of chromosomes 4-like 1 protein (356); Putative uncharacterized protein SMC4 (381); SMC4 protein (381); Structural maintenance of chromosomes protein 4 (381)
QMDKETKENNLSE	3.48	1.63	Putative uncharacterized protein DLGAP4 (287); Putative uncharacterized protein DLGAP4 (136); Disks large-associated protein 4 (830)
GGIQNEKETMQSL	2.55	1.23	cDNA, FLJ94640, highly similar to Homo sapiens keratin 18 (KRT18), mRNA (81); Putative uncharacterized protein ENSP00000391831 (70); Putative uncharacterized protein ENSP00000396184 (75); Keratin, type I cytoskeletal 18 (81)
PSLVASKLAGZZZ	1.97	0.77	cAMP-regulated phosphoprotein 19 (109)
QLEMTQKPHKKPG	1.76	0.61	Branched-chain-amino-acid aminotransferase, mitochondrial (44); Branched-chain-amino-acid aminotransferase (44)
LKALQEKVEIKQL	1.22	0.35	ATP-dependent DNA helicase 2 subunit 2 (665); Putative uncharacterized protein XRCC5 (501)
FKILLEKLMLAQD	1.13	0.44	cDNA FLJ75831, highly similar to Homo sapiens exportin, tRNA (nuclear export receptor for tRNAs) (XPOT), mRNA (634); Exportin-T (634)
SYCYVSKEELKEL	0.94	0.4	Isopentenyl-diphosphate Delta-isomerase 1 (176)
IVHDEVKDKAFEL	6.59	3.9	Proteasome subunit alpha type-3 (206); Proteasome subunit alpha type (206)
KGVITVKDGKTLN	11.7	7.54	Mitochondrial heat shock 60kD protein 1 variant 1 (202); cDNA FLJ54912, highly similar to 60 kDa heat shock protein, mitochondrial (179); cDNA FLJ51028, highly similar to 60 kDa heat shock protein, mitochondrial (58); cDNA FLJ54373, highly similar to 60 kDa heat shock protein, mitochondrial (193); cDNA FLJ51046, highly similar to 60 kDa heat shock protein, mitochondrial (146); 60 kDa chaperonin (…
PKKGSKKAVTKAQ	7.29	4.21	Histone H2B (17); Histone H2B type 1-C/E/F/G/I (17); Histone H2B type 1-D (17); Histone H2B type 1-H (17); Histone H2B type 1-J (17); Histone H2B type 1-K (17); Histone H2B type 1-L (17); Histone H2B type 1-N (17); Histone H2B type 1-O (17); Putative histone H2B type 2-C (17); Putative histone H2B type 2-D (17); Histone H2B type 2-E (17); Histone H2B type 3-B (17); Histone H2B type F-S (17); HIST…
YRDDNGKPYVLPS	2.59	1.89	Aspartate aminotransferase, mitochondrial (73); Aspartate aminotransferase (14); Aspartate aminotransferase (73); cDNA FLJ54203, highly similar to Aspartate aminotransferase, mitochondrial (EC 2.6.1.1) (73)
ASSSGSKAEFIVG	82	58.9	Casein kinase I isoform alpha (8); CSNK1A1 protein (8); Casein kinase 1, alpha 1, isoform CRA_g (8)
QESCEKKDFLSAP	7	3.31	Protocadherin gamma-A2 (788)
LCNSPQKPNDRDH	7.77	3.01	cDNA FLJ41911 fis, clone PEBLM2008605, highly similar to Very-long-chain acyl-CoA synthetase (EC 6.2.1.-) (90); Solute carrier family 27 (Fatty acid transporter), member 2 variant (325); SLC27A2 protein (272); Very long-chain acyl-CoA synthetase (325)
SEFYSKKNTIMFD	3.88	2.02	Ubiquitin-like domain-containing CTD phosphatase 1 (246)
GNSHGGKKGNEEK	3.68	2.48	cDNA FLJ51300, highly similar to Homo sapiens EGF-like-domain, multiple 6 (EGFL6), mRNA (233); Epidermal growth factor-like protein 6 (332)
KASQSRKRSLATM	4.13	2.27	cDNA FLJ51571, moderately similar to Mediator of DNA damage checkpoint protein 1 (1378); Putative uncharacterized protein ENSP00000403601 (501); Mediator of DNA damage checkpoint protein 1 (1812)
SSDVLPKZZZZZZ	3.28	2.87	Putative uncharacterized protein AHCTF1 (1624); cDNA FLJ77754, highly similar to Homo sapiens keratin 8 (KRT8), mRNA (483); cDNA FLJ34045 fis, clone FCBBF2007095, highly similar to AT-hook-containing transcription factor 1 (164); cDNA FLJ38079 fis, clone CTONG2016056, highly similar to AT-hook-containing transcription factor 1 (477); cDNA FLJ16456 fis, clone BRAWH3009013, highly similar to AT-hoo…
GDEEKDKGLQTSQ	6.88	3.72	cDNA FLJ53009, highly similar to Calreticulin (48); Calreticulin (64); Calreticulin variant (53)
RSTMNFKIGGVTE	24.06	21.62	cDNA, FLJ92753, Homo sapiens fumarate hydratase (FH), nuclear gene encodingmitochondrial protein, mRNA (80); Fumarate hydratase, mitochondrial (80)
YTKKKKKGKKGKK	5.74	4.2	Alpha thalassemia/mental retardation syndrome X-linked (1933); Transcriptional regulator ATRX (1933); cDNA FLJ56865, highly similar to Transcriptional regulator ATRX (EC 3.6.1.-) (299); cDNA FLJ56848, highly similar to Transcriptional regulator ATRX (EC 3.6.1.-) (95)
DKKVKAKDVDEYK	5	2.28	cDNA FLJ33998 fis, clone FCBBF1000023, moderately similar to Mus musculus pleckstrin and Sec7 domain containing 3 (Psd3), transcript variant 2, mRNA (961); cDNA FLJ54694, highly similar to Pleckstrin and Sec7 domain-containing protein3 (290); PH and SEC7 domain-containing protein 3 (962); Putative uncharacterized protein DKFZp686A1849 (183)
WHTIMWKEENSPP	4.82	2.4	ATPase, aminophospholipid transporter-like, Class I, type 8A, member 2 (128)
NIWIPMKPYYTKV	1.25	0.47	6.8 kDa mitochondrial proteolipid (14)
ZZZZZVKQIESKT	1.73	1.47	Thioredoxin, isoform CRA_b (8); Thioredoxin delta 3 (7); Thioredoxin (8)
REQSTRKENIQTG	0.92	0.59	Chromosome 6 open reading frame 103 (454); cDNA: FLJ23121 fis, clone LNG07996 (454)
ZZZMGQKVTGGIK	1.14	0.51	SplA/ryanodine receptor domain and SOCS box containing 1 (7); SPRY domain-containing SOCS box protein 1 (7)
NLLTSGKKKKEMQ	1.95	1.21	CD3EAP protein (174); cDNA FLJ75784, highly similar to Homo sapiens CD3E antigen, epsilon polypeptide associated protein (CD3EAP), mRNA (174); DNA-directed RNA polymerase I subunit RPA34 (174)
SRKKSGKKGQASL	1.51	0.93	cDNA FLJ57671, highly similar to SWI/SNF-related matrix-associated actin-dependent regulator of chromatin subfamily C member 1 (236); SMARCC1 protein (345); SWI/SNF related, matrix associated, actin dependent regulator of chromatin, subfamily c, member 1 (345); SWI/SNF complex subunit SMARCC1 (345)
ISQSAVKTKFEQH	10.08	6.92	Putative uncharacterized protein MFN2 (77); cDNA FLJ11885 fis, clone HEMBA1007203, highly similar to Transmembrane GTPase MFN2 (EC 3.6.5.-) (77); cDNA FLJ57997, highly similar to Transmembrane GTPase MFN2 (EC 3.6.5.-) (219); Putative uncharacterized protein MFN1 (197); Mitofusin-1 (334); Mitofusin-2 (355); MFN1 protein (334); Mitochondrial transmembrane GTPase Fzo-1 (334); Mitochondrial transmemb…
SECFPCKPGTYAD	14.96	8.96	cDNA FLJ55893, moderately similar to Mus musculus sushi, von Willebrand factor type A, EGF and pentraxin domain containing 1, mRNA (214); cDNA FLJ55725, moderately similar to Homo sapiens signal peptide, CUB domain, EGF-like 1 (SCUBE1), mRNA (215); cDNA FLJ56163, moderately similar to Mus musculus sushi, von Willebrand factor type A, EGF and pentraxin domain containing 1, mRNA (59); cDNA FLJ52912…
LYNTALKPGHAAA	7.58	4.04	Putative uncharacterized protein GLT8D1 (125); Putative uncharacterized protein GLT8D1 (189); Glycosyltransferase 8 domain-containing protein 1 (189); MSTP139 (20)
LISAFQKPDQGIV	2.61	1.18	cDNA, FLJ92177, Homo sapiens SH2 domain protein 1A, Duncan's disease(lymphoproliferative syndrome) (SH2D1A), mRNA (89); SH2 domain-containing protein 1A (89)
VLVEDTKVLVQNA	6.21	7.39	Talin 1 (1925); Talin-1 (2031)
VDEQIKKQQETLV	1.53	0.58	ZNF568 protein (129); Putative uncharacterized protein ZNF568 (116); Zinc finger protein 568 (130)
LREGCKKILVADS	2.32	1.09	cDNA, FLJ95380, highly similar to Homo sapiens vacuolar protein sorting 41 (yeast) (VPS41), transcript variant 1, mRNA (762); cDNA FLJ58251, highly similar to Vacuolar assembly protein VPS41 homolog (664); Putative uncharacterized protein VPS41 (110); Putative uncharacterized protein VPS41 (612); HVps41p (687); Vacuolar protein sorting-associated protein 41 homolog (762)
VILLFSKGTGZZZ	1.34	0.51	Olfactory receptor 52H1 (317)
DKFVGIKDEDQLE	5.41	2.62	cDNA FLJ55158, highly similar to Thioredoxin, mitochondrial (183); Thioredoxin, mitochondrial (152)
PFCLNIKQKLRQQ	3.34	1.2	Histone acetyltransferase p300 (1810)
EGEGLGKYSQGRK	1.77	0.2	cDNA FLJ77620 (108); S-adenosyl-L-methionine-dependent methyltransferase FTSJD2 (108); FtsJ methyltransferase domain containing 2 (108)
LCRQMTKTISEVI	2.04	0.35	Tctex1 domain-containing protein 1 (108)
MFLMKWKNSDEAD	1.75	0.26	Putative uncharacterized protein CBX1 (143); Chromobox protein homolog 1 (139); cDNA, FLJ92997, Homo sapiens chromobox homolog 1 (HP1 beta homolog Drosophila ) (CBX1), mRNA (139)
NRVVVTKYCDPDS	1.69	0.58	U2 small nuclear RNA auxiliary factor 2 isoform b (458); Splicing factor U2AF 65 kDa subunit (462)
VRLQVFKTEQKGW	2.94	1.81	CLLL8 protein variant (91); Histone-lysine N-methyltransferase SETDB2 (373)
SVTLLIKGPNKHT	3.25	0.81	Chaperonin subunit 6A (334); Putative uncharacterized protein CCT6A (332); cDNA, FLJ94440, highly similar to Homo sapiens chaperonin containing TCP1, subunit 6A (zeta 1)(CCT6A), mRNA (377); cDNA FLJ53065, highly similar to T-complex protein 1 subunit zeta (235); cDNA, FLJ79129, highly similar to T-complex protein 1 subunit zeta (346); Chaperonin containing TCP1, subunit 6A isoform a variant (375)…
TDQSKWKAYDATH	6.35	2.45	Putative uncharacterized protein ESD (148); S-formylglutathione hydrolase (200)
EVLHALKEKVTSL	1.93	0.34	Putative uncharacterized protein C2orf47 (173); Uncharacterized protein C2orf47, mitochondrial (180)
NVFKIVKMIMERN	1.88	0.66	cDNA FLJ76877, highly similar to Homo sapiens superkiller viralicidic activity 2-like 2 (SKIV2L2), mRNA (379); cDNA FLJ55446, highly similar to Superkiller viralicidic activity 2-like 2 (EC 3.6.1.-) (278); Superkiller viralicidic activity 2-like 2 (379)
EVQKLFKRKNNQI	3.14	0.85	cDNA FLJ51224 (112); Tetratricopeptide repeat protein 39C (419)
PRELLEKLIESRQ	3.58	1.15	cDNA FLJ36073 fis, clone TESTI2019697, highly similar to THIMET OLIGOPEPTIDASE (EC 3.4.24.15) (49); cDNA FLJ56247, highly similar to Thimet oligopeptidase (EC 3.4.24.15) (417); Thimet oligopeptidase 1 (538); THOP1 protein (440); Thimet oligopeptidase (538)
DVLEFLKVYEKHS	1.6	0.5	Fructose-1,6-bisphosphatase 1 (330)
IQHAVFKELVKLV	4.31	1.37	cDNA FLJ54343, highly similar to Signal recognition particle 54 kDa protein (43); cDNA FLJ50234, highly similar to Signal recognition particle 54 kDa protein (32); Signal recognition particle 54 kDa protein (81)
EQDRPLKCDEPIL	2.85	1.9	Phosphatidylethanolamine-binding protein 1 (132)
LYWDLEKKAKRQG	2.96	0.73	Putative uncharacterized protein FANK1 (27); cDNA FLJ52987, highly similar to Fibronectin type 3 and ankyrin repeat domains protein 1 (27); Putative uncharacterized protein FANK1 (33); Fibronectin type 3 and ankyrin repeat domains protein 1 (33)
KMNRDNKEGQEPA	3.1	1.1	Putative uncharacterized protein KDM2B (727); cDNA FLJ55590, highly similar to JmjC domain-containing histone demethylation protein 1B (EC 1.14.11.-) (201); cDNA, FLJ79369, highly similar to JmjC domain-containing histone demethylation protein 1B (EC 1.14.11.-) (198); Lysine-specific demethylase 2B (758)
MESGTKKDNSILE	3.33	1.06	Leucine-rich repeat transmembrane protein FLRT1 (579); Putative uncharacterized protein (179)
TMDTESKKDPEGC	1.76	0.51	cDNA FLJ78654, highly similar to Homo sapiens nuclear factor of kappa light polypeptide gene enhancer in B-cells 1 (p105) (NFKB1), mRNA (441); cDNA FLJ16470 fis, clone BRHIP3009181, highly similar to NUCLEAR FACTOR NF-KAPPA-B P105 SUBUNIT (260); Nuclear factor NF-kappa-B p105 subunit (440)
QKLFKRKNNQIEQ	3.69	1.55	cDNA FLJ51224 (114); Tetratricopeptide repeat protein 39C (421)
EEKQELKEKLKET	1.85	0.47	MORC family CW-type zinc finger protein 4 (857); MORC family CW-type zinc finger protein 4 (605); cDNA FLJ56908, highly similar to MORC family CW-type zinc finger 4 (765)
NSVNILKAHGRSQ	1.22	0.37	T-complex protein 1 subunit alpha (199)
KKQRTGKKIHVCQ	1.86	0.4	cDNA FLJ32781 fis, clone TESTI2002149, highly similar to ZINC FINGER PROTEIN 131 (291); Zinc finger protein 131 (325)
ERERAEKKKRATK	2.11	0.67	SWI/SNF related, matrix associated, actin dependent regulator of chromatin, subfamily a, member 1, isoform CRA_d (1038); Probable global transcription activator SNF2L1 (1038)
MEWITAKLKEARG	2.57	0.64	cDNA FLJ40373 fis, clone TESTI2035003, highly similar to 6-phosphofructokinase type C (EC 2.7.1.11) (118); Phosphofructokinase, platelet (52); cDNA FLJ35278 fis, clone PROST2006579, highly similar to 6-phosphofructokinase type C (EC 2.7.1.11) (692); 6-phosphofructokinase type C (700); PFKP protein (118); Phosphofructokinase, platelet (692); Similar to phosphofructokinase, platelet (363)
RRVIGAKKDQYFL	1.87	0.58	cDNA, FLJ79494, highly similar to Structural maintenance of chromosome 3 (105); Structural maintenance of chromosomes 3 (105); Structural maintenance of chromosomes protein 3 (105)
KDPHGEKREFQDA	2.29	0.53	Death-inducer obliterator 1 (1852)
EDTEGDKVRATRT	1.56	0.3	Platelet glycoprotein Ib alpha polypeptide (304); Platelet glycoprotein Ib alpha chain (304); Glycoprotein Ib alpha polypeptide (156)
EKQQEEKQQTTLT	1.48	0.21	cDNA FLJ16598 fis, clone TESTI4006473, weakly similar to ATP-dependent RNA helicase A (316); Probable ATP-dependent RNA helicase YTHDC2 (406)
PEFSKVKTKTPKH	2.7	0.95	Putative uncharacterized protein MSL1 (355); Male-specific lethal 1 homolog (355)
MDEMNGKEIEGEE	2.63	1.16	cDNA, FLJ93632, highly similar to Homo sapiens heterogeneous nuclear ribonucleoprotein R (HNRPR), mRNA (397); cDNA FLJ53358, highly similar to Heterogeneous nuclear ribonucleoprotein R (359); cDNA FLJ53360, highly similar to Heterogeneous nuclear ribonucleoprotein R (237); Heterogeneous nuclear ribonucleoprotein R, isoform CRA_a (258); Heterogeneous nuclear ribonucleoprotein R (397); HNRPR protei…
ZZMAGGKAGKDSG	1.48	0.48	Histone H2A (7); Histone H2A.V (7); Histone H2A.Z (7)
DFALIHKERKKAN	1.78	0.3	Phosphoribosyl pyrophosphate synthetase 1 (94); Ribose-phosphate pyrophosphokinase (194); Ribose-phosphate pyrophosphokinase (127); Ribose-phosphate pyrophosphokinase 1 (194); Ribose-phosphate pyrophosphokinase 3 (194)
DKVPPIKPNAGEE	2.53	0.49	cDNA FLJ37560 fis, clone BRCOC2000333, highly similar to Succinate dehydrogenase (ubiquinone) flavoprotein subunit, mitochondrial (EC 1.3.5.1) (260); cDNA FLJ16373 fis, clone THYMU3000269, highly similar to Succinate dehydrogenase (ubiquinone) flavoprotein subunit, mitochondrial (EC 1.3.5.1) (79); cDNA FLJ55072, highly similar to Succinate dehydrogenase (ubiquinone) flavoprotein subunit, mitochon…
LGTGAGKGELERA	1.42	0.3	Putative uncharacterized protein SFRS7 (24); cDNA FLJ59182, highly similar to Splicing factor, arginine/serine-rich 7 (24); cDNA FLJ60677, highly similar to Splicing factor, arginine/serine-rich 7 (24); Putative uncharacterized protein SFRS7 (12); Splicing factor, arginine/serine-rich 7, 35kDa, isoform CRA_d (24); cDNA FLJ34106 fis, clone FCBBF3008073, highly similar to SPLICING FACTOR, ARGININE/…
ZZMVKVKAGVNRF	1.39	0.27	NA
ZZZZMKKRNKNEV	1.31	0.23	NA
PGQSKKKIFKPEE	4.22	2.25	Histone acetyltransferase p300 (1047); EP300 protein (1047)
RRMKWKKESNLTS	6.04	2.53	Homeobox protein Hox-C6 (198); HOXC6 protein (198)
DTQNALKNYRTAY	4.17	1.34	cDNA FLJ39026 fis, clone NT2RP7005675 (245); Putative uncharacterized protein C4orf41 (245); UPF0636 protein C4orf41 (245)
NPHKTRKSVYGLQ	3.42	0.73	Putative uncharacterized protein RGS7 (228); cDNA FLJ55428, highly similar to Regulator of G-protein signaling 7 (144); cDNA FLJ61685, highly similar to Regulator of G-protein signaling 7 (202); Putative uncharacterized protein RGS7 (202); Regulator of G-protein signaling 7 (59); Regulator of G-protein signaling 7 (228)
TYQHPPKDSSGQH	2.64	0.64	Aconitase 2, mitochondrial (574); Aconitate hydratase, mitochondrial (549); cDNA, FLJ95737, highly similar to Homo sapiens aconitase 2, mitochondrial (ACO2), nuclear geneencoding mitochondrial protein, mRNA (549); cDNA FLJ60429, highly similar to Aconitate hydratase, mitochondrial (EC 4.2.1.3) (270); cDNA FLJ54329, highly similar to Aconitate hydratase, mitochondrial(EC 4.2.1.3) (466); cDNA FLJ52…
ZMESYHKPDQQKL	3.24	0.87	cDNA FLJ36348 fis, clone THYMU2007025, highly similar to TRANSKETOLASE (EC 2.2.1.1) (7); cDNA FLJ54957, highly similar to Transketolase (EC 2.2.1.1) (7); Putative uncharacterized protein TKT (7); Transketolase variant (7); Transketolase (7)
DVGRMFKQFNKLT	3.94	2.35	cDNA, FLJ94025, highly similar to Homo sapiens tripartite motif-containing 28 (TRIM28), mRNA (770); Transcription intermediary factor 1-beta (770)
GKFVESKSDKWID	1.92	0.27	cDNA FLJ51820, highly similar to Methylmalonate-semialdehyde dehydrogenase[acylating], mitochondrial (EC 1.2.1.27) (52); Methylmalonate-semialdehyde dehydrogenase [acylating], mitochondrial (52); Methylmalonate semialdehyde dehydrogenase (45); Aldehyde dehydrogenase 6A1 variant (52)
WAHLIEKMFQPKN	1.97	0.36	cDNA, FLJ92992, highly similar to Homo sapiens methylmalonyl Coenzyme A mutase (MUT), nuclear gene encoding mitochondrial protein, mRNA (335); Methylmalonyl-CoA mutase, mitochondrial (335)
REGTFSKSDSEKI	1.57	0.24	Putative uncharacterized protein RIF1 (1274); Telomere-associated protein RIF1 (1274)
YFKTEHKLEITML	1.87	0.21	cDNA FLJ40024 fis, clone STOMA2007745, highly similar to UBIQUITIN-ACTIVATING ENZYME E1 (432); cDNA FLJ54582, highly similar to Ubiquitin-activating enzyme E1 (496); cDNA FLJ53392, highly similar to Ubiquitin-activating enzyme E1 (529); Ubiquitin-like modifier activating enzyme 1 (432); Ubiquitin activating enzyme E1 (28); Ubiquitin-like modifier-activating enzyme 1 (984)
DKHWTAKNSRVVC	2.55	0.35	cDNA, FLJ92562, highly similar to Homo sapiens lysyl oxidase-like 2 (LOXL2), mRNA (225); Lysyl oxidase homolog 2 (225); Lysyl oxidase-like 2 variant (225)
RLRKSGKEHIDNI	1.72	0.46	Muscle-related coiled-coil protein (192)
PPICFVKPTSSMT	0.89	0.23	Tumor susceptibility gene 101 protein (90)
MFLMKWKDTDEAD	2.05	0.48	Chromobox protein homolog 5 (143)
FLCHMHKEIRQLL	1.92	0.45	cDNA FLJ60345, highly similar to Protein transport protein Sec24C (968); cDNA FLJ60379, highly similar to Protein transport protein Sec24C (335); cDNA, FLJ79350, highly similar to Protein transport protein Sec24C (335); Protein transport protein Sec24C (1087)
IERMIEKLFPCVI	1.42	0.23	Protein patched homolog 2 (179)
KEPCMAKFGPLPS	1.94	0.43	Tumor necrosis factor (Ligand) superfamily, member 18 (83); cDNA, FLJ93785, Homo sapiens tumor necrosis factor (ligand) superfamily, member 18(TNFSF18), mRNA (61); Tumor necrosis factor ligand superfamily member 18 (61)
PLQVKCKDCEERR	1.07	0.26	Spindle assembly abnormal protein 6 homolog (17)
KAEVEGKDLPEHA	1.13	0.25	cDNA FLJ44920 fis, clone BRAMY3011501, highly similar to Heterogeneous nuclear ribonucleoprotein U (551); cDNA FLJ54020, highly similar to Heterogeneous nuclear ribonucleoprotein U (585); Heterogeneous nuclear ribonucleoprotein U (626); Heterogeneous nuclear ribonucleoprotein U (Scaffold attachment factor A) (524); Heterogeneous nuclear ribonucleoprotein U (Scaffold attachment factor A) (350); He…
NQDHDLKPLGPKS	1.22	0.27	cDNA FLJ77052, highly similar to Homo sapiens FYN binding protein (FYB-120/130) (FYB), transcript variant 1, mRNA (149); cDNA FLJ56106, highly similar to Homo sapiens FYN binding protein (FYB-120/130) (FYB), transcript variant 1, mRNA (159); FYN-binding protein (149); FYB protein (149); FYN binding protein (FYB-120/130), isoform CRA_d (149)
KLHVAVKVLQDMG	1.19	0.57	cDNA FLJ77456, highly similar to Homo sapiens interleukin enhancer binding factor 3, 90kDa (ILF3), transcript variant 2, mRNA (460); cDNA FLJ58050, highly similar to Interleukin enhancer-binding factor 3 (58); cDNA FLJ58801, highly similar to Interleukin enhancer-binding factor 3 (264); Putative uncharacterized protein ILF3 (460); Interleukin enhancer-binding factor 3 (460)
ZZMQSNKTFNLEK	1.11	0.3	Putative uncharacterized protein NONO (7); Non-POU domain-containing octamer-binding protein (7)
AFAPYNKPSLSGA	1.45	1.03	cDNA FLJ57254, highly similar to Protein deltex-2 (158); Protein deltex-2 (249); Zinc ion binding protein (249); Deltex 2B (249)
ZZMATLKDQLIYN	1.4	0.43	L-lactate dehydrogenase (7); L-lactate dehydrogenase (36); L-lactate dehydrogenase A chain (7)
NRSVYIKGFPTDA	1.64	0.31	Autoantigen La (116); Lupus La protein (116); Ribonucleoprotein (La) (63); Sjogren syndrome antigen B (Autoantigen La), isoform CRA_c (116)
AAVTYSKPRLATF	1.76	0.4	ATP synthase subunit g, mitochondrial (24)
YRLSFLKEDSQSC	1.24	0.41	MMS19 nucleotide excision repair homolog (S. cerevisiae) (70); cDNA FLJ55586, highly similar to MMS19-like protein (517); cDNA FLJ54519, highly similar to MMS19-like protein (453); MMS19 nucleotide excision repair protein homolog (496); Putative uncharacterized protein (58)
[truncated: 4,804 more rows]
